# Supplementary material for: Re-examining the stereochemistry of polycyclic suffruticosine via TDDFT calculations, ECD spectroscopy, and chemical synthesis
Source: Royal Society of Chemistry journal article supplement (doi:10.1039/d3qo01098h), 2023-01-01

## Electronic Supplementary Information (ESI)

### Re-examining the stereochemistry of suffruticosine via TDDFT calculations, ECD spectroscopy, and chemical synthesis

Taewan Kim,<sup>a</sup> Samhwan Kim,<sup>a</sup> Garam Chung,<sup>a,b</sup> Kiyoung Park,<sup>a,\*</sup> and Sunkyu Han<sup>a,\*</sup>

<sup>a</sup> Department of Chemistry, Korea Advanced Institute of Science & Technology (KAIST), Daejeon 34141, Republic of Korea

<sup>b</sup> Current address: LiB Raw Materials Research Group, LiB Materials R&D Laboratories, POSCO N.EX.T Hub, Pohang 37673, Republic of Korea

|                                                                                                                      |    |
|----------------------------------------------------------------------------------------------------------------------|----|
| <b>1. General Information</b> .....                                                                                  | 3  |
| <b>2. Reconstructing ECD spectrum from the Isolation Paper</b> .....                                                 | 5  |
| <b>3. DFT functional validation</b> .....                                                                            | 7  |
| <b>4. Computational Studies of the Originally Proposed Suffruticosine (10)</b> .....                                 | 9  |
| <b>5. Absorption and Electronic Circular Dichroism (ECD) Spectra of securinine (1) and allosecurinine (14)</b> ..... | 11 |
| <b>5.1 Securinine (1)</b> .....                                                                                      | 11 |
| <b>5.2 Allosecurinine (14)</b> .....                                                                                 | 13 |
| <b>6. Computational Studies of Securinine (1)</b> .....                                                              | 15 |
| <b>6.1 Conformer 1a, securinine</b> .....                                                                            | 17 |
| <b>6.2 Conformer 1b, securinine</b> .....                                                                            | 19 |
| <b>6.3 Conformer 1c, securinine</b> .....                                                                            | 21 |
| <b>6.4 Conformer 2a, securinine</b> .....                                                                            | 23 |
| <b>6.5 Conformer 2b, securinine</b> .....                                                                            | 25 |
| <b>7. Computational Studies of Allosecurinine (14)</b> .....                                                         | 27 |
| <b>7.1 Conformer 1a, allosecurinine</b> .....                                                                        | 29 |
| <b>7.2 Conformer 1b, allosecurinine</b> .....                                                                        | 31 |
| <b>7.3 Conformer 1c, allosecurinine</b> .....                                                                        | 33 |
| <b>7.4 Conformer 1d, allosecurinine</b> .....                                                                        | 35 |
| <b>7.5 Conformer 2a, allosecurinine</b> .....                                                                        | 37 |

|                                                                                                  |            |
|--------------------------------------------------------------------------------------------------|------------|
| 7.6 Conformer 2b, allosecurinine .....                                                           | 39         |
| 7.7 Results of TDDFT calculation: relation between conformation and ECD spectra .....            | 41         |
| <b>8. Experimental Procedures and Physical Data for Newly Synthesized Compounds .....</b>        | <b>43</b>  |
| 8.1 Unsaturated $\delta$ -lactam 16 .....                                                        | 43         |
| 8.2 Boc-protected spiro- $\delta$ -lactam 20 .....                                               | 44         |
| 8.3 Spiro- $\delta$ -lactam 21 .....                                                             | 45         |
| 8.4 Alcohol 22 .....                                                                             | 46         |
| 8.5 Ketone 23 .....                                                                              | 47         |
| 8.6 Hemiaminal ether 25 .....                                                                    | 48         |
| <b>9. Single Crystal X-Ray Diffraction Analysis of Spiro-<math>\delta</math>-lactam 21 .....</b> | <b>49</b>  |
| <b>10. Absorption and ECD Spectra of hemiaminal ether 25 .....</b>                               | <b>74</b>  |
| <b>11. Computational Studies of hemiaminal ether 25 .....</b>                                    | <b>76</b>  |
| <b>12. Computational Studies of Possible Suffruticosine Candidates (26–33) .....</b>             | <b>79</b>  |
| 12.1 Analysis of shifts of band 3 by TDDFT calculation .....                                     | 83         |
| 12.2 DP4+ Probability analysis of possible eight candidates of suffruticosine (26–33) .....      | 87         |
| <b>13. Cartesian Coordinates of the Optimized Geometries .....</b>                               | <b>90</b>  |
| <b>14. References .....</b>                                                                      | <b>105</b> |
| <b>15. Copies of NMR spectra of newly synthesized compounds .....</b>                            | <b>106</b> |

## 1. General Information

### Calculations

All DFT and time-dependent DFT (TDDFT) calculations were conducted by Gaussian 09 package<sup>1</sup>. Geometry optimization, single point energies, analytical vibrational frequencies within the harmonic approximation, and excitation energies were conducted with using B3LYP functional<sup>2, 3</sup> and 6-311G(d) basis set<sup>4-6</sup>. The conductor-like polarizable continuum solvation model (CPCM)<sup>7</sup> was used with the dielectric constant of  $\epsilon = 32.613$  for methanol and  $\epsilon = 35.68$  for acetonitrile. Gauge-invariant atomic orbital (GIAO) calculations for NMR prediction were conducted with using B3LYP functional, 6-311G(d) basis set and polarizable continuum model (PCM) with the dielectric constant of  $\epsilon = 4.7113$  for chloroform. All optimized structures were checked whether they have imaginary frequencies or not. DP4+ analyses were performed with following Sarotti's protocol except Boltzmann average of conformers.<sup>8</sup> Calculating orbital contributions of electronic transitions were performed with the QMForge 2.4 software.<sup>9</sup>

All conformers were firstly manually found by systematical search with MM2 calculation embedded in Chem3D and subsequent DFT calculation. The conformations were found starting with the nitrogen lone pair, as allosecurinine, securinine and suffruticosine have rigid fused ring structures except for the piperidine ring. For allosecurinine and securinine, each was firstly differentiated whether the nitrogen lone pair and C2 methine lies *syn* or *anti*. For each case, a boat or chair conformation was found and optimized. Same systematic searching was done to find conformers of suffruticosine, starting with the position of nitrogen lone pair and oxygen.

### Experiments

All reactions were performed in oven-dried or flame-dried flasks or vials. Unless otherwise noted, the flasks were fitted with rubber septa and reactions were conducted under a positive pressure of argon, and vials were tightly sealed with plastic septa and parafilm. Stainless steel syringes or cannula were used to transfer air- and moisture-sensitive liquids. Flash column chromatography was performed as described by Still et al. using silica gel (60-Å pore size, 40–63  $\mu\text{m}$ , 4-6% H<sub>2</sub>O content, Merck) or aluminum oxide (activated, basic, Brockmann I, 58 Å pore size, Merck).<sup>10</sup> Analytical thin-layer chromatography (TLC) was performed using glass plates pre-coated with 0.25 mm silica gel or basic aluminum oxide impregnated with a fluorescent indicator (254 nm). Thin layer chromatography plates were visualized by exposure to ultraviolet light, and/or an aqueous potassium permanganate (KMnO<sub>4</sub>) solution.

Unless otherwise stated, all commercial reagents and solvents were used without additional purification with the following exceptions as indicated below. Dichloromethane and tetrahydrofuran were purchased from Merck and Daejung Inc., respectively and were purified by the method of Grubbs et al. under positive argon pressure.<sup>11</sup> Securinine (**1**) is supplied by Santa Cruz Biotechnology Inc. under catalog number SC-220097A.

$^1\text{H}$  and  $^{13}\text{C}$  nuclear magnetic resonance (NMR) spectra were recorded with Agilent Technologies DD2 (600 MHz), Bruker AVANCE NEO (500 MHz) and calibrated by using the residual undeuterated chloroform ( $\delta_{\text{H}} = 7.24$  ppm) and  $\text{CDCl}_3$  ( $\delta_{\text{C}} = 77.23$  ppm). Data are reported in the following manners: chemical shift in ppm [multiplicity (s = singlet, d = doublet, t = triplet, q = quartet, p = quintet, m = multiplet, app = apparent, br = broad), coupling constant(s) in Hertz, integration]. Electronic circular dichroism spectra (ECD) and absorption spectra were measured with JASCO J-1500 circular dichroism spectrophotometer. Absorbance were converted to molar extinction coefficient ( $\epsilon$ ,  $\text{M}^{-1}\text{cm}^{-1}$ ) by using Beer-Lambert law ( $A = \epsilon lC$ ). Ellipticity (mdeg) was converted to molar extinction coefficient ( $\Delta\epsilon$ ,  $\text{M}^{-1}\text{cm}^{-1}$ ) by using a factor of 32.98 ( $\theta = 32.98\Delta\text{Abs}$ ). High resolution mass spectra were obtained from KAIST Analysis Center for Research Advancement (Daejeon) by using ESI ionization method. Specific rotations ( $[\alpha]_D^T$ ) were obtained by JASCO P-2000 polarimeter.

## 2. Reconstructing ECD spectrum from the Isolation Paper

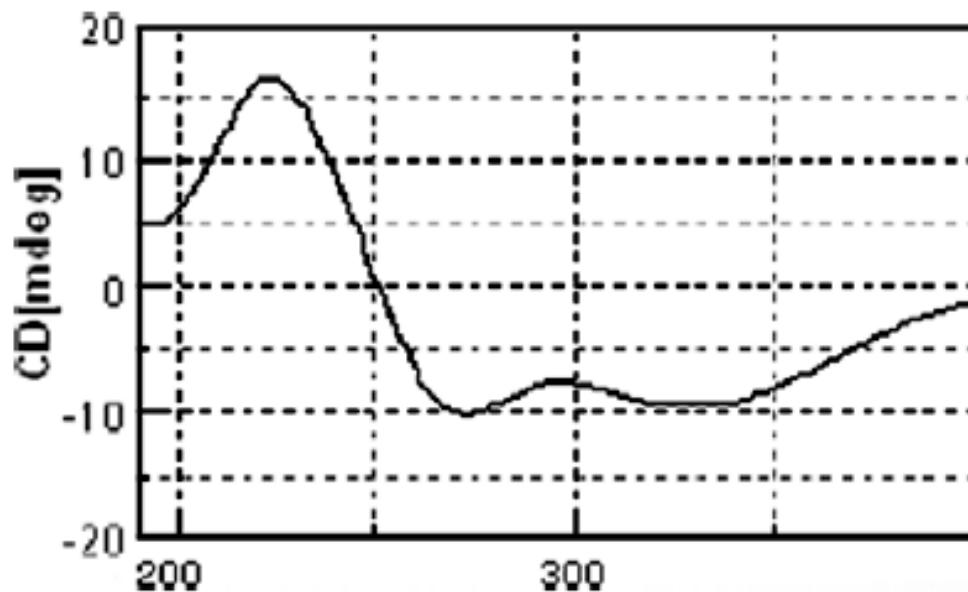

**Figure S1.** ECD spectrum of suffruticosine cropped from the original paper.<sup>12</sup>  $\lambda_{\max}$  223 nm ( $\Delta\epsilon$  +12.87, MeOH)

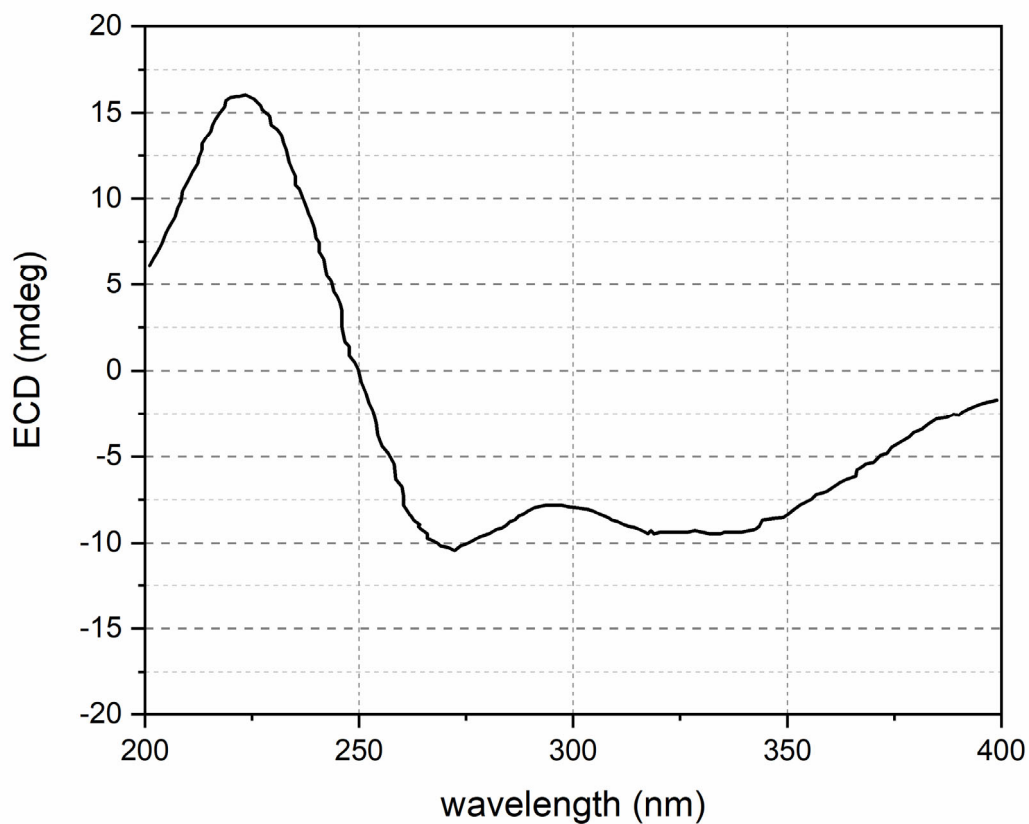

**Figure S2.** Reconstructed ECD spectrum by Graph Data Extractor (freeware) with 177 points.

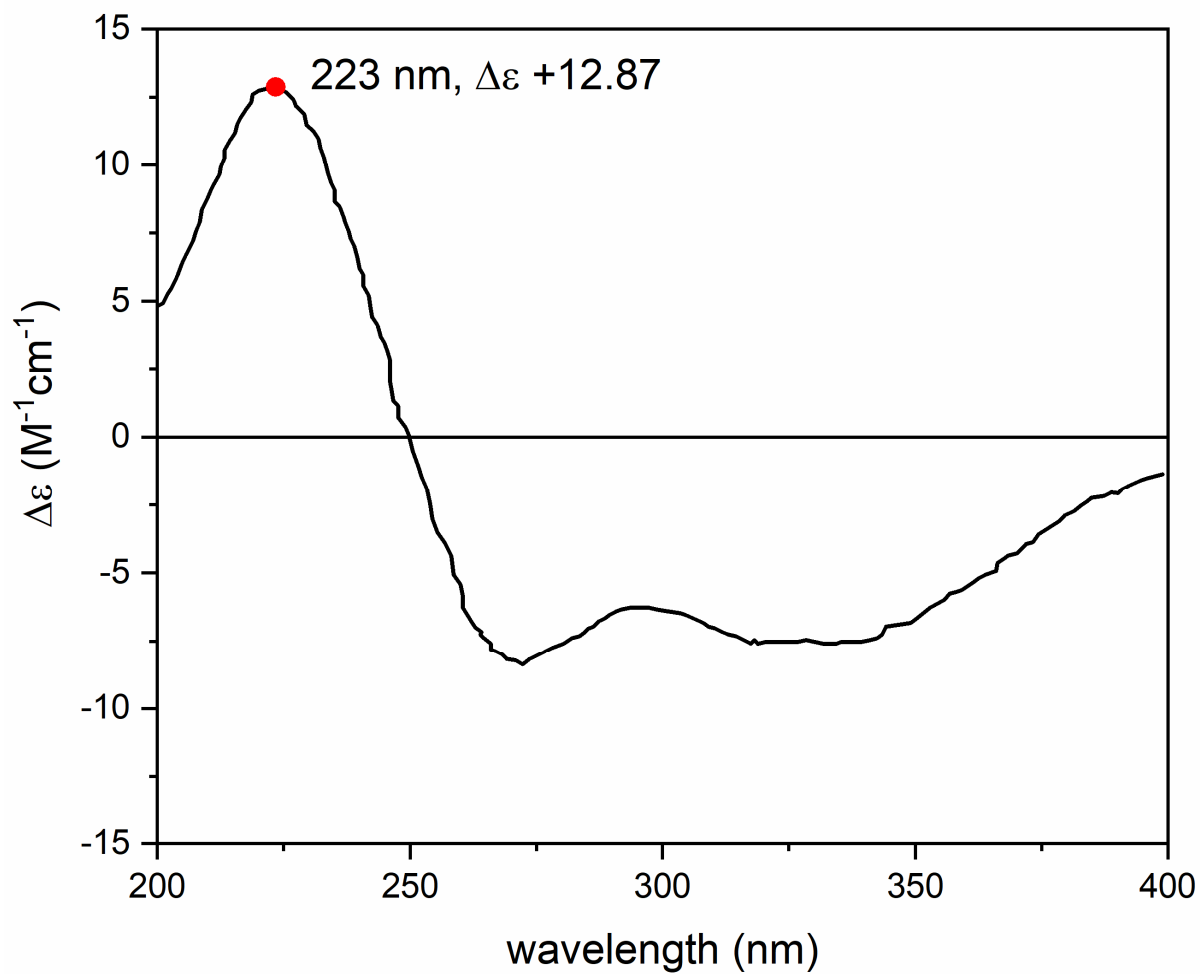

**Figure S3.** Reconstructed ECD spectrum in  $\Delta\epsilon$  ( $M^{-1}cm^{-1}$ )

*Note*

The UV/Vis spectrum of suffruticosine was not shown. Instead, only data were given.<sup>12</sup>

UV(MeOH)  $\lambda_{max}$  (log  $\epsilon$ ) 258 nm (4.06),  $\epsilon = 11481 M^{-1}cm^{-1}$

### 3. DFT functional validation

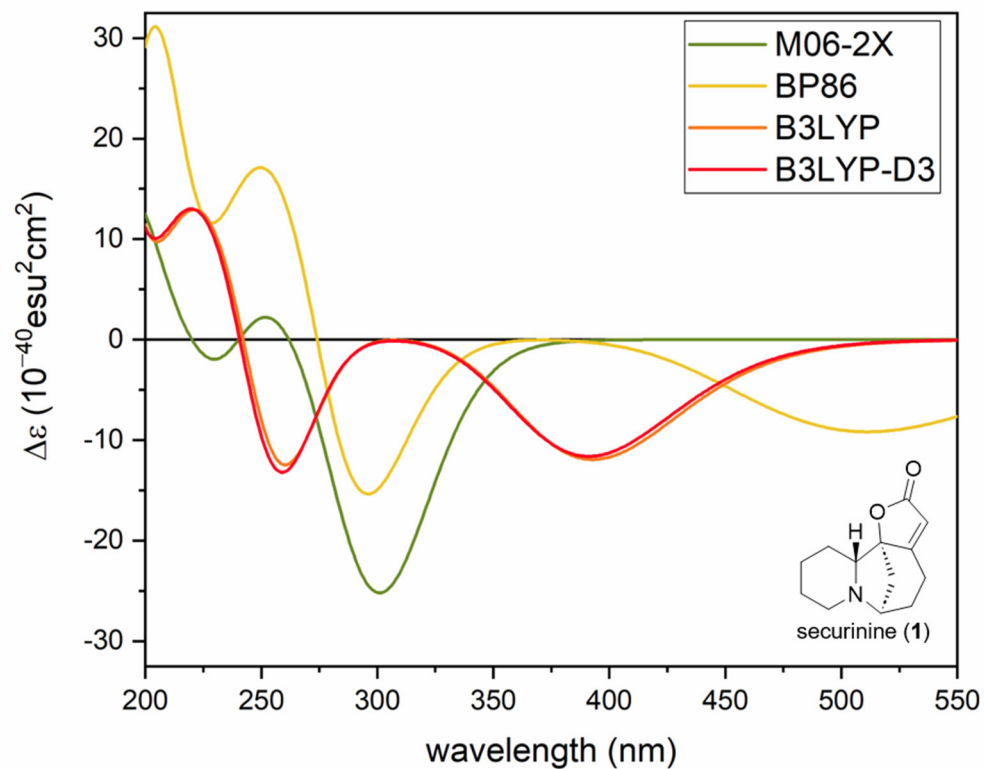

Figure S4. Simulated ECD spectra of 1 with various functionals.

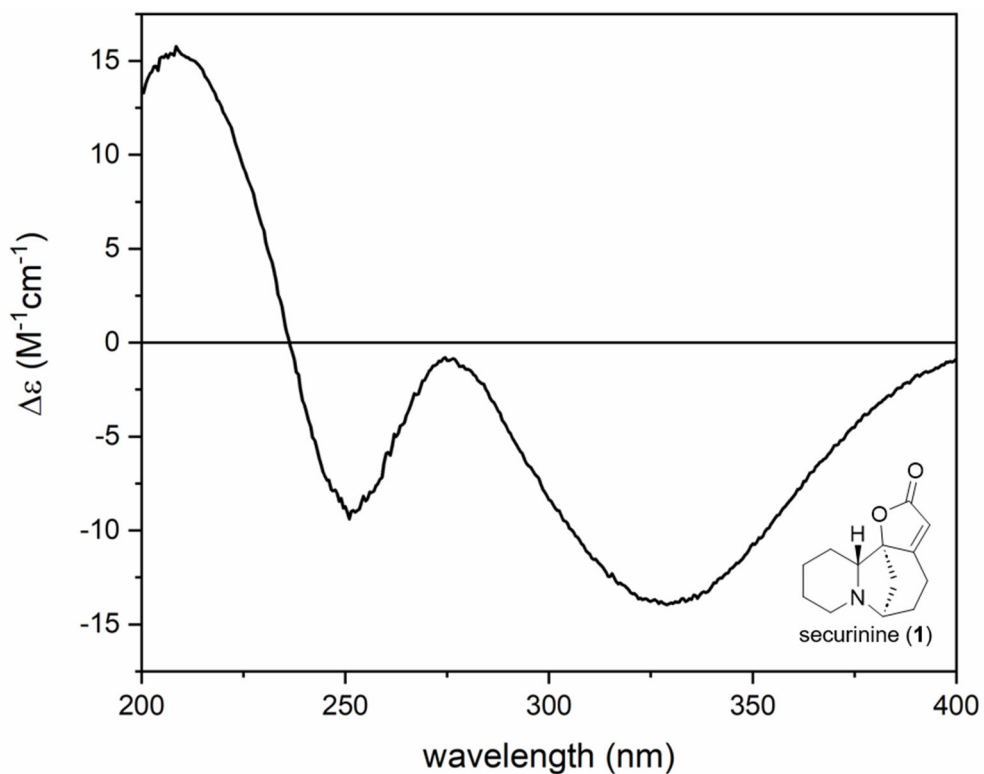

Figure S5. The experimental ECD spectrum of 1.

### *Note*

Since excitation energies are significantly underestimated, BP86 functional was excluded.

Employing the M06-2X functional for simulating the UV/Vis spectrum yields a major band at 242 nm ( $\epsilon = \sim 20,000 \text{ M}^{-1}\text{cm}^{-1}$ ) and a minor band at 301 nm ( $\epsilon = \sim 3,500 \text{ M}^{-1}\text{cm}^{-1}$ ), which closely resembles the actual system (Figure S8). However, the ECD spectrum exhibits zero intensity at 242 nm (Figure S4), a marked contrast to the negative ECD band at 250 nm. (Figure S5). Given the prioritization of ECD analyses over excitation energies within the context of our manuscript, we opted for B3LYP functional, which effectively simulates ECD patterns despite possibilities of energy underestimation.

Lastly, dispersion correction does not seem to have significant effects.



#### 4. Computational Studies of the Originally Proposed Suffruticosine (10)

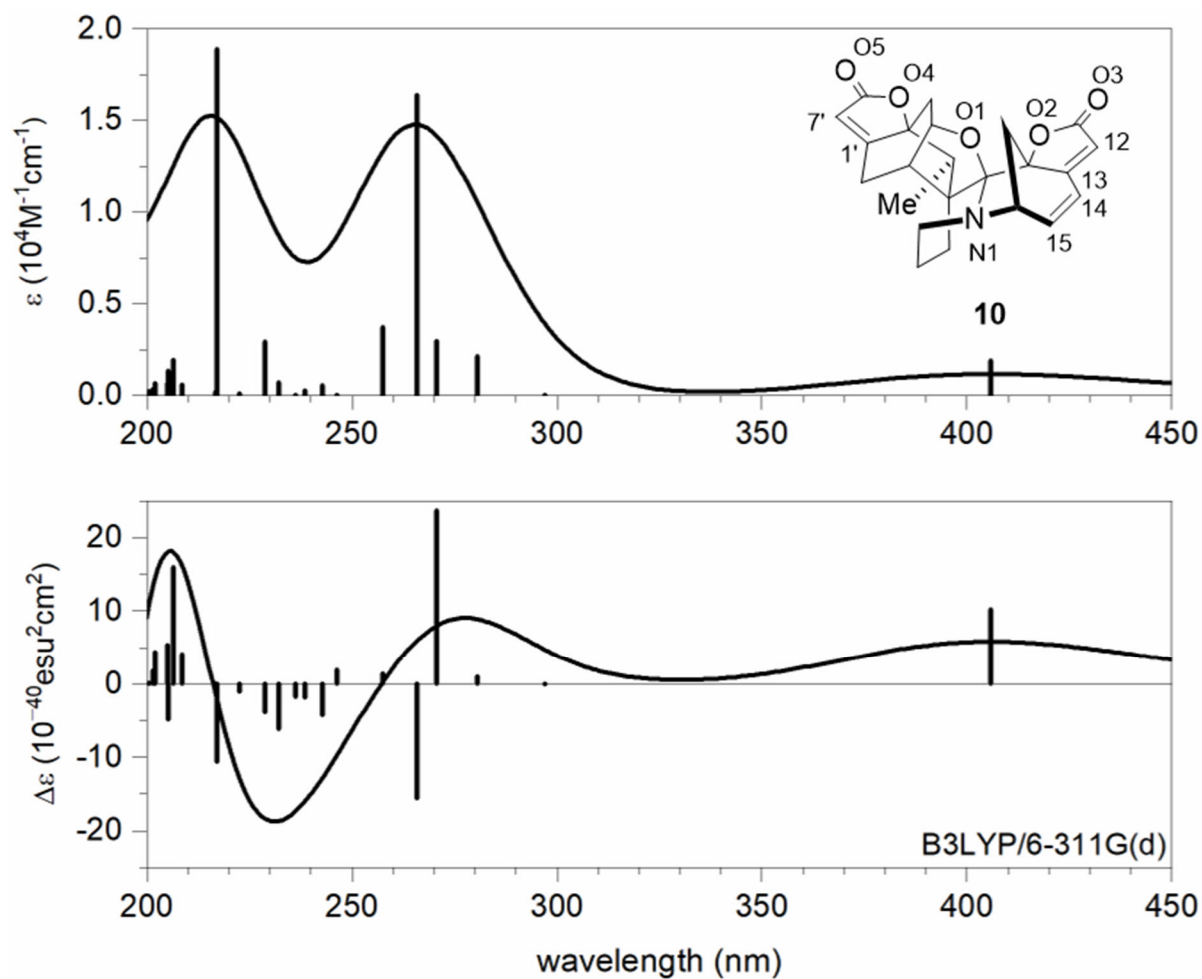

**Figure S6.** Calculated absorption and ECD spectrum of the originally proposed suffruticosine (**10**).

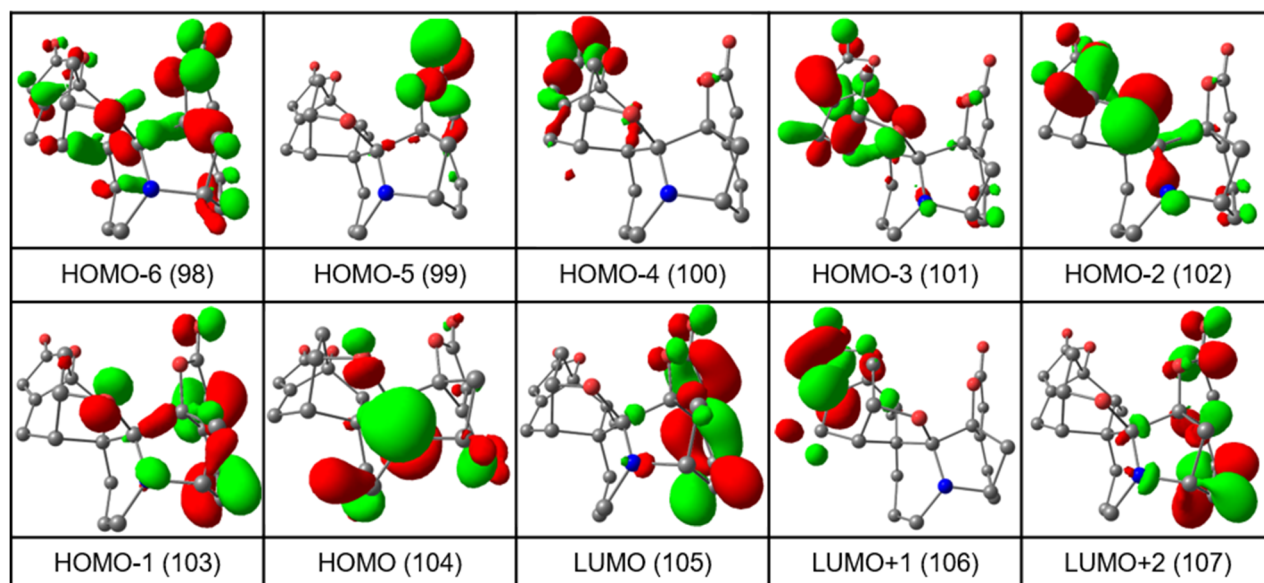

**Figure S7.** Molecular orbitals of the originally proposed suffruticosine (**10**) (contour value = 0.05).

| Wavelength (nm) | Oscillator Strength | Rotatory Strength | Contributions                                                                                 | Assignments & notes                                                                               |
|-----------------|---------------------|-------------------|-----------------------------------------------------------------------------------------------|---------------------------------------------------------------------------------------------------|
| <b>405.84</b>   | <b>0.0283</b>       | <b>30.7645</b>    | <b>98.3% H → L</b>                                                                            | <b>N1 → π*(O2,O3-C15)</b>                                                                         |
| 297.15          | 0.0002              | -0.2275           | 99.7% H → L+1                                                                                 |                                                                                                   |
| 280.54          | 0.0320              | 2.9409            | 64.5% H-2 → L, 26.2% H-1 → L, 6.86% H-3 → L                                                   | O1 → π*(O2,O3-C15) (major)<br>π(O2,O3-C15) → π*(O2,O3-C15) (minor)                                |
| <b>270.68</b>   | <b>0.0446</b>       | <b>71.0856</b>    | <b>78.4% H-5 → L, 13.9% H-1 → L, 2.70% H-6 → L</b>                                            | <b>O3 → π*(O2,O3-C15) (carbonyl n→π*)</b>                                                         |
| <b>265.77</b>   | <b>0.2457</b>       | <b>-46.7742</b>   | <b>51.1% H-1 → L, 30.7% H-2 → L, 12.2% H-5 → L, 2.04% H-6 → L</b>                             | <b>π(O2,O3-C15) → π*(O2,O3-C15) (major)</b><br><b>O1 → π*(O2,O3-C15) (minor)</b>                  |
| 257.51          | 0.0557              | 4.1056            | 87.4% H-3 → L, 5.44% H-1 → L, 2.40% H-6 → L, 2.24% H-2 → L                                    | π(O4,O5-C1') → π*(O2,O3-C15) (western to eastern)                                                 |
| 246.29          | 0.0005              | 5.6278            | 77.3% H-4 → L+1, 6.46% H-2 → L+1, 5.27% H-4 → L, 5.23% H-1 → L+1                              | O5 → π*(O4,O5-C1') (carbonyl n→π*)                                                                |
| <b>242.73</b>   | <b>0.0083</b>       | <b>-12.8213</b>   | <b>48.9% H-6 → L, 38.8% H-4 → L, 2.87% H-3 → L, 2.60% H-4 → L+1</b>                           | <b>O2, O3 σ bonding → π*(O2,O3-C15)</b><br><b>O5 → π*(O2,O3-C15) (western C=O n → eastern π*)</b> |
| 238.55          | 0.0043              | -5.5610           | 53.2% H-4 → L, 36.5% H-6 → L, 2.36% H-5 → L                                                   |                                                                                                   |
| 236.22          | 0.0005              | -5.1600           | 79.8% H-1 → L+1, 10.9% H-4 → L+1, 6.81% H-2 → L+1                                             | π(O2,O3-C15) → π*(O4,O5-C1')                                                                      |
| <b>232.18</b>   | <b>0.0107</b>       | <b>-18.2685</b>   | <b>93.8% H → L+2, 2.70% H-6 → L</b>                                                           | <b>N1 → π*(O2,O3-C15)</b>                                                                         |
| <b>228.82</b>   | <b>0.0438</b>       | <b>-11.5967</b>   | <b>77.4% H-2 → L+1, 11.9% H-1 → L+1, 4.17% H-3 → L+1, 2.87% H-4 → L+1, 2.47% H-6 → L+1</b>    | <b>O1 → π*(O4,O5-C1')</b>                                                                         |
| 222.53          | 0.0016              | -3.2096           | 95.8% H-7 → LUMO                                                                              |                                                                                                   |
| 216.99          | 0.2832              | -31.7565          | 85.7% H-3 → L+1, 4.39% H-2 → L+1, 3.60% H-7 → L+1                                             | π(O4,O5-C1') → π*(O4,O5-C1') (western π → π*)                                                     |
| 216.65          | 0.0028              | -1.3779           | 82.9% H-8 → L, 8.64% H-12 → L                                                                 |                                                                                                   |
| 208.55          | 0.0085              | 12.2926           | 93.7% H-9 → L                                                                                 |                                                                                                   |
| 206.51          | 0.0291              | 47.8898           | 42.8% H-5 → L+1, 37.5% H-6 → L+1, 5.09% H-8 → L+1, 3.31% H-7 → L+1, 2.05% H-9 → L+1           |                                                                                                   |
| 205.26          | 0.0203              | -14.388           | 30.0% H-10 → L, 28.0% H-12 → L, 17.7% H-11 → L, 7.23% H → L+3, 7.06% H-8 → L, 3.82% H-1 → L+2 |                                                                                                   |

**Table S1.** Excitation energies (wavelength in nm), oscillator strength, rotatory strength (velocity) and orbital contributions of each excited state of the originally reported suffruticosine (**10**). Excitation energies over 205 nm were only included. Bold transitions were mentioned in the text. H: HOMO, L: LUMO

## 5. Absorption and Electronic Circular Dichroism (ECD) Spectra of securinine (1) and allosecurinine (14)

### 5.1 Securinine (1)

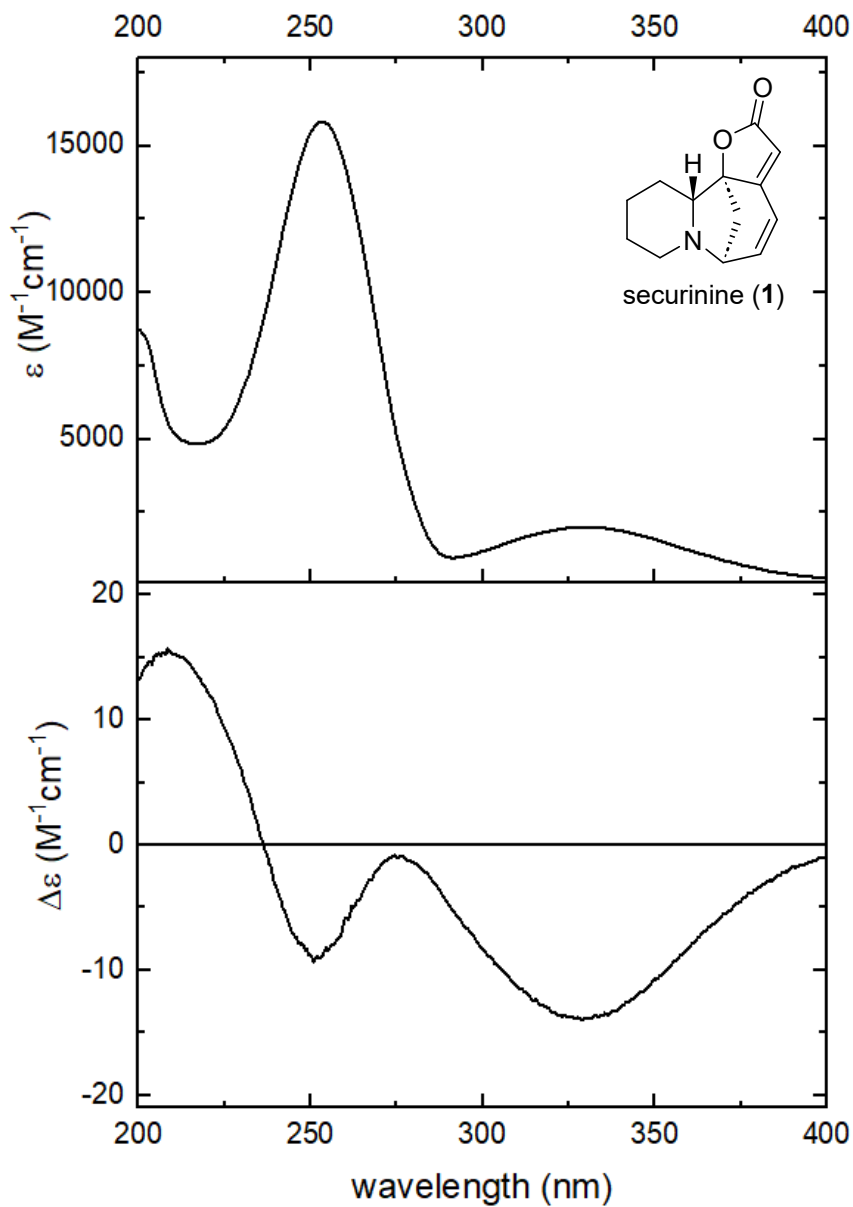

**Figure S8.** UV/Vis and ECD spectra of securinine (1) in acetonitrile.

UV  $\lambda_{max}$  ( $\log \epsilon$ , MeCN) 253.5 (4.20), 331 (3.30) ( $\lambda_{max}$ : nm,  $\epsilon$ :  $M^{-1}cm^{-1}$ )

ECD  $\lambda_{max}$  ( $\Delta\epsilon$ , MeCN) 208.5 (+15.8) 251 (-9.38) 275.5 (-0.95) 329 (-13.9) ( $\lambda_{max}$ : nm,  $\Delta\epsilon$ :  $M^{-1}cm^{-1}$ )

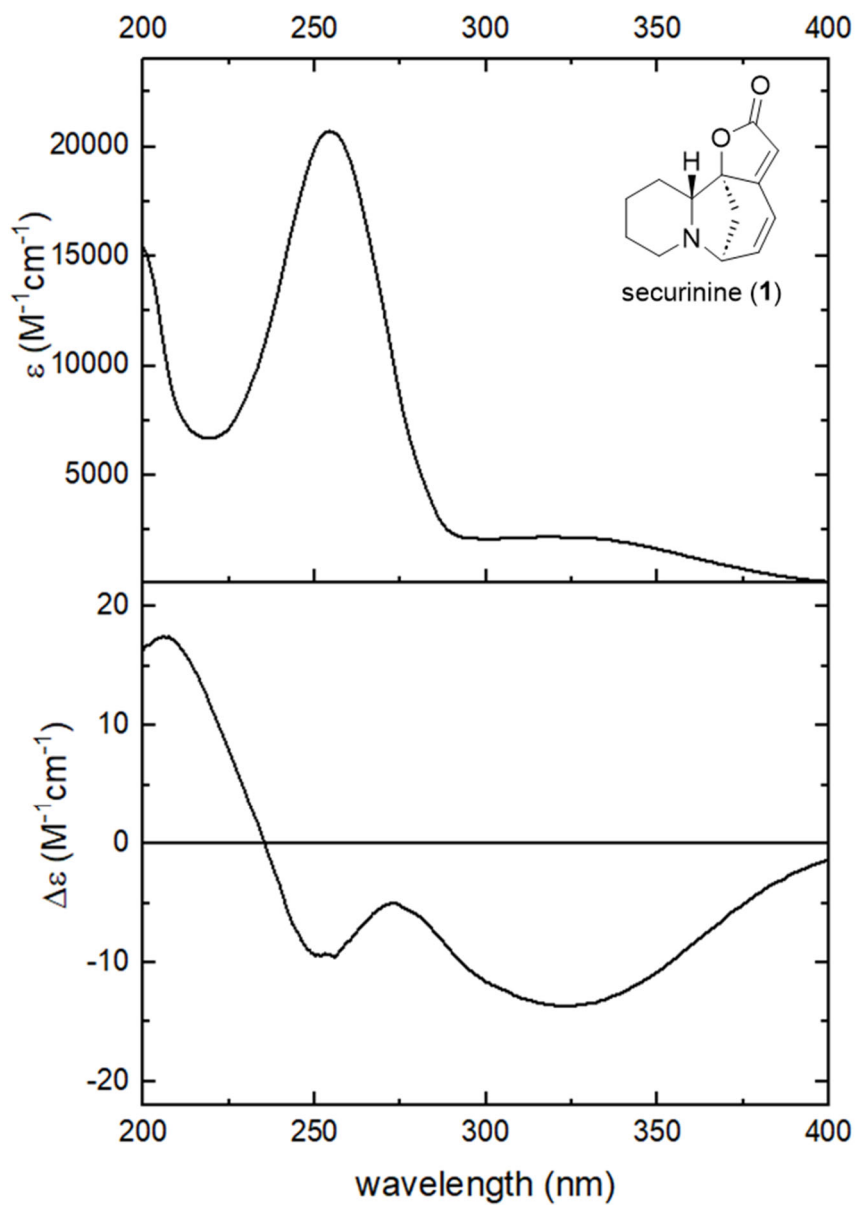

**Figure S9.** UV/Vis and ECD spectra of securinine (**1**) in methanol.

UV  $\lambda_{\max}$  (log  $\epsilon$ , MeOH) 254.5 (4.32), 324 (3.34) ( $\lambda_{\max}$ : nm,  $\epsilon$ :  $M^{-1}cm^{-1}$ )

ECD  $\lambda_{\max}$  ( $\Delta\epsilon$ , MeOH) 206 (+17.5) 251.5 (-9.41) 272.5 (-4.97) 323 (-13.7) ( $\lambda_{\max}$ : nm,  $\Delta\epsilon$ :  $M^{-1}cm^{-1}$ )

## 5.2 Allosecurinine (14)

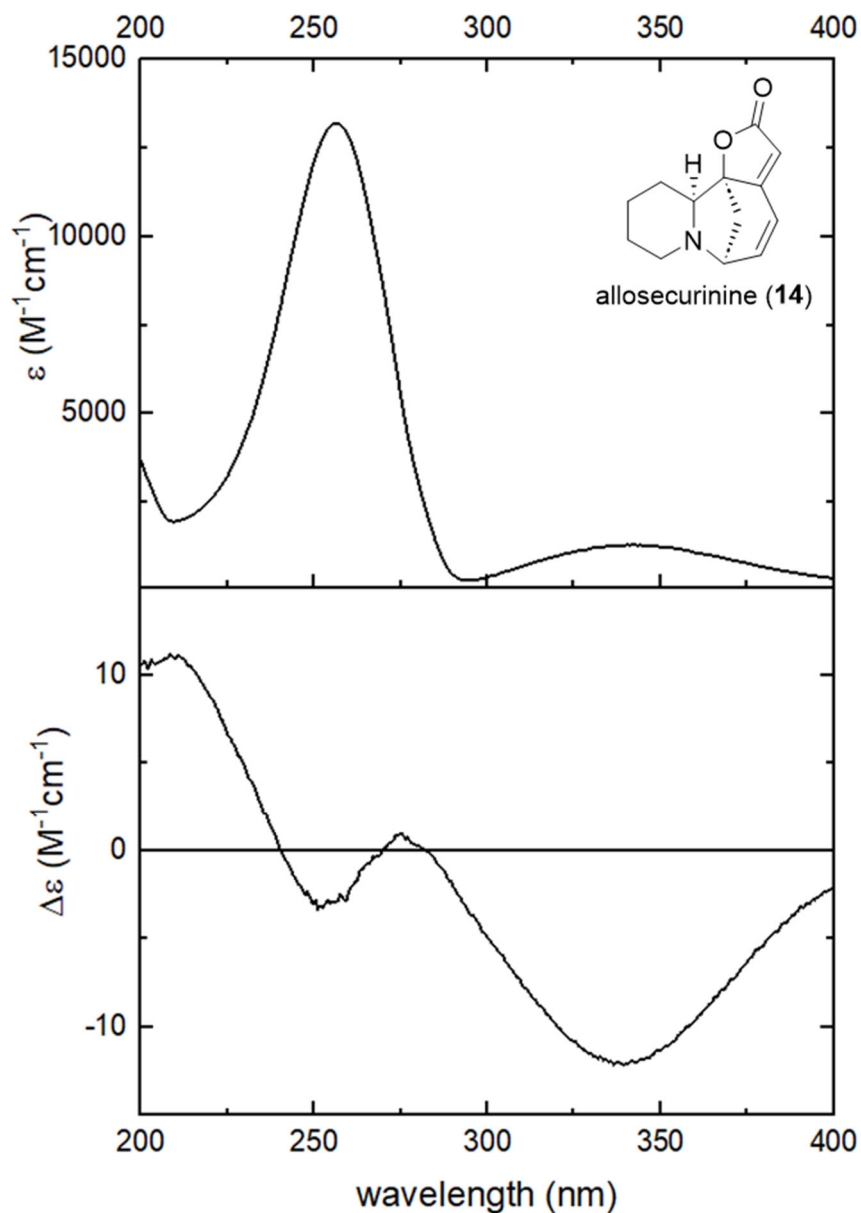

**Figure S10.** Absorption and ECD spectra of allosecurinine (14) in acetonitrile.

UV  $\lambda_{\max}$  ( $\log \epsilon$ , MeCN) 256.5 (4.12), 342 (3.11) ( $\lambda_{\max}$ : nm,  $\epsilon$ :  $M^{-1}cm^{-1}$ )

ECD  $\lambda_{\max}$  ( $\Delta\epsilon$ , MeCN) 208 (11.03) 251 (-3.33), 275 (+0.95), 339.5 (-12.15) ( $\lambda_{\max}$ : nm,  $\Delta\epsilon$ :  $M^{-1}cm^{-1}$ )

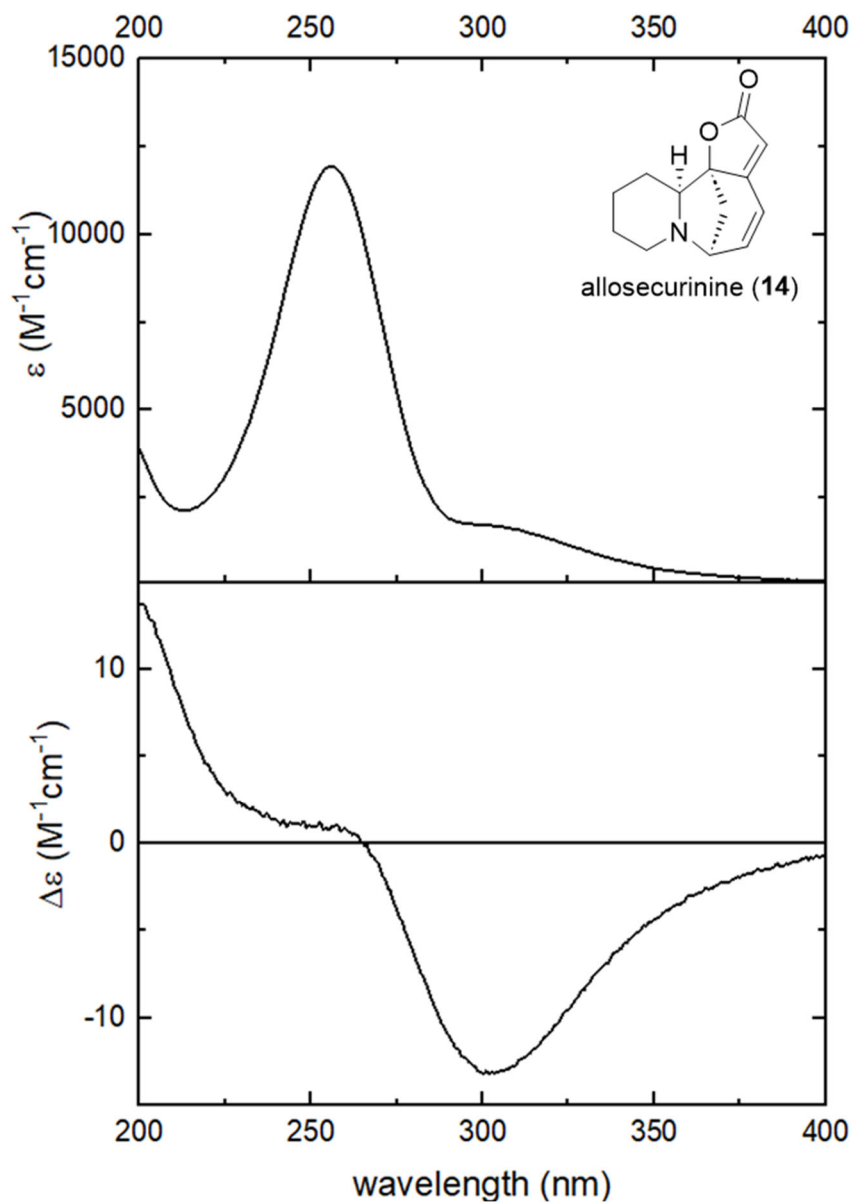

**Figure S11.** Absorption and ECD spectra of allosecurinine (**14**) in methanol.

UV  $\lambda_{\max}$  (log  $\epsilon$ , MeOH) 256 (4.08), 302 (3.24) ( $\lambda_{\max}$ : nm,  $\epsilon$ :  $M^{-1}cm^{-1}$ )

ECD  $\lambda_{\max}$  ( $\Delta\epsilon$ , MeOH) 302 (-13.2) ( $\lambda_{\max}$ : nm,  $\Delta\epsilon$ :  $M^{-1}cm^{-1}$ )

*Note:*

The disappearance of the negative ECD band around 250 nm is presumed to be a result of the hydrogen bonding effect involving the nitrogen atom. This effect is consistent with the findings reported in the previous literature<sup>13</sup>, which stated that protonated allosecurinine exhibited a single negative band.

## 6. Computational Studies of Securinine (1)

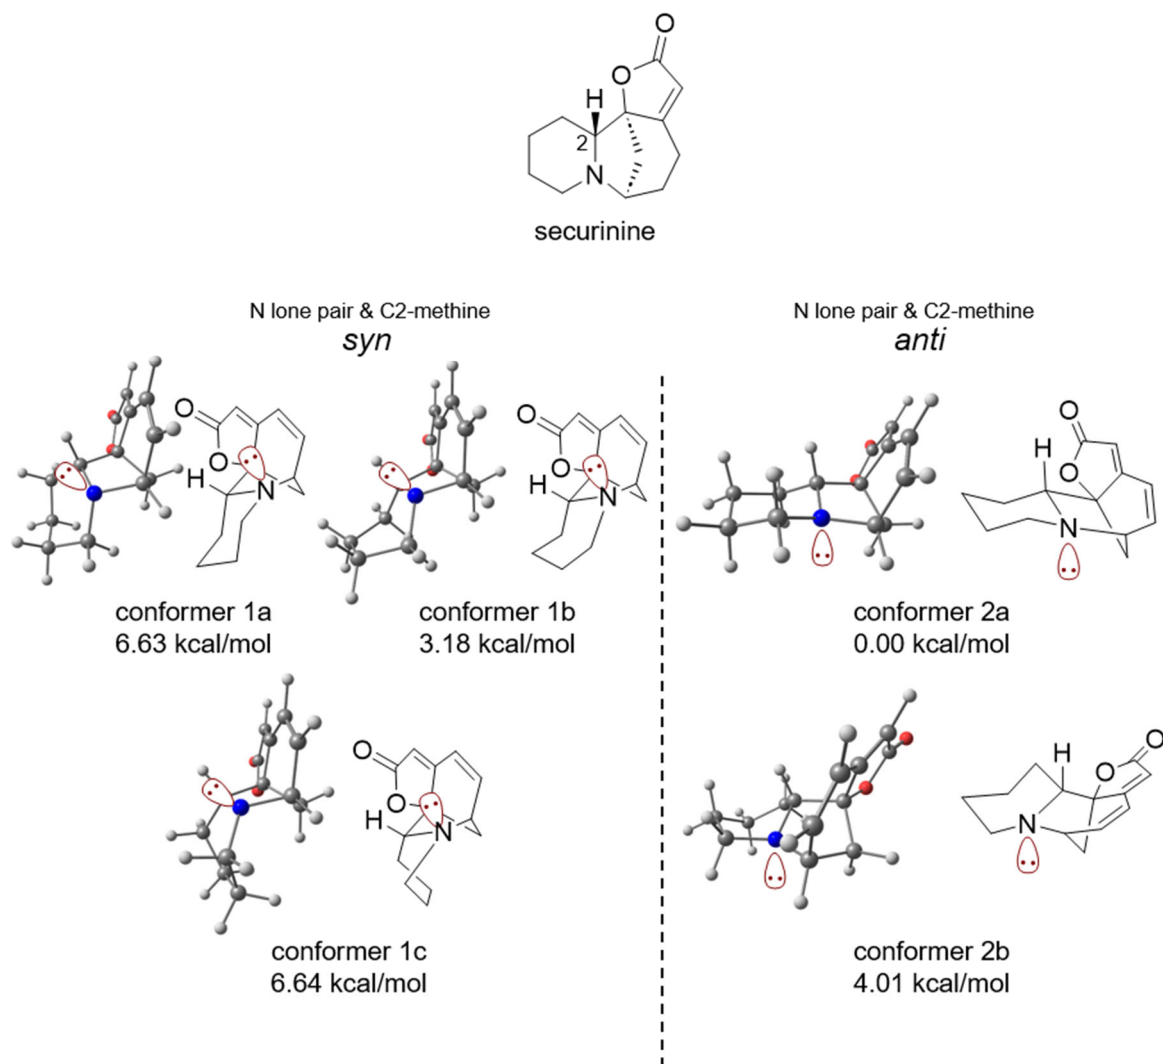

**Figure S12.** Conformers of securinine (1) with relative free energies.

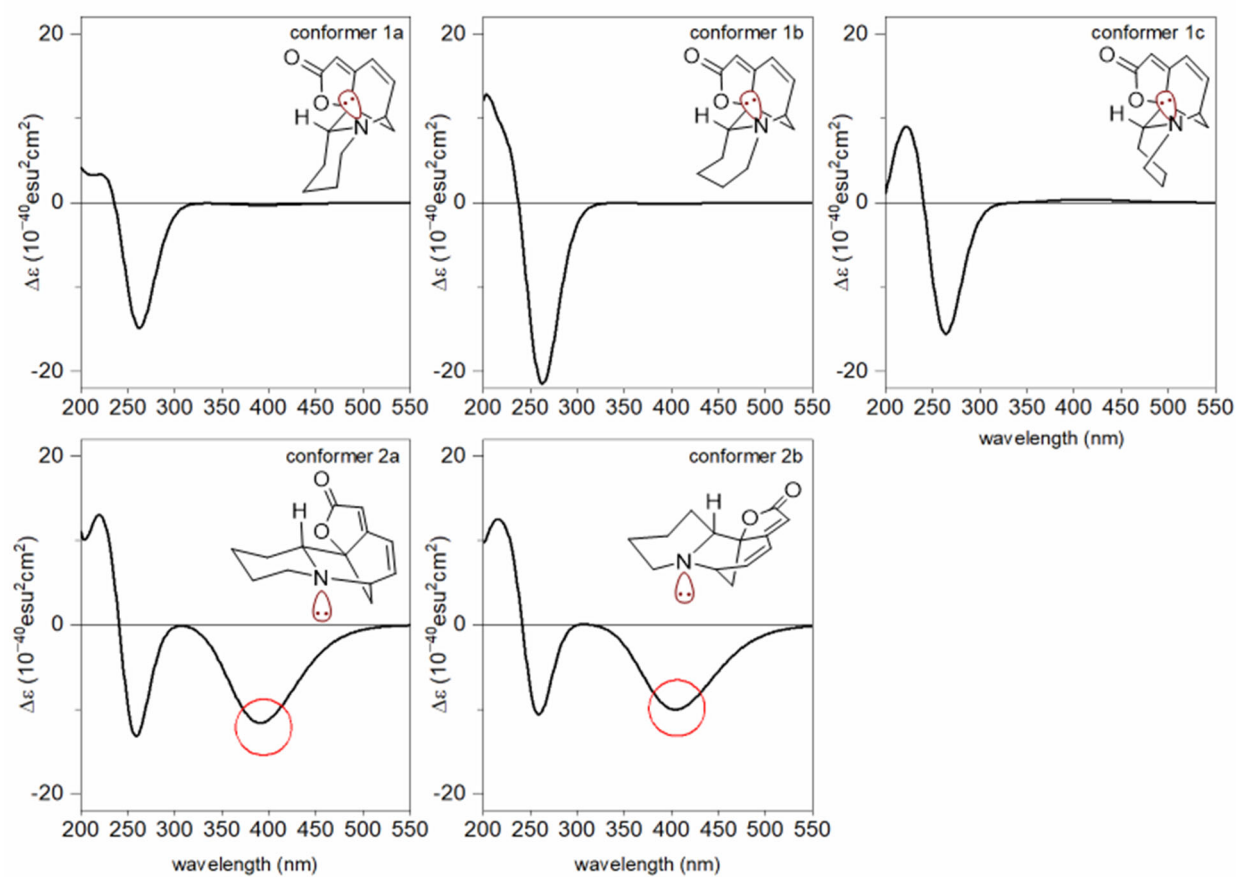

**Figure S13.** Computed ECD spectra of all conformers of securinine (**1**).



### 6.1 Conformer 1a, securinine

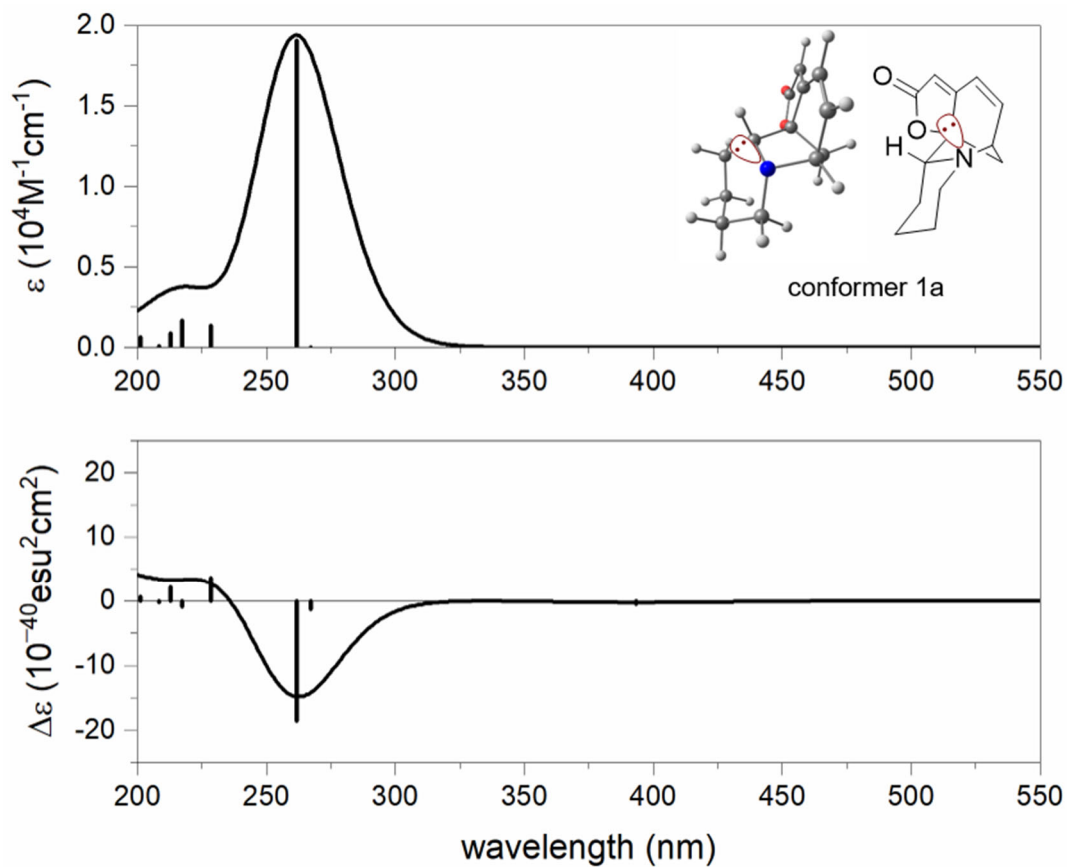

**Figure S14.** Calculated absorption and ECD spectra of conformer 1a, securinine.

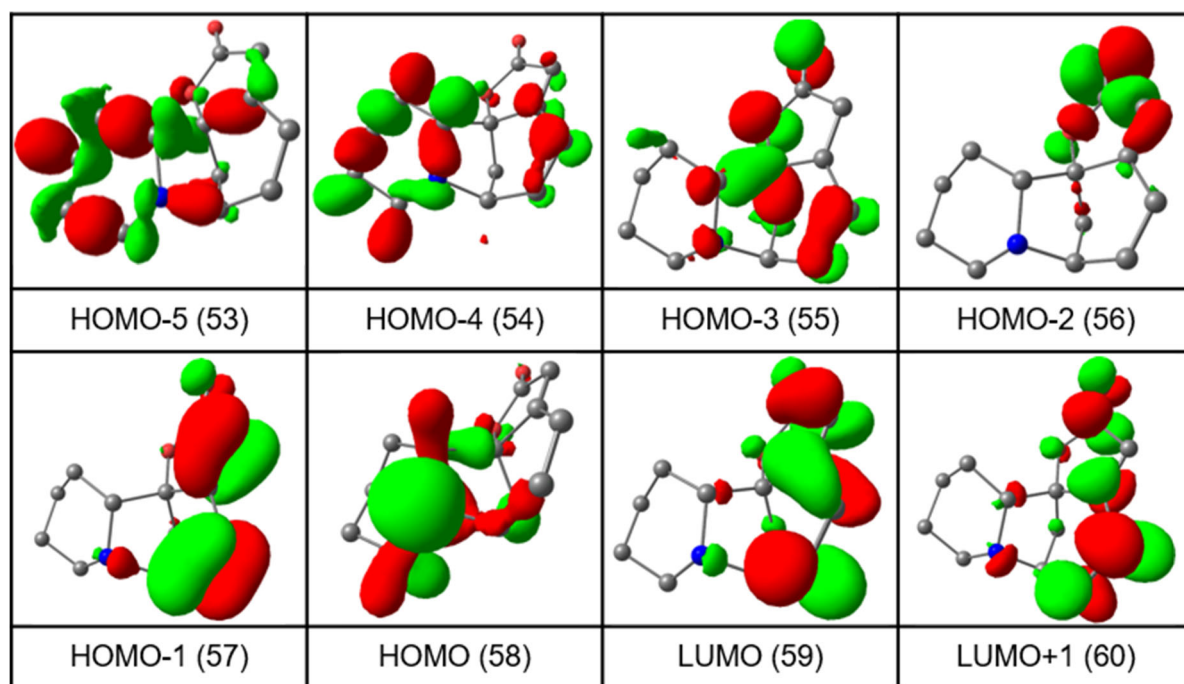

**Figure S15.** Molecular orbitals of conformer 1a, securinine (contour value = 0.05).

| Wavelength (nm) | Oscillator Strength | Rotatory Strength | Contributions                                                                                  | Assignments & notes                                                        |
|-----------------|---------------------|-------------------|------------------------------------------------------------------------------------------------|----------------------------------------------------------------------------|
| <b>393.46</b>   | <b>0.0006</b>       | <b>-1.4365</b>    | <b>99.6% H → L</b>                                                                             | <b>Nitrogen lone pair → π*, diminished band intensity in Abs &amp; ECD</b> |
| 267.27          | 0.0001              | -3.5225           | 96.5% H-2 → L, 2.48% H-2 → L+1                                                                 |                                                                            |
| <b>261.76</b>   | <b>0.4765</b>       | <b>-48.274</b>    | <b>97.0% H-1 → L</b>                                                                           | <b>π → π*, major absorption</b>                                            |
| 228.52          | 0.0344              | 9.5302            | 92.7% H-3 → L                                                                                  |                                                                            |
| 217.29          | 0.0419              | -2.2955           | 96.8% H → L+1                                                                                  |                                                                            |
| 212.97          | 0.0217              | 5.7159            | 54.6% H-5 → L, 20.0% H-7 → L,<br>10.3% H-6 → L, 6.58% H-8 → L,<br>3.74% H-4 → L, 2.97% H-3 → L |                                                                            |
| 208.35          | 0.0023              | -0.6217           | 91.9% H-4 → L, 2.11% H-1 → L+1                                                                 |                                                                            |
| 201.22          | 0.0165              | 1.7296            | 40.4% H-6 → L, 36.4% H-5 → L,<br>16.8% H-7 → L, 2.53% H-8 → L                                  |                                                                            |

**Table S2.** Excitation energies (wavelength in nm), oscillator strength, rotatory strength (velocity) and orbital contributions of each excited state of conformer 1a, securinine. Excitation energies over 200 nm were only included. H: HOMO, L: LUMO.

## 6.2 Conformer 1b, securinine

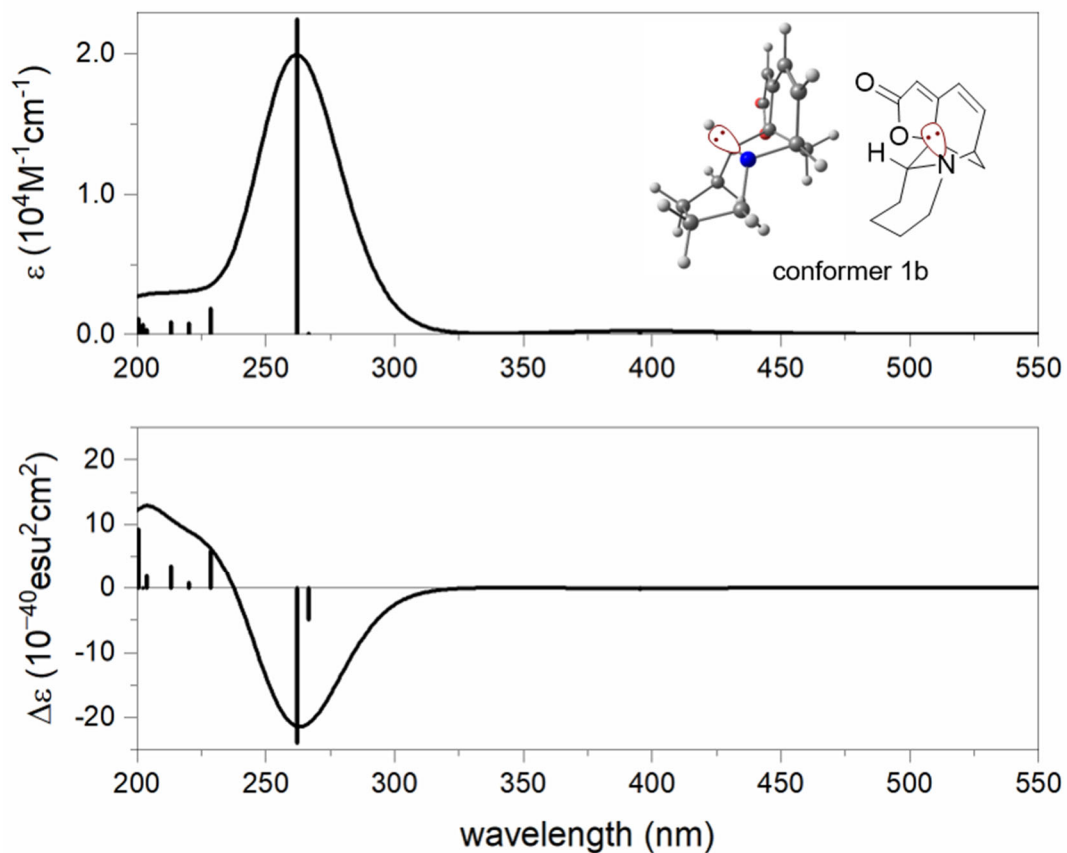

**Figure S16.** Calculated absorption and ECD spectra of conformer 1b, securinine.

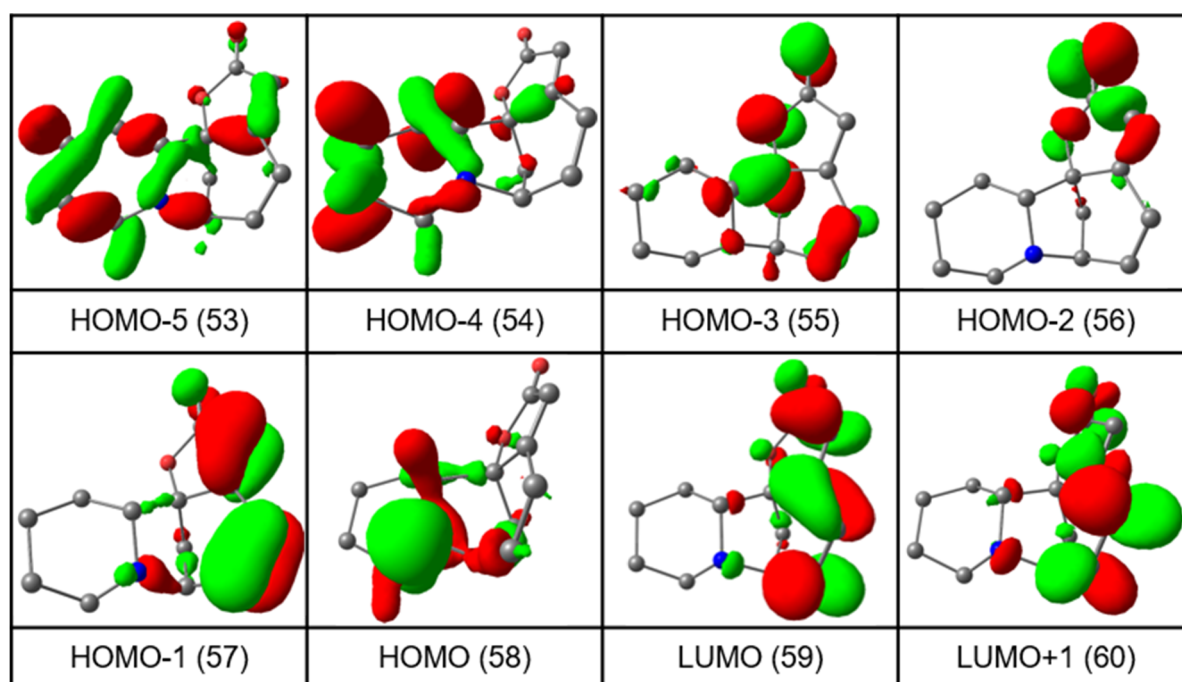

**Figure S17.** Molecular orbitals of conformer 1b, securinine (contour value = 0.05).

| Wavelength (nm) | Oscillator Strength | Rotatory Strength | Contributions                                                                   | Assignments & notes                                                        |
|-----------------|---------------------|-------------------|---------------------------------------------------------------------------------|----------------------------------------------------------------------------|
| <b>395.17</b>   | <b>0.0057</b>       | <b>-0.5603</b>    | <b>99.4% H → L</b>                                                              | <b>Nitrogen lone pair → π*, diminished band intensity in Abs &amp; ECD</b> |
| 266.51          | 0.0013              | -12.8118          | 96.2% H-2 → L, 2.43% H-2 → L+1                                                  |                                                                            |
| <b>262.14</b>   | <b>0.4892</b>       | <b>-62.2657</b>   | <b>96.7% H-1 → L</b>                                                            | <b>π → π*, major absorption</b>                                            |
| 228.61          | 0.0404              | 15.2227           | 91.9% H-3 → L, 3.03% H → L+1                                                    |                                                                            |
| 220.11          | 0.0172              | 2.0227            | 92.7% H → L+1, 3.66% H-3 → L                                                    |                                                                            |
| 213.24          | 0.0191              | 8.931             | 49.6% H-4 → L, 16.6% H-5 → L,<br>13.6% H-7 → L, 7.84% H-8 → L,<br>7.37% H-6 → L |                                                                            |
| 203.91          | 0.0071              | 4.8365            | 58.1% H-5 → L, 35.1% H-4 → L                                                    |                                                                            |
| 202.41          | 0.0151              | -0.0390           | 95.9% H → L+2                                                                   |                                                                            |
| 200.64          | 0.0245              | 23.9773           | 68.5% H-6 → L, 14.3% H-5 → L,<br>5.94% H-4 → L, 4.14% H-7 → L,<br>2.25% H → L+2 |                                                                            |

**Table S3.** Excitation energies (wavelength in nm), oscillator strength, rotatory strength (velocity) and orbital contributions of each excited state of conformer 1b, securinine. Excitation energies over 200 nm were only included. H: HOMO, L: LUMO.

### 6.3 Conformer 1c, securinine

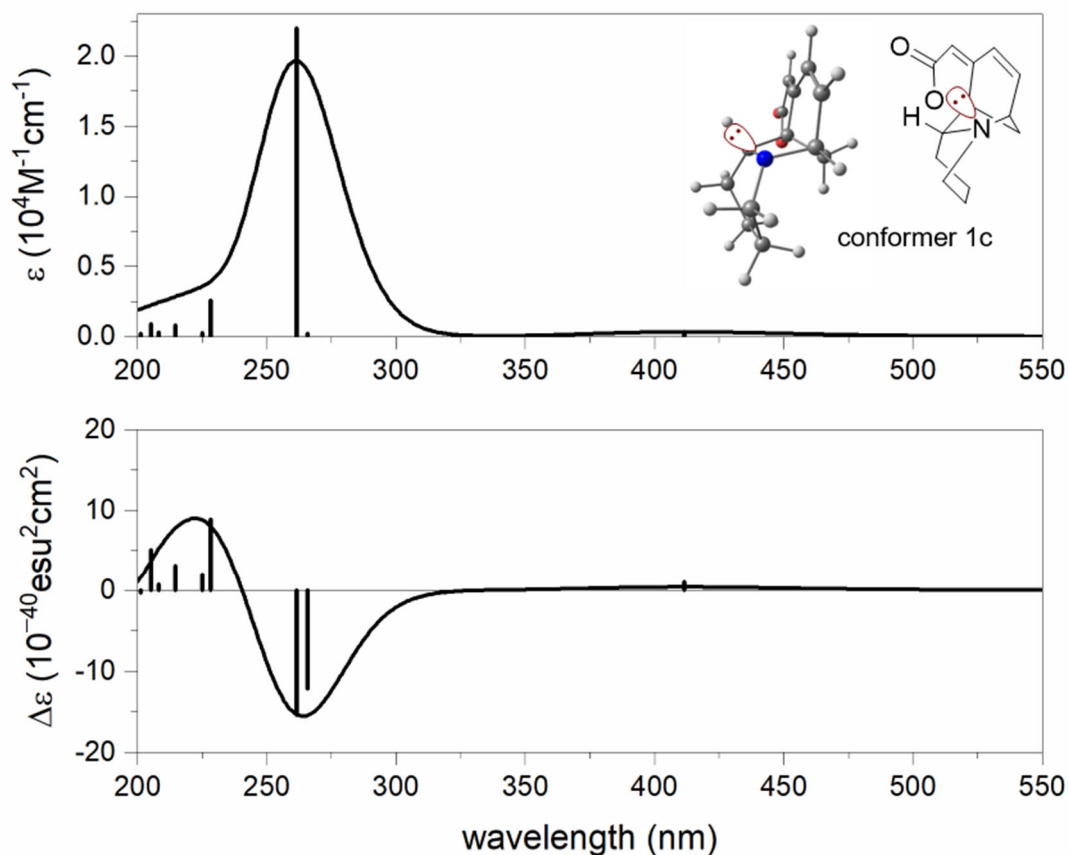

**Figure S18.** Calculated absorption and ECD spectra of conformer 1c, securinine.

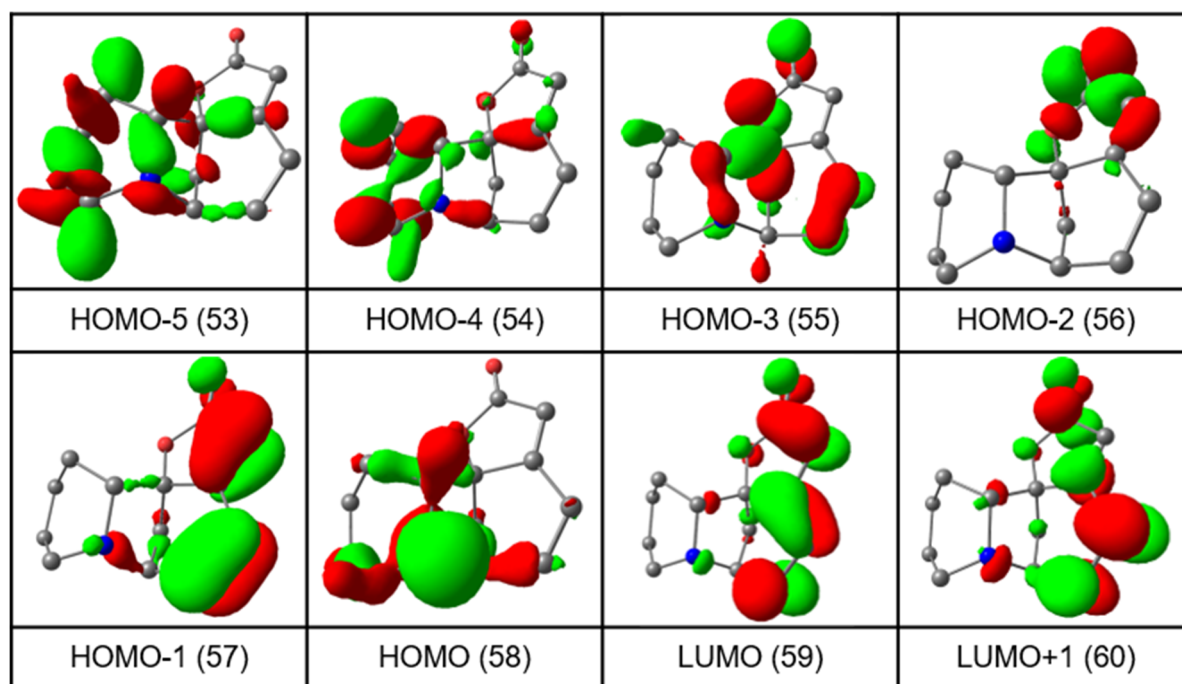

**Figure S19.** Molecular orbitals of conformer 1c, securinine (contour value = 0.05).

| Wavelength (nm) | Oscillator Strength | Rotatory Strength | Contributions                                                             | Assignments & notes                                                        |
|-----------------|---------------------|-------------------|---------------------------------------------------------------------------|----------------------------------------------------------------------------|
| <b>411.51</b>   | <b>0.0079</b>       | <b>2.0728</b>     | <b>99.4% H → L</b>                                                        | <b>Nitrogen lone pair → π*, diminished band intensity in Abs &amp; ECD</b> |
| 265.85          | 0.0051              | -24.2332          | 95.4% H-2 → L, 2.48% H-2 → L+1                                            |                                                                            |
| <b>261.61</b>   | <b>0.4777</b>       | <b>-30.7691</b>   | <b>95.6% H-1 → L</b>                                                      | <b>π → π*, major absorption</b>                                            |
| 228.32          | 0.0563              | 17.7754           | 69.6% H-3 → L, 25.0% H → L+1                                              |                                                                            |
| 224.93          | 0.0055              | 3.931             | 71.3% H → L+1, 26.0% H-3 → L                                              |                                                                            |
| 214.68          | 0.0181              | 6.1847            | 35.8% H-5 → L, 30.6% H-6 → L, 23.6% H-4 → L, 2.82% H-7 → L, 2.27% H-8 → L |                                                                            |
| 208.04          | 0.0066              | 1.5358            | 98.0% H → L+2                                                             |                                                                            |
| 205.18          | 0.0191              | 10.1536           | 66.9% H-4 → L, 28.8% H-5 → L, 2.06% H-6 → L                               |                                                                            |
| 201.09          | 0.0052              | -0.6472           | 59.9% H-6 → L, 30.2% H-5 → L, 5.21% H-4 → L, 2.71% H-1 → L+1              |                                                                            |

**Table S4.** Excitation energies (wavelength in nm), oscillator strength, rotatory strength (velocity) and orbital contributions of each excited state of conformer 1c, securinine. Excitation energies over 200 nm were only included. H: HOMO, L: LUMO.

### 6.4 Conformer 2a, securinine

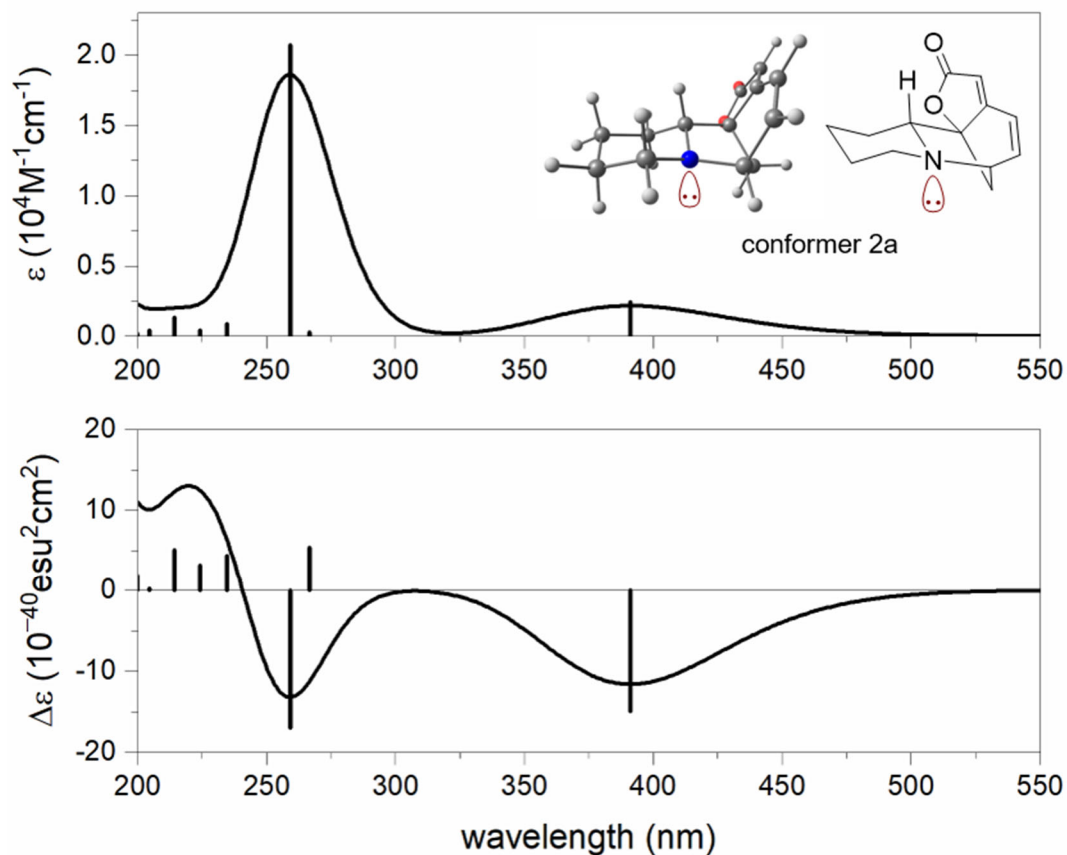

**Figure S20.** Calculated absorption and ECD spectra of conformer 2a, securinine.

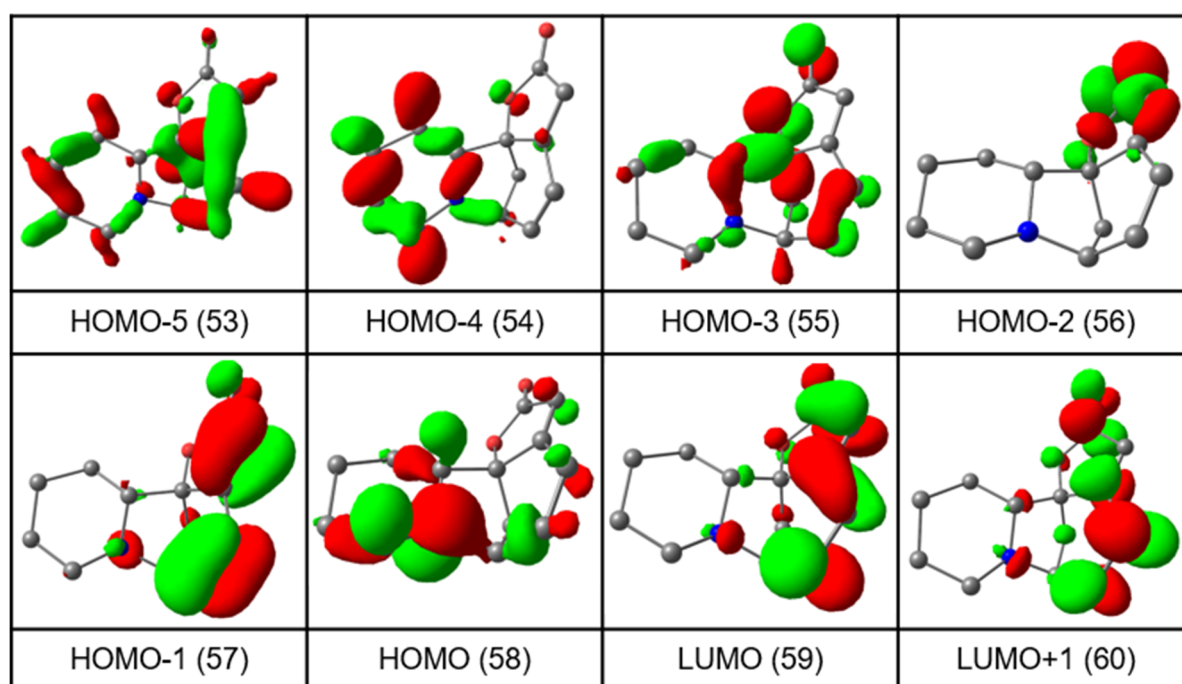

**Figure S21.** Molecular orbitals of conformer 2a, securinine (contour value = 0.05).

| Wavelength (nm) | Oscillator Strength | Rotatory Strength | Contributions                                              | Assignments & notes                              |
|-----------------|---------------------|-------------------|------------------------------------------------------------|--------------------------------------------------|
| <b>391.14</b>   | <b>0.0532</b>       | <b>-59.6583</b>   | <b>98.3% H → L</b>                                         | <b>Nitrogen lone pair → π*, minor absorption</b> |
| 266.62          | 0.0061              | 21.4521           | 94.7% H-2 → L, 2.48% H-2 → L+1                             |                                                  |
| <b>259.15</b>   | <b>0.4505</b>       | <b>-68.0437</b>   | <b>94.3% H-1 → L</b>                                       | <b>π → π*, major absorption</b>                  |
| 234.65          | 0.0188              | 17.2977           | 96.2% H-3 → L                                              |                                                  |
| 224.08          | 0.0096              | 12.4925           | 91.2% H → L+1, 4.88% H-5 → L                               |                                                  |
| 214.22          | 0.0289              | 20.1484           | 75.6% H-5 → L, 8.20% H-8 → L, 5.59% H → L+1, 4.73% H-4 → L |                                                  |
| 204.42          | 0.0093              | 0.8319            | 92.3% H-4 → L, 5.95% H-5 → L                               |                                                  |

**Table S5.** Excitation energies (wavelength in nm), oscillator strength, rotatory strength (velocity) and orbital contributions of each excited state of conformer 2a, securinine. Excitation energies over 200 nm were only included. H: HOMO, L: LUMO.



### 6.5 Conformer 2b, securinine

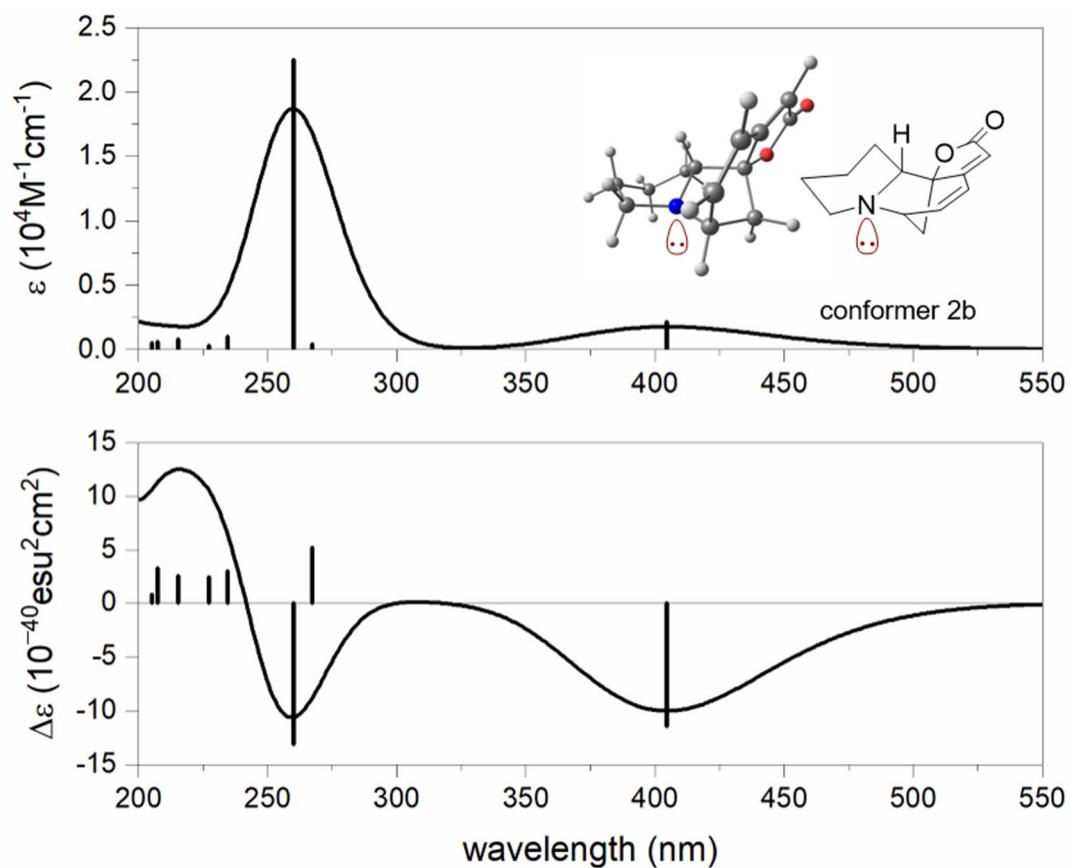

**Figure S22.** Calculated absorption and ECD spectra of conformer 2b, securinine.

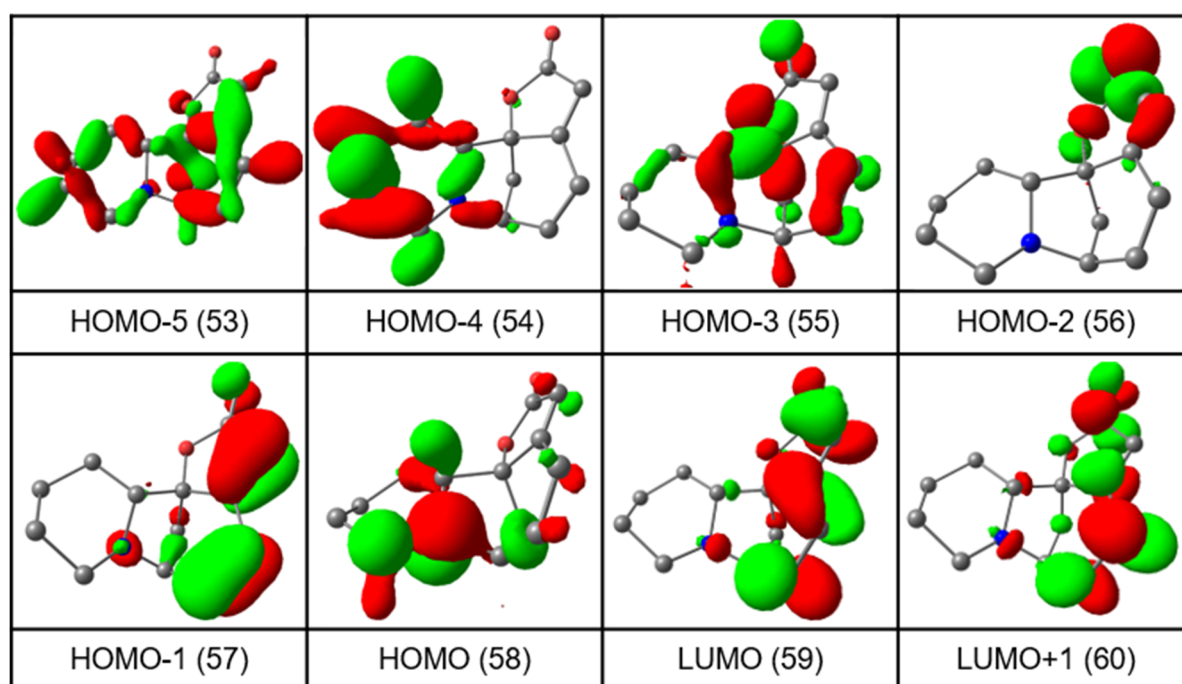

**Figure S23.** Molecular orbitals of conformer 2b, securinine (contour value = 0.05).

| Wavelength (nm) | Oscillator Strength | Rotatory Strength | Contributions                                              | Assignments & notes                              |
|-----------------|---------------------|-------------------|------------------------------------------------------------|--------------------------------------------------|
| <b>404.54</b>   | <b>0.0433</b>       | <b>-53.3006</b>   | <b>98.6% H → L</b>                                         | <b>Nitrogen lone pair → π*, minor absorption</b> |
| 267.18          | 0.0080              | 24.2926           | 94.1% H-2 → L, 2.42% H-2 → L+1, 2.23% H-1 → LUMO           |                                                  |
| <b>259.98</b>   | <b>0.4498</b>       | <b>-61.2288</b>   | <b>94.3% H-1 → L, 2.15% H-2 → L</b>                        | <b>π → π*, major absorption</b>                  |
| 234.47          | 0.0205              | 14.1433           | 94.2% H-3 → L, 2.77% H → L+1                               |                                                  |
| 227.27          | 0.0061              | 11.6466           | 92.3% H → L+1, 3.00% H-3 → L, 2.66% H-5 → L                |                                                  |
| 215.41          | 0.0166              | 12.2239           | 84.2% H-5 → L, 4.78% H-8 → L, 3.11% H-7 → L, 3.06% H → L+1 |                                                  |
| 207.34          | 0.0122              | 15.4416           | 95.9% H-4 → L                                              |                                                  |
| 205.27          | 0.0103              | 3.6572            | 95.1% H → L+2                                              |                                                  |

**Table S6.** Excitation energies (wavelength in nm), oscillator strength, rotatory strength (velocity) and orbital contributions of each excited state of conformer 2b, securinine. Excitation energies over 200 nm were only included. H: HOMO, L: LUMO.

## 7. Computational Studies of Allosecurinine (14)

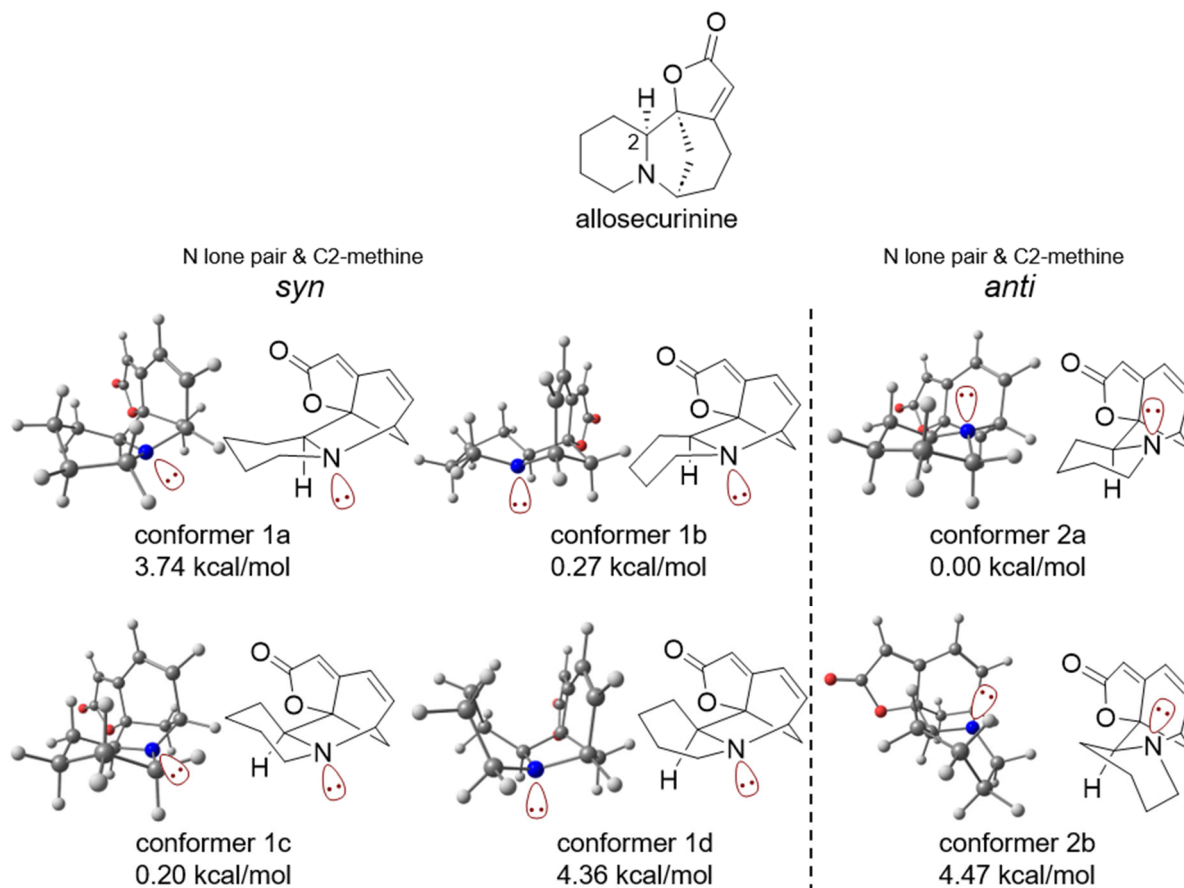

**Figure S24.** Conformers of allosecurinine (**14**) with relative free energies.

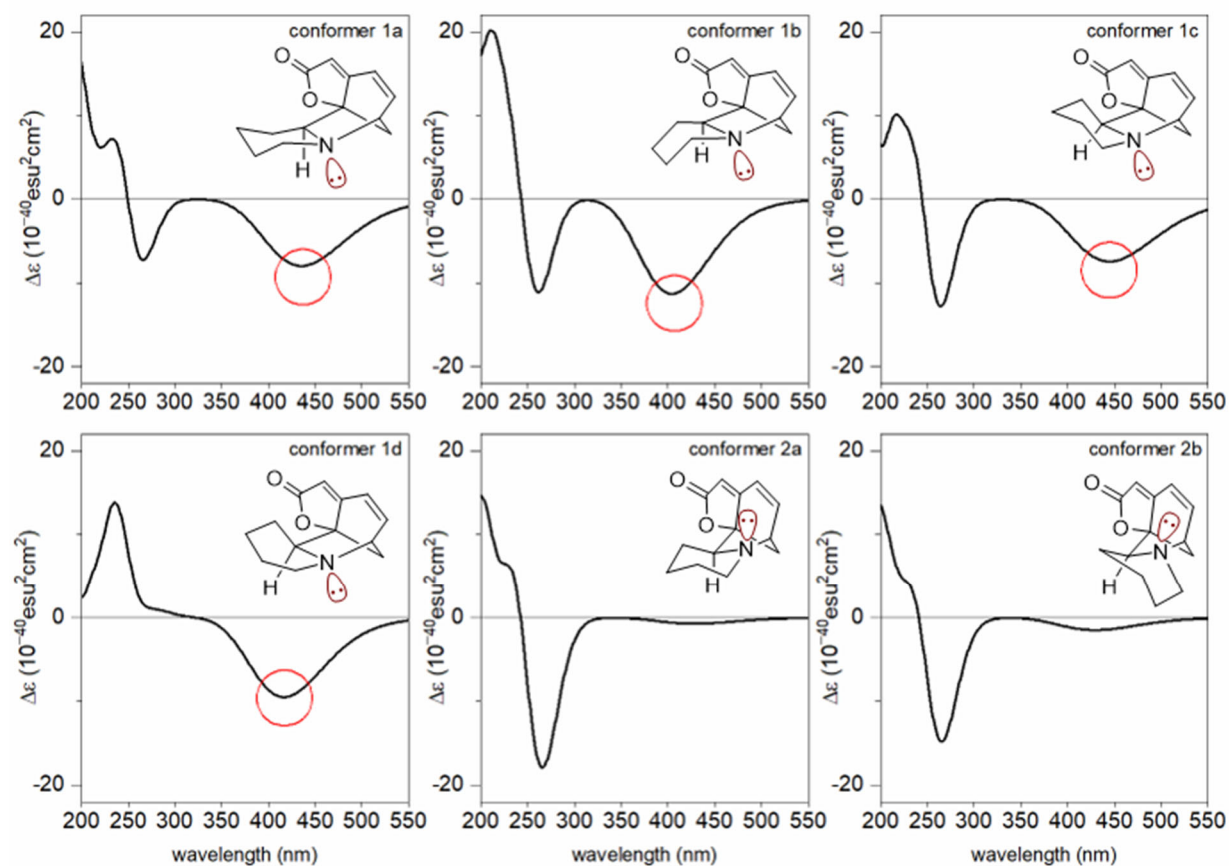

**Figure S25.** Computed ECD spectra of all conformers of allosecurinine (**14**).

### 7.1 Conformer 1a, allosecurinine

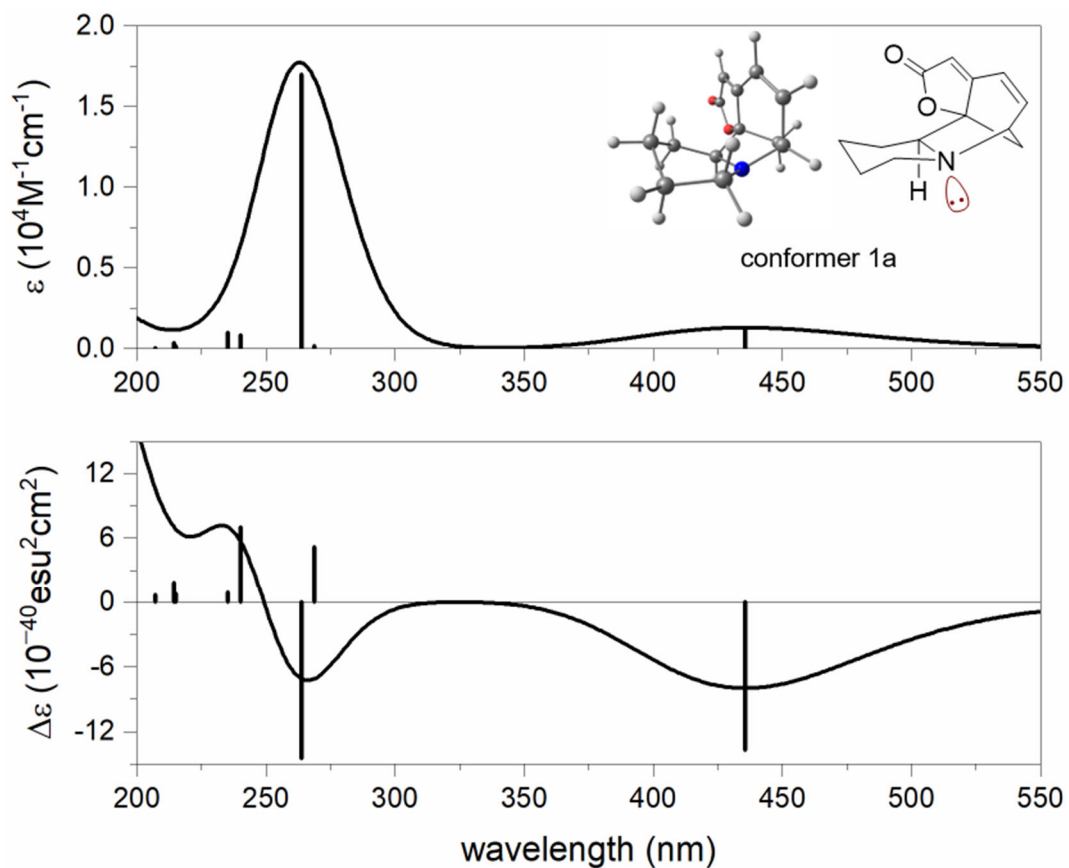

**Figure S26.** Calculated absorption and ECD spectra of conformer 1a, allosecurinine.

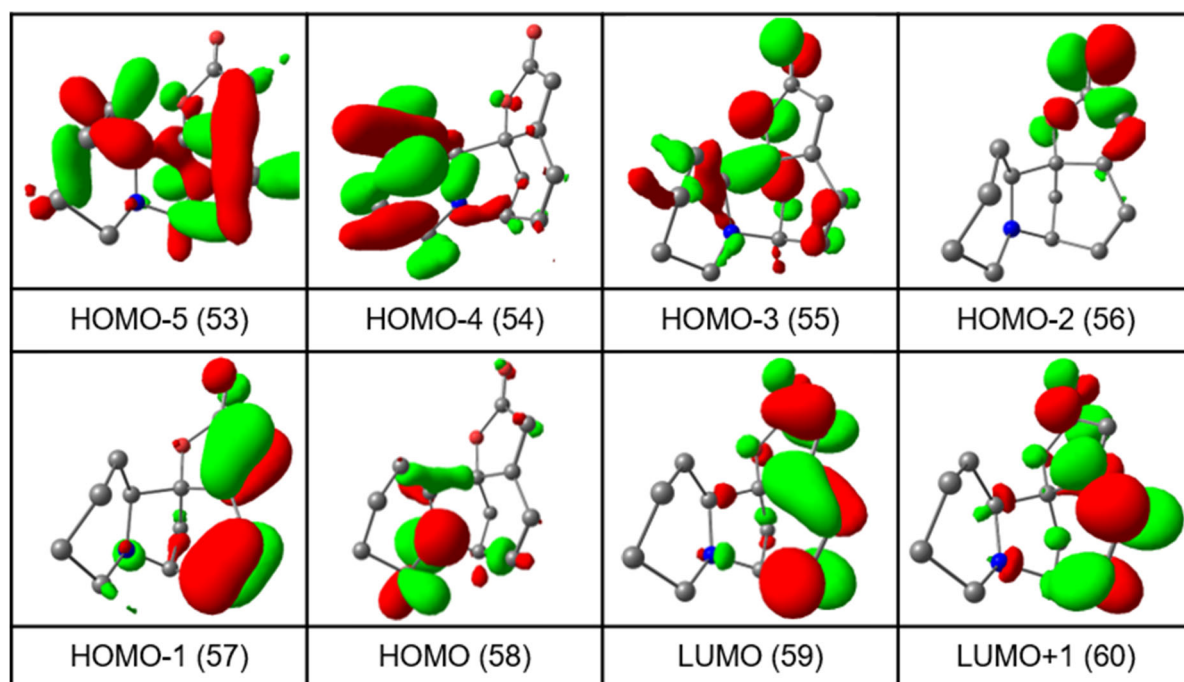

**Figure S27.** Molecular orbitals of conformer 1a, allosecurinine (contour value = 0.05).

| Wavelength (nm) | Oscillator Strength | Rotatory Strength | Contributions                                                                   | Assignments & notes                              |
|-----------------|---------------------|-------------------|---------------------------------------------------------------------------------|--------------------------------------------------|
| <b>435.61</b>   | <b>0.0319</b>       | <b>-45.6687</b>   | <b>98.7% H → L</b>                                                              | <b>Nitrogen lone pair → π*, minor absorption</b> |
| 268.64          | 0.0042              | 17.3839           | 95.5% H-2 → L, 2.31% H-2 → L+1                                                  |                                                  |
| <b>263.64</b>   | <b>0.425</b>        | <b>-48.1454</b>   | <b>95.4% H-1 → L</b>                                                            | <b>π → π*, major absorption</b>                  |
| 240.21          | 0.0207              | 23.4212           | 96.2% H → L+1                                                                   |                                                  |
| 235.21          | 0.0248              | 3.0714            | 96.7% H-3 → L                                                                   |                                                  |
| 214.99          | 0.0046              | 2.6094            | 71.0% H → L+2, 22.8% H-5 → L                                                    |                                                  |
| 214.31          | 0.0093              | 6.2619            | 61.0% H-5 → L, 26.1% H → L+2,<br>3.18% H-9 → L, 2.84% H-4 → L,<br>2.72% H-6 → L |                                                  |
| 207.20          | 0.0017              | 2.1457            | 93.9% H-4 → L, 4.43% H-5 → L                                                    |                                                  |

**Table S7.** Excitation energies (wavelength in nm), oscillator strength, rotatory strength (velocity) and orbital contributions of each excited state of conformer 1a, allosecurinine. Excitation energies over 200 nm were only included. H: HOMO, L: LUMO.

## 7.2 Conformer 1b, allosecurinine

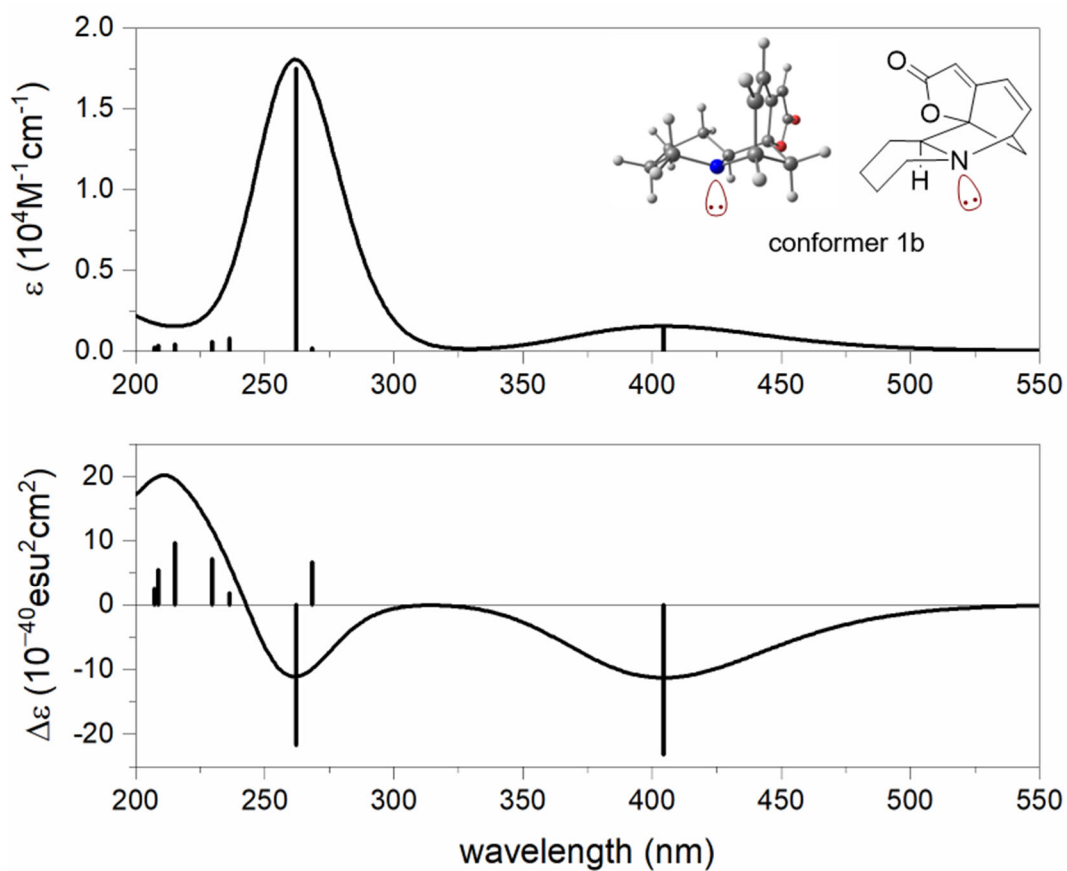

**Figure S28.** Calculated absorption and ECD spectra of conformer 1b, allosecurinine.

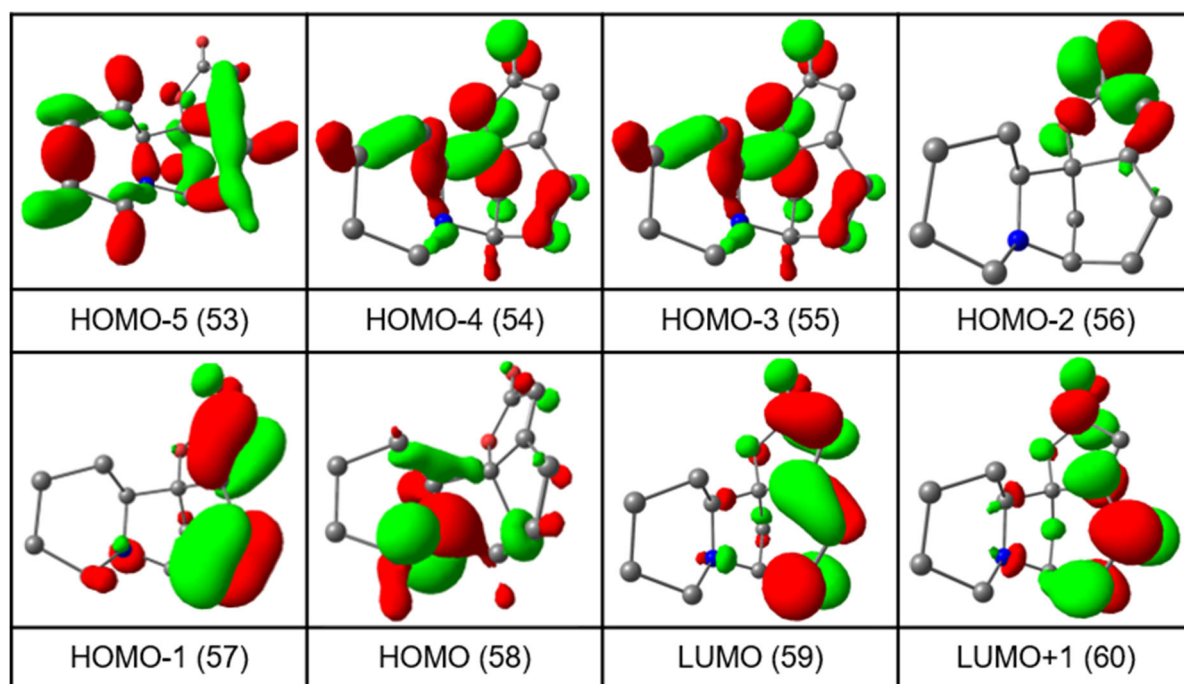

**Figure S29.** Molecular orbitals of conformer 1b, allosecurinine (contour value = 0.05).

| Wavelength (nm) | Oscillator Strength | Rotatory Strength | Contributions                                              | Assignments & notes                              |
|-----------------|---------------------|-------------------|------------------------------------------------------------|--------------------------------------------------|
| <b>404.39</b>   | <b>0.0377</b>       | <b>-60.0514</b>   | <b>98.3% H → L</b>                                         | <b>Nitrogen lone pair → π*, minor absorption</b> |
| 268.41          | 0.0044              | 17.477            | 95.5% H-2 → L, 2.34% H-2 → L+1                             |                                                  |
| <b>262.09</b>   | <b>0.4371</b>       | <b>-56.2999</b>   | <b>95.2% H-1 → L</b>                                       | <b>π → π*, major absorption</b>                  |
| 236.23          | 0.0192              | 4.6248            | 97.0% H-3 → L                                              |                                                  |
| 229.53          | 0.0147              | 18.7075           | 94.6% H → L+1                                              |                                                  |
| 215.17          | 0.0108              | 25.3121           | 50.1% H-4 → L, 36.0% H-5 → L, 5.73% H-8 → L, 2.66% H → L+1 |                                                  |
| 208.76          | 0.0087              | 14.3649           | 97.5% H → L+2                                              |                                                  |
| 207.14          | 0.0055              | 6.315             | 49.8% H-5 → L, 44.9% H-4 → L, 2.47% H-6 → L                |                                                  |

**Table S8.** Excitation energies (wavelength in nm), oscillator strength, rotatory strength (velocity) and orbital contributions of each excited state of conformer 1b, allosecurinine. Excitation energies over 200 nm were only included. H: HOMO, L: LUMO.



### 7.3 Conformer 1c, allosecurinine

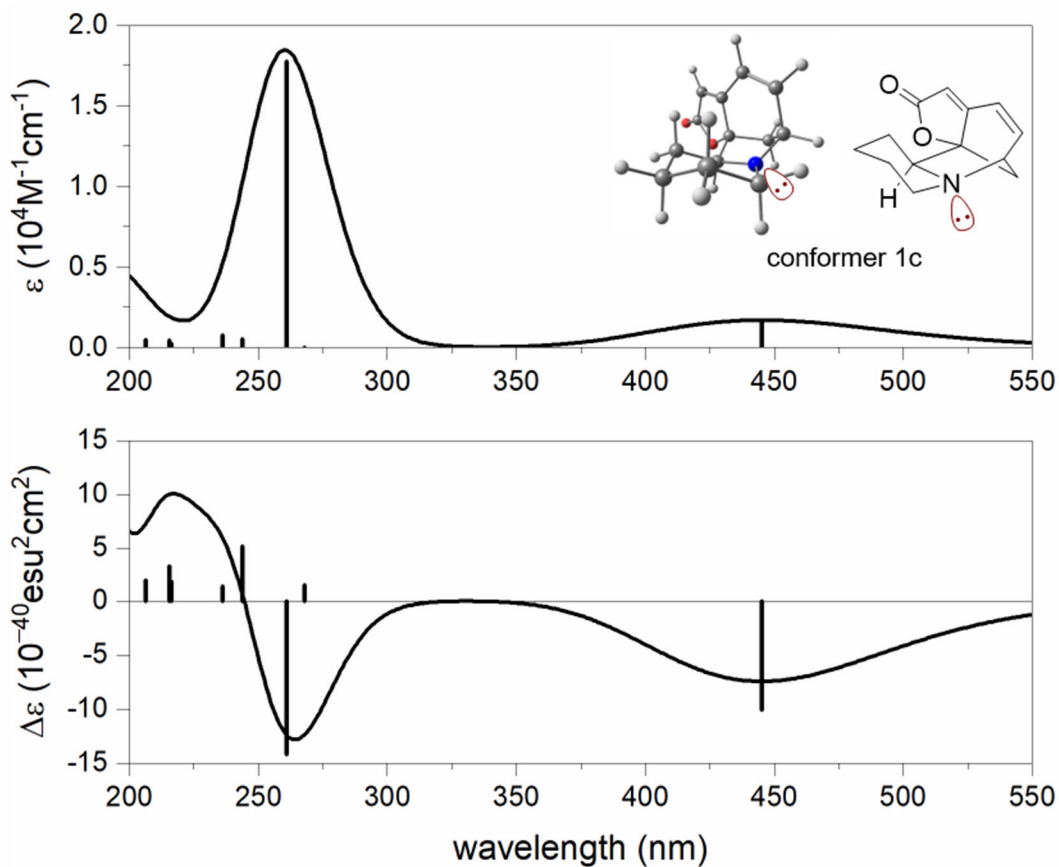

**Figure S30.** Calculated absorption and ECD spectra of conformer 1c, allosecurinine.

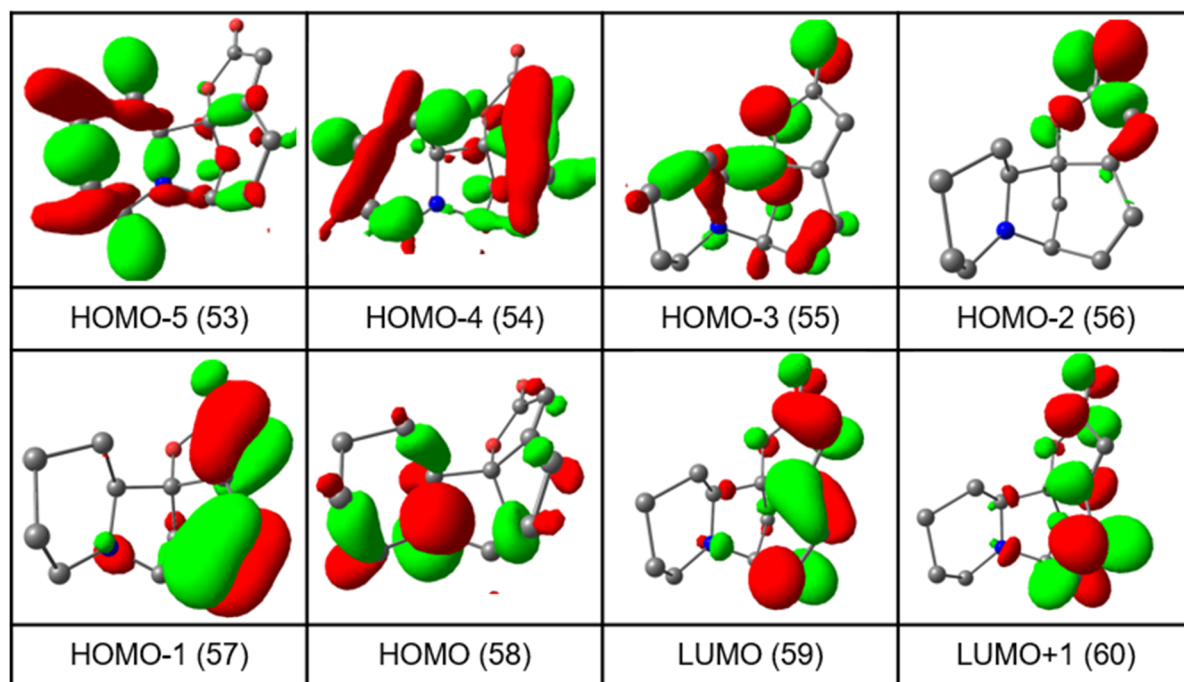

**Figure S31.** Molecular orbitals of conformer 1c, allosecurinine (contour value = 0.05).

| Wavelength (nm) | Oscillator Strength | Rotatory Strength | Contributions                                              | Assignments & notes                              |
|-----------------|---------------------|-------------------|------------------------------------------------------------|--------------------------------------------------|
| <b>445.12</b>   | <b>0.0417</b>       | <b>-43.5627</b>   | <b>98.9% H → L</b>                                         | <b>Nitrogen lone pair → π*, minor absorption</b> |
| 267.77          | 0.0007              | 6.4939            | 96.5% H-2 → L, 2.46% H-2 → L+1                             |                                                  |
| <b>260.79</b>   | <b>0.4441</b>       | <b>-61.4092</b>   | <b>96.4% H-1 → L</b>                                       | <b>π → π*, major absorption</b>                  |
| 243.65          | 0.0135              | 22.4874           | 95.8% H → L+1                                              |                                                  |
| 235.96          | 0.0187              | 5.8151            | 96.0% H-3 → L                                              |                                                  |
| 216.29          | 0.0059              | 8.0098            | 44.7% H → L+2, 32.2% H-4 → L, 14.2% H-5 → L, 3.19% H-6 → L |                                                  |
| 215.4           | 0.0111              | 14.3147           | 51.5% H → L+2, 27.1% H-4 → L, 12.3% H-5 → L, 2.82% H-6 → L |                                                  |
| 206.16          | 0.0123              | 8.7169            | 67.5% H-5 → L, 30.2% H-4 → L                               |                                                  |

**Table S9.** Excitation energies (wavelength in nm), oscillator strength, rotatory strength (velocity) and orbital contributions of each excited state of conformer 1c, allosecurinine. Excitation energies over 200 nm were only included. H: HOMO, L: LUMO.

### 7.4 Conformer 1d, allosecurinine

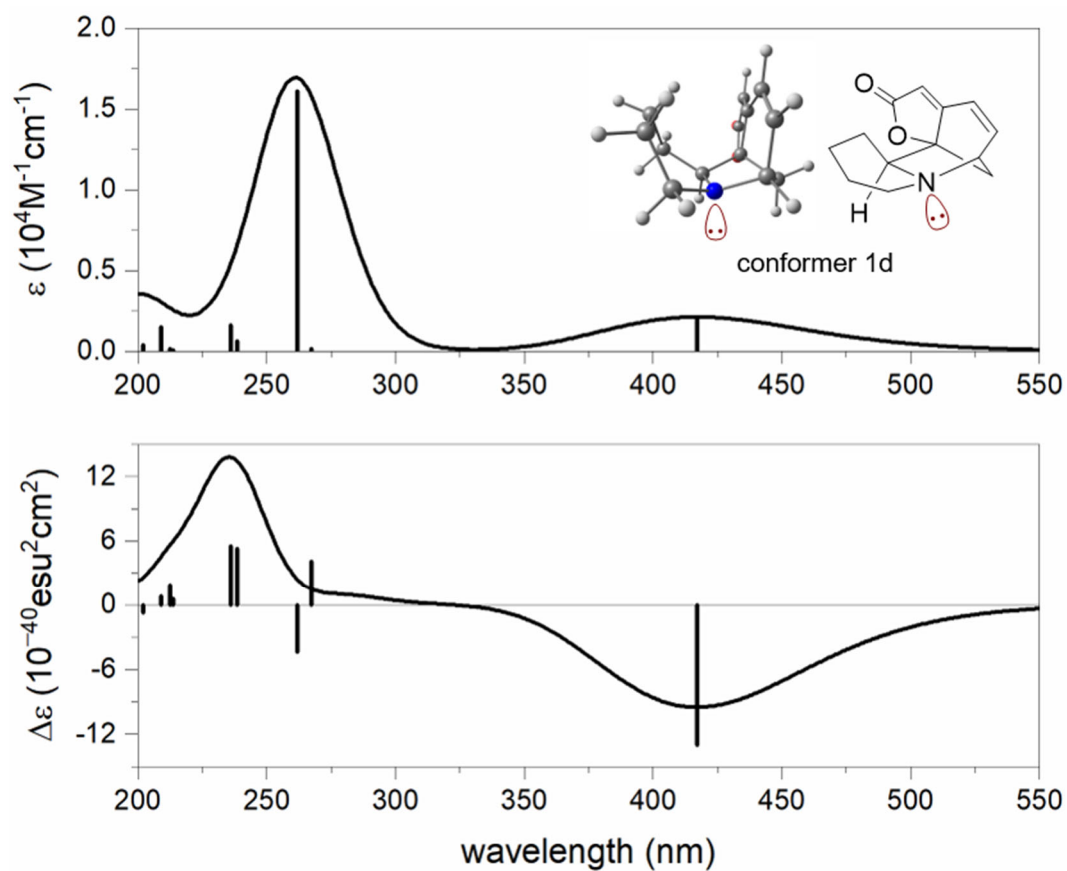

**Figure S32.** Calculated absorption and ECD spectra of conformer 1d, allosecurinine.

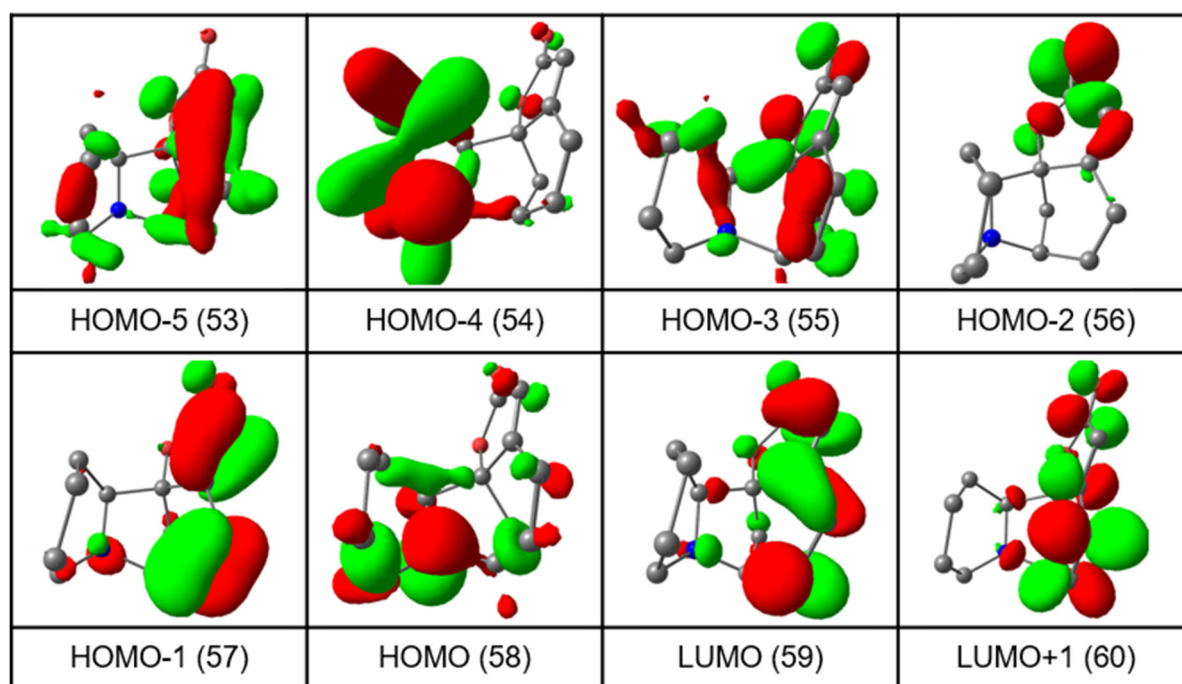

**Figure S33.** Molecular orbitals of conformer 1d, allosecurinine (contour value = 0.05)

| Wavelength (nm) | Oscillator Strength | Rotatory Strength | Contributions                                                             | Assignments & notes                              |
|-----------------|---------------------|-------------------|---------------------------------------------------------------------------|--------------------------------------------------|
| <b>416.99</b>   | <b>0.0520</b>       | <b>-52.0201</b>   | <b>98.4% H → L</b>                                                        | <b>Nitrogen lone pair → π*, minor absorption</b> |
| 267.31          | 0.0036              | 16.4208           | 95.6% H-2 → L, 2.36% H-2 → L+1                                            |                                                  |
| <b>261.94</b>   | <b>0.4029</b>       | <b>-17.4734</b>   | <b>94.7% H-1 → L</b>                                                      | <b>π → π*, major absorption</b>                  |
| 238.52          | 0.0154              | 21.2031           | 83.2% H → L+1, 14.2% H-3 → L                                              |                                                  |
| 236.00          | 0.0409              | 22.1381           | 83.1% H-3 → L, 13.7% H → L+1                                              |                                                  |
| 213.74          | 0.0017              | 2.2752            | 78.6% H → L+2, 7.10% H-5 → L, 6.70% H-6 → L, 3.81% H-4 → L                |                                                  |
| 212.60          | 0.0037              | 7.6093            | 27.2% H-6 → L, 26.7% H-5 → L, 20.2% H-4 → L, 18.4% H → L+2, 2.75% H-7 → L |                                                  |
| 208.90          | 0.0370              | 3.3846            | 74.0% H-4 → L, 10.4% H-5 → L, 9.77% H-6 → L, 3.70% H-7 → L                |                                                  |
| 202.11          | 0.0100              | -2.8976           | 50.9% H-6 → L, 45.0% H-5 → L, 2.65% H-1 → L+1                             |                                                  |

**Table S10.** Excitation energies (wavelength in nm), oscillator strength, rotatory strength (velocity) and orbital contributions of each excited state of conformer 1d, allosecurinine. Excitation energies over 200 nm were only included. H: HOMO, L: LUMO

### 7.5 Conformer 2a, allosecurinine

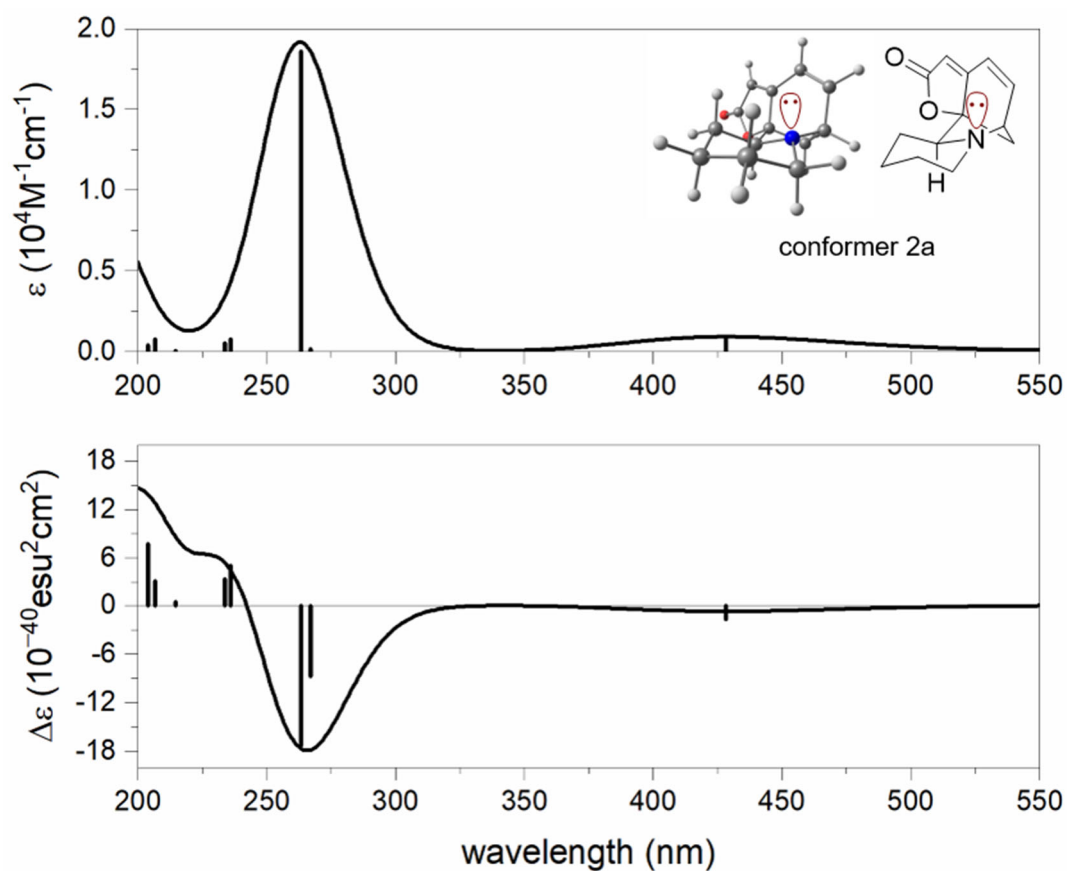

**Figure S34.** Calculated absorption and ECD spectra of conformer 2a, allosecurinine.

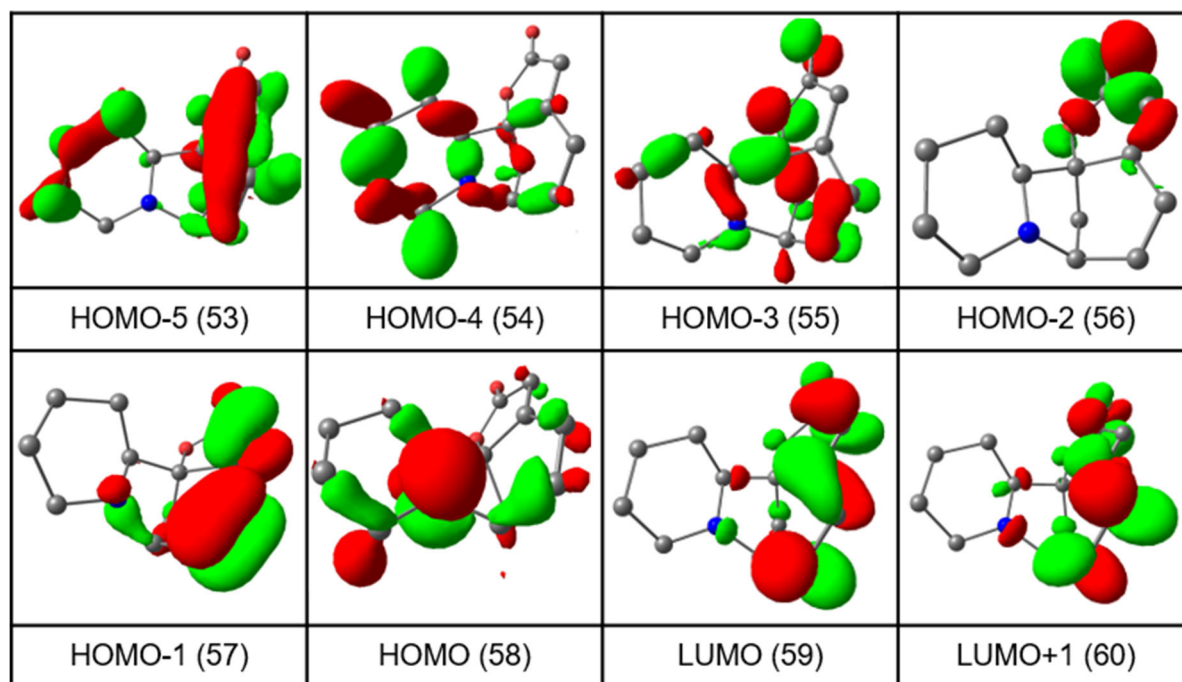

**Figure S35.** Molecular orbitals of conformer 2a, allosecurinine (contour value = 0.05).

| Wavelength (nm) | Oscillator Strength | Rotatory Strength | Contributions                                              | Assignments & notes                                  |
|-----------------|---------------------|-------------------|------------------------------------------------------------|------------------------------------------------------|
| <b>428.25</b>   | <b>0.0224</b>       | <b>-4.2073</b>    | <b>98.6% H → L</b>                                         | <b>Nitrogen lone pair → π*, diminished intensity</b> |
| 266.94          | 0.0038              | -21.8909          | 95.8% H-2 → L, 2.38% H-2 → L+1                             |                                                      |
| <b>263.19</b>   | <b>0.4649</b>       | <b>-43.2254</b>   | <b>95.7% H-1 → L</b>                                       | <b>π → π*, major absorption</b>                      |
| 235.93          | 0.0189              | 12.6932           | 67.9% H → L+1, 29.6% H-3 → L                               |                                                      |
| 233.59          | 0.0133              | 8.4537            | 68.3% H-3 → L, 29.3% H → L+1                               |                                                      |
| 214.47          | 0.0009              | 1.1283            | 53.8% H-4 → L, 35.4% H-5 → L, 4.07% H-8 → L, 2.49% H-9 → L |                                                      |
| 206.65          | 0.0195              | 7.9207            | 95.5% H → L+2, 2.66% H → L+3                               |                                                      |
| 203.94          | 0.0105              | 19.3951           | 51.2% H-5 → L, 42.6% H-4 → L, 2.02% H-1 → L+1              |                                                      |

**Table S11.** Excitation energies (wavelength in nm), oscillator strength, rotatory strength (velocity) and orbital contributions of each excited state of conformer 2a, allosecurinine. Excitation energies over 200 nm were only included. H: HOMO, L: LUMO

### 7.6 Conformer 2b, allosecurinine

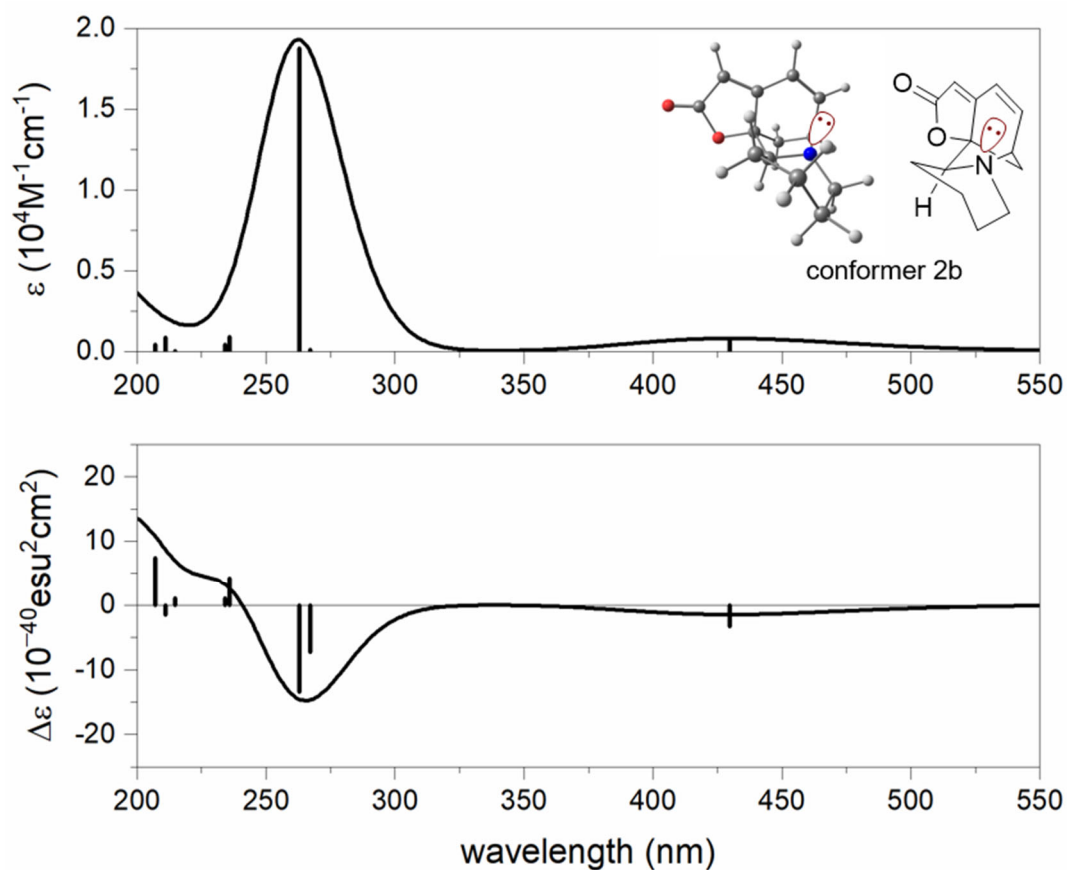

**Figure S36.** Calculated absorption and ECD spectra of conformer 2b, allosecurinine.

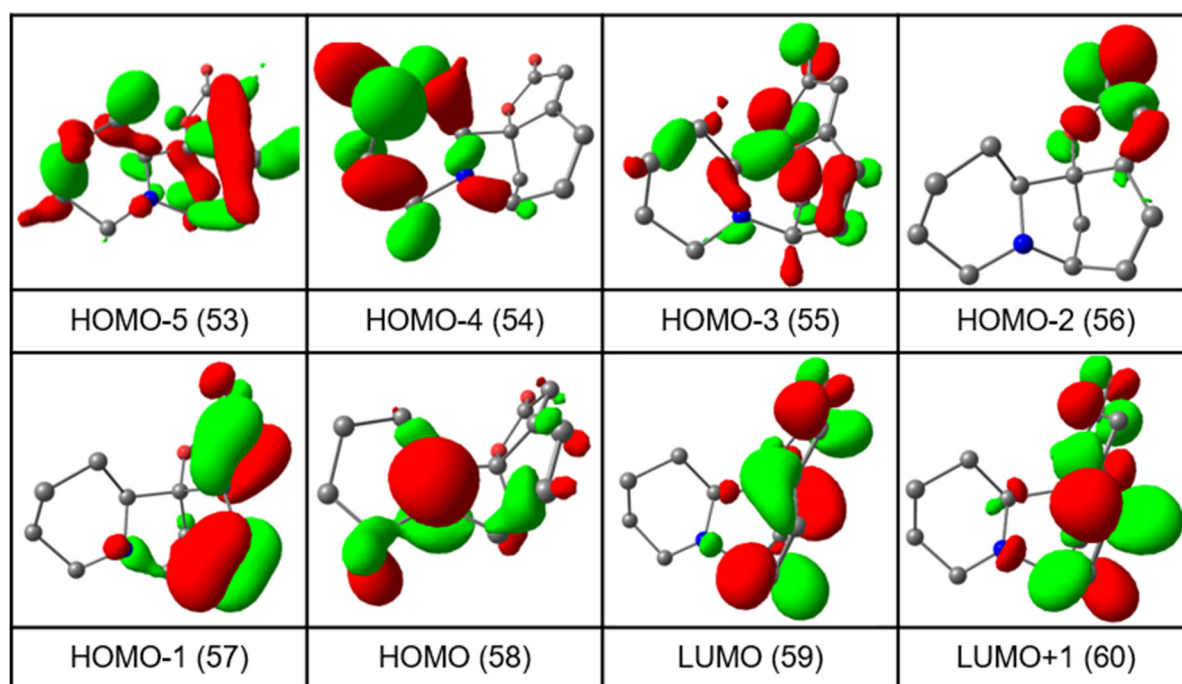

**Figure S37.** Molecular orbitals of conformer 2b, allosecurinine (contour value = 0.05).

| Wavelength (nm) | Oscillator Strength | Rotatory Strength | Contributions                                              | Assignments & notes                                  |
|-----------------|---------------------|-------------------|------------------------------------------------------------|------------------------------------------------------|
| <b>429.79</b>   | <b>0.0195</b>       | <b>-8.5088</b>    | <b>98.8% H → L</b>                                         | <b>Nitrogen lone pair → π*, diminished intensity</b> |
| 267.11          | 0.0028              | -18.7652          | 96.0% H-2 → L, 2.33% H-2 → L+1                             |                                                      |
| <b>262.84</b>   | <b>0.4689</b>       | <b>-34.7718</b>   | <b>96.0% H-1 → L</b>                                       | <b>π → π*, major absorption</b>                      |
| 235.88          | 0.0222              | 11.0064           | 61.2% H → L+1, 36.1% H-3 → L                               |                                                      |
| 234.04          | 0.0107              | 2.7471            | 61.8% H-3 → L, 35.9% H → L+1                               |                                                      |
| 214.7           | 0.0011              | 2.7362            | 81.2% H-5 → L, 5.73% H-4 → L, 5.22% H-8 → L, 2.50% H-6 → L |                                                      |
| 210.9           | 0.0216              | -4.0168           | 96.9% H → L+2                                              |                                                      |
| 207.1           | 0.0102              | 19.2212           | 92.3% H-4 → L, 5.52% H-5 → L                               |                                                      |

**Table S12.** Excitation energies (wavelength in nm), oscillator strength, rotatory strength (velocity) and orbital contributions of each excited state of conformer 2b, allosecurinine. Excitation energies over 200 nm were only included. H: HOMO, L: LUMO.



### 7.7 Results of TDDFT calculation: relation between conformation and ECD spectra

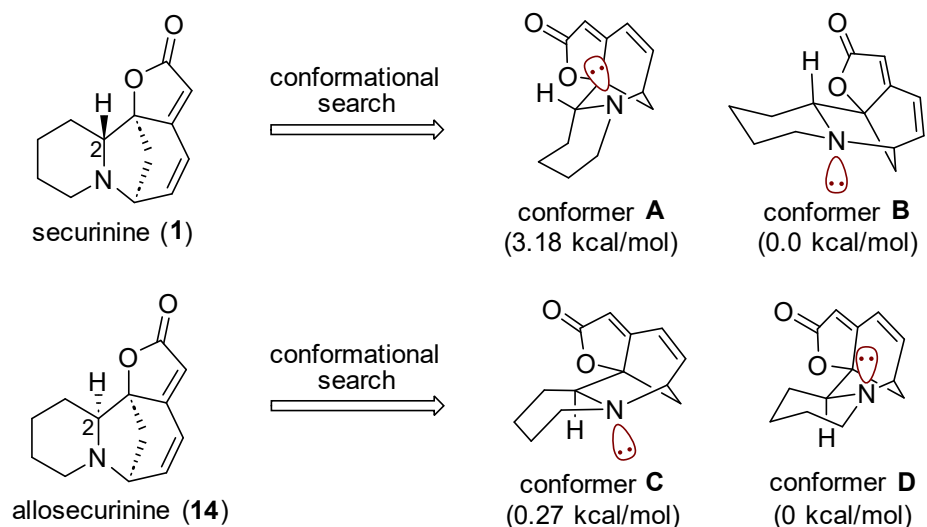

**Figure S38.** Conformational search of securinine (1) and allosecurinine (14).

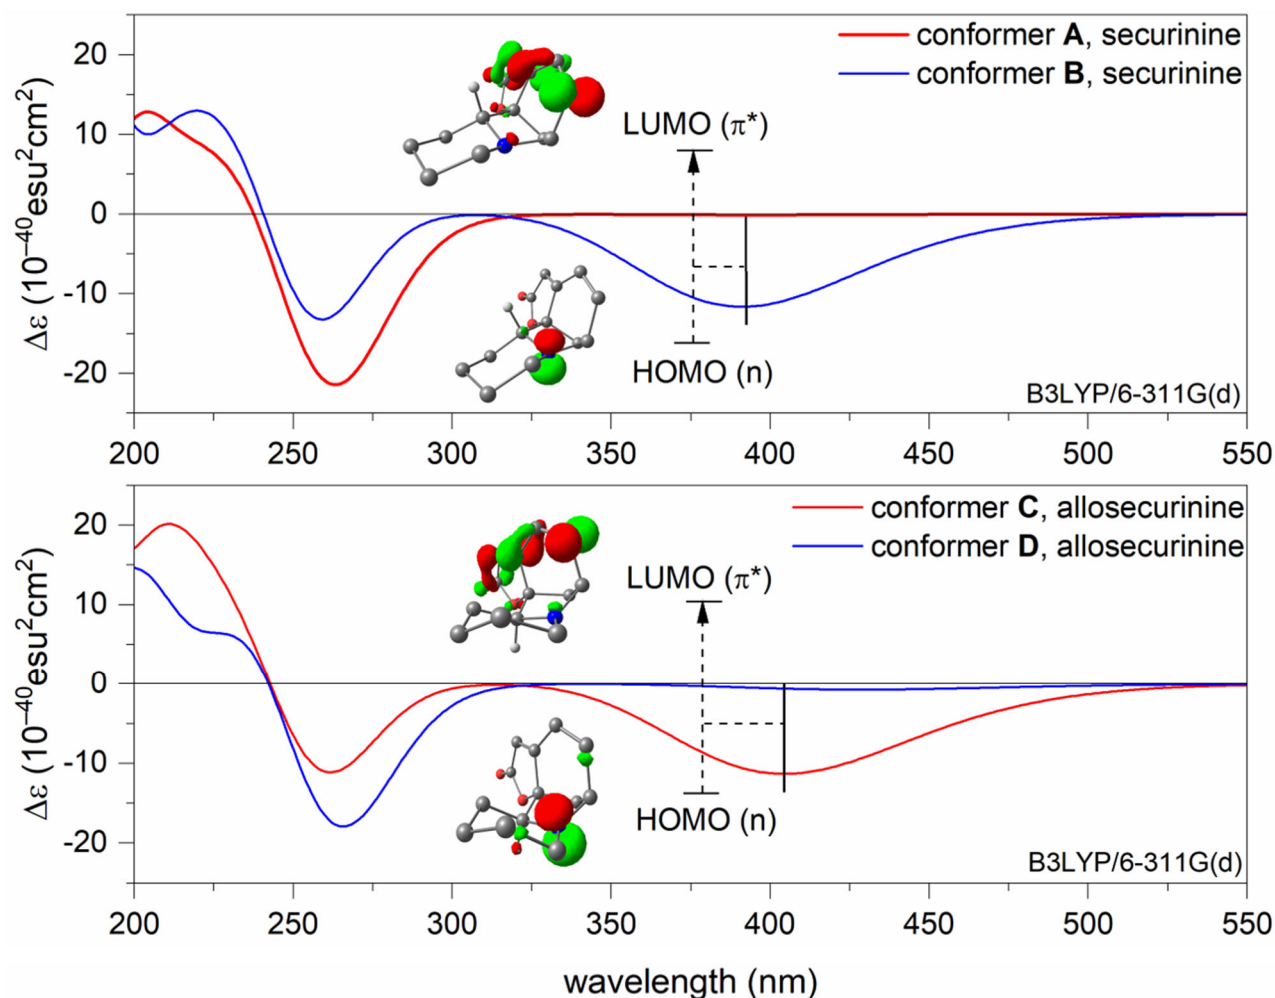

**Figure S39.** Calculated ECD spectra of securinine (1) and allosecurinine (14).

During calculations, five different conformers of **1** and six different conformers of **14** were obtained (Figure S12 and S24). Notably, only a subset of these conformers reproduced the observed ECD spectra (Figure S13 and S25). The conformers were categorized into two groups based on the orientation of the nitrogen lone pair in relation to the conjugated  $\pi$  system. The representative lowest-energy conformers from each group are displayed in Figure S38. As depicted in Figure S39, their TDDFT-simulated ECD spectra displayed distinct patterns. Only conformer **B** of **1** and conformer **C** of **14** reproduced the spectroscopically observed two strong negative ECD features at 340 nm and 250 nm, respectively, although TDDFT-calculated transition energies were underestimated to 405 nm and 270 nm (Figure S39).

TDDFT computations showed that the lowest-energy ECD features of securinine (**1**), allosecurinine (**14**) and suffruticosine are all associated with the same electronic transition, from N lone pair to the  $\pi^*$  CT transition. Regardless of conformations, the experimentally observed negative feature at 250 nm and the positive feature at 210 nm, could be reproduced. Bands 2 and 3 are associated with  $\pi$  to  $\pi^*$  and N lone pair to higher  $\pi^*$ , respectively, which are not affected by the configuration of C2. These assignments and similarity of structures prove the chirality of only C7 and C9. Our findings also suggest that the band 3 in suffruticosine is attributed to the positioning of its N1 lone pair in the opposite orientation of the conjugated  $\pi$ -system (O2, O3–C15).

## 8. Experimental Procedures and Physical Data for Newly Synthesized Compounds

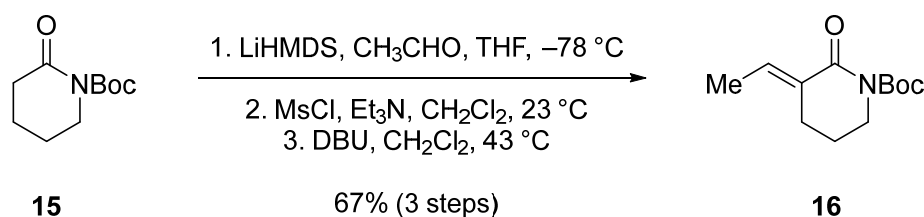

### 8.1 Unsaturated $\delta$ -lactam **16**

**15** was prepared in one step.<sup>14</sup> Solution of **15** (7.15 g, 29.6 mmol, 1.0 eq) in 30 mL THF was slowly added into prepared LiHMDS solution (1.0 M in THF, 32.6 mL, 32.6 mmol, 1.1 eq) via cannula at  $-78$  °C, and the mixture was stirred at  $-78$  °C for 0.5 h. Acetaldehyde solution (3 M in THF, 19.7 mL, 59.3 mmol, 2.0 eq) was added dropwise via syringe, and the reaction mixture was stirred for additional 1 h at  $-78$  °C. The reaction mixture was quenched by slowly adding saturated aqueous ammonium chloride solution (100 mL). The aqueous layer was extracted with ethyl acetate ( $3 \times 100$  mL), and the combined organic layers were dried over anhydrous magnesium sulfate. The resulting filtrate was concentrated under reduced pressure.

The resulting crude was dissolved in dichloromethane (150 mL) and cooled to 0 °C. Methanesulfonyl chloride (4.6 mL, 59.3 mmol, 2.0 eq) was added, followed by triethylamine (12.5 mL, 88.8 mmol, 3.0 eq) at 0 °C. The reaction mixture was warmed to 23 °C and stirred for 20 h. The reaction mixture was quenched by adding water (100 mL). The aqueous layer was extracted with dichloromethane ( $3 \times 100$  mL), and the combined organic layers were dried over anhydrous magnesium sulfate. The resulting filtrate was concentrated under reduced pressure.

The resulting crude was dissolved in dichloromethane (150 mL). 1,8-Diazabicyclo[5.4.0]undec-7-ene (5.3 mL, 35.6 mmol, 1.2 eq) was added dropwise and the solution was refluxed for 16 h. The reaction mixture was quenched by adding saturated aqueous ammonium chloride solution (100 mL). The aqueous layer was extracted with dichloromethane ( $3 \times 100$  mL), and the combined organic layers were dried over anhydrous magnesium sulfate. The resulting filtrate was concentrated under reduced pressure. The resulting crude residue was purified by flash column chromatography (silica gel: diam. 6 cm, ht. 14 cm; eluent: ethyl acetate/hexane = 1/4) to afford **16** (4.5 g, 67%) as a yellow oil.

**<sup>1</sup>H NMR** (500 MHz, CDCl<sub>3</sub>)  $\delta$  7.01 (qt,  $J = 7.2, 2.2$  Hz, 1H), 3.68 – 3.63 (m, 2H), 2.46 – 2.39 (m, 2H), 1.87 – 1.79 (m, 2H), 1.73 (dt,  $J = 7.3, 1.4$  Hz, 3H), 1.50 (s, 9H).

**<sup>13</sup>C NMR** (126 MHz, CDCl<sub>3</sub>):  $\delta$  165.62, 153.38, 137.62, 131.06, 82.90, 46.01, 28.25, 24.31, 22.40, 14.26.

**HRMS** (ESI): Calculated for C<sub>12</sub>H<sub>19</sub>NO<sub>3</sub> [M+Na]<sup>+</sup>: 248.1258, found: 248.1259.

**TLC** (ethyl acetate/hexane = 1/4) R<sub>f</sub>: 0.23 (UV, KMnO<sub>4</sub>).

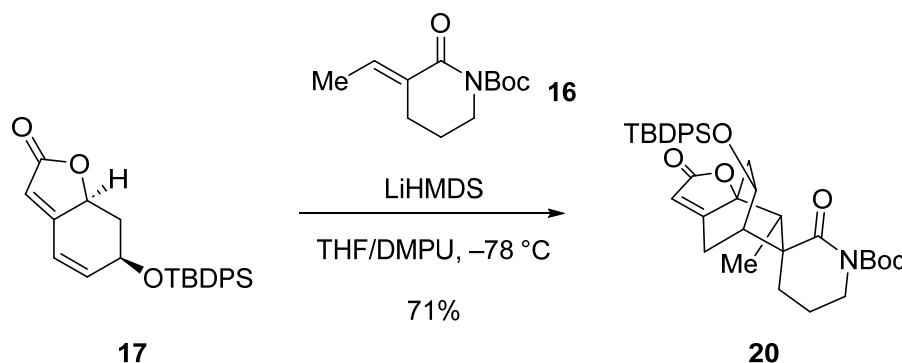

## 8.2 Boc-protected spiro- $\delta$ -lactam **20**

**17** (118 mg, 0.302 mmol, 1.0 eq) in THF (1.0 mL) was slowly added to solution of LiHMDS (0.5 M in THF, 0.66 mL, 0.332 mmol, 1.1 eq) via syringe at  $-78$  °C. The yellow solution was stirred for 15 min. Solution of **16** (75 mg, 0.332 mmol, 1.1 eq) in THF/DMPU (1.1 mL/0.66 mL) was then added dropwise into the reaction mixture. The mixture instantly turned into red, and was stirred for additional 4 h at  $-78$  °C. The reaction mixture was quenched by adding with precooled aqueous ammonium chloride solution (1.0 mL) at 0 °C, and the mixture was vigorously stirred until reaching room temperature. The aqueous layer was extracted with ethyl acetate ( $3 \times 10$  mL), and the combined organic layers were washed with water ( $3 \times 10$  mL). The combined layers were dried over anhydrous sodium sulfate. The resulting filtrate was concentrated under reduced pressure. The resulting crude residue was purified by flash column chromatography (silica gel: diam. 2 cm, ht. 12 cm; eluent: ethyl acetate/hexane = 1/10 to 1/5 to 1/2) to afford **20** (132 mg, 71%) as a white foam.

**$^1\text{H}$  NMR** (500 MHz,  $\text{CDCl}_3$ )  $\delta$  7.64 (d,  $J = 7.3$  Hz, 2H), 7.48 (d,  $J = 7.3$  Hz, 2H), 7.39 (dd,  $J = 9.6, 7.3$  Hz, 2H), 7.33 (t,  $J = 8.1$  Hz, 4H), 5.75 (s, 1H), 4.21 (d,  $J = 9.0$  Hz, 1H), 3.28 (q,  $J = 7.3, 5.2$  Hz, 3H), 3.15 (d,  $J = 19.7$  Hz, 1H), 2.76 (dd,  $J = 13.1, 9.1$  Hz, 1H), 2.41 (d,  $J = 19.7$  Hz, 1H), 1.75 (d,  $J = 3.6$  Hz, 1H), 1.67 – 1.60 (m, 1H), 1.59 – 1.50 (m, 3H), 1.31 – 1.26 (m, 1H), 1.23 (s, 9H), 1.02 (s, 9H), 0.56 (d,  $J = 7.4$  Hz, 3H).

**$^{13}\text{C}$  NMR** (126 MHz,  $\text{CDCl}_3$ )  $\delta$  175.70, 173.84, 171.53, 154.88, 135.89, 135.70, 134.47, 132.97, 130.16, 130.14, 128.10, 127.99, 112.36, 86.55, 83.04, 65.75, 47.55, 46.82, 41.84, 37.91, 35.65, 27.82, 27.14, 26.95, 20.88, 19.09, 18.32, 9.18.

**HRMS** (ESI): Calculated for  $\text{C}_{36}\text{H}_{45}\text{NO}_6\text{Si}$   $[\text{M}+\text{Na}]^+$ : 638.2909, found: 638.2905.

**TLC** (ethyl acetate/hexane = 1/3)  $R_f$ : 0.29 (UV,  $\text{KMnO}_4$ ).

$[\alpha]_D^{25}$ :  $-0.84$  ( $c = 2.0$ ,  $\text{CHCl}_3$ ).

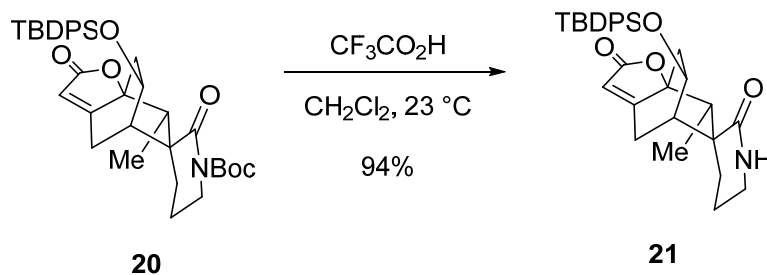

### 83 Spiro- $\delta$ -lactam **21**

Trifluoroacetic acid (0.15 mL, 1.96 mmol, 30 eq) was added to the solution of **20** (40 mg, 0.065 mmol, 1.0 eq) in dichloromethane (1.5 mL) at 23 °C. The reaction mixture was stirred for 16 h. The resulting mixture was evaporated to remove residual acid, and neutralized with saturated aqueous sodium bicarbonate (1.5 mL). The aqueous layer was extracted with dichloromethane (3  $\times$  3.0 mL) and the combined organic layers were dried over anhydrous sodium sulfate. The resulting filtrate was concentrated under reduced pressure. The resulting crude residue was purified by flash column chromatography (silica gel: diam. 2 cm, ht. 7 cm; eluent: ethyl acetate/hexane = 2/1) to afford **21** (31.5 mg, 94%) as white crystalline solid.

**$^1\text{H}$  NMR** (500 MHz,  $\text{CDCl}_3$ ):  $\delta$  7.63 – 7.56 (m, 2H), 7.55 – 7.50 (m, 2H), 7.43 – 7.30 (m, 6H), 5.75 (s, 1H), 5.17 (s, 1H), 4.46 – 4.39 (m, 1H), 3.22 – 3.14 (m, 2H), 3.14 – 3.04 (m, 1H), 2.91 (dd,  $J$  = 12.0, 6.6 Hz, 1H), 2.74 (dd,  $J$  = 12.7, 9.5 Hz, 1H), 2.57 – 2.48 (m, 1H), 1.74 (q,  $J$  = 2.9 Hz, 1H), 1.64 – 1.38 (m, 5H), 1.03 (s, 9H), 0.56 (d,  $J$  = 7.4 Hz, 3H).

**$^{13}\text{C}$  NMR** (126 MHz,  $\text{CDCl}_3$ ):  $\delta$  174.39, 173.84, 172.00, 135.93, 135.80, 134.22, 133.40, 129.98, 129.86, 127.93, 127.89, 112.20, 86.40, 66.01, 44.42, 41.76, 41.44, 38.88, 36.59, 27.20, 25.11, 21.25, 19.21, 17.28, 9.02.

**HRMS** (ESI): Calculated for  $\text{C}_{31}\text{H}_{37}\text{NO}_4\text{Si}$   $[\text{M}+\text{Na}]^+$ : 538.2385, found: 538.2382.

**TLC** (ethyl acetate/hexanes = 2/1)  $R_f$ : 0.30 ( $\text{KMnO}_4$ ).

$[\alpha]_D^{25}$ : 34.9 ( $c$  = 1.0,  $\text{CHCl}_3$ ).

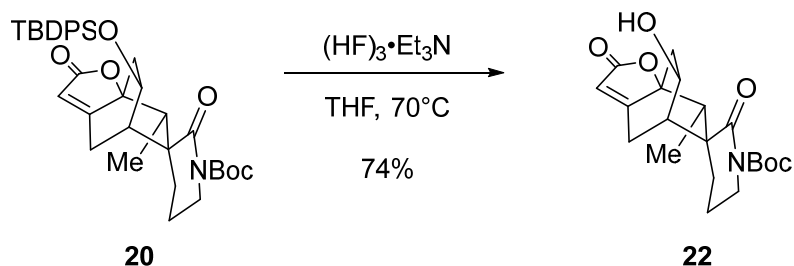

#### 8.4 Alcohol **22**

Triethylamine trihydrofluoride (549 mg, 3.41 mmol, 15.0 eq) was added to **20** (140 mg, 0.227 mmol, 1.0 equiv.) in THF (4.5 mL) at 23 °C. The reaction mixture was stirred at 70 °C for 18 h. The reaction mixture was quenched by slowly adding aqueous sodium bicarbonate solution (8.0 mL). The aqueous layer was extracted with ethyl acetate (3 × 8.0 mL), and the combined organic layers were washed with brine (1 × 8.0 mL). The combined layers were dried over anhydrous sodium sulfate. The resulting filtrate was concentrated under reduced pressure. The resulting crude residue was purified by flash column chromatography (silica gel: diam. 2 cm, ht. 8 cm; eluent: ethyl acetate/hexane = 1/2 to 2/1) afford **22** (64 mg, 75%) as a white foam.

**<sup>1</sup>H NMR** (500 MHz, CDCl<sub>3</sub>) δ 5.74 (t, J = 2.0 Hz, 1H), 4.25 (dtd, J = 9.4, 3.2, 1.3 Hz, 1H), 3.75 – 3.69 (m, 1H), 3.54 – 3.45 (m, 1H), 3.37 (q, J = 7.3 Hz, 1H), 3.16 (dt, J = 19.9, 2.5 Hz, 1H), 2.79 (dd, J = 13.0, 9.5 Hz, 1H), 2.64 (ddt, J = 20.0, 3.2, 1.7 Hz, 1H), 2.37 (q, J = 3.0 Hz, 1H), 1.97 – 1.87 (m, 2H), 1.81 – 1.72 (m, 3H), 1.48 (s, 9H), 1.41 – 1.35 (m, 1H), 0.64 (d, J = 7.3 Hz, 3H).

**<sup>13</sup>C NMR** (126 MHz, CDCl<sub>3</sub>): δ 176.02, 173.65, 171.27, 154.10, 112.51, 86.17, 83.29, 64.30, 48.18, 47.31, 41.09, 39.37, 36.22, 28.16, 26.95, 20.93, 18.94, 9.20.

**HRMS** (ESI): Calculated for C<sub>20</sub>H<sub>27</sub>NO<sub>6</sub> [M+Na]<sup>+</sup>: 400.1731, found: 400.1738.

**TLC** (ethyl acetate/hexane = 2/1) R<sub>f</sub>: 0.17 (KMnO<sub>4</sub>).

**[α]<sub>D</sub><sup>25</sup>**: -27.7 (c = 0.5, CHCl<sub>3</sub>).

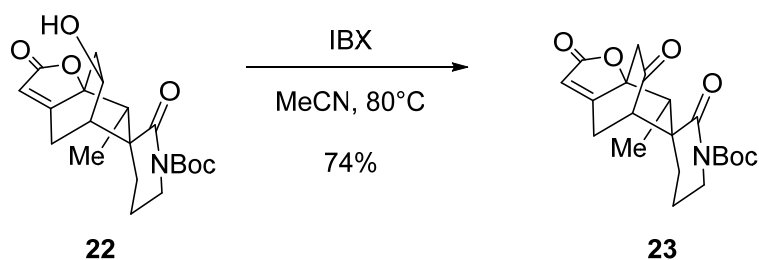

### 8.5 Ketone **23**

2-iodobenzoic acid (222 mg, 0.794 mmol, 2.0 eq) was added to **22** (150 mg, 0.397 mmol, 1.0 eq) in acetonitrile (8.0 mL) at 23 °C. The reaction mixture was stirred at 80 °C for 8 h. The resulting mixture was cooled to 23 °C, and was filtrated through Celite pad. The filtrate was concentrated under reduced pressure and diluted by ethyl acetate (16.0 mL). The organic layer was washed with 10% aqueous sodium thiosulfate (1 × 8.0 mL), followed by washing with saturated aqueous sodium bicarbonate solution (1 × 8.0 mL). The organic layer was dried over anhydrous sodium sulfate. The resulting filtrate was concentrated under reduced pressure. The resulting crude residue was purified by flash column chromatography (silica gel: diam. 2 cm, ht. 10 cm; eluent: ethyl acetate/hexane = 2/1) to afford **23** (111 mg, 74%) as a white foam.

**<sup>1</sup>H NMR** (500 MHz, CDCl<sub>3</sub>) δ 5.89 (t, J = 2.1 Hz, 1H), 3.67 – 3.54 (m, 2H), 3.36 (d, J = 18.0 Hz, 1H), 3.30 (d, J = 7.3 Hz, 1H), 3.00 (dt, J = 20.5, 2.6 Hz, 1H), 2.73 (dt, J = 20.4, 2.5 Hz, 1H), 2.68 (d, J = 3.0 Hz, 1H), 2.29 (d, J = 18.0 Hz, 1H), 1.97 (ddd, J = 13.7, 9.2, 4.0 Hz, 1H), 1.82 (dtt, J = 13.9, 10.1, 4.0 Hz, 2H), 1.66 (ddd, J = 14.1, 7.1, 3.6 Hz, 1H), 1.48 (s, 9H), 0.86 (d, J = 7.3 Hz, 3H).

**<sup>13</sup>C NMR** (126 MHz, CDCl<sub>3</sub>) δ 204.49, 175.25, 172.60, 167.06, 152.93, 114.55, 85.60, 83.89, 51.30, 48.36, 46.85, 46.70, 39.99, 28.08, 26.84, 23.77, 19.96, 9.74.

**HRMS** (ESI): Calculated for C<sub>20</sub>H<sub>25</sub>NO<sub>6</sub> [M+Na]<sup>+</sup>: 398.1575, found: 398.1577

**TLC** (ethyl acetate/hexane = 2/1) R<sub>f</sub>: 0.17 (KMnO<sub>4</sub>).

[α]<sub>D</sub><sup>25</sup>: 7.9 (c = 0.5, CHCl<sub>3</sub>).

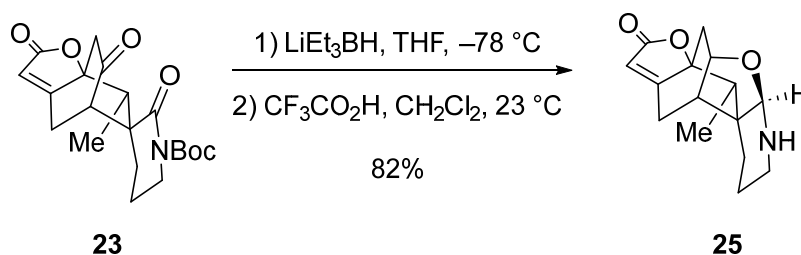

### 8.6 Hemiaminal ether **25**

Lithium triethylborohydride (1 M in THF, 0.12 mmol, 2.2 eq) was added to the stirred solution of **23** (21 mg, 0.056 mmol, 1.0 eq) in THF (1.1 mL) at  $-78\text{ }^{\circ}\text{C}$ . The reaction mixture was stirred for 0.5 h and quenched with saturated ammonium chloride. The aqueous layer was extracted with ethyl acetate ( $3 \times 5\text{ mL}$ ). The combined layers were dried over anhydrous sodium sulfate. The resulting filtrate was concentrated and was used without further purification.

The resulting crude was dissolved in dichloromethane (1.4 mL) and trifluoroacetic acid (0.14 mL) was added at  $23\text{ }^{\circ}\text{C}$ . The reaction mixture was stirred for 20 h and evaporated. The crude mixture was neutralized with saturated sodium bicarbonate solution, and aqueous layer was extracted with ethyl acetate ( $3 \times 5\text{ mL}$ ). The combined layers were dried over anhydrous sodium sulfate and concentrated in vacuo. The resulting crude residue was purified by flash column chromatography (aluminum oxide, basic; diam. 1 cm, ht. 5 cm; eluent: dichloromethane/methanol = 50/1) to afford **25** (12 mg, 82%) as a yellow oil.

**$^1\text{H NMR}$**  (600 MHz,  $\text{CDCl}_3$ ):  $\delta$  5.68 (t,  $J = 2.1\text{ Hz}$ , 1H), 4.49 (t,  $J = 6.1\text{ Hz}$ , 1H), 4.36 (s, 1H), 3.03 – 2.97 (m, 2H), 2.74 (t,  $J = 2.6\text{ Hz}$ , 2H), 2.63 (ddd,  $J = 12.2, 9.7, 5.0\text{ Hz}$ , 1H), 2.19 (q,  $J = 7.4, 6.9\text{ Hz}$ , 2H), 1.71 – 1.63 (m, 3H), 1.52 (ddt,  $J = 12.2, 8.1, 4.1\text{ Hz}$ , 2H), 0.74 (d,  $J = 7.4\text{ Hz}$ , 3H).

**$^{13}\text{C NMR}$**  (126 MHz,  $\text{CDCl}_3$ ):  $\delta$  173.75, 171.42, 111.51, 94.32, 85.41, 75.17, 44.65, 43.07, 42.23, 40.33, 34.19, 24.54, 20.97, 20.43, 9.27.

**HRMS** (ESI): Calculated for  $\text{C}_{15}\text{H}_{19}\text{NO}_3$   $[\text{M}+\text{H}]^+$ : 262.1438, found: 262.1430.

**TLC** (dichloromethane/methanol = 10/1) Rf: 0.25 ( $\text{KMnO}_4$ ).

$[\alpha]_D^{25}$ :  $-55.9$  ( $c = 1.0$ ,  $\text{CHCl}_3$ ).



## 9. Single Crystal X-Ray Diffraction Analysis of Spiro- $\delta$ -lactam 21

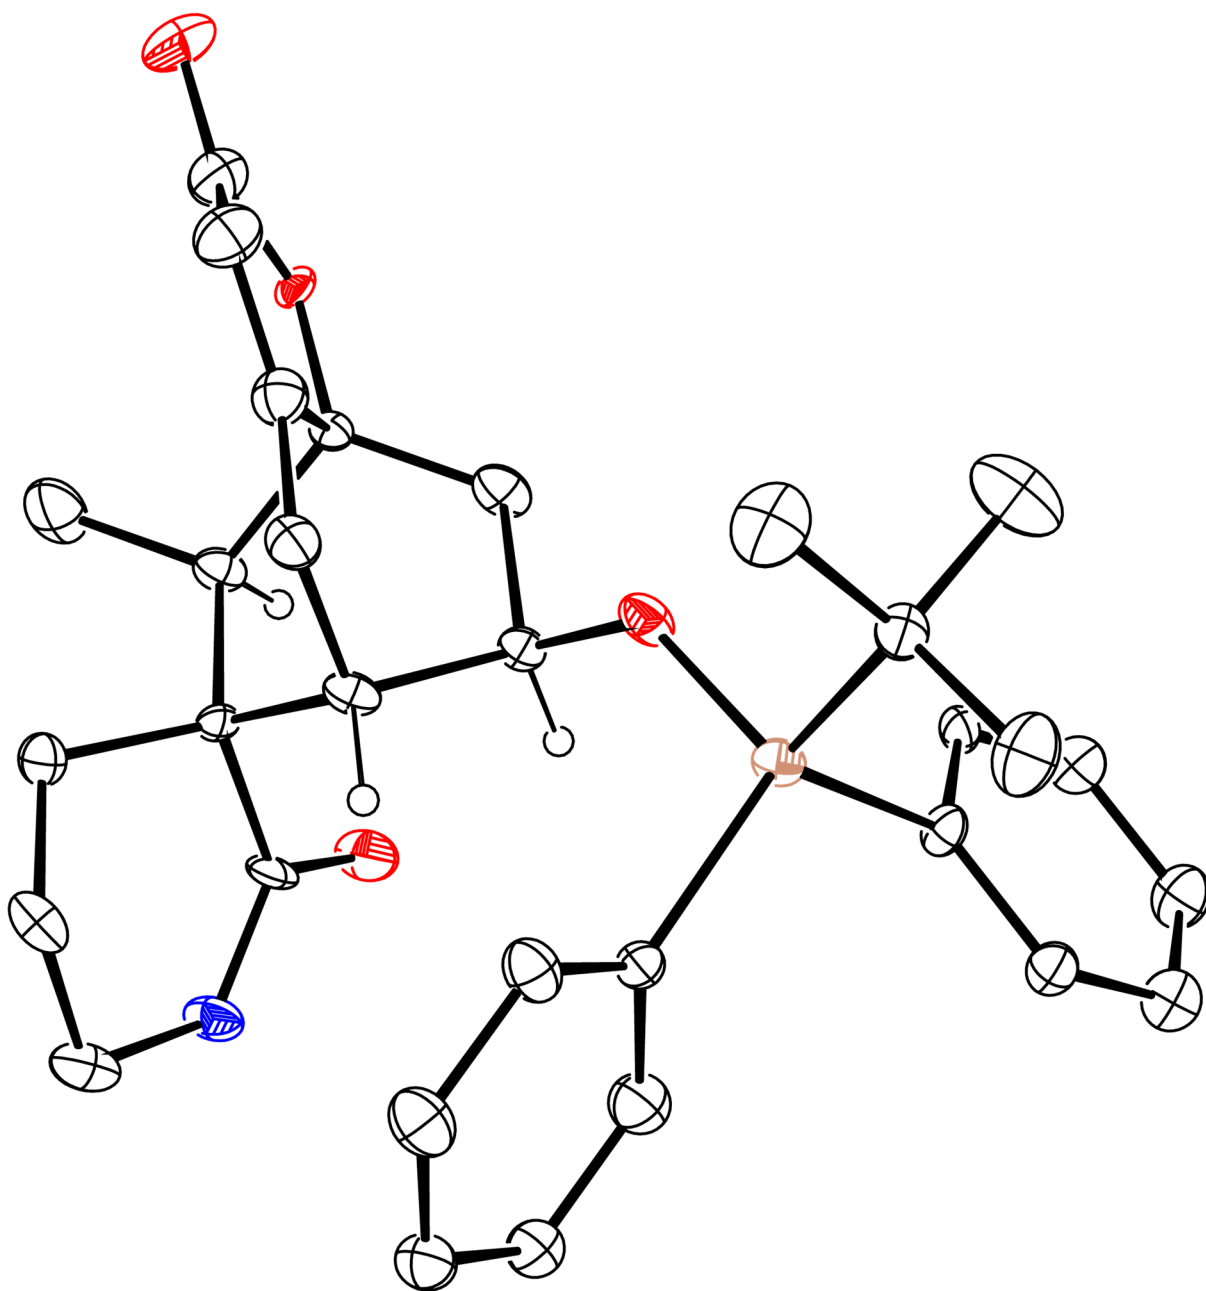

**Figure S40.** Thermal ellipsoid representation of compound 21.

**Table S13.** Crystal data and structure refinement for spiro- $\delta$ -lactam **21**.

|                                   |                                                     |                            |
|-----------------------------------|-----------------------------------------------------|----------------------------|
| Empirical formula                 | C <sub>31</sub> H <sub>37</sub> N O <sub>4</sub> Si |                            |
| Formula weight                    | 515.70                                              |                            |
| Temperature                       | 173(2) K                                            |                            |
| Wavelength                        | 0.71073 Å                                           |                            |
| Crystal system                    | Monoclinic                                          |                            |
| Space group                       | <i>P</i> 2 <sub>1</sub>                             |                            |
| Unit cell dimensions              | a = 16.1777(13) Å                                   | $\alpha = 90^\circ$        |
|                                   | b = 11.4407(11) Å                                   | $\beta = 116.100(2)^\circ$ |
|                                   | c = 17.1218(15) Å                                   | $\gamma = 90^\circ$        |
| Volume                            | 2845.8(4) Å <sup>3</sup>                            |                            |
| Z                                 | 4                                                   |                            |
| Density (calculated)              | 1.204 Mg/m <sup>3</sup>                             |                            |
| Absorption coefficient            | 0.118 mm <sup>-1</sup>                              |                            |
| F(000)                            | 1104                                                |                            |
| Crystal size                      | 0.312 x 0.086 x 0.072 mm <sup>3</sup>               |                            |
| Theta range for data collection   | 2.520 to 27.216°.                                   |                            |
| Index ranges                      | -20 ≤ h ≤ 20, -14 ≤ k ≤ 14, -22 ≤ l ≤ 21            |                            |
| Reflections collected             | 33521                                               |                            |
| Independent reflections           | 12303 [R(int) = 0.1482]                             |                            |
| Completeness to theta = 25.242°   | 99.0 %                                              |                            |
| Absorption correction             | Semi-empirical from equivalents                     |                            |
| Max. and min. transmission        | 0.7455 and 0.1871                                   |                            |
| Refinement method                 | Full-matrix least-squares on F <sup>2</sup>         |                            |
| Data / restraints / parameters    | 12303 / 2143 / 993                                  |                            |
| Goodness-of-fit on F <sup>2</sup> | 1.055                                               |                            |
| Final R indices [I > 2σ(I)]       | R1 = 0.1336, wR2 = 0.3058                           |                            |
| R indices (all data)              | R1 = 0.1834, wR2 = 0.3350                           |                            |
| Absolute structure parameter      | 0.45(15)                                            |                            |
| Largest diff. peak and hole       | 0.655 and -0.787 e·Å <sup>-3</sup>                  |                            |

**Table S14.** Atomic coordinates (  $\times 10^4$  ) and equivalent isotropic displacement parameters (  $\text{\AA}^2 \times 10^3$  ) for spiro- $\delta$ -lactam **21**. U(eq) is defined as one third of the trace of the orthogonalized  $U^{\text{ij}}$  tensor.

|        | x        | y        | z         | U(eq) |
|--------|----------|----------|-----------|-------|
| O(1)   | 8416(5)  | 5439(8)  | 3930(5)   | 41(2) |
| C(2)   | 7684(7)  | 5886(10) | 3839(6)   | 26(2) |
| N(3)   | 7056(6)  | 6218(9)  | 3060(5)   | 33(2) |
| C(4)   | 6198(7)  | 6837(13) | 2829(7)   | 40(3) |
| C(5)   | 5937(7)  | 6893(12) | 3585(7)   | 34(3) |
| C(6)   | 6800(7)  | 7086(10) | 4424(7)   | 32(3) |
| C(7)   | 7471(6)  | 6054(9)  | 4625(5)   | 22(2) |
| C(8)   | 8407(7)  | 6265(10) | 5466(6)   | 27(2) |
| C(9)   | 8586(10) | 7516(12) | 5801(9)   | 52(4) |
| C(16)  | 6731(8)  | 5057(11) | 5489(7)   | 31(3) |
| C(17)  | 7027(6)  | 4886(10) | 4752(6)   | 25(2) |
| C(18)  | 7695(6)  | 3866(10) | 4996(6)   | 23(2) |
| C(19)  | 8543(7)  | 4155(11) | 5857(7)   | 32(3) |
| O(20)  | 7272(5)  | 2838(7)  | 5114(5)   | 31(2) |
| Si(21) | 6667(2)  | 1859(3)  | 4379(2)   | 24(1) |
| C(22)  | 6222(7)  | 864(10)  | 4987(7)   | 28(2) |
| C(23)  | 5546(10) | -10(13)  | 4381(10)  | 49(3) |
| C(24)  | 5747(10) | 1547(14) | 5464(10)  | 52(4) |
| C(25)  | 7025(9)  | 205(16)  | 5672(10)  | 59(4) |
| C(56)  | 9143(7)  | 6409(10) | 38(7)     | 27(2) |
| C(57)  | 8661(6)  | 6099(10) | 615(6)    | 22(2) |
| C(58)  | 7618(6)  | 6148(9)  | 55(6)     | 22(2) |
| C(59)  | 7355(8)  | 7325(11) | -444(8)   | 35(3) |
| O(60)  | 7357(5)  | 5241(7)  | -574(5)   | 33(2) |
| Si(61) | 6900(2)  | 3986(3)  | -506(2)   | 30(1) |
| C(62)  | 6910(9)  | 3115(12) | -1433(8)  | 42(3) |
| C(63)  | 7865(10) | 3132(15) | -1415(11) | 61(4) |
| C(64)  | 6226(10) | 3771(15) | -2291(9)  | 58(4) |
| C(65)  | 6566(10) | 1887(15) | -1481(10) | 58(4) |
| C(10)  | 8430(17) | 5310(20) | 6174(15)  | 19(4) |
| O(11)  | 9129(11) | 5705(15) | 6982(11)  | 24(3) |
| O(12)  | 9234(17) | 6370(20) | 8240(14)  | 66(6) |

|       |           |           |          |       |
|-------|-----------|-----------|----------|-------|
| C(13) | 8778(17)  | 6040(30)  | 7500(16) | 42(5) |
| C(14) | 7763(18)  | 5630(30)  | 7078(17) | 44(5) |
| C(15) | 7570(30)  | 5330(30)  | 6270(30) | 34(5) |
| C(26) | 7484(10)  | 946(16)   | 4047(13) | 24(4) |
| C(27) | 7134(9)   | 199(17)   | 3335(13) | 30(4) |
| C(28) | 7724(12)  | -522(17)  | 3159(10) | 40(5) |
| C(29) | 8665(11)  | -494(18)  | 3697(11) | 41(4) |
| C(30) | 9015(9)   | 254(18)   | 4409(10) | 36(4) |
| C(31) | 8425(11)  | 974(15)   | 4584(10) | 24(4) |
| C(32) | 5782(10)  | 2690(15)  | 3374(10) | 26(4) |
| C(33) | 5980(10)  | 2851(18)  | 2669(12) | 41(4) |
| C(34) | 5382(12)  | 3491(18)  | 1952(10) | 37(4) |
| C(35) | 4587(11)  | 3969(15)  | 1941(9)  | 37(4) |
| C(36) | 4389(10)  | 3808(16)  | 2646(10) | 41(4) |
| C(37) | 4987(10)  | 3168(16)  | 3363(8)  | 34(4) |
| O(41) | 7739(15)  | 6930(30)  | 1860(20) | 37(7) |
| C(42) | 8531(14)  | 6710(30)  | 1988(16) | 29(5) |
| N(43) | 9101(11)  | 6160(20)  | 2690(12) | 31(4) |
| C(44) | 10088(13) | 5960(30)  | 3030(12) | 35(5) |
| C(45) | 10403(14) | 6280(20)  | 2329(13) | 36(5) |
| C(46) | 9927(13)  | 7370(20)  | 1857(13) | 31(5) |
| C(47) | 8882(13)  | 7131(19)  | 1330(14) | 27(4) |
| C(48) | 8341(16)  | 8278(17)  | 876(14)  | 29(4) |
| C(49) | 8820(20)  | 9420(20)  | 1300(20) | 63(8) |
| C(50) | 8130(30)  | 8130(50)  | -110(20) | 28(5) |
| O(51) | 8048(14)  | 9310(20)  | -312(13) | 38(4) |
| O(52) | 8649(15)  | 10510(20) | -978(16) | 53(6) |
| C(53) | 8657(18)  | 9600(30)  | -642(17) | 35(5) |
| C(54) | 9223(19)  | 8570(20)  | -538(17) | 34(5) |
| C(55) | 8910(30)  | 7740(30)  | -180(20) | 34(6) |
| C(66) | 5650(11)  | 4340(18)  | -634(17) | 23(4) |
| C(67) | 5275(14)  | 5455(16)  | -843(15) | 36(5) |
| C(68) | 4389(13)  | 5665(14)  | -940(14) | 36(5) |
| C(69) | 3877(11)  | 4761(17)  | -827(15) | 40(5) |
| C(70) | 4252(13)  | 3646(15)  | -618(16) | 36(5) |
| C(71) | 5139(13)  | 3436(14)  | -521(17) | 34(5) |
| C(72) | 7598(13)  | 3390(20)  | 596(10)  | 29(4) |
| C(73) | 7377(14)  | 3760(20)  | 1255(13) | 37(5) |

|        |           |           |           |        |
|--------|-----------|-----------|-----------|--------|
| C(74)  | 7922(14)  | 3420(20)  | 2110(11)  | 43(5)  |
| C(75)  | 8688(13)  | 2718(19)  | 2306(9)   | 46(5)  |
| C(76)  | 8909(12)  | 2350(17)  | 1647(12)  | 51(5)  |
| C(77)  | 8364(13)  | 2686(19)  | 793(11)   | 42(5)  |
| C(10B) | 8480(40)  | 5510(50)  | 6060(30)  | 25(7)  |
| O(11B) | 9280(30)  | 5420(30)  | 6990(20)  | 29(6)  |
| O(12B) | 9320(20)  | 5840(40)  | 8330(20)  | 39(8)  |
| C(13B) | 8780(30)  | 5600(40)  | 7580(20)  | 30(6)  |
| C(14B) | 7880(30)  | 6040(40)  | 7100(30)  | 36(6)  |
| C(15B) | 7610(50)  | 5560(50)  | 6260(50)  | 33(7)  |
| C(26B) | 7490(20)  | 1160(30)  | 4060(30)  | 28(6)  |
| C(27B) | 7198(17)  | 390(30)   | 3360(30)  | 34(7)  |
| C(28B) | 7840(20)  | -250(30)  | 3210(20)  | 36(6)  |
| C(29B) | 8770(20)  | -120(30)  | 3750(20)  | 41(6)  |
| C(30B) | 9065(17)  | 650(30)   | 4450(20)  | 33(6)  |
| C(31B) | 8420(20)  | 1290(30)  | 4610(20)  | 33(6)  |
| C(32B) | 5680(20)  | 2470(30)  | 3410(20)  | 31(6)  |
| C(33B) | 5851(19)  | 2840(30)  | 2720(20)  | 34(6)  |
| C(34B) | 5220(20)  | 3550(30)  | 2070(20)  | 41(6)  |
| C(35B) | 4414(19)  | 3890(30)  | 2116(19)  | 33(6)  |
| C(36B) | 4241(17)  | 3520(30)  | 2803(19)  | 35(6)  |
| C(37B) | 4870(20)  | 2810(30)  | 3447(16)  | 39(6)  |
| O(41B) | 7778(17)  | 6620(30)  | 1830(30)  | 39(8)  |
| C(42B) | 8606(16)  | 6470(30)  | 2050(20)  | 25(5)  |
| N(43B) | 9123(15)  | 5760(20)  | 2676(15)  | 30(5)  |
| C(44B) | 10064(16) | 5390(30)  | 2953(16)  | 37(5)  |
| C(45B) | 10425(15) | 5670(30)  | 2289(15)  | 28(5)  |
| C(46B) | 10065(15) | 6870(20)  | 1921(16)  | 31(5)  |
| C(47B) | 9008(15)  | 6880(20)  | 1428(16)  | 23(5)  |
| C(48B) | 8620(20)  | 8110(20)  | 1030(20)  | 37(6)  |
| C(49B) | 9290(30)  | 9130(30)  | 1360(30)  | 78(11) |
| C(50B) | 8210(40)  | 8120(60)  | 20(30)    | 25(5)  |
| O(51B) | 7886(18)  | 9200(20)  | -590(17)  | 36(5)  |
| O(52B) | 8450(20)  | 10210(30) | -1340(20) | 68(9)  |
| C(53B) | 8520(20)  | 9360(30)  | -910(20)  | 37(6)  |
| C(54B) | 9070(30)  | 8270(30)  | -740(20)  | 38(6)  |
| C(55B) | 8930(30)  | 7510(40)  | -270(30)  | 30(6)  |
| C(66B) | 5727(15)  | 4140(20)  | -660(20)  | 26(5)  |

|        |          |          |           |       |
|--------|----------|----------|-----------|-------|
| C(67B) | 5276(17) | 3217(19) | -490(20)  | 38(6) |
| C(68B) | 4379(17) | 3357(19) | -600(20)  | 40(6) |
| C(69B) | 3934(14) | 4420(20) | -873(19)  | 41(6) |
| C(70B) | 4384(16) | 5350(18) | -1045(18) | 40(6) |
| C(71B) | 5281(17) | 5210(20) | -940(19)  | 31(5) |
| C(72B) | 7515(19) | 3360(30) | 704(13)   | 40(6) |
| C(73B) | 7257(19) | 3850(30) | 1306(17)  | 43(6) |
| C(74B) | 7711(18) | 3530(30) | 2177(15)  | 43(6) |
| C(75B) | 8422(16) | 2720(20) | 2445(11)  | 40(6) |
| C(76B) | 8679(15) | 2230(20) | 1842(14)  | 44(6) |
| C(77B) | 8226(17) | 2550(20) | 971(13)   | 40(6) |

---

**Table S15.** Bond lengths [Å] and angles [°] for spiro- $\delta$ -lactam **21**.

|              |           |               |           |
|--------------|-----------|---------------|-----------|
| O(1)-C(2)    | 1.235(12) | C(18)-C(19)   | 1.545(13) |
| C(2)-N(3)    | 1.329(11) | C(18)-H(18)   | 1.0000    |
| C(2)-C(7)    | 1.540(12) | C(19)-C(10)   | 1.47(3)   |
| N(3)-C(4)    | 1.450(14) | C(19)-C(10B)  | 1.61(6)   |
| N(3)-H(3)    | 0.8800    | C(19)-H(19A)  | 0.9900    |
| C(4)-C(5)    | 1.530(14) | C(19)-H(19B)  | 0.9900    |
| C(4)-H(4A)   | 0.9900    | O(20)-Si(21)  | 1.647(8)  |
| C(4)-H(4B)   | 0.9900    | Si(21)-C(26B) | 1.83(3)   |
| C(5)-C(6)    | 1.515(14) | Si(21)-C(32B) | 1.86(2)   |
| C(5)-H(5A)   | 0.9900    | Si(21)-C(22)  | 1.887(11) |
| C(5)-H(5B)   | 0.9900    | Si(21)-C(32)  | 1.935(11) |
| C(6)-C(7)    | 1.537(13) | Si(21)-C(26)  | 1.955(14) |
| C(6)-H(6A)   | 0.9900    | C(22)-C(23)   | 1.509(17) |
| C(6)-H(6B)   | 0.9900    | C(22)-C(25)   | 1.514(18) |
| C(7)-C(17)   | 1.577(15) | C(22)-C(24)   | 1.555(17) |
| C(7)-C(8)    | 1.583(12) | C(23)-H(23A)  | 0.9800    |
| C(8)-C(10B)  | 1.30(5)   | C(23)-H(23B)  | 0.9800    |
| C(8)-C(9)    | 1.521(16) | C(23)-H(23C)  | 0.9800    |
| C(8)-C(10)   | 1.62(2)   | C(24)-H(24A)  | 0.9800    |
| C(8)-H(8)    | 1.0000    | C(24)-H(24B)  | 0.9800    |
| C(9)-H(9A)   | 0.9800    | C(24)-H(24C)  | 0.9800    |
| C(9)-H(9B)   | 0.9800    | C(25)-H(25A)  | 0.9800    |
| C(9)-H(9C)   | 0.9800    | C(25)-H(25B)  | 0.9800    |
| C(16)-C(15)  | 1.46(4)   | C(25)-H(25C)  | 0.9800    |
| C(16)-C(17)  | 1.547(15) | C(56)-C(55B)  | 1.36(4)   |
| C(16)-C(15B) | 1.57(7)   | C(56)-C(57)   | 1.546(14) |
| C(16)-H(16A) | 0.9900    | C(56)-C(55)   | 1.57(4)   |
| C(16)-H(16B) | 0.9900    | C(56)-H(56A)  | 0.9900    |
| C(17)-C(18)  | 1.519(15) | C(56)-H(56B)  | 0.9900    |
| C(17)-H(17)  | 1.0000    | C(57)-C(58)   | 1.532(13) |
| C(18)-O(20)  | 1.420(13) | C(57)-C(47B)  | 1.54(3)   |
|              |           | C(57)-C(47)   | 1.62(3)   |
|              |           | C(57)-H(57)   | 1.04(13)  |
|              |           | C(58)-O(60)   | 1.419(13) |
|              |           | C(58)-C(59)   | 1.551(16) |

|               |           |              |           |
|---------------|-----------|--------------|-----------|
| C(58)-H(58)   | 0.99(12)  | C(28)-H(28)  | 0.9500    |
| C(59)-C(50)   | 1.45(5)   | C(29)-C(30)  | 1.3900    |
| C(59)-C(50B)  | 1.55(6)   | C(29)-H(29)  | 0.9500    |
| C(59)-H(59A)  | 0.9900    | C(30)-C(31)  | 1.3900    |
| C(59)-H(59B)  | 0.9900    | C(30)-H(30)  | 0.9500    |
| O(60)-Si(61)  | 1.643(9)  | C(31)-H(31)  | 0.9500    |
| Si(61)-C(66B) | 1.81(2)   | C(32)-C(33)  | 1.3900    |
| Si(61)-C(72)  | 1.850(13) | C(32)-C(37)  | 1.3900    |
| Si(61)-C(62)  | 1.881(12) | C(33)-C(34)  | 1.3900    |
| Si(61)-C(66)  | 1.978(16) | C(33)-H(33)  | 0.9500    |
| Si(61)-C(72B) | 1.993(17) | C(34)-C(35)  | 1.3900    |
| C(62)-C(65)   | 1.50(2)   | C(34)-H(34)  | 0.9500    |
| C(62)-C(63)   | 1.53(2)   | C(35)-C(36)  | 1.3900    |
| C(62)-C(64)   | 1.59(2)   | C(35)-H(35)  | 0.9500    |
| C(63)-H(63A)  | 0.9800    | C(36)-C(37)  | 1.3900    |
| C(63)-H(63B)  | 0.9800    | C(36)-H(36)  | 0.9500    |
| C(63)-H(63C)  | 0.9800    | C(37)-H(37)  | 0.9500    |
| C(64)-H(64A)  | 0.9800    | O(41)-C(42)  | 1.226(18) |
| C(64)-H(64B)  | 0.9800    | C(42)-N(43)  | 1.307(19) |
| C(64)-H(64C)  | 0.9800    | C(42)-C(47)  | 1.547(19) |
| C(65)-H(65A)  | 0.9800    | N(43)-C(44)  | 1.457(19) |
| C(65)-H(65B)  | 0.9800    | N(43)-H(43)  | 0.8800    |
| C(65)-H(65C)  | 0.9800    | C(44)-C(45)  | 1.54(2)   |
| C(10)-O(11)   | 1.42(3)   | C(44)-H(44A) | 0.9900    |
| C(10)-C(15)   | 1.47(5)   | C(44)-H(44B) | 0.9900    |
| O(11)-C(13)   | 1.30(3)   | C(45)-C(46)  | 1.50(2)   |
| O(12)-C(13)   | 1.21(3)   | C(45)-H(45A) | 0.9900    |
| C(13)-C(14)   | 1.55(4)   | C(45)-H(45B) | 0.9900    |
| C(14)-C(15)   | 1.33(5)   | C(46)-C(47)  | 1.551(19) |
| C(14)-H(14)   | 0.9500    | C(46)-H(46A) | 0.9900    |
| C(26)-C(27)   | 1.3900    | C(46)-H(46B) | 0.9900    |
| C(26)-C(31)   | 1.3900    | C(47)-C(48)  | 1.58(2)   |
| C(27)-C(28)   | 1.3900    | C(48)-C(49)  | 1.53(2)   |
| C(27)-H(27)   | 0.9500    | C(48)-C(50)  | 1.57(5)   |
| C(28)-C(29)   | 1.3900    | C(48)-H(48)  | 1.0000    |



|               |          |               |         |
|---------------|----------|---------------|---------|
| C(49)-H(49A)  | 0.9800   | O(12B)-C(13B) | 1.22(5) |
| C(49)-H(49B)  | 0.9800   | C(13B)-C(14B) | 1.41(6) |
| C(49)-H(49C)  | 0.9800   | C(14B)-C(15B) | 1.41(9) |
| C(50)-C(55)   | 1.39(7)  | C(14B)-H(14G) | 0.9500  |
| C(50)-O(51)   | 1.39(6)  | C(26B)-C(27B) | 1.3900  |
| O(51)-C(53)   | 1.37(4)  | C(26B)-C(31B) | 1.3900  |
| O(52)-C(53)   | 1.19(3)  | C(27B)-C(28B) | 1.3900  |
| C(53)-C(54)   | 1.45(4)  | C(27B)-H(27G) | 0.9500  |
| C(54)-C(55)   | 1.35(5)  | C(28B)-C(29B) | 1.3900  |
| C(54)-H(54)   | 0.9500   | C(28B)-H(28G) | 0.9500  |
| C(66)-C(67)   | 1.3900   | C(29B)-C(30B) | 1.3900  |
| C(66)-C(71)   | 1.3900   | C(29B)-H(29G) | 0.9500  |
| C(67)-C(68)   | 1.3900   | C(30B)-C(31B) | 1.3900  |
| C(67)-H(67)   | 0.9500   | C(30B)-H(30G) | 0.9500  |
| C(68)-C(69)   | 1.3900   | C(31B)-H(31G) | 0.9500  |
| C(68)-H(68)   | 0.9500   | C(32B)-C(33B) | 1.3900  |
| C(69)-C(70)   | 1.3900   | C(32B)-C(37B) | 1.3900  |
| C(69)-H(69)   | 0.9500   | C(33B)-C(34B) | 1.3900  |
| C(70)-C(71)   | 1.3900   | C(33B)-H(33G) | 0.9500  |
| C(70)-H(70)   | 0.9500   | C(34B)-C(35B) | 1.3900  |
| C(71)-H(71)   | 0.9500   | C(34B)-H(34G) | 0.9500  |
| C(72)-C(73)   | 1.3900   | C(35B)-C(36B) | 1.3900  |
| C(72)-C(77)   | 1.3900   | C(35B)-H(35G) | 0.9500  |
| C(73)-C(74)   | 1.3900   | C(36B)-C(37B) | 1.3900  |
| C(73)-H(73)   | 0.9500   | C(36B)-H(36G) | 0.9500  |
| C(74)-C(75)   | 1.3900   | C(37B)-H(37G) | 0.9500  |
| C(74)-H(74)   | 0.9500   | O(41B)-C(42B) | 1.24(2) |
| C(75)-C(76)   | 1.3900   | C(42B)-N(43B) | 1.31(2) |
| C(75)-H(75)   | 0.9500   | C(42B)-C(47B) | 1.54(2) |
| C(76)-C(77)   | 1.3900   | N(43B)-C(44B) | 1.45(2) |
| C(76)-H(76)   | 0.9500   | N(43B)-H(43G) | 0.8800  |
| C(77)-H(77)   | 0.9500   | C(44B)-C(45B) | 1.52(2) |
| C(10B)-O(11B) | 1.56(6)  | C(44B)-H(44G) | 0.9900  |
| C(10B)-C(15B) | 1.58(10) | C(44B)-H(44H) | 0.9900  |
| O(11B)-C(13B) | 1.57(6)  | C(45B)-C(46B) | 1.52(2) |

|               |         |                  |          |
|---------------|---------|------------------|----------|
| C(45B)-H(45G) | 0.9900  | C(74B)-H(74G)    | 0.9500   |
| C(45B)-H(45H) | 0.9900  | C(75B)-C(76B)    | 1.3900   |
| C(46B)-C(47B) | 1.54(2) | C(75B)-H(75G)    | 0.9500   |
| C(46B)-H(46G) | 0.9900  | C(76B)-C(77B)    | 1.3900   |
| C(46B)-H(46H) | 0.9900  | C(76B)-H(76G)    | 0.9500   |
| C(47B)-C(48B) | 1.57(2) | C(77B)-H(77G)    | 0.9500   |
| C(48B)-C(49B) | 1.52(3) |                  |          |
| C(48B)-C(50B) | 1.54(5) | O(1)-C(2)-N(3)   | 120.8(9) |
| C(48B)-H(48G) | 1.0000  | O(1)-C(2)-C(7)   | 120.8(8) |
| C(49B)-H(49G) | 0.9800  | N(3)-C(2)-C(7)   | 118.4(9) |
| C(49B)-H(49H) | 0.9800  | C(2)-N(3)-C(4)   | 129.1(9) |
| C(49B)-H(49I) | 0.9800  | C(2)-N(3)-H(3)   | 115.4    |
| C(50B)-O(51B) | 1.56(6) | C(4)-N(3)-H(3)   | 115.4    |
| C(50B)-C(55B) | 1.62(8) | N(3)-C(4)-C(5)   | 112.2(8) |
| O(51B)-C(53B) | 1.38(4) | N(3)-C(4)-H(4A)  | 109.2    |
| O(52B)-C(53B) | 1.19(4) | C(5)-C(4)-H(4A)  | 109.2    |
| C(53B)-C(54B) | 1.49(5) | N(3)-C(4)-H(4B)  | 109.2    |
| C(54B)-C(55B) | 1.27(6) | C(5)-C(4)-H(4B)  | 109.2    |
| C(54B)-H(54G) | 0.9500  | H(4A)-C(4)-H(4B) | 107.9    |
| C(66B)-C(67B) | 1.3900  | C(6)-C(5)-C(4)   | 109.0(9) |
| C(66B)-C(71B) | 1.3900  | C(6)-C(5)-H(5A)  | 109.9    |
| C(67B)-C(68B) | 1.3900  | C(4)-C(5)-H(5A)  | 109.9    |
| C(67B)-H(67G) | 0.9500  | C(6)-C(5)-H(5B)  | 109.9    |
| C(68B)-C(69B) | 1.3900  | C(4)-C(5)-H(5B)  | 109.9    |
| C(68B)-H(68G) | 0.9500  | H(5A)-C(5)-H(5B) | 108.3    |
| C(69B)-C(70B) | 1.3900  | C(5)-C(6)-C(7)   | 111.5(9) |
| C(69B)-H(69G) | 0.9500  | C(5)-C(6)-H(6A)  | 109.3    |
| C(70B)-C(71B) | 1.3900  | C(7)-C(6)-H(6A)  | 109.3    |
| C(70B)-H(70G) | 0.9500  | C(5)-C(6)-H(6B)  | 109.3    |
| C(71B)-H(71G) | 0.9500  | C(7)-C(6)-H(6B)  | 109.3    |
| C(72B)-C(73B) | 1.3900  | H(6A)-C(6)-H(6B) | 108.0    |
| C(72B)-C(77B) | 1.3900  | C(6)-C(7)-C(2)   | 107.9(8) |
| C(73B)-C(74B) | 1.3900  | C(6)-C(7)-C(17)  | 111.2(8) |
| C(73B)-H(73G) | 0.9500  | C(2)-C(7)-C(17)  | 107.8(8) |
| C(74B)-C(75B) | 1.3900  | C(6)-C(7)-C(8)   | 112.7(8) |

|                     |           |                      |           |
|---------------------|-----------|----------------------|-----------|
| C(2)-C(7)-C(8)      | 108.8(8)  | C(10)-C(19)-C(18)    | 110.0(12) |
| C(17)-C(7)-C(8)     | 108.4(8)  | C(18)-C(19)-C(10B)   | 107(2)    |
| C(10B)-C(8)-C(9)    | 113(2)    | C(10)-C(19)-H(19A)   | 109.7     |
| C(10B)-C(8)-C(7)    | 109(2)    | C(18)-C(19)-H(19A)   | 109.7     |
| C(9)-C(8)-C(7)      | 115.7(9)  | C(10)-C(19)-H(19B)   | 109.7     |
| C(9)-C(8)-C(10)     | 114.4(13) | C(18)-C(19)-H(19B)   | 109.7     |
| C(7)-C(8)-C(10)     | 106.0(11) | H(19A)-C(19)-H(19B)  | 108.2     |
| C(9)-C(8)-H(8)      | 106.7     | C(18)-O(20)-Si(21)   | 128.0(7)  |
| C(7)-C(8)-H(8)      | 106.7     | O(20)-Si(21)-C(26B)  | 105.0(12) |
| C(10)-C(8)-H(8)     | 106.7     | O(20)-Si(21)-C(32B)  | 114.7(13) |
| C(8)-C(9)-H(9A)     | 109.5     | C(26B)-Si(21)-C(32B) | 110.4(17) |
| C(8)-C(9)-H(9B)     | 109.5     | O(20)-Si(21)-C(22)   | 103.3(5)  |
| H(9A)-C(9)-H(9B)    | 109.5     | C(26B)-Si(21)-C(22)  | 113.8(15) |
| C(8)-C(9)-H(9C)     | 109.5     | C(32B)-Si(21)-C(22)  | 109.5(12) |
| H(9A)-C(9)-H(9C)    | 109.5     | O(20)-Si(21)-C(32)   | 107.7(6)  |
| H(9B)-C(9)-H(9C)    | 109.5     | C(22)-Si(21)-C(32)   | 118.4(7)  |
| C(15)-C(16)-C(17)   | 105.9(19) | O(20)-Si(21)-C(26)   | 109.6(6)  |
| C(17)-C(16)-C(15B)  | 104(3)    | C(22)-Si(21)-C(26)   | 108.0(7)  |
| C(15)-C(16)-H(16A)  | 110.5     | C(32)-Si(21)-C(26)   | 109.6(8)  |
| C(17)-C(16)-H(16A)  | 110.5     | C(23)-C(22)-C(25)    | 108.5(12) |
| C(15)-C(16)-H(16B)  | 110.5     | C(23)-C(22)-C(24)    | 108.6(10) |
| C(17)-C(16)-H(16B)  | 110.5     | C(25)-C(22)-C(24)    | 107.3(11) |
| H(16A)-C(16)-H(16B) | 108.7     | C(23)-C(22)-Si(21)   | 110.9(8)  |
| C(18)-C(17)-C(16)   | 108.1(8)  | C(25)-C(22)-Si(21)   | 108.8(8)  |
| C(18)-C(17)-C(7)    | 112.1(8)  | C(24)-C(22)-Si(21)   | 112.6(9)  |
| C(16)-C(17)-C(7)    | 109.2(9)  | C(22)-C(23)-H(23A)   | 109.5     |
| C(18)-C(17)-H(17)   | 109.1     | C(22)-C(23)-H(23B)   | 109.5     |
| C(16)-C(17)-H(17)   | 109.1     | H(23A)-C(23)-H(23B)  | 109.5     |
| C(7)-C(17)-H(17)    | 109.1     | C(22)-C(23)-H(23C)   | 109.5     |
| O(20)-C(18)-C(17)   | 110.3(8)  | H(23A)-C(23)-H(23C)  | 109.5     |
| O(20)-C(18)-C(19)   | 108.8(8)  | H(23B)-C(23)-H(23C)  | 109.5     |
| C(17)-C(18)-C(19)   | 108.9(9)  | C(22)-C(24)-H(24A)   | 109.5     |
| O(20)-C(18)-H(18)   | 109.6     | C(22)-C(24)-H(24B)   | 109.5     |
| C(17)-C(18)-H(18)   | 109.6     | H(24A)-C(24)-H(24B)  | 109.5     |
| C(19)-C(18)-H(18)   | 109.6     | C(22)-C(24)-H(24C)   | 109.5     |

|                     |           |                      |           |
|---------------------|-----------|----------------------|-----------|
| H(24A)-C(24)-H(24C) | 109.5     | C(58)-C(59)-H(59B)   | 109.6     |
| H(24B)-C(24)-H(24C) | 109.5     | H(59A)-C(59)-H(59B)  | 108.1     |
| C(22)-C(25)-H(25A)  | 109.5     | C(58)-O(60)-Si(61)   | 125.3(7)  |
| C(22)-C(25)-H(25B)  | 109.5     | O(60)-Si(61)-C(66B)  | 112.3(9)  |
| H(25A)-C(25)-H(25B) | 109.5     | O(60)-Si(61)-C(72)   | 107.6(9)  |
| C(22)-C(25)-H(25C)  | 109.5     | O(60)-Si(61)-C(62)   | 103.3(5)  |
| H(25A)-C(25)-H(25C) | 109.5     | C(66B)-Si(61)-C(62)  | 109.1(11) |
| H(25B)-C(25)-H(25C) | 109.5     | C(72)-Si(61)-C(62)   | 116.0(9)  |
| C(55B)-C(56)-C(57)  | 111(2)    | O(60)-Si(61)-C(66)   | 106.5(7)  |
| C(57)-C(56)-C(55)   | 103.6(17) | C(72)-Si(61)-C(66)   | 108.9(10) |
| C(57)-C(56)-H(56A)  | 111.0     | C(62)-Si(61)-C(66)   | 113.8(8)  |
| C(55)-C(56)-H(56A)  | 111.0     | O(60)-Si(61)-C(72B)  | 110.6(11) |
| C(57)-C(56)-H(56B)  | 111.0     | C(66B)-Si(61)-C(72B) | 101.7(13) |
| C(55)-C(56)-H(56B)  | 111.0     | C(62)-Si(61)-C(72B)  | 120.1(10) |
| H(56A)-C(56)-H(56B) | 109.0     | C(65)-C(62)-C(63)    | 111.1(12) |
| C(58)-C(57)-C(47B)  | 114.2(11) | C(65)-C(62)-C(64)    | 107.5(11) |
| C(58)-C(57)-C(56)   | 108.6(8)  | C(63)-C(62)-C(64)    | 107.4(13) |
| C(47B)-C(57)-C(56)  | 111.1(11) | C(65)-C(62)-Si(61)   | 113.6(10) |
| C(58)-C(57)-C(47)   | 105.2(10) | C(63)-C(62)-Si(61)   | 111.1(9)  |
| C(56)-C(57)-C(47)   | 108.0(11) | C(64)-C(62)-Si(61)   | 105.6(9)  |
| C(58)-C(57)-H(57)   | 113(7)    | C(62)-C(63)-H(63A)   | 109.5     |
| C(47B)-C(57)-H(57)  | 106(7)    | C(62)-C(63)-H(63B)   | 109.5     |
| C(56)-C(57)-H(57)   | 103(7)    | H(63A)-C(63)-H(63B)  | 109.5     |
| C(47)-C(57)-H(57)   | 118(7)    | C(62)-C(63)-H(63C)   | 109.5     |
| O(60)-C(58)-C(57)   | 109.0(8)  | H(63A)-C(63)-H(63C)  | 109.5     |
| O(60)-C(58)-C(59)   | 107.4(8)  | H(63B)-C(63)-H(63C)  | 109.5     |
| C(57)-C(58)-C(59)   | 109.6(8)  | C(62)-C(64)-H(64A)   | 109.5     |
| O(60)-C(58)-H(58)   | 97(7)     | C(62)-C(64)-H(64B)   | 109.5     |
| C(57)-C(58)-H(58)   | 115(7)    | H(64A)-C(64)-H(64B)  | 109.5     |
| C(59)-C(58)-H(58)   | 118(7)    | C(62)-C(64)-H(64C)   | 109.5     |
| C(50)-C(59)-C(58)   | 110(2)    | H(64A)-C(64)-H(64C)  | 109.5     |
| C(50B)-C(59)-C(58)  | 105(2)    | H(64B)-C(64)-H(64C)  | 109.5     |
| C(50)-C(59)-H(59A)  | 109.6     | C(62)-C(65)-H(65A)   | 109.5     |
| C(58)-C(59)-H(59A)  | 109.6     | C(62)-C(65)-H(65B)   | 109.5     |
| C(50)-C(59)-H(59B)  | 109.6     | H(65A)-C(65)-H(65B)  | 109.5     |

|                     |           |                     |           |
|---------------------|-----------|---------------------|-----------|
| C(62)-C(65)-H(65C)  | 109.5     | C(30)-C(31)-H(31)   | 120.0     |
| H(65A)-C(65)-H(65C) | 109.5     | C(26)-C(31)-H(31)   | 120.0     |
| H(65B)-C(65)-H(65C) | 109.5     | C(33)-C(32)-C(37)   | 120.0     |
| O(11)-C(10)-C(15)   | 106(2)    | C(33)-C(32)-Si(21)  | 118.3(9)  |
| O(11)-C(10)-C(19)   | 117.8(19) | C(37)-C(32)-Si(21)  | 121.6(9)  |
| C(15)-C(10)-C(19)   | 109.4(19) | C(32)-C(33)-C(34)   | 120.0     |
| O(11)-C(10)-C(8)    | 105.3(17) | C(32)-C(33)-H(33)   | 120.0     |
| C(15)-C(10)-C(8)    | 111(2)    | C(34)-C(33)-H(33)   | 120.0     |
| C(19)-C(10)-C(8)    | 107.2(15) | C(35)-C(34)-C(33)   | 120.0     |
| C(13)-O(11)-C(10)   | 110.9(19) | C(35)-C(34)-H(34)   | 120.0     |
| O(12)-C(13)-O(11)   | 124(3)    | C(33)-C(34)-H(34)   | 120.0     |
| O(12)-C(13)-C(14)   | 128(3)    | C(36)-C(35)-C(34)   | 120.0     |
| O(11)-C(13)-C(14)   | 107(2)    | C(36)-C(35)-H(35)   | 120.0     |
| C(15)-C(14)-C(13)   | 106(3)    | C(34)-C(35)-H(35)   | 120.0     |
| C(15)-C(14)-H(14)   | 126.9     | C(35)-C(36)-C(37)   | 120.0     |
| C(13)-C(14)-H(14)   | 126.9     | C(35)-C(36)-H(36)   | 120.0     |
| C(14)-C(15)-C(16)   | 135(4)    | C(37)-C(36)-H(36)   | 120.0     |
| C(14)-C(15)-C(10)   | 109(3)    | C(36)-C(37)-C(32)   | 120.0     |
| C(16)-C(15)-C(10)   | 116(3)    | C(36)-C(37)-H(37)   | 120.0     |
| C(27)-C(26)-C(31)   | 120.0     | C(32)-C(37)-H(37)   | 120.0     |
| C(27)-C(26)-Si(21)  | 121.1(9)  | O(41)-C(42)-N(43)   | 122(2)    |
| C(31)-C(26)-Si(21)  | 118.7(9)  | O(41)-C(42)-C(47)   | 119.4(18) |
| C(26)-C(27)-C(28)   | 120.0     | N(43)-C(42)-C(47)   | 118.9(16) |
| C(26)-C(27)-H(27)   | 120.0     | C(42)-N(43)-C(44)   | 130.4(17) |
| C(28)-C(27)-H(27)   | 120.0     | C(42)-N(43)-H(43)   | 114.8     |
| C(29)-C(28)-C(27)   | 120.0     | C(44)-N(43)-H(43)   | 114.8     |
| C(29)-C(28)-H(28)   | 120.0     | N(43)-C(44)-C(45)   | 109.4(15) |
| C(27)-C(28)-H(28)   | 120.0     | N(43)-C(44)-H(44A)  | 109.8     |
| C(30)-C(29)-C(28)   | 120.0     | C(45)-C(44)-H(44A)  | 109.8     |
| C(30)-C(29)-H(29)   | 120.0     | N(43)-C(44)-H(44B)  | 109.8     |
| C(28)-C(29)-H(29)   | 120.0     | C(45)-C(44)-H(44B)  | 109.8     |
| C(29)-C(30)-C(31)   | 120.0     | H(44A)-C(44)-H(44B) | 108.2     |
| C(29)-C(30)-H(30)   | 120.0     | C(46)-C(45)-C(44)   | 110.4(17) |
| C(31)-C(30)-H(30)   | 120.0     | C(46)-C(45)-H(45A)  | 109.6     |
| C(30)-C(31)-C(26)   | 120.0     | C(44)-C(45)-H(45A)  | 109.6     |

|                     |           |                    |           |
|---------------------|-----------|--------------------|-----------|
| C(46)-C(45)-H(45B)  | 109.6     | O(52)-C(53)-C(54)  | 130(3)    |
| C(44)-C(45)-H(45B)  | 109.6     | O(51)-C(53)-C(54)  | 107(2)    |
| H(45A)-C(45)-H(45B) | 108.1     | C(55)-C(54)-C(53)  | 106(3)    |
| C(45)-C(46)-C(47)   | 109.4(16) | C(55)-C(54)-H(54)  | 126.8     |
| C(45)-C(46)-H(46A)  | 109.8     | C(53)-C(54)-H(54)  | 126.8     |
| C(47)-C(46)-H(46A)  | 109.8     | C(54)-C(55)-C(50)  | 110(3)    |
| C(45)-C(46)-H(46B)  | 109.8     | C(54)-C(55)-C(56)  | 134(3)    |
| C(47)-C(46)-H(46B)  | 109.8     | C(50)-C(55)-C(56)  | 115(4)    |
| H(46A)-C(46)-H(46B) | 108.2     | C(67)-C(66)-C(71)  | 120.0     |
| C(42)-C(47)-C(46)   | 106.7(15) | C(67)-C(66)-Si(61) | 121.7(11) |
| C(42)-C(47)-C(48)   | 108.5(16) | C(71)-C(66)-Si(61) | 118.3(11) |
| C(46)-C(47)-C(48)   | 111.3(15) | C(68)-C(67)-C(66)  | 120.0     |
| C(42)-C(47)-C(57)   | 107.0(17) | C(68)-C(67)-H(67)  | 120.0     |
| C(46)-C(47)-C(57)   | 113.1(16) | C(66)-C(67)-H(67)  | 120.0     |
| C(48)-C(47)-C(57)   | 110.1(14) | C(67)-C(68)-C(69)  | 120.0     |
| C(49)-C(48)-C(50)   | 116(3)    | C(67)-C(68)-H(68)  | 120.0     |
| C(49)-C(48)-C(47)   | 114.8(18) | C(69)-C(68)-H(68)  | 120.0     |
| C(50)-C(48)-C(47)   | 104(2)    | C(70)-C(69)-C(68)  | 120.0     |
| C(49)-C(48)-H(48)   | 107.2     | C(70)-C(69)-H(69)  | 120.0     |
| C(50)-C(48)-H(48)   | 107.2     | C(68)-C(69)-H(69)  | 120.0     |
| C(47)-C(48)-H(48)   | 107.2     | C(69)-C(70)-C(71)  | 120.0     |
| C(48)-C(49)-H(49A)  | 109.5     | C(69)-C(70)-H(70)  | 120.0     |
| C(48)-C(49)-H(49B)  | 109.5     | C(71)-C(70)-H(70)  | 120.0     |
| H(49A)-C(49)-H(49B) | 109.5     | C(70)-C(71)-C(66)  | 120.0     |
| C(48)-C(49)-H(49C)  | 109.5     | C(70)-C(71)-H(71)  | 120.0     |
| H(49A)-C(49)-H(49C) | 109.5     | C(66)-C(71)-H(71)  | 120.0     |
| H(49B)-C(49)-H(49C) | 109.5     | C(73)-C(72)-C(77)  | 120.0     |
| C(55)-C(50)-O(51)   | 106(4)    | C(73)-C(72)-Si(61) | 117.1(11) |
| C(55)-C(50)-C(59)   | 115(4)    | C(77)-C(72)-Si(61) | 122.6(11) |
| O(51)-C(50)-C(59)   | 123(3)    | C(72)-C(73)-C(74)  | 120.0     |
| C(55)-C(50)-C(48)   | 111(3)    | C(72)-C(73)-H(73)  | 120.0     |
| O(51)-C(50)-C(48)   | 97(3)     | C(74)-C(73)-H(73)  | 120.0     |
| C(59)-C(50)-C(48)   | 104(3)    | C(75)-C(74)-C(73)  | 120.0     |
| C(53)-O(51)-C(50)   | 109(3)    | C(75)-C(74)-H(74)  | 120.0     |
| O(52)-C(53)-O(51)   | 123(3)    | C(73)-C(74)-H(74)  | 120.0     |

|                      |        |                      |           |
|----------------------|--------|----------------------|-----------|
| C(76)-C(75)-C(74)    | 120.0  | C(28B)-C(29B)-H(29G) | 120.0     |
| C(76)-C(75)-H(75)    | 120.0  | C(30B)-C(29B)-H(29G) | 120.0     |
| C(74)-C(75)-H(75)    | 120.0  | C(31B)-C(30B)-C(29B) | 120.0     |
| C(77)-C(76)-C(75)    | 120.0  | C(31B)-C(30B)-H(30G) | 120.0     |
| C(77)-C(76)-H(76)    | 120.0  | C(29B)-C(30B)-H(30G) | 120.0     |
| C(75)-C(76)-H(76)    | 120.0  | C(30B)-C(31B)-C(26B) | 120.0     |
| C(76)-C(77)-C(72)    | 120.0  | C(30B)-C(31B)-H(31G) | 120.0     |
| C(76)-C(77)-H(77)    | 120.0  | C(26B)-C(31B)-H(31G) | 120.0     |
| C(72)-C(77)-H(77)    | 120.0  | C(33B)-C(32B)-C(37B) | 120.0     |
| C(8)-C(10B)-O(11B)   | 126(4) | C(33B)-C(32B)-Si(21) | 117.3(17) |
| C(8)-C(10B)-C(15B)   | 112(4) | C(37B)-C(32B)-Si(21) | 120.8(18) |
| O(11B)-C(10B)-C(15B) | 102(4) | C(32B)-C(33B)-C(34B) | 120.0     |
| C(8)-C(10B)-C(19)    | 118(4) | C(32B)-C(33B)-H(33G) | 120.0     |
| O(11B)-C(10B)-C(19)  | 93(3)  | C(34B)-C(33B)-H(33G) | 120.0     |
| C(15B)-C(10B)-C(19)  | 103(4) | C(35B)-C(34B)-C(33B) | 120.0     |
| C(10B)-O(11B)-C(13B) | 102(3) | C(35B)-C(34B)-H(34G) | 120.0     |
| O(12B)-C(13B)-C(14B) | 128(4) | C(33B)-C(34B)-H(34G) | 120.0     |
| O(12B)-C(13B)-O(11B) | 111(4) | C(34B)-C(35B)-C(36B) | 120.0     |
| C(14B)-C(13B)-O(11B) | 111(3) | C(34B)-C(35B)-H(35G) | 120.0     |
| C(15B)-C(14B)-C(13B) | 104(5) | C(36B)-C(35B)-H(35G) | 120.0     |
| C(15B)-C(14B)-H(14G) | 128.2  | C(37B)-C(36B)-C(35B) | 120.0     |
| C(13B)-C(14B)-H(14G) | 128.2  | C(37B)-C(36B)-H(36G) | 120.0     |
| C(14B)-C(15B)-C(16)  | 139(6) | C(35B)-C(36B)-H(36G) | 120.0     |
| C(14B)-C(15B)-C(10B) | 109(5) | C(36B)-C(37B)-C(32B) | 120.0     |
| C(16)-C(15B)-C(10B)  | 111(5) | C(36B)-C(37B)-H(37G) | 120.0     |
| C(27B)-C(26B)-C(31B) | 120.0  | C(32B)-C(37B)-H(37G) | 120.0     |
| C(27B)-C(26B)-Si(21) | 121(2) | O(41B)-C(42B)-N(43B) | 123(2)    |
| C(31B)-C(26B)-Si(21) | 118(2) | O(41B)-C(42B)-C(47B) | 119(2)    |
| C(26B)-C(27B)-C(28B) | 120.0  | N(43B)-C(42B)-C(47B) | 116.1(18) |
| C(26B)-C(27B)-H(27G) | 120.0  | C(42B)-N(43B)-C(44B) | 131(2)    |
| C(28B)-C(27B)-H(27G) | 120.0  | C(42B)-N(43B)-H(43G) | 114.7     |
| C(29B)-C(28B)-C(27B) | 120.0  | C(44B)-N(43B)-H(43G) | 114.7     |
| C(29B)-C(28B)-H(28G) | 120.0  | N(43B)-C(44B)-C(45B) | 112.7(18) |
| C(27B)-C(28B)-H(28G) | 120.0  | N(43B)-C(44B)-H(44G) | 109.0     |
| C(28B)-C(29B)-C(30B) | 120.0  | C(45B)-C(44B)-H(44G) | 109.0     |

|                      |           |                      |           |
|----------------------|-----------|----------------------|-----------|
| N(43B)-C(44B)-H(44H) | 109.0     | C(59)-C(50B)-O(51B)  | 99(3)     |
| C(45B)-C(44B)-H(44H) | 109.0     | C(48B)-C(50B)-C(55B) | 109(4)    |
| H(44G)-C(44B)-H(44H) | 107.8     | C(59)-C(50B)-C(55B)  | 101(4)    |
| C(46B)-C(45B)-C(44B) | 107.3(19) | O(51B)-C(50B)-C(55B) | 102(4)    |
| C(46B)-C(45B)-H(45G) | 110.2     | (53B)-O(51B)-C(50B)  | 107(3)    |
| C(44B)-C(45B)-H(45G) | 110.2     | O(52B)-C(53B)-O(51B) | 118(3)    |
| C(46B)-C(45B)-H(45H) | 110.2     | O(52B)-C(53B)-C(54B) | 133(3)    |
| C(44B)-C(45B)-H(45H) | 110.2     | O(51B)-C(53B)-C(54B) | 107(3)    |
| H(45G)-C(45B)-H(45H) | 108.5     | C(55B)-C(54B)-C(53B) | 115(4)    |
| C(45B)-C(46B)-C(47B) | 111.5(18) | C(55B)-C(54B)-H(54G) | 122.3     |
| C(45B)-C(46B)-H(46G) | 109.3     | C(53B)-C(54B)-H(54G) | 122.3     |
| C(47B)-C(46B)-H(46G) | 109.3     | C(54B)-C(55B)-C(56)  | 143(4)    |
| C(45B)-C(46B)-H(46H) | 109.3     | C(54B)-C(55B)-C(50B) | 106(4)    |
| C(47B)-C(46B)-H(46H) | 109.3     | C(56)-C(55B)-C(50B)  | 112(4)    |
| H(46G)-C(46B)-H(46H) | 108.0     | C(67B)-C(66B)-C(71B) | 120.0     |
| C(57)-C(47B)-C(46B)  | 111.6(18) | C(67B)-C(66B)-Si(61) | 120.5(14) |
| C(57)-C(47B)-C(42B)  | 111(2)    | C(71B)-C(66B)-Si(61) | 119.5(14) |
| C(46B)-C(47B)-C(42B) | 108.9(17) | C(68B)-C(67B)-C(66B) | 120.0     |
| C(57)-C(47B)-C(48B)  | 101.8(17) | C(68B)-C(67B)-H(67G) | 120.0     |
| C(46B)-C(47B)-C(48B) | 112.2(18) | C(66B)-C(67B)-H(67G) | 120.0     |
| C(42B)-C(47B)-C(48B) | 111.5(19) | C(67B)-C(68B)-C(69B) | 120.0     |
| C(49B)-C(48B)-C(50B) | 107(3)    | C(67B)-C(68B)-H(68G) | 120.0     |
| C(49B)-C(48B)-C(47B) | 117(2)    | C(69B)-C(68B)-H(68G) | 120.0     |
| C(50B)-C(48B)-C(47B) | 113(3)    | C(70B)-C(69B)-C(68B) | 120.0     |
| C(49B)-C(48B)-H(48G) | 106.3     | C(70B)-C(69B)-H(69G) | 120.0     |
| C(50B)-C(48B)-H(48G) | 106.3     | C(68B)-C(69B)-H(69G) | 120.0     |
| C(47B)-C(48B)-H(48G) | 106.3     | C(71B)-C(70B)-C(69B) | 120.0     |
| C(48B)-C(49B)-H(49G) | 109.5     | C(71B)-C(70B)-H(70G) | 120.0     |
| C(48B)-C(49B)-H(49H) | 109.5     | C(69B)-C(70B)-H(70G) | 120.0     |
| H(49G)-C(49B)-H(49H) | 109.5     | C(70B)-C(71B)-C(66B) | 120.0     |
| C(48B)-C(49B)-H(49I) | 109.5     | C(70B)-C(71B)-H(71G) | 120.0     |
| H(49G)-C(49B)-H(49I) | 109.5     | C(66B)-C(71B)-H(71G) | 120.0     |
| H(49H)-C(49B)-H(49I) | 109.5     | C(73B)-C(72B)-C(77B) | 120.0     |
| C(48B)-C(50B)-C(59)  | 115(4)    | C(73B)-C(72B)-Si(61) | 116.8(14) |
| C(48B)-C(50B)-O(51B) | 128(4)    | C(77B)-C(72B)-Si(61) | 123.0(14) |



|                      |       |
|----------------------|-------|
| C(74B)-C(73B)-C(72B) | 120.0 |
| C(74B)-C(73B)-H(73G) | 120.0 |
| C(72B)-C(73B)-H(73G) | 120.0 |
| C(73B)-C(74B)-C(75B) | 120.0 |
| C(73B)-C(74B)-H(74G) | 120.0 |
| C(75B)-C(74B)-H(74G) | 120.0 |
| C(76B)-C(75B)-C(74B) | 120.0 |
| C(76B)-C(75B)-H(75G) | 120.0 |
| C(74B)-C(75B)-H(75G) | 120.0 |
| C(75B)-C(76B)-C(77B) | 120.0 |
| C(75B)-C(76B)-H(76G) | 120.0 |
| C(77B)-C(76B)-H(76G) | 120.0 |
| C(76B)-C(77B)-C(72B) | 120.0 |
| C(76B)-C(77B)-H(77G) | 120.0 |
| C(72B)-C(77B)-H(77G) | 120.0 |

---

Symmetry transformations used to generate  
equivalent atoms:

**Table S16.** Anisotropic displacement parameters (  $\text{\AA}^2 \times 10^3$  ) for spiro- $\delta$ -lactam **21**. The anisotropic displacement factor exponent takes the form:  $-2\pi^2[h^2a^{*2}U^{11} + \dots + 2hk a^* b^* U^{12}]$ .

|        | U <sup>11</sup> | U <sup>22</sup> | U <sup>33</sup> | U <sup>23</sup> | U <sup>13</sup> | U <sup>12</sup> |
|--------|-----------------|-----------------|-----------------|-----------------|-----------------|-----------------|
| O(1)   | 35(4)           | 58(6)           | 32(4)           | 6(4)            | 17(3)           | 15(4)           |
| C(2)   | 32(5)           | 30(6)           | 13(4)           | 9(4)            | 7(4)            | 1(5)            |
| N(3)   | 22(4)           | 46(6)           | 23(4)           | 5(4)            | 5(3)            | 8(4)            |
| C(4)   | 35(5)           | 50(7)           | 26(5)           | 7(5)            | 6(4)            | -6(6)           |
| C(5)   | 25(5)           | 36(6)           | 40(5)           | 16(5)           | 14(4)           | 5(5)            |
| C(6)   | 34(5)           | 32(6)           | 31(5)           | 2(4)            | 15(4)           | 10(5)           |
| C(7)   | 18(4)           | 24(5)           | 15(4)           | -4(4)           | 0(3)            | 1(4)            |
| C(8)   | 23(5)           | 30(6)           | 22(5)           | 2(4)            | 5(4)            | -6(4)           |
| C(9)   | 41(7)           | 42(8)           | 47(7)           | 3(6)            | -5(6)           | -4(6)           |
| C(16)  | 33(5)           | 34(6)           | 32(5)           | 6(5)            | 20(4)           | 6(5)            |
| C(17)  | 13(4)           | 34(6)           | 20(4)           | 4(4)            | 2(4)            | -2(4)           |
| C(18)  | 15(4)           | 27(5)           | 21(4)           | 0(4)            | 3(3)            | 2(4)            |
| C(19)  | 18(5)           | 38(7)           | 30(5)           | 6(5)            | 2(4)            | -3(5)           |
| O(20)  | 23(4)           | 31(4)           | 28(4)           | 8(3)            | 4(3)            | 2(3)            |
| Si(21) | 11(1)           | 30(2)           | 23(1)           | 0(1)            | -1(1)           | 1(1)            |
| C(22)  | 31(5)           | 27(6)           | 31(5)           | 0(4)            | 19(4)           | -2(5)           |
| C(23)  | 45(7)           | 42(8)           | 65(9)           | -10(7)          | 29(7)           | -6(6)           |
| C(24)  | 52(8)           | 57(9)           | 67(9)           | -6(7)           | 45(7)           | -9(7)           |
| C(25)  | 38(7)           | 79(11)          | 67(9)           | 32(8)           | 31(7)           | -1(7)           |
| C(56)  | 13(4)           | 38(6)           | 34(5)           | 2(4)            | 15(4)           | 8(4)            |
| C(57)  | 19(4)           | 31(6)           | 16(4)           | -7(4)           | 7(3)            | 3(4)            |
| C(58)  | 18(4)           | 23(5)           | 24(4)           | -1(4)           | 9(4)            | -11(4)          |
| C(59)  | 27(5)           | 38(6)           | 36(6)           | 9(5)            | 10(4)           | 3(5)            |
| O(60)  | 37(4)           | 31(4)           | 23(3)           | -3(3)           | 4(3)            | -12(4)          |
| Si(61) | 24(2)           | 28(2)           | 28(1)           | -4(1)           | 3(1)            | -7(1)           |
| C(62)  | 41(6)           | 46(7)           | 36(6)           | -29(5)          | 13(5)           | -13(6)          |
| C(63)  | 54(9)           | 62(10)          | 65(9)           | -24(8)          | 22(7)           | -22(8)          |
| C(64)  | 60(9)           | 63(10)          | 40(7)           | -16(7)          | 11(6)           | -22(8)          |
| C(65)  | 54(8)           | 57(9)           | 56(8)           | -18(8)          | 19(7)           | -5(8)           |
| C(10)  | 19(6)           | 22(7)           | 18(6)           | 2(5)            | 12(4)           | 0(5)            |
| O(11)  | 24(5)           | 26(6)           | 19(4)           | -6(4)           | 8(4)            | 10(4)           |
| O(12)  | 88(10)          | 65(11)          | 34(8)           | -22(8)          | 17(7)           | 1(9)            |
| C(13)  | 46(6)           | 42(7)           | 36(6)           | -6(6)           | 15(5)           | 1(6)            |

|       |        |        |        |         |        |        |
|-------|--------|--------|--------|---------|--------|--------|
| C(14) | 46(7)  | 51(8)  | 44(6)  | -5(6)   | 27(5)  | -2(6)  |
| C(15) | 35(7)  | 34(8)  | 36(6)  | 0(6)    | 17(5)  | 1(6)   |
| C(26) | 20(5)  | 25(7)  | 29(6)  | -6(5)   | 11(4)  | 3(5)   |
| C(27) | 28(6)  | 29(7)  | 31(6)  | -3(5)   | 12(4)  | 0(5)   |
| C(28) | 38(6)  | 40(7)  | 43(6)  | -2(5)   | 19(5)  | -1(5)  |
| C(29) | 38(6)  | 42(7)  | 48(6)  | -5(5)   | 24(5)  | 5(5)   |
| C(30) | 29(6)  | 40(7)  | 39(6)  | -2(6)   | 16(5)  | 0(5)   |
| C(31) | 23(5)  | 19(6)  | 25(5)  | 1(5)    | 6(4)   | 3(5)   |
| C(32) | 27(6)  | 22(6)  | 23(5)  | -2(5)   | 4(4)   | -5(5)  |
| C(33) | 42(6)  | 42(7)  | 39(6)  | 1(5)    | 18(5)  | 3(5)   |
| C(34) | 40(6)  | 37(6)  | 34(6)  | -1(5)   | 15(5)  | 4(5)   |
| C(35) | 37(6)  | 36(6)  | 32(6)  | 1(5)    | 9(5)   | 0(5)   |
| C(36) | 32(6)  | 42(7)  | 45(7)  | 8(5)    | 15(5)  | 5(5)   |
| C(37) | 28(6)  | 33(7)  | 39(6)  | 5(5)    | 12(5)  | 2(5)   |
| O(41) | 51(10) | 37(12) | 33(8)  | 2(8)    | 26(7)  | 14(8)  |
| C(42) | 29(7)  | 29(7)  | 26(6)  | 1(5)    | 10(5)  | -2(5)  |
| N(43) | 27(6)  | 32(7)  | 30(6)  | 0(5)    | 10(5)  | -1(5)  |
| C(44) | 35(6)  | 36(7)  | 30(6)  | 3(5)    | 9(5)   | 1(6)   |
| C(45) | 32(6)  | 39(7)  | 35(6)  | 2(6)    | 13(5)  | -1(6)  |
| C(46) | 29(6)  | 30(7)  | 29(6)  | 2(6)    | 8(5)   | -4(6)  |
| C(47) | 24(6)  | 27(7)  | 27(6)  | -3(5)   | 10(5)  | -1(5)  |
| C(48) | 27(7)  | 29(7)  | 29(6)  | -1(5)   | 11(5)  | 1(5)   |
| C(49) | 58(12) | 62(13) | 65(12) | -11(10) | 22(10) | 7(10)  |
| C(50) | 29(7)  | 28(7)  | 30(7)  | -2(6)   | 16(5)  | 2(5)   |
| O(51) | 37(6)  | 39(6)  | 36(7)  | -3(5)   | 15(5)  | -3(5)  |
| O(52) | 48(9)  | 49(10) | 57(10) | 16(8)   | 20(8)  | -17(8) |
| C(53) | 34(7)  | 37(7)  | 34(7)  | 3(6)    | 16(5)  | -4(5)  |
| C(54) | 34(7)  | 38(7)  | 34(7)  | 3(5)    | 20(5)  | -8(6)  |
| C(55) | 32(7)  | 34(8)  | 35(7)  | 1(6)    | 13(5)  | -1(6)  |
| C(66) | 20(6)  | 22(7)  | 26(6)  | -5(5)   | 9(5)   | 1(5)   |
| C(67) | 33(7)  | 36(7)  | 36(7)  | -1(6)   | 12(5)  | -3(6)  |
| C(68) | 38(7)  | 35(7)  | 33(7)  | -3(6)   | 13(5)  | 1(6)   |
| C(69) | 37(7)  | 41(7)  | 39(7)  | 0(6)    | 15(5)  | 0(6)   |
| C(70) | 33(7)  | 37(7)  | 41(7)  | 6(6)    | 20(5)  | -2(6)  |
| C(71) | 33(7)  | 36(7)  | 34(6)  | 1(5)    | 16(5)  | 5(5)   |
| C(72) | 32(7)  | 30(7)  | 27(6)  | 4(5)    | 15(5)  | -4(5)  |
| C(73) | 36(7)  | 39(7)  | 37(7)  | 3(5)    | 16(5)  | 3(6)   |
| C(74) | 46(7)  | 44(7)  | 37(7)  | 3(6)    | 18(5)  | 3(6)   |

|        |        |        |        |        |        |        |
|--------|--------|--------|--------|--------|--------|--------|
| C(75)  | 45(7)  | 47(7)  | 44(7)  | 3(6)   | 18(5)  | 0(6)   |
| C(76)  | 48(7)  | 50(7)  | 50(7)  | 3(6)   | 17(5)  | 2(6)   |
| C(77)  | 43(7)  | 40(7)  | 40(7)  | 3(6)   | 16(5)  | -5(6)  |
| C(10B) | 25(8)  | 24(8)  | 25(8)  | -4(6)  | 10(6)  | 1(6)   |
| O(11B) | 32(8)  | 31(8)  | 23(7)  | -1(6)  | 12(5)  | 2(6)   |
| O(12B) | 49(12) | 49(14) | 25(10) | -4(10) | 21(8)  | 5(10)  |
| C(13B) | 33(7)  | 32(8)  | 26(7)  | 0(6)   | 15(5)  | -1(6)  |
| C(14B) | 41(8)  | 38(8)  | 36(8)  | -3(6)  | 22(6)  | 1(6)   |
| C(15B) | 33(8)  | 34(9)  | 33(8)  | -1(6)  | 15(6)  | 0(6)   |
| C(26B) | 25(8)  | 26(8)  | 30(8)  | -2(6)  | 10(5)  | 1(6)   |
| C(27B) | 32(8)  | 34(8)  | 34(8)  | -3(6)  | 12(5)  | 0(6)   |
| C(28B) | 35(8)  | 34(8)  | 37(8)  | -1(6)  | 15(5)  | -1(6)  |
| C(29B) | 37(8)  | 41(8)  | 46(8)  | -1(6)  | 20(6)  | 1(6)   |
| C(30B) | 33(8)  | 32(8)  | 34(7)  | 0(6)   | 15(5)  | -2(6)  |
| C(31B) | 30(8)  | 33(8)  | 35(8)  | 3(6)   | 13(5)  | 3(6)   |
| C(32B) | 32(8)  | 32(8)  | 27(8)  | 2(6)   | 12(5)  | -2(6)  |
| C(33B) | 34(8)  | 36(8)  | 34(8)  | 0(6)   | 17(5)  | 2(6)   |
| C(34B) | 40(8)  | 43(8)  | 40(8)  | 0(6)   | 16(6)  | 1(6)   |
| C(35B) | 31(8)  | 34(8)  | 32(8)  | -2(6)  | 13(5)  | 2(6)   |
| C(36B) | 32(8)  | 36(8)  | 38(8)  | 6(6)   | 16(5)  | 1(6)   |
| C(37B) | 34(8)  | 39(8)  | 41(8)  | 1(6)   | 15(6)  | 1(6)   |
| O(41B) | 42(11) | 44(14) | 36(11) | 4(10)  | 22(8)  | 17(9)  |
| C(42B) | 26(7)  | 28(8)  | 25(7)  | -2(6)  | 13(5)  | 1(6)   |
| N(43B) | 33(7)  | 27(7)  | 29(6)  | 1(6)   | 13(5)  | 0(6)   |
| C(44B) | 36(7)  | 35(7)  | 36(7)  | 2(6)   | 13(5)  | -1(6)  |
| C(45B) | 24(7)  | 29(7)  | 29(7)  | -1(6)  | 10(5)  | 1(6)   |
| C(46B) | 28(7)  | 27(7)  | 33(7)  | -5(6)  | 9(5)   | 2(6)   |
| C(47B) | 23(6)  | 23(7)  | 26(6)  | -3(5)  | 14(5)  | 0(5)   |
| C(48B) | 39(8)  | 36(7)  | 36(7)  | -6(6)  | 15(5)  | 1(6)   |
| C(49B) | 81(15) | 70(15) | 72(15) | -1(12) | 21(11) | -7(12) |
| C(50B) | 24(7)  | 25(7)  | 27(8)  | -2(6)  | 14(5)  | 3(5)   |
| O(51B) | 35(7)  | 38(7)  | 38(7)  | 4(6)   | 19(5)  | -1(5)  |
| O(52B) | 71(13) | 68(14) | 75(13) | 10(11) | 40(10) | -8(10) |
| C(53B) | 38(7)  | 42(8)  | 38(7)  | 2(6)   | 24(5)  | -4(6)  |
| C(54B) | 39(8)  | 40(8)  | 38(8)  | 2(6)   | 21(6)  | -4(6)  |
| C(55B) | 28(7)  | 33(8)  | 34(8)  | -4(6)  | 16(5)  | 1(6)   |
| C(66B) | 22(7)  | 25(7)  | 29(7)  | 0(6)   | 10(5)  | 1(6)   |
| C(67B) | 38(7)  | 39(8)  | 37(7)  | 0(6)   | 16(5)  | 3(6)   |

|        |       |       |       |       |       |       |
|--------|-------|-------|-------|-------|-------|-------|
| C(68B) | 38(8) | 42(8) | 43(7) | 1(6)  | 23(5) | -3(6) |
| C(69B) | 38(7) | 41(8) | 42(7) | 1(6)  | 14(5) | 1(6)  |
| C(70B) | 41(7) | 36(8) | 39(7) | 1(6)  | 13(5) | -3(6) |
| C(71B) | 27(7) | 28(7) | 32(7) | 0(6)  | 8(5)  | -4(6) |
| C(72B) | 38(8) | 38(8) | 41(8) | 3(6)  | 15(5) | -2(6) |
| C(73B) | 45(7) | 41(8) | 39(7) | 1(6)  | 15(5) | 1(6)  |
| C(74B) | 44(8) | 45(8) | 39(7) | 2(6)  | 18(5) | 1(6)  |
| C(75B) | 40(7) | 43(7) | 40(7) | 2(6)  | 19(5) | 3(6)  |
| C(76B) | 40(7) | 46(8) | 44(7) | 1(6)  | 18(5) | 4(6)  |
| C(77B) | 42(7) | 45(8) | 37(7) | -4(6) | 22(5) | 1(6)  |

---

**Table S17.** Hydrogen coordinates (  $\times 10^4$  ) and isotropic displacement parameters (  $\text{\AA}^2 \times 10^3$  ) for spiro- $\delta$ -lactam **21**.

|        | x        | y         | z       | U(eq) |
|--------|----------|-----------|---------|-------|
| H(3)   | 7177     | 6035      | 2622    | 39    |
| H(4A)  | 5700     | 6441      | 2329    | 48    |
| H(4B)  | 6256     | 7642      | 2646    | 48    |
| H(5A)  | 5498     | 7542      | 3492    | 40    |
| H(5B)  | 5636     | 6154      | 3619    | 40    |
| H(6A)  | 6629     | 7186      | 4909    | 38    |
| H(6B)  | 7108     | 7812      | 4376    | 38    |
| H(8)   | 8914     | 6053      | 5308    | 32    |
| H(9A)  | 9169     | 7550      | 6331    | 79    |
| H(9B)  | 8084     | 7776      | 5933    | 79    |
| H(9C)  | 8621     | 8026      | 5357    | 79    |
| H(16A) | 6281     | 5703      | 5347    | 37    |
| H(16B) | 6446     | 4334      | 5578    | 37    |
| H(17)  | 6472     | 4697      | 4200    | 30    |
| H(18)  | 7893     | 3735      | 4526    | 28    |
| H(19A) | 8615     | 3554      | 6299    | 38    |
| H(19B) | 9105     | 4150      | 5763    | 38    |
| H(23A) | 5546     | -713      | 4708    | 73    |
| H(23B) | 5725     | -219      | 3921    | 73    |
| H(23C) | 4928     | 333       | 4120    | 73    |
| H(24A) | 5527     | 994       | 5767    | 77    |
| H(24B) | 5226     | 1992      | 5039    | 77    |
| H(24C) | 6191     | 2085      | 5887    | 77    |
| H(25A) | 6810     | -261      | 6027    | 88    |
| H(25B) | 7492     | 763       | 6045    | 88    |
| H(25C) | 7293     | -313      | 5389    | 88    |
| H(56A) | 8899     | 5932      | -499    | 32    |
| H(56B) | 9817     | 6288      | 356     | 32    |
| H(57)  | 8900(80) | 5260(110) | 840(80) | 33    |
| H(58)  | 7240(80) | 5880(110) | 350(80) | 33    |
| H(59A) | 7166     | 7185      | -1070   | 42    |
| H(59B) | 6828     | 7677      | -382    | 42    |

|        |       |       |       |    |
|--------|-------|-------|-------|----|
| H(63A) | 7832  | 2770  | -1947 | 92 |
| H(63B) | 8299  | 2696  | -908  | 92 |
| H(63C) | 8076  | 3942  | -1380 | 92 |
| H(64A) | 6270  | 3426  | -2795 | 88 |
| H(64B) | 6391  | 4601  | -2248 | 88 |
| H(64C) | 5595  | 3693  | -2359 | 88 |
| H(65A) | 6511  | 1517  | -2018 | 86 |
| H(65B) | 5962  | 1899  | -1477 | 86 |
| H(65C) | 7000  | 1441  | -979  | 86 |
| H(14)  | 7359  | 5602  | 7346  | 53 |
| H(27)  | 6491  | 180   | 2968  | 36 |
| H(28)  | 7484  | -1032 | 2673  | 48 |
| H(29)  | 9068  | -986  | 3577  | 49 |
| H(30)  | 9659  | 272   | 4776  | 43 |
| H(31)  | 8665  | 1485  | 5071  | 29 |
| H(33)  | 6523  | 2524  | 2677  | 49 |
| H(34)  | 5517  | 3601  | 1471  | 45 |
| H(35)  | 4178  | 4406  | 1451  | 44 |
| H(36)  | 3846  | 4135  | 2638  | 49 |
| H(37)  | 4852  | 3058  | 3844  | 41 |
| H(43)  | 8849  | 5870  | 3009  | 37 |
| H(44A) | 10229 | 5131  | 3195  | 42 |
| H(44B) | 10423 | 6447  | 3554  | 42 |
| H(45A) | 11078 | 6404  | 2605  | 43 |
| H(45B) | 10260 | 5629  | 1909  | 43 |
| H(46A) | 10189 | 7628  | 1460  | 37 |
| H(46B) | 10023 | 8010  | 2281  | 37 |
| H(48)  | 7738  | 8257  | 906   | 35 |
| H(49A) | 8410  | 10078 | 1022  | 95 |
| H(49B) | 9388  | 9503  | 1236  | 95 |
| H(49C) | 8966  | 9403  | 1922  | 95 |
| H(54)  | 9718  | 8502  | -692  | 40 |
| H(67)  | 5624  | 6073  | -920  | 44 |
| H(68)  | 4132  | 6427  | -1082 | 44 |
| H(69)  | 3272  | 4905  | -893  | 47 |
| H(70)  | 3903  | 3028  | -541  | 43 |
| H(71)  | 5395  | 2674  | -379  | 41 |
| H(73)  | 6854  | 4242  | 1121  | 45 |

|        |       |      |       |     |
|--------|-------|------|-------|-----|
| H(74)  | 7771  | 3675 | 2560  | 51  |
| H(75)  | 9060  | 2488 | 2890  | 55  |
| H(76)  | 9432  | 1868 | 1782  | 61  |
| H(77)  | 8515  | 2434 | 342   | 50  |
| H(14G) | 7532  | 6533 | 7288  | 44  |
| H(27G) | 6560  | 306  | 2990  | 41  |
| H(28G) | 7642  | -770 | 2728  | 43  |
| H(29G) | 9214  | -556 | 3644  | 49  |
| H(30G) | 9703  | 735  | 4823  | 39  |
| H(31G) | 8621  | 1811 | 5086  | 40  |
| H(33G) | 6401  | 2612 | 2690  | 41  |
| H(34G) | 5337  | 3809 | 1605  | 49  |
| H(35G) | 3982  | 4376 | 1676  | 39  |
| H(36G) | 3691  | 3747 | 2832  | 42  |
| H(37G) | 4755  | 2550 | 3917  | 47  |
| H(43G) | 8852  | 5464 | 2977  | 36  |
| H(44G) | 10103 | 4532 | 3056  | 44  |
| H(44H) | 10461 | 5773 | 3510  | 44  |
| H(45G) | 11107 | 5664 | 2571  | 34  |
| H(45H) | 10206 | 5075 | 1819  | 34  |
| H(46G) | 10328 | 7102 | 1521  | 37  |
| H(46H) | 10267 | 7442 | 2401  | 37  |
| H(48G) | 8108  | 8281 | 1178  | 45  |
| H(49G) | 9018  | 9817 | 993   | 118 |
| H(49H) | 9869  | 8929 | 1339  | 118 |
| H(49I) | 9410  | 9308 | 1960  | 118 |
| H(54G) | 9507  | 8149 | -972  | 45  |
| H(67G) | 5580  | 2488 | -300  | 45  |
| H(68G) | 4071  | 2724 | -477  | 47  |
| H(69G) | 3321  | 4519 | -944  | 50  |
| H(70G) | 4080  | 6078 | -1235 | 49  |
| H(71G) | 5589  | 5843 | -1058 | 37  |
| H(73G) | 6771  | 4409 | 1123  | 51  |
| H(74G) | 7535  | 3869 | 2589  | 52  |
| H(75G) | 8732  | 2502 | 3039  | 48  |
| H(76G) | 9165  | 1675 | 2025  | 52  |
| H(77G) | 8401  | 2215 | 560   | 48  |



**Table S18.** Hydrogen bonds for spiro- $\delta$ -lactam **21** [ $\text{\AA}$  and  $^\circ$ ].

| D-H...A              | d(D-H) | d(H...A) | d(D...A) | $\angle(\text{DHA})$ |
|----------------------|--------|----------|----------|----------------------|
| N(3)-H(3)...O(41)    | 0.88   | 2.15     | 2.85(3)  | 135.9                |
| N(3)-H(3)...O(41B)   | 0.88   | 2.09     | 2.85(4)  | 144.7                |
| N(43)-H(43)...O(1)   | 0.88   | 2.05     | 2.91(2)  | 168.4                |
| N(43B)-H(43G)...O(1) | 0.88   | 2.04     | 2.87(3)  | 155.6                |

Symmetry transformations used to generate equivalent atoms:

### 10. Absorption and ECD Spectra of hemiaminal ether **25**

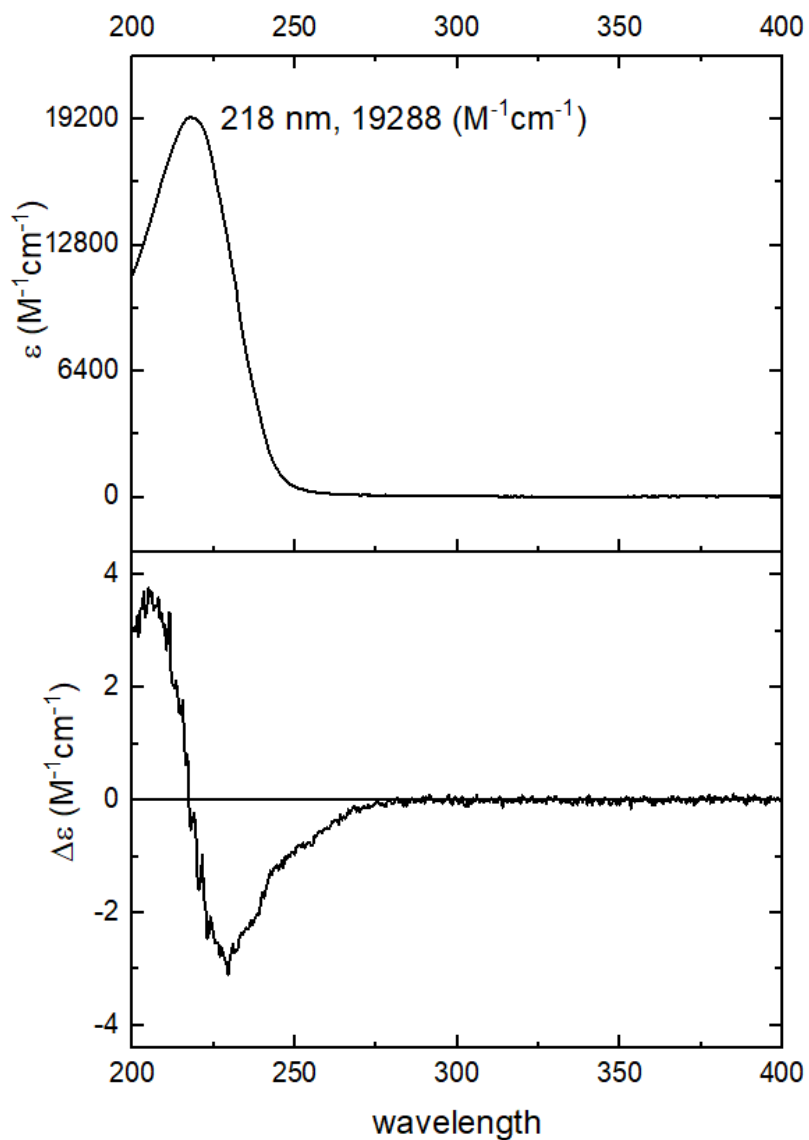

**Figure S41.** UV/Vis and ECD spectra of hemiaminal ether **25** in acetonitrile

UV  $\lambda_{max}$  ( $\log \epsilon$ , MeCN) 218 (4.28) ( $\lambda_{max}$ : nm,  $\epsilon$ :  $M^{-1}cm^{-1}$ )

ECD  $\lambda_{max}$  ( $\Delta\epsilon$ , MeCN) 206 (+3.69) 229.5 (-2.90) ( $\lambda_{max}$ : nm,  $\Delta\epsilon$ :  $M^{-1}cm^{-1}$ )

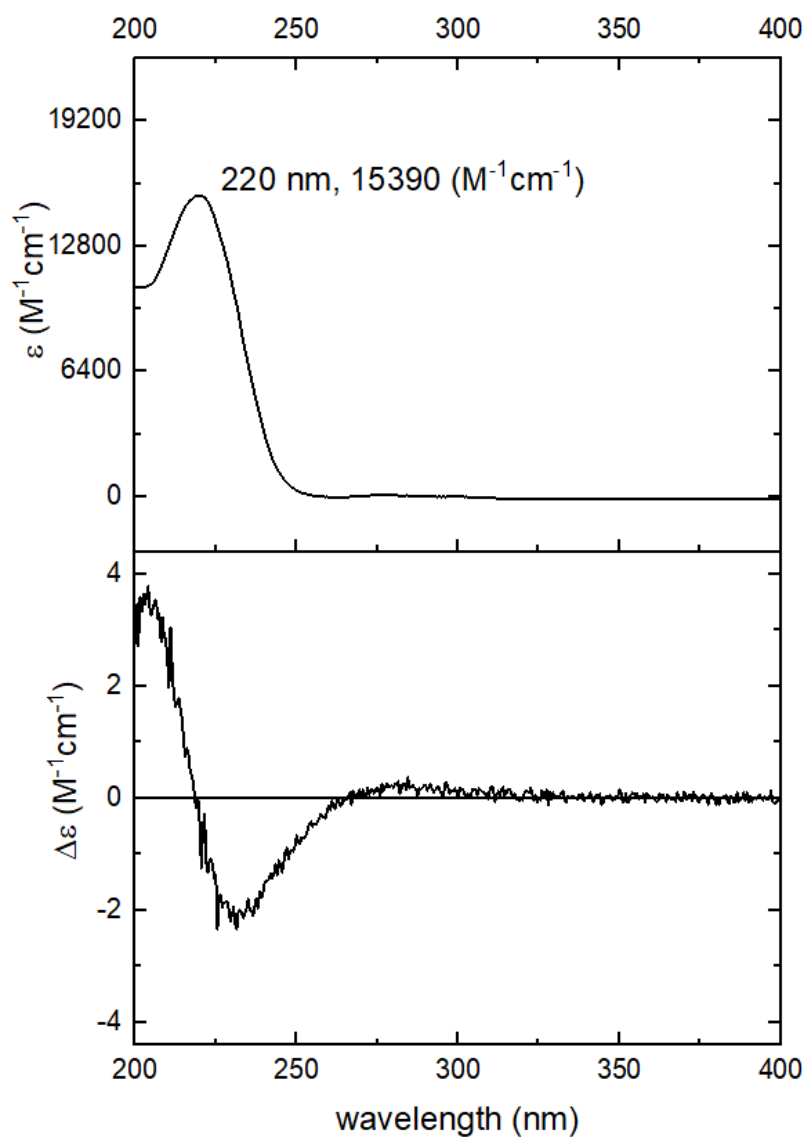

**Figure S42.** UV/Vis and ECD spectra of hemiaminal ether **25** in methanol

UV  $\lambda_{max}$  (log  $\epsilon$ , MeOH) 220 (4.19) ( $\lambda_{max}$ : nm,  $\epsilon$ :  $M^{-1}cm^{-1}$ )

ECD  $\lambda_{max}$  ( $\Delta\epsilon$ , MeCN) 206 (+3.69) 229 (-2.90) ( $\lambda_{max}$ : nm,  $\Delta\epsilon$ :  $M^{-1}cm^{-1}$ )

## 11. Computational Studies of hemiaminal ether **25**

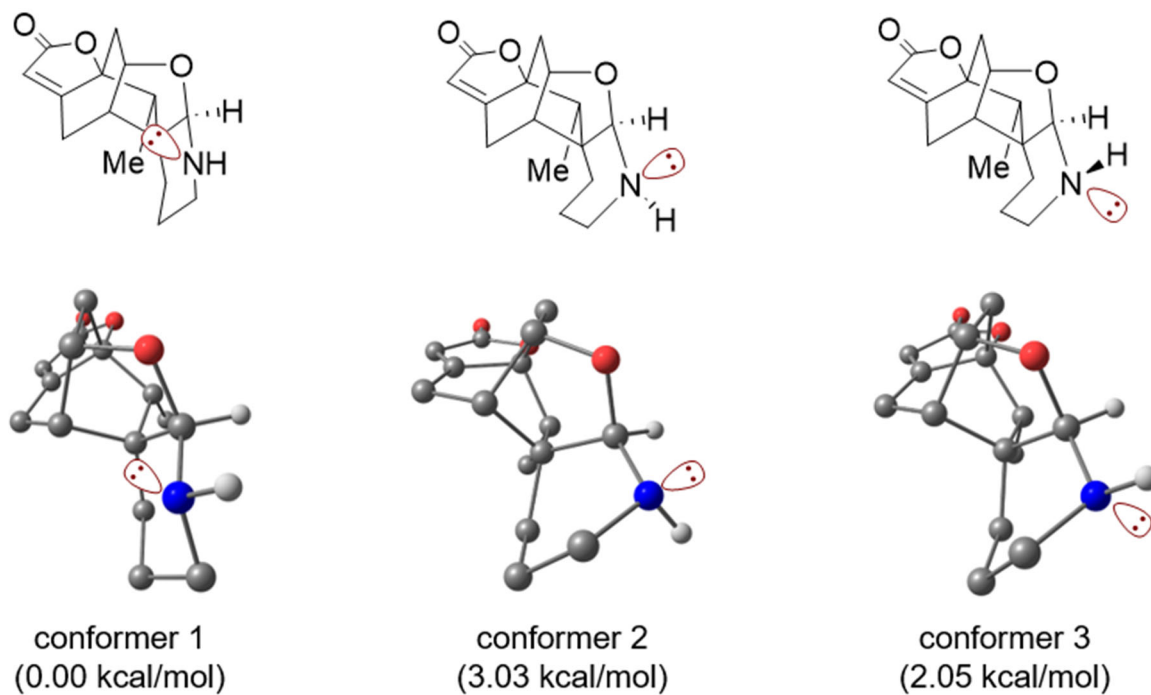

**Figure S43.** Conformers of hemiaminal ether **25** with relative free energies.

*Note:*

*Unlike securinine or allosecurinine, there was no significant difference in absorption or ECD by changing the conformation. (vide infra)*

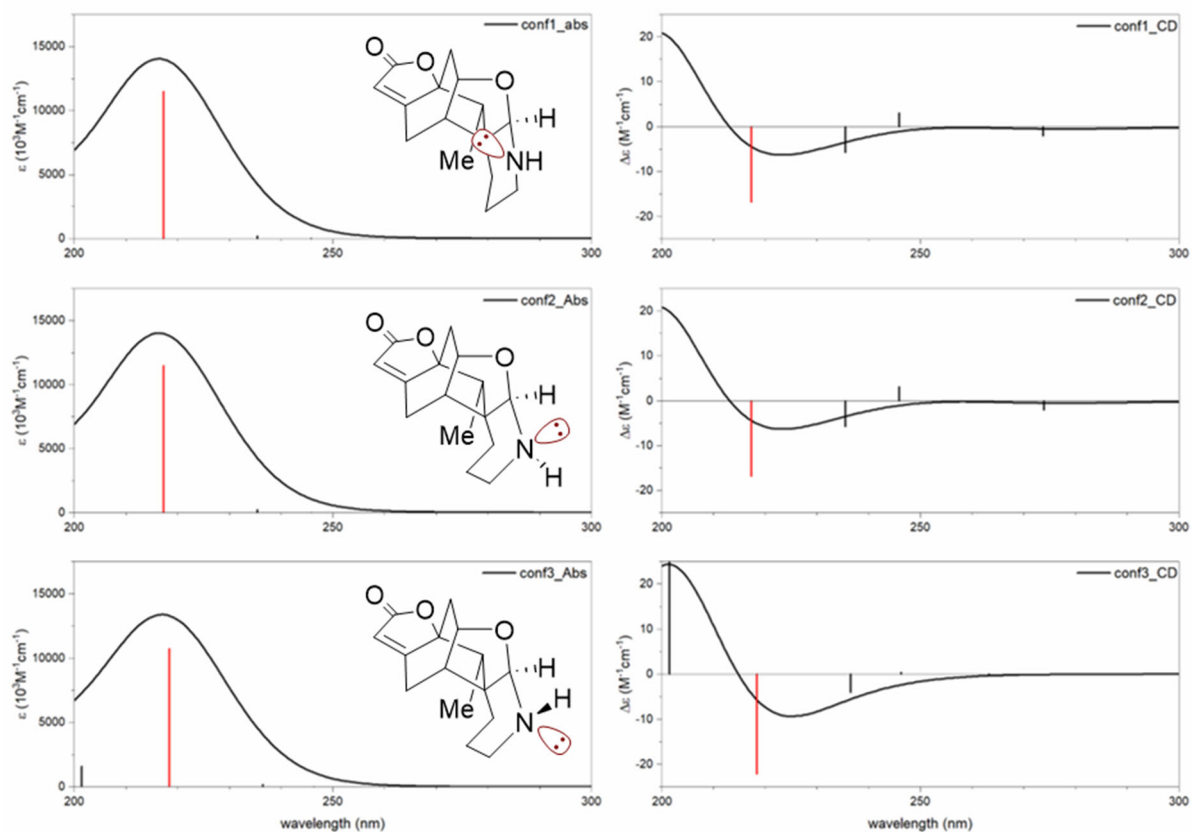

**Figure S44.** Computed absorption and ECD spectra of all conformers of hemiaminal ether **25**.

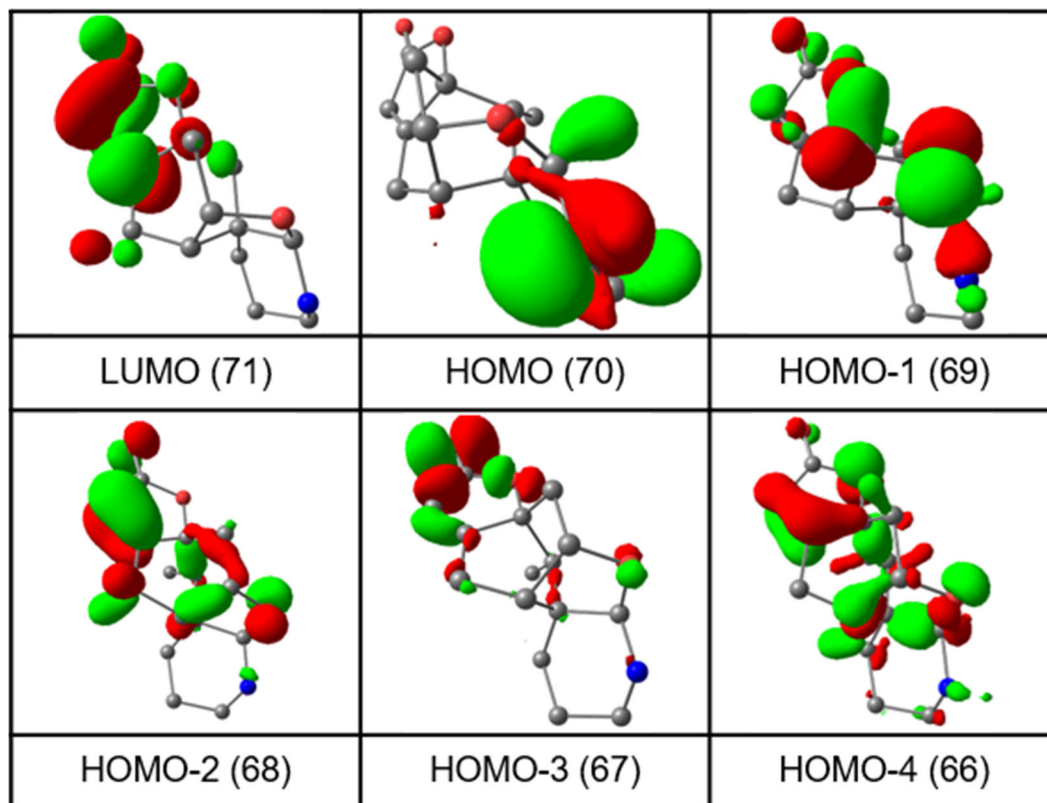

**Figure S45.** Molecular orbitals of conformer 1, hemiaminal ether **25** (contour value = 0.05).

| Wavelength (nm) | Oscillator Strength | Rotatory Strength | Contributions                       | Assignments & notes                                         |
|-----------------|---------------------|-------------------|-------------------------------------|-------------------------------------------------------------|
| 273.75          | 0.0008              | -2.4476           | 99.2% H → L                         | Nitrogen lone pair → $\pi^*$                                |
| 245.86          | 0.0004              | 3.6037            | 82.6% H-3 → L, 13.5% H-1 → L        |                                                             |
| 235.48          | 0.0063              | -6.8439           | 85.1% H-1 → L, 13.4% H-3 → L        | Hemiaminal oxygen lone pair → $\pi^*$                       |
| <b>217.3</b>    | <b>0.3286</b>       | <b>-20.143</b>    | <b>89.4% H-2 → L, 6.94% H-4 → L</b> | <b><math>\pi \rightarrow \pi^*</math>, major absorption</b> |

**Table S19.** Excitation energies (wavelength), oscillator strength, rotatory strength (velocity) and orbital contributions of each excited state of conformer 1, hemiaminal ether **25**. Excited states over 200 nm were only included. H: HOMO, L: LUMO.

## 12. Computational Studies of Possible Suffruticosine Candidates (26–33)

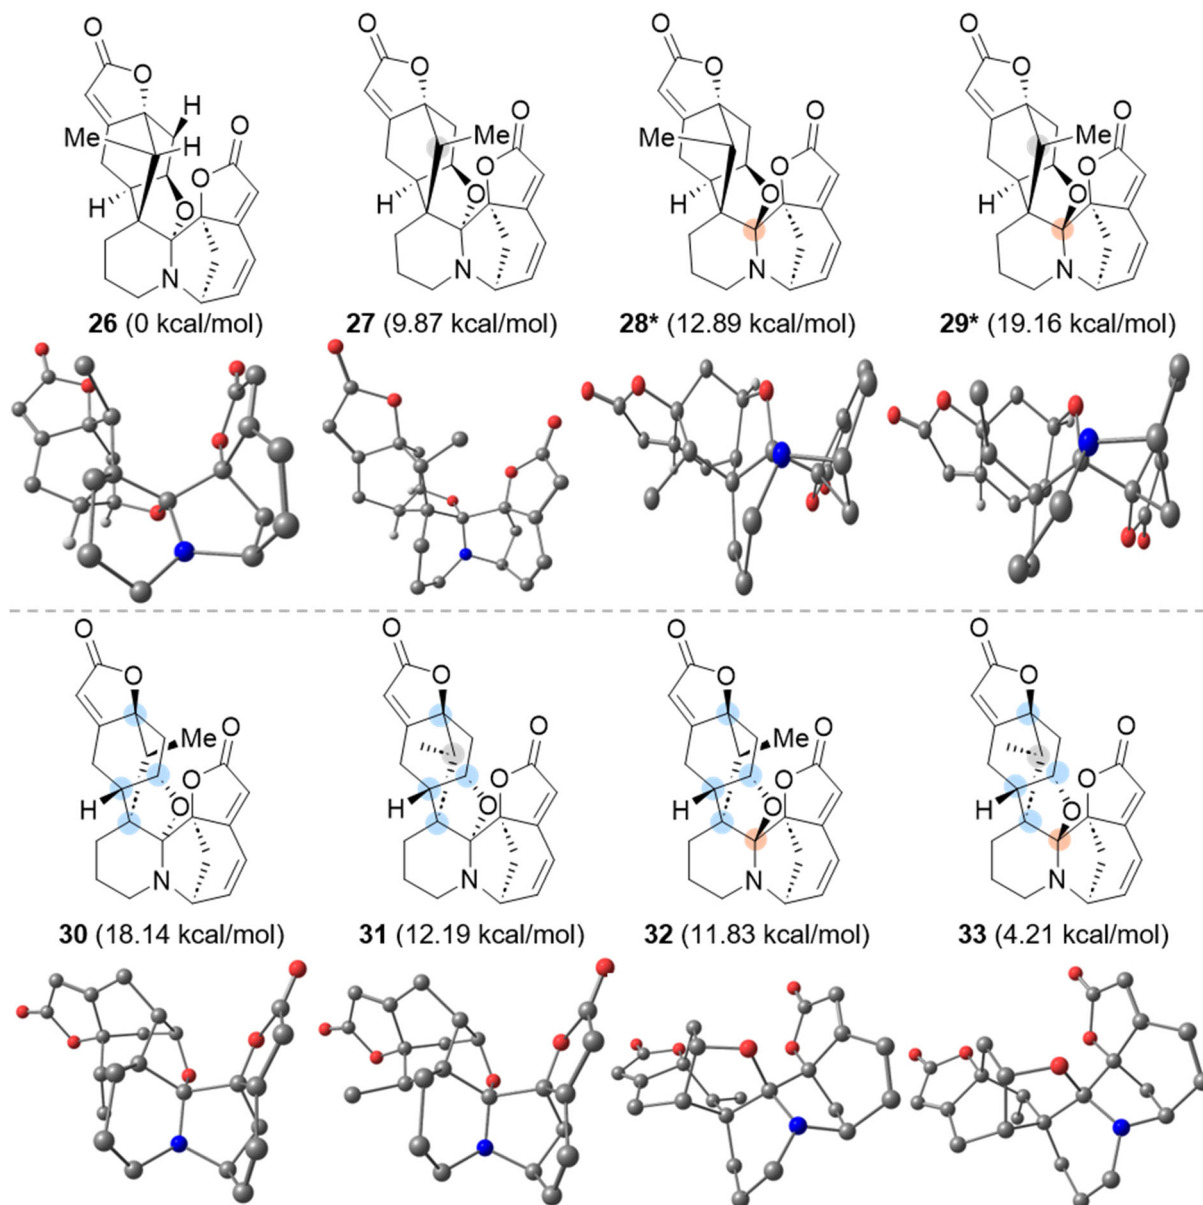

**Figure S46.** Possible candidates of suffruticosine (**26–33**) and their ground state conformations with relative free energies. (\*: see below *Note*)

*Note: Attempts to search the geometry of structure **28** and **29** having a negative ECD intensity around 400 nm*

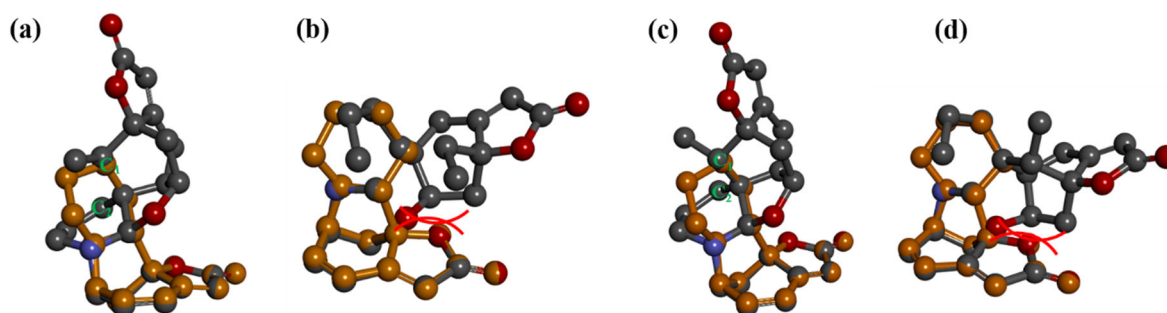

Figure (a) represents an overlay of optimized geometry structures of a securinine, conformer 2a (orange) and **28** (black, red, and blue) with zero ECD signal near 400 nm (i.e., nitrogen lone pair to  $\pi^*$  transition). To reproduce the ECD intensity from 400 nm, the geometry of suffruticosine has to be changed into the geometry of the conformer 2a (or either 2b). It means that the carbon, C<sub>2</sub> from **28** needs to be shifted to the position of carbon, C<sub>1</sub> from securinine. Figure (b) represents an overlay of an optimized geometry structure of a securinine, conformer 2a (orange) and modified geometry of **28** (black, red, and blue) to overlap the two carbons, C<sub>1</sub> and C<sub>2</sub> from figure (a). From figure (b), two conjugated systems from the modified **28** are crashed in geometric manner. This result states that there is no possible geometry for **28** with non-zero ECD signal.

Figure (c) represents an overlay of optimized geometry structures of a securinine, conformer 2a (orange) and **29** (black, red, and blue) with zero ECD signal near 400 nm. While figure (d) shows an overlay of an optimized geometry structure of a securinine, conformer 2a (orange) of **29** (black, red, and blue) to overlap the two carbons, C<sub>1</sub> and C<sub>2</sub> from figure (c). As a similar fashion that described above, there is no plausible geometry that reproduces **29** with non-zero ECD signal.



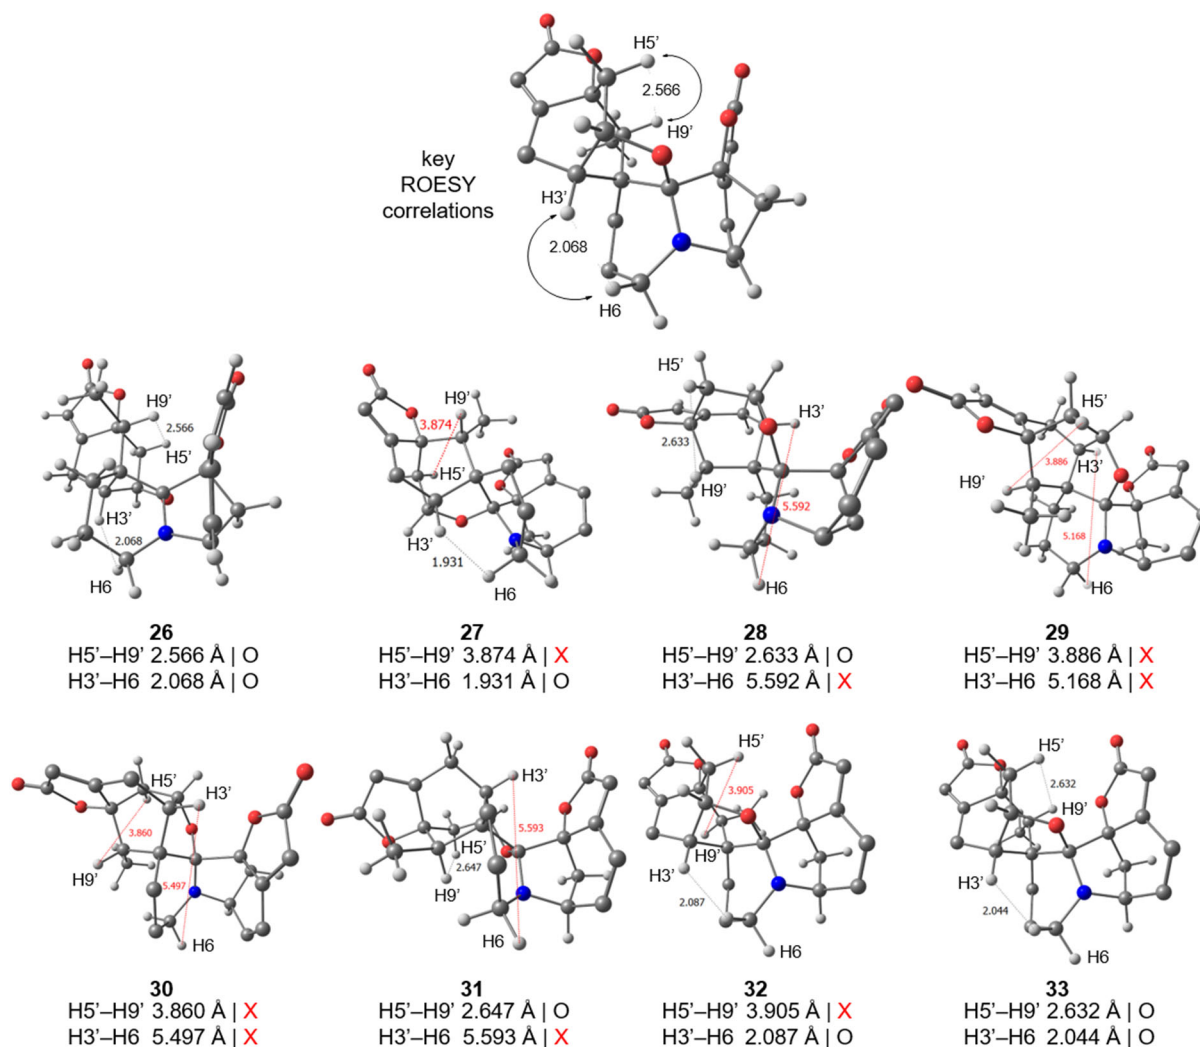

**Figure S47.** Examinations of the key ROESY correlations<sup>12</sup> to all possible stereoisomeric candidates of suffruticosine.

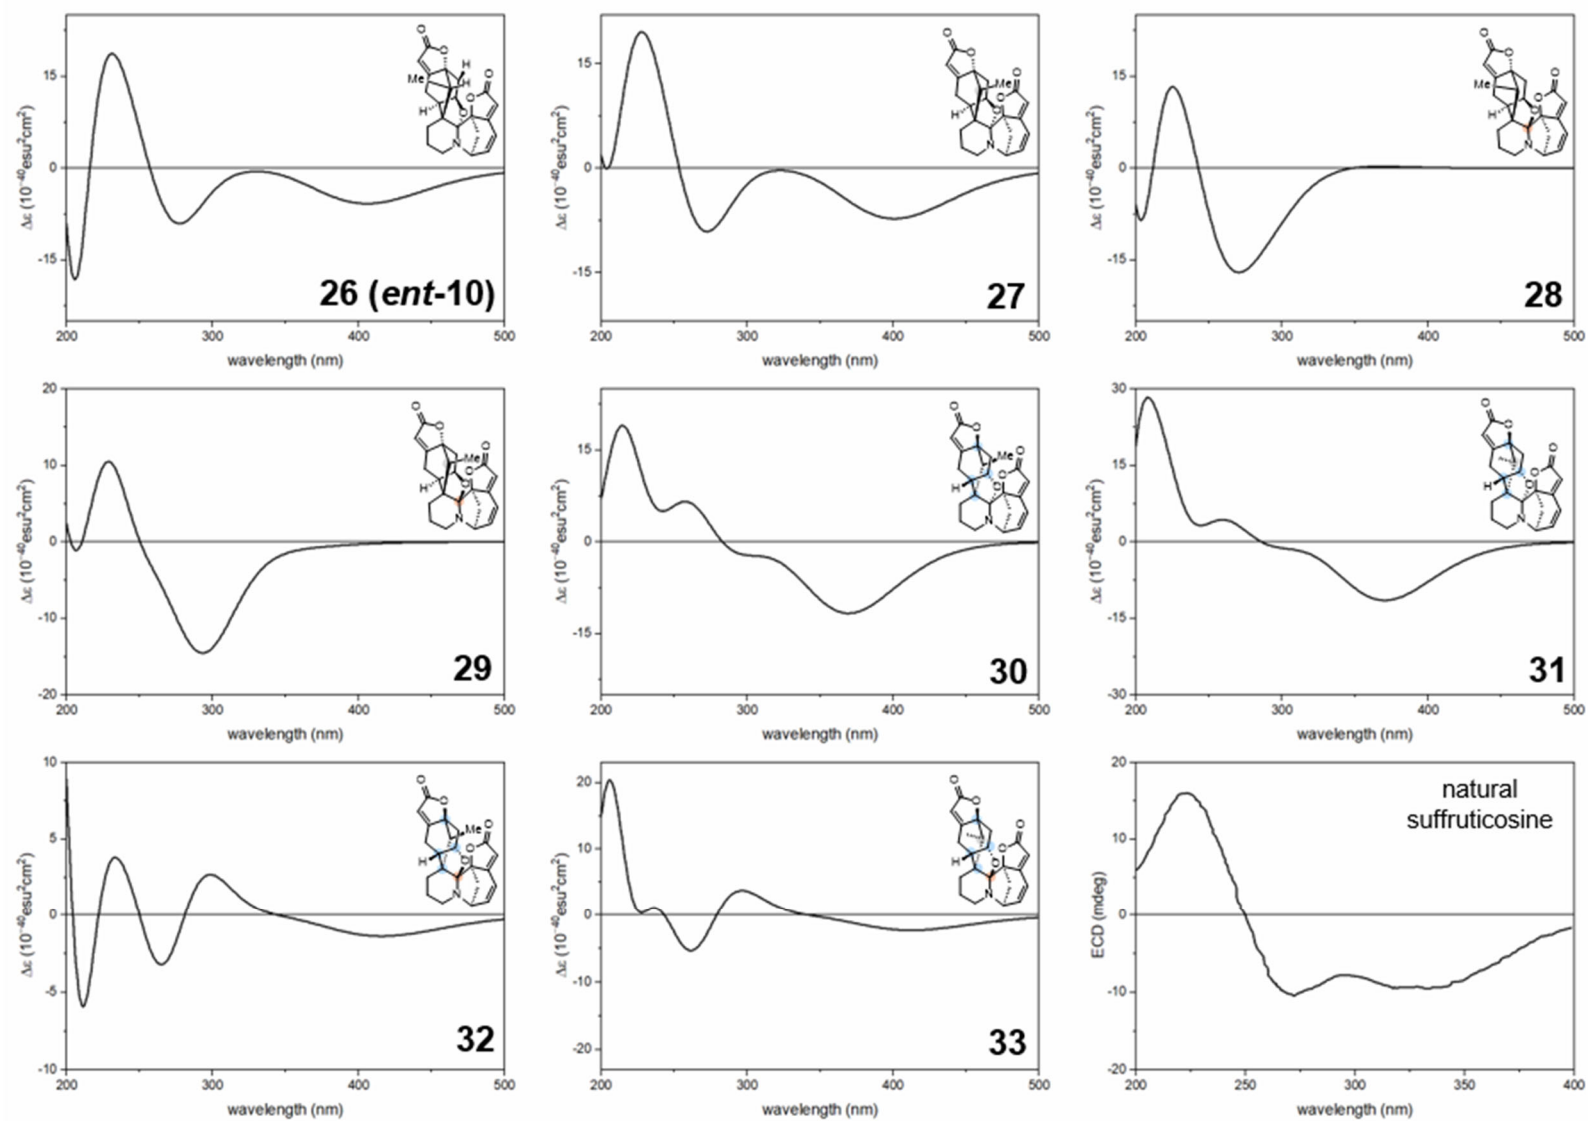

**Figure S48.** Calculated ECD spectra of all possible structures of suffruticosine and experimental ECD spectrum of suffruticosine<sup>12</sup>.

### 12.1 Analysis of shifts of band 3 by TDDFT calculation

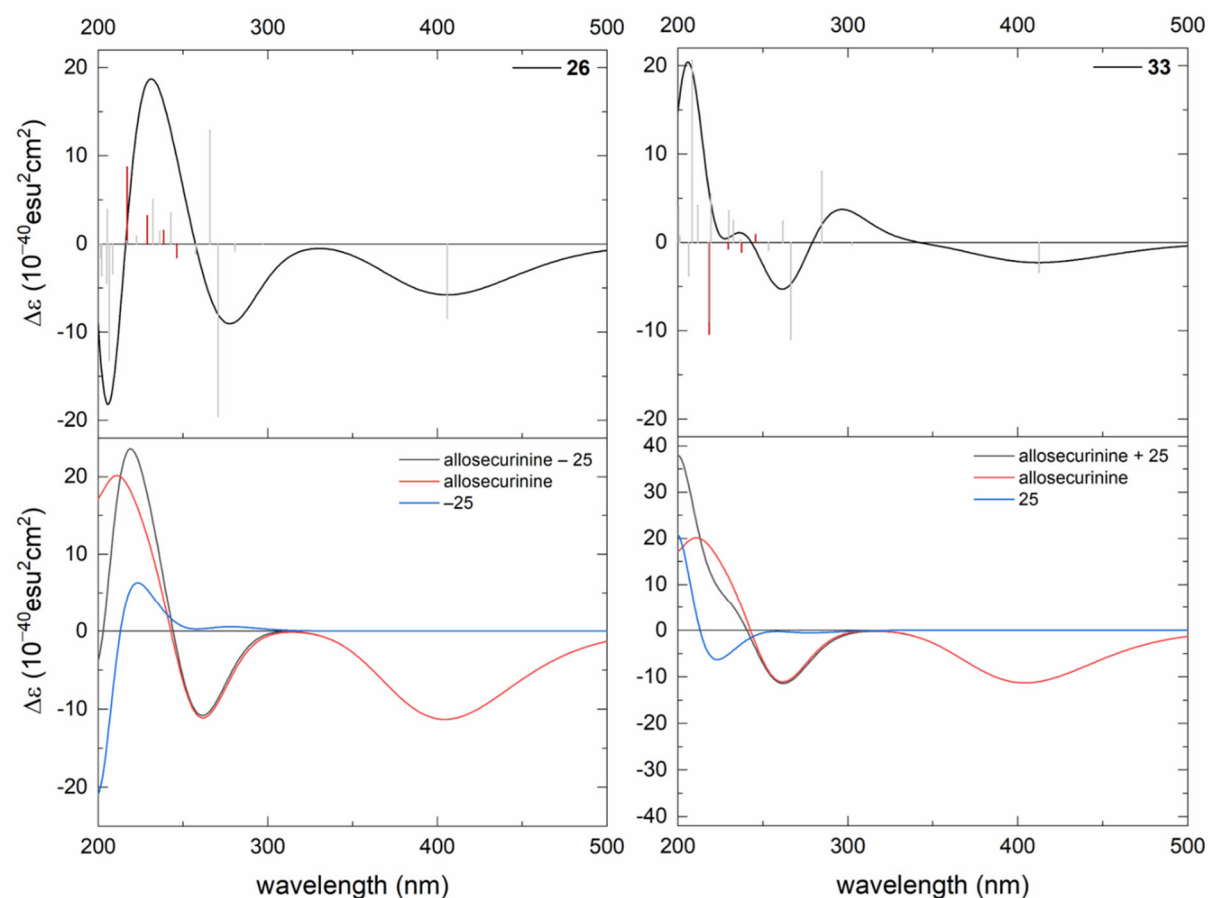

**Figure S49.** Fragment analysis of ECD spectrum by using TDDFT calculations.

Among the DFT models, structures **26** and **33** play a crucial role in the comparison, considering factors such as relative energies and ROESY correlations. Structure **26** was compared by overlaying the simulated ECD spectra of *ent*-**25** (**-25**) and allosecurinine (**14**), while structure **33** was compared using the overlay of simulated ECD spectra of **25** and allosecurinine (**14**). Consistent with the experimental results, the DFT model exhibits a redshift in band 3 for *ent*-**25** (Figure S48, bottom left) and a blueshift in band 3 for **25** (Figure S48, bottom right).

To identify which specific transition contributes to the energy shift, we analyzed each transition individually. In the band 3 region (250 nm), the red sticks corresponding to the same transition but exhibits an opposite sign (Table S20, S21). All transitions involve the western  $\pi^*$ , and it is evident that the major discrepancy in band 3 arises from the opposite sign and intensity of the O1 to the western  $\pi^*$ .

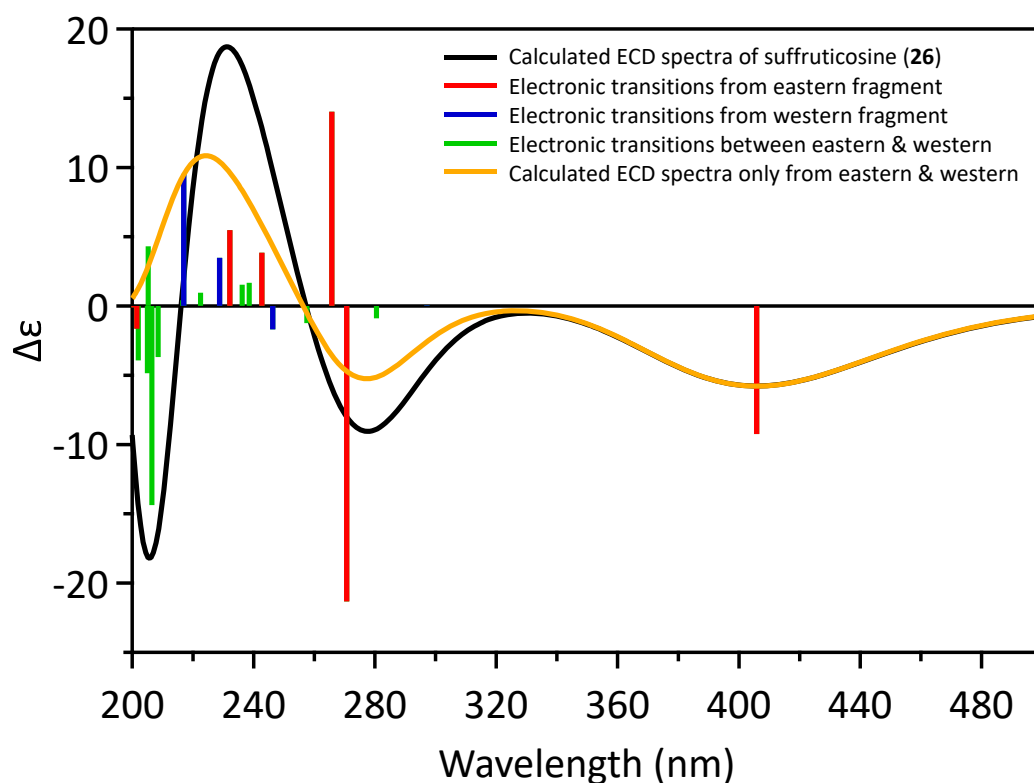

**Figure S50.** Calculated ECD spectra of suffruticosine and the categorization of its electronic transitions.

The calculated CD spectrum of suffruticosine (black) and the sum of those of the eastern and western parts (orange) are overlaid, displaying that the energy positions of band 3 are predicted to be different while those of band 1 and band 2 are identical. This discrepancy in band 3 is well reproduced with experimental data comparisons as seen in Figure 5 in the main text. Details of the transition characters can explain this discrepancy. The calculated excited states of suffruticosine are noted with sticks in Figure S50 and can be classified into three groups, transitions within the eastern part (red), those within the western part (blue), and CT transitions between the two fragments (green). This plot reveals that the band 3 of suffruticosine indeed contains significant contributions from CT transitions between the two fragments. Thus, the limit in reconstructing the CD spectrum of suffruticosine by adding those of the two fragments can be attributed to the CT transitions between the fragments.

| Wavelength (nm) | Oscillator Strength | Rotatory Strength | Contributions                                                                                 | Assignments & notes          |
|-----------------|---------------------|-------------------|-----------------------------------------------------------------------------------------------|------------------------------|
| 246.29          | 0.0005              | -5.6275           | 77.3% H-4 → L+1, 6.46% H-2 → L+1, 5.27% H-4 → L, 5.23% H-1 → L+1                              | O4, O5 → π*(O4,O5-C1')       |
| 242.73          | 0.0083              | 12.821            | 48.9% H-6 → L, 38.8% H-4 → L, 2.87% H-3 → L, 2.60% H-4 → L+1                                  |                              |
| 238.55          | 0.0043              | 5.561             | 53.2% H-4 → L, 36.5% H-6 → L, 2.36% H-5 → L                                                   |                              |
| 236.22          | 0.0005              | 5.1597            | 79.8% H-1 → L+1, 10.9% H-4 → L+1, 6.81% H-2 → L+1                                             | π(O2,O3-C15) → π*(O4,O5-C1') |
| 232.18          | 0.0107              | 18.2686           | 93.8% H → L+2, 2.70% H-6 → L                                                                  |                              |
| 228.82          | 0.0438              | 11.5965           | 77.4% H-2 → L+1, 11.9% H-1 → L+1, 4.17% H-3 → L+1, 2.87% H-4 → L+1, 2.47% H-6 → L+1           | O1 → π*(O4,O5-C1')           |
| 222.53          | 0.0016              | 3.2096            | 95.8% H-7 → LUMO                                                                              |                              |
| 216.99          | 0.2832              | 31.7582           | 85.7% H-3 → L+1, 4.39% H-2 → L+1, 3.60% H-7 → L+1                                             | π(O4,O5-C1') → π*(O4,O5-C1') |
| 216.65          | 0.0028              | 1.3765            | 82.9% H-8 → L, 8.64% H-12 → L                                                                 |                              |
| 208.55          | 0.0085              | -12.2926          | 93.7% H-9 → L                                                                                 |                              |
| 206.51          | 0.0291              | -47.8907          | 42.8% H-5 → L+1, 37.5% H-6 → L+1, 5.09% H-8 → L+1, 3.31% H-7 → L+1, 2.05% H-9 → L+1           |                              |
| 205.26          | 0.0203              | 14.3872           | 30.0% H-10 → L, 28.0% H-12 → L, 17.7% H-11 → L, 7.23% H → L+3, 7.06% H-8 → L, 3.82% H-1 → L+2 |                              |

**Table S20.** Excitation energies (wavelength), oscillator strength, rotatory strength (velocity) and orbital contributions of each excited state of **26**. Excited states between 200 nm and 250 nm were only included. H: HOMO, L: LUMO.

| Wavelength (nm) | Oscillator Strength | Rotatory Strength | Contributions                                                                                                          | Assignments & notes          |
|-----------------|---------------------|-------------------|------------------------------------------------------------------------------------------------------------------------|------------------------------|
| 245.62          | 0.0003              | 3.1569            | 85.6% H-4 → L+1, 5.38% H-2 → L+1, 2.42% H-1 → L+1                                                                      | O4, O5 → π*(O4,O5-C1')       |
| 237.48          | 0.0011              | -4.071            | 80.4% H-1 → L+1, 9.88% H-2 → L+1, 3.84% H-4 → L, 3.69% H-4 → L+1                                                       | π(O2,O3-C15) → π*(O4,O5-C1') |
| 236.66          | 0.0051              | 0.9631            | 80.9% H-4 → L, 10.3% H-6 → L, 3.11% H-1 → L+1, 2.26% H-4 → L+1                                                         |                              |
| 232.61          | 0.0093              | 9.0795            | 76.5% H → L+2, 10.1% H-6 → L, 4.91% H-8 → L, 2.91% H-4 → L                                                             |                              |
| 229.96          | 0.0464              | 13.0661           | 40.8% H-6 → L, 27.6% H-2 → L+1, 12.2% H → L+2, 5.85% H-4 → L, 4.49% H-1 → L+1, 3.08% H-5 → L, 2.14% H-7 → L            |                              |
| 229.60          | 0.0009              | -2.7627           | 53.3% H-2 → L+1, 20.2% H-6 → L, 9.19% H-1 → L+1, 5.43% H → L+2, 2.84% H-4 → L, 2.25% H-4 → L+1                         | O1 → π*(O4,O5-C1')           |
| 219.46          | 0.0156              | 19.9403           | 56.3% H-8 → L, 29.5% H-7 → L, 2.93% H-3 → L+1, 2.70% H-10 → L, 2.31% H → L+2                                           |                              |
| 218.49          | 0.1832              | -37.7836          | 60.2% H-3 → L+1, 25.6% H-7 → L, 4.47% H-6 → L+1                                                                        | π(O4,O5-C1') → π*(O4,O5-C1') |
| 217.86          | 0.1029              | -32.9253          | 38.5% H-7 → L, 22.1% H-8 → L, 21.7% H-3 → L+1, 8.70% H-6 → L, 2.24% H-10 → L                                           |                              |
| 211.67          | 0.0143              | 15.1546           | 91.6% H → L+3, 4.19% H → L+4, 2.91% H → L+5                                                                            |                              |
| 208.39          | 0.0503              | 75.0425           | 45.0% H-5 → L+1, 28.0% H-6 → L+1, 11.8% H-7 → L+1, 4.04% H-3 → L+1, 3.32% H-11 → L+1, 2.61% H-4 → L+1, 2.24% H-9 → L+1 |                              |
| 206.47          | 0.0057              | -13.696           | 89.4% H-9 → L, 4.86% H-10 → L, 2.11% H-11 → L                                                                          |                              |

**Table S21.** Excitation energies (wavelength), oscillator strength, rotatory strength (velocity) and orbital contributions of each excited state of **33**. Excited states between 200 nm and 250 nm were only included. H: HOMO, L: LUMO.

## 12.2 DP4+ Probability analysis of possible eight candidates of suffruticosine (26–33)

All carbons were used for DP4+ analysis.<sup>8</sup> Protons used for DP4+ analysis were indicated in following chemical structures.

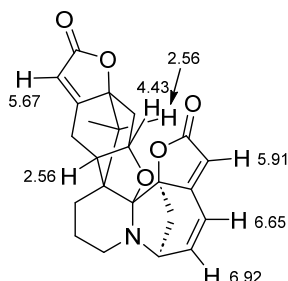

| Settings              |          |           | Type of data (shifts) |         |         |         | TMS 1H   | 32.198  | TMS 13C  | 184.105 |
|-----------------------|----------|-----------|-----------------------|---------|---------|---------|----------|---------|----------|---------|
| Default               |          |           | Shielding tensors     |         |         |         | Default  | $\mu$   | $\sigma$ | $\nu$   |
| Functional            | Solvent? | Basis Set |                       |         |         |         | 13Cu,sp2 | 7.279   | 2.647    | 14.742  |
| B3LYP                 | PCM      | 6-311G(d) |                       |         |         |         | 13Cu,sp3 | 5.165   | 2.355    | 20.697  |
|                       |          |           |                       |         |         |         | 1Hu,sp2  | 0.063   | 0.148    | 8.854   |
|                       |          |           |                       |         |         |         | 1Hu,sp3  | 0.019   | 0.112    | 3.466   |
|                       |          |           |                       |         |         |         | 13Cs     | -       | 1.841    | 7.315   |
|                       |          |           |                       |         |         |         | 1Hs      | -       | 0.103    | 3.228   |
| Isomer N <sup>o</sup> |          |           | 1                     | 2       | 3       | 4       | 5        | 6       | 7        | 8       |
| DP4+ (%)              |          | H data    | 100.00%               | 0.00%   | 0.00%   | 0.00%   | 0.00%    | 0.00%   | 0.00%    | 0.00%   |
|                       |          | C data    | 100.00%               | 0.00%   | 0.00%   | 0.00%   | 0.00%    | 0.00%   | 0.00%    | 0.00%   |
|                       |          | All data  | 100.00%               | 0.00%   | 0.00%   | 0.00%   | 0.00%    | 0.00%   | 0.00%    | 0.00%   |
| Type                  | sp2?     | Exp       | 1                     | 2       | 3       | 4       | 5        | 6       | 7        | 8       |
| C                     |          | 99.5      | 74.783                | 69.536  | 67.211  | 68.578  | 69.564   | 68.018  | 70.324   | 71.513  |
| C                     |          | 44.5      | 131.43                | 125.86  | 125.964 | 125.865 | 126.252  | 128.523 | 123.823  | 127.908 |
| C                     |          | 20.5      | 159.169               | 151.999 | 160.98  | 154.991 | 154.487  | 159.832 | 149.958  | 157.151 |
| C                     |          | 18.9      | 160.289               | 159.732 | 158.927 | 161.543 | 164.635  | 161.108 | 161.176  | 161.684 |
| C                     |          | 39.8      | 141.875               | 140.158 | 129.172 | 127.473 | 135.283  | 134.226 | 141.512  | 130.181 |
| C                     |          | 56.5      | 122.072               | 121.948 | 112.413 | 114.327 | 120.364  | 120.71  | 119.925  | 119.534 |
| C                     |          | 46.3      | 131.602               | 129.99  | 133.782 | 136.306 | 133.311  | 132.629 | 135.492  | 135.279 |
| C                     |          | 91.5      | 84.912                | 84.718  | 76.169  | 73.188  | 81.168   | 81.045  | 82.854   | 80.967  |
| C                     | x        | 171       | 6.869                 | 6.202   | 5.797   | 5.69    | 7.487    | 7.519   | 6.319    | 7.37    |
| C                     | x        | 111.9     | 68.112                | 66.92   | 74.283  | 74.461  | 70.47    | 69.898  | 70.252   | 70.537  |
| C                     | x        | 164.3     | 8.145                 | 6.602   | 1.071   | 1.561   | 7.87     | 7.216   | 1.841    | 2.423   |
| C                     | x        | 122.6     | 55.276                | 55.075  | 53.417  | 51.729  | 53.241   | 51.687  | 55.259   | 56.187  |
| C                     | x        | 146.5     | 25.479                | 25.116  | 31.265  | 33.111  | 21.773   | 22.471  | 24.665   | 25.811  |
| C                     | x        | 169       | -0.573                | -4.999  | -1.579  | -4.524  | -3.551   | -2.012  | -6.199   | -1.115  |
| C                     |          | 21.1      | 158.76                | 158.681 | 159.135 | 159.268 | 158.916  | 158.754 | 158.442  | 158.522 |
| C                     |          | 38.9      | 139.583               | 136.556 | 142.545 | 143.068 | 138.663  | 139.437 | 138.217  | 140.662 |
| C                     |          | 71.5      | 106.447               | 107.571 | 104.927 | 104.31  | 105.019  | 105.197 | 106.246  | 106.496 |
| C                     |          | 38.7      | 140.836               | 144.504 | 140.552 | 146.159 | 146.576  | 140.557 | 143.064  | 139.822 |
| C                     |          | 85.1      | 91.88                 | 92.636  | 91.655  | 91.62   | 90.198   | 91.063  | 92.721   | 91.724  |
| C                     | x        | 111.5     | 67.876                | 71.806  | 68.535  | 71.23   | 70.475   | 68.635  | 73.112   | 68.376  |
| C                     | x        | 173.3     | 5.707                 | 6.195   | 5.521   | 6.554   | 6.901    | 5.427   | 5.595    | 5.539   |
| C                     |          | 33.7      | 143.915               | 129.414 | 135.614 | 128.719 | 129.066  | 134.909 | 131.568  | 147.399 |
| C                     |          | 9.1       | 173.368               | 170.029 | 171.554 | 167.832 | 168.75   | 171.796 | 169.902  | 172.527 |
| H                     |          | 3.79      | 28.585                | 28.598  | 28.648  | 28.76   | 28.218   | 28.28   | 28.584   | 28.654  |
| H                     | x        | 5.91      | 26.652                | 26.687  | 26.955  | 26.978  | 26.762   | 26.712  | 26.73    | 26.717  |
| H                     | x        | 6.65      | 25.571                | 25.551  | 25.548  | 25.49   | 25.461   | 25.446  | 25.6     | 25.609  |
| H                     | x        | 6.92      | 25.126                | 25.107  | 25.339  | 25.382  | 24.957   | 24.979  | 24.952   | 25.01   |
| H                     |          | 2.56      | 29.818                | 29.537  | 29.383  | 29.303  | 30.485   | 30.099  | 29.852   | 29.857  |
| H                     |          | 4.43      | 28.033                | 28.053  | 28.522  | 28.555  | 27.744   | 27.787  | 28.275   | 28.26   |
| H                     | x        | 5.67      | 26.901                | 27.067  | 26.897  | 27.01   | 26.998   | 26.888  | 27.129   | 26.93   |
| H                     |          | 2.3       | 30.244                | 30.708  | 29.543  | 30.842  | 30.78    | 29.491  | 30.368   | 27.875  |

**Table S22.** Insertion of shielding tensor values of 8 candidates for DP4+ analysis (1: **26**, 2: **27**, 3: **28**, 4: **29**, 5: **30**, 6: **31**, 7: **32**, 8: **33**).

| Type | Exp   | 1     | 2     | 3     | 4     | 5     | 6     | 7     | 8     |
|------|-------|-------|-------|-------|-------|-------|-------|-------|-------|
| C    | 99.5  | 9.82  | 15.07 | 17.39 | 16.03 | 15.04 | 16.59 | 14.28 | 13.09 |
| C    | 44.5  | 8.18  | 13.75 | 13.64 | 13.74 | 13.35 | 11.08 | 15.78 | 11.70 |
| C    | 20.5  | 4.44  | 11.61 | 2.63  | 8.61  | 9.12  | 3.77  | 13.65 | 6.45  |
| C    | 18.9  | 4.92  | 5.47  | 6.28  | 3.66  | 0.57  | 4.10  | 4.03  | 3.52  |
| C    | 39.8  | 2.43  | 4.15  | 15.13 | 16.83 | 9.02  | 10.08 | 2.79  | 14.12 |
| C    | 56.5  | 5.53  | 5.66  | 15.19 | 13.28 | 7.24  | 6.90  | 7.68  | 8.07  |
| C    | 46.3  | 6.20  | 7.82  | 4.02  | 1.50  | 4.49  | 5.18  | 2.31  | 2.53  |
| C    | 91.5  | 7.69  | 7.89  | 16.44 | 19.42 | 11.44 | 11.56 | 9.75  | 11.64 |
| C    | 171   | 6.24  | 6.90  | 7.31  | 7.42  | 5.62  | 5.59  | 6.79  | 5.74  |
| C    | 111.9 | 4.09  | 5.29  | -2.08 | -2.26 | 1.74  | 2.31  | 1.95  | 1.67  |
| C    | 164.3 | 11.66 | 13.20 | 18.73 | 18.24 | 11.94 | 12.59 | 17.96 | 17.38 |
| C    | 122.6 | 6.23  | 6.43  | 8.09  | 9.78  | 8.26  | 9.82  | 6.25  | 5.32  |
| C    | 146.5 | 12.13 | 12.49 | 6.34  | 4.49  | 15.83 | 15.13 | 12.94 | 11.79 |
| C    | 169   | 15.68 | 20.10 | 16.68 | 19.63 | 18.66 | 17.12 | 21.30 | 16.22 |
| C    | 21.1  | 4.25  | 4.32  | 3.87  | 3.74  | 4.09  | 4.25  | 4.56  | 4.48  |
| C    | 38.9  | 5.62  | 8.65  | 2.66  | 2.14  | 6.54  | 5.77  | 6.99  | 4.54  |
| C    | 71.5  | 6.16  | 5.03  | 7.68  | 8.30  | 7.59  | 7.41  | 6.36  | 6.11  |
| C    | 38.7  | 4.57  | 0.90  | 4.85  | -0.75 | -1.17 | 4.85  | 2.34  | 5.58  |
| C    | 85.1  | 7.13  | 6.37  | 7.35  | 7.39  | 8.81  | 7.94  | 6.28  | 7.28  |
| C    | 111.5 | 4.73  | 0.80  | 4.07  | 1.38  | 2.13  | 3.97  | -0.51 | 4.23  |
| C    | 173.3 | 5.10  | 4.61  | 5.28  | 4.25  | 3.90  | 5.38  | 5.21  | 5.27  |
| C    | 33.7  | 6.49  | 20.99 | 14.79 | 21.69 | 21.34 | 15.50 | 18.84 | 3.01  |
| C    | 9.1   | 1.64  | 4.98  | 3.45  | 7.17  | 6.26  | 3.21  | 5.10  | 2.48  |
| -    | -     | -     | -     | -     | -     | -     | -     | -     | -     |
| H    | 3.79  | -0.18 | -0.19 | -0.24 | -0.35 | 0.19  | 0.13  | -0.18 | -0.25 |
| H    | 5.91  | -0.36 | -0.40 | -0.67 | -0.69 | -0.47 | -0.42 | -0.44 | -0.43 |
| H    | 6.65  | -0.02 | 0.00  | 0.00  | 0.06  | 0.09  | 0.10  | -0.05 | -0.06 |
| H    | 6.92  | 0.15  | 0.17  | -0.06 | -0.10 | 0.32  | 0.30  | 0.33  | 0.27  |
| H    | 2.56  | -0.18 | 0.10  | 0.26  | 0.34  | -0.85 | -0.46 | -0.21 | -0.22 |
| H    | 4.43  | -0.26 | -0.28 | -0.75 | -0.79 | 0.02  | -0.02 | -0.51 | -0.49 |
| H    | 5.67  | -0.37 | -0.54 | -0.37 | -0.48 | -0.47 | -0.36 | -0.60 | -0.40 |
| H    | 2.3   | -0.35 | -0.81 | 0.36  | -0.94 | -0.88 | 0.41  | -0.47 | 2.02  |

**Table S23.** Unscaled errors for 8 candidates (1: **26**, 2: **27**, 3: **28**, 4: **29**, 5: **30**, 6: **31**, 7: **32**, 8: **33**).



| Type | Exp   | 1     | 2     | 3      | 4      | 5     | 6     | 7     | 8     |
|------|-------|-------|-------|--------|--------|-------|-------|-------|-------|
| C    | 99.5  | 2.55  | 6.27  | 8.11   | 6.69   | 6.18  | 7.56  | 5.29  | 4.83  |
| C    | 44.5  | 2.84  | 5.95  | 5.70   | 5.32   | 5.71  | 3.84  | 8.20  | 5.32  |
| C    | 20.5  | 0.05  | 4.27  | -4.52  | 0.66   | 2.08  | -2.54 | 6.75  | 1.05  |
| C    | 18.9  | 0.57  | -1.73 | -0.91  | -4.18  | -6.25 | -2.18 | -2.58 | -1.73 |
| C    | 39.8  | -2.55 | -3.40 | 7.26   | 8.44   | 1.58  | 3.01  | -4.33 | 7.82  |
| C    | 56.5  | -0.12 | -2.21 | 6.94   | 4.68   | -0.53 | -0.57 | -0.01 | 1.41  |
| C    | 46.3  | 0.87  | 0.09  | -3.74  | -6.75  | -2.99 | -1.94 | -4.97 | -3.61 |
| C    | 91.5  | 0.77  | -0.64 | 7.35   | 10.16  | 2.83  | 2.92  | 1.09  | 3.69  |
| C    | 171   | -3.36 | -3.02 | -3.39  | -2.93  | -4.58 | -5.23 | -3.89 | -4.66 |
| C    | 111.9 | -3.41 | -3.56 | -11.20 | -11.50 | -7.11 | -6.67 | -7.04 | -6.62 |
| C    | 164.3 | 2.11  | 3.29  | 7.93   | 7.84   | 1.75  | 1.76  | 7.18  | 6.82  |
| C    | 122.6 | -1.71 | -2.62 | -1.52  | 0.17   | -0.95 | 0.31  | -3.14 | -3.45 |
| C    | 146.5 | 3.17  | 2.90  | -3.77  | -5.41  | 5.94  | 4.76  | 2.75  | 2.01  |
| C    | 169   | 5.83  | 9.99  | 5.82   | 9.12   | 8.22  | 6.02  | 10.30 | 5.54  |
| C    | 21.1  | -0.16 | -2.89 | -3.31  | -4.15  | -2.85 | -2.09 | -2.11 | -0.88 |
| C    | 38.9  | 0.57  | 1.04  | -4.90  | -6.01  | -0.83 | -1.15 | -0.22 | -1.41 |
| C    | 71.5  | -0.03 | -3.09 | -0.75  | -0.47  | -0.51 | -0.52 | -1.69 | -0.98 |
| C    | 38.7  | -0.44 | -6.57 | -2.76  | -8.85  | -8.37 | -2.03 | -4.74 | -0.40 |
| C    | 85.1  | 0.44  | -2.02 | -1.38  | -1.58  | 0.39  | -0.40 | -2.12 | -0.30 |
| C    | 111.5 | -2.78 | -7.96 | -5.19  | -7.92  | -6.71 | -5.04 | -9.42 | -4.13 |
| C    | 173.3 | -4.53 | -5.31 | -5.42  | -6.08  | -6.30 | -5.50 | -5.48 | -5.19 |
| C    | 33.7  | 1.58  | 13.25 | 7.07   | 13.31  | 13.76 | 8.45  | 11.45 | -2.72 |
| C    | 9.1   | -2.26 | -2.04 | -3.45  | -0.57  | -0.47 | -2.75 | -1.27 | -2.41 |
| -    | -     | -     | -     | -      | -      | -     | -     | -     | -     |
| H    | 3.79  | 0.06  | 0.11  | -0.17  | 0.06   | 0.52  | 0.17  | 0.15  | -0.63 |
| H    | 5.91  | -0.21 | -0.22 | -0.41  | -0.35  | -0.35 | -0.38 | -0.24 | -0.32 |
| H    | 6.65  | 0.08  | 0.11  | 0.41   | 0.34   | 0.02  | 0.15  | 0.08  | 0.33  |
| H    | 6.92  | 0.24  | 0.25  | 0.37   | 0.17   | 0.19  | 0.35  | 0.41  | 0.81  |
| H    | 2.56  | 0.12  | 0.46  | 0.25   | 0.76   | -0.19 | -0.43 | 0.19  | -0.90 |
| H    | 4.43  | -0.05 | -0.02 | -0.67  | -0.39  | 0.29  | 0.02  | -0.20 | -0.77 |
| H    | 5.67  | -0.21 | -0.33 | -0.11  | -0.14  | -0.31 | -0.32 | -0.37 | -0.35 |
| H    | 2.3   | -0.03 | -0.37 | 0.33   | -0.46  | -0.18 | 0.44  | -0.03 | 1.84  |

**Table S24.** Scaled errors for 8 candidates (1: **26**, 2: **27**, 3: **28**, 4: **29**, 5: **30**, 6: **31**, 7: **32**, 8: **33**).

| Default parameters | 1       | 2     | 3     | 4     | 5     | 6      | 7     | 8     |
|--------------------|---------|-------|-------|-------|-------|--------|-------|-------|
| sDP4+ (H data)     | 99.70%  | 0.05% | 0.00% | 0.00% | 0.01% | 0.00%  | 0.24% | 0.00% |
| sDP4+ (C data)     | 100.00% | 0.00% | 0.00% | 0.00% | 0.00% | 0.00%  | 0.00% | 0.00% |
| sDP4+ (all data)   | 100.00% | 0.00% | 0.00% | 0.00% | 0.00% | 0.00%  | 0.00% | 0.00% |
| uDP4+ (H data)     | 64.91%  | 2.10% | 0.12% | 0.00% | 0.08% | 32.74% | 0.04% | 0.00% |
| uDP4+ (C data)     | 100.00% | 0.00% | 0.00% | 0.00% | 0.00% | 0.00%  | 0.00% | 0.00% |
| uDP4+ (all data)   | 100.00% | 0.00% | 0.00% | 0.00% | 0.00% | 0.00%  | 0.00% | 0.00% |
| DP4+ (H data)      | 100.00% | 0.00% | 0.00% | 0.00% | 0.00% | 0.00%  | 0.00% | 0.00% |
| DP4+ (C data)      | 100.00% | 0.00% | 0.00% | 0.00% | 0.00% | 0.00%  | 0.00% | 0.00% |
| DP4+ (all data)    | 100.00% | 0.00% | 0.00% | 0.00% | 0.00% | 0.00%  | 0.00% | 0.00% |

**Table S25.** Detailed results for 8 candidates (1: **26**, 2: **27**, 3: **28**, 4: **29**, 5: **30**, 6: **31**, 7: **32**, 8: **33**).

### 13. Cartesian Coordinates of the Optimized Geometries

*All optimized structures have no imaginary frequencies.*

#### Allosecurinine, conformer 1a

|   |          |          |          |   |          |          |          |
|---|----------|----------|----------|---|----------|----------|----------|
| C | -0.98241 | 1.033132 | 2.105534 | H | 0.10805  | 1.071134 | 2.212702 |
| C | -1.43772 | -0.42502 | 2.15116  | H | -1.39865 | 1.604726 | 2.940244 |
| C | -0.67536 | -1.21874 | 1.094751 | H | -1.24661 | -0.87185 | 3.131037 |
| N | -0.80171 | -0.63439 | -0.24331 | H | -2.51905 | -0.48789 | 1.977434 |
| C | -1.254   | 0.761345 | -0.45653 | H | -1.02717 | -2.25791 | 1.060763 |
| C | -1.42183 | 1.675206 | 0.784312 | H | 0.377608 | -1.25441 | 1.412484 |
| C | 0.296513 | -0.92529 | -1.19115 | H | -2.22793 | 0.729799 | -0.96128 |
| C | 1.657662 | -0.50345 | -0.63901 | H | -0.89848 | 2.623005 | 0.628744 |
| C | 1.98309  | 0.801201 | -0.563   | H | -2.48226 | 1.930232 | 0.865509 |
| C | 1.04981  | 1.769332 | -1.09456 | H | 0.299752 | -1.98637 | -1.45007 |
| C | -0.28882 | 1.270074 | -1.57355 | H | 2.35155  | -1.26308 | -0.29289 |
| C | 1.156032 | 3.078927 | -1.39205 | H | 2.941558 | 1.134314 | -0.17879 |
| C | -0.03639 | 3.484915 | -2.14088 | H | 1.982779 | 3.748506 | -1.20208 |
| O | -0.86356 | 2.382812 | -2.26394 | H | -0.99127 | -0.34876 | -2.86177 |
| O | -0.33613 | 4.547312 | -2.62999 | H | 0.723051 | 0.069174 | -3.12492 |
| C | -0.06912 | -0.017   | -2.38091 |   |          |          |          |

#### Allosecurinine, conformer 1b

|   |          |          |          |   |          |          |          |
|---|----------|----------|----------|---|----------|----------|----------|
| C | -1.34996 | 0.383821 | 2.425413 | H | -0.90646 | 0.740156 | 3.359412 |
| C | -1.37125 | -1.16871 | 2.391241 | H | -2.37578 | 0.764231 | 2.408476 |
| C | -0.34445 | -1.73225 | 1.406897 | H | -1.18193 | -1.58064 | 3.386116 |
| N | -0.64703 | -1.23745 | 0.063126 | H | -2.36115 | -1.52373 | 2.087929 |
| C | -0.89553 | 0.224753 | -0.04424 | H | -0.39718 | -2.82567 | 1.385414 |
| C | -0.56261 | 0.979531 | 1.241935 | H | 0.672724 | -1.47175 | 1.741751 |
| C | 0.273745 | -1.62394 | -1.03166 | H | -1.95685 | 0.392647 | -0.27377 |
| C | 1.737233 | -1.34073 | -0.70333 | H | 0.510232 | 0.920299 | 1.444445 |
| C | 2.216684 | -0.08231 | -0.72463 | H | -0.80144 | 2.040431 | 1.122581 |
| C | 1.322605 | 0.981274 | -1.12541 | H | 0.134455 | -2.67851 | -1.2771  |
| C | -0.12811 | 0.628933 | -1.3386  | H | 2.384687 | -2.16929 | -0.43321 |
| C | 1.512752 | 2.267841 | -1.47254 | H | 3.254725 | 0.141702 | -0.50214 |
| C | 0.251376 | 2.799618 | -1.99721 | H | 2.425739 | 2.845615 | -1.45086 |
| O | -0.6993  | 1.796226 | -1.93621 | H | -1.21625 | -0.90317 | -2.45723 |
| O | -0.01774 | 3.887016 | -2.44693 | H | 0.458805 | -0.66762 | -3.02504 |
| C | -0.19376 | -0.67333 | -2.15163 |   |          |          |          |

**Allosecurinine, conformer 1c**

|   |          |          |          |   |          |          |          |
|---|----------|----------|----------|---|----------|----------|----------|
| C | 0.000674 | -0.00698 | 2.702561 | H | 1.654806 | -1.29289 | 2.169384 |
| C | 0.605132 | -1.39605 | 2.468941 | H | 0.58833  | -1.98881 | 3.389666 |
| C | -0.18339 | -2.13602 | 1.380321 | H | -1.03862 | -0.10858 | 3.04281  |
| N | -0.41738 | -1.35413 | 0.174515 | H | 0.538369 | 0.520729 | 3.495974 |
| C | -0.67976 | 0.087739 | 0.262759 | H | 0.320331 | -3.06361 | 1.096699 |
| C | 0.057582 | 0.809559 | 1.405061 | H | -1.15578 | -2.42808 | 1.807816 |
| C | 0.197956 | -1.6695  | -1.11924 | H | -1.75839 | 0.258706 | 0.400185 |
| C | 1.688364 | -1.33686 | -1.16148 | H | 1.108872 | 0.9651   | 1.146989 |
| C | 2.103401 | -0.05933 | -1.27351 | H | -0.38577 | 1.800396 | 1.547001 |
| C | 1.100038 | 0.975745 | -1.38662 | H | 0.02672  | -2.71659 | -1.37426 |
| C | -0.3415  | 0.571795 | -1.18602 | H | 2.409228 | -2.1448  | -1.07829 |
| C | 1.141736 | 2.275296 | -1.73551 | H | 3.155528 | 0.203202 | -1.30954 |
| C | -0.23228 | 2.772465 | -1.84686 | H | 2.00369  | 2.885817 | -1.9641  |
| O | -1.0949  | 1.735347 | -1.53887 | H | -1.63685 | -0.96375 | -2.06161 |
| O | -0.65283 | 3.859539 | -2.16195 | H | -0.18409 | -0.60886 | -3.03866 |
| C | -0.58023 | -0.69359 | -2.02615 |   |          |          |          |

**Allosecurinine, conformer 1d**

|   |          |          |          |   |          |          |          |
|---|----------|----------|----------|---|----------|----------|----------|
| C | 0.738675 | 0.197039 | 2.151086 | H | 1.693644 | -1.74823 | 1.959943 |
| C | 0.7347   | -1.34645 | 2.298671 | H | 0.638961 | -1.63265 | 3.35138  |
| C | -0.41605 | -2.01338 | 1.514468 | H | 0.886583 | 0.671192 | 3.125405 |
| N | -0.74071 | -1.41374 | 0.224871 | H | 1.591328 | 0.501099 | 1.540952 |
| C | -0.98436 | 0.042749 | 0.227766 | H | -0.20456 | -3.07381 | 1.35174  |
| C | -0.55361 | 0.74526  | 1.527637 | H | -1.32801 | -1.97757 | 2.122283 |
| C | 0.034415 | -1.76527 | -0.98731 | H | -2.0579  | 0.234215 | 0.09034  |
| C | 1.53554  | -1.53233 | -0.85023 | H | -0.46591 | 1.821387 | 1.346041 |
| C | 2.042892 | -0.28458 | -0.8848  | H | -1.37259 | 0.635279 | 2.24656  |
| C | 1.13013  | 0.817728 | -1.08929 | H | -0.16793 | -2.80125 | -1.26505 |
| C | -0.34556 | 0.508507 | -1.12149 | H | 2.18831  | -2.3887  | -0.71057 |
| C | 1.30755  | 2.119262 | -1.38954 | H | 3.107321 | -0.093   | -0.7993  |
| C | 0.00496  | 2.704579 | -1.71242 | H | 2.232228 | 2.673429 | -1.46471 |
| O | -0.95648 | 1.718175 | -1.57713 | H | -1.60337 | -0.94065 | -2.17625 |
| O | -0.29285 | 3.819423 | -2.06845 | H | -0.00563 | -0.7026  | -2.93536 |
| C | -0.54572 | -0.74613 | -1.98927 |   |          |          |          |

**Allosecurinine, conformer 2a**

|   |          |          |          |   |          |          |          |
|---|----------|----------|----------|---|----------|----------|----------|
| C | -1.54023 | 0.61408  | 1.113366 | H | -1.47276 | 1.528519 | 1.710485 |
| C | -0.8987  | -0.55827 | 1.88013  | H | -2.61059 | 0.412666 | 0.977853 |
| C | -0.82031 | -1.83907 | 1.031323 | H | 0.11983  | -0.28425 | 2.176548 |
| N | -0.20441 | -1.49408 | -0.23336 | H | -1.46111 | -0.75562 | 2.798799 |
| C | -0.93218 | -0.5     | -1.006   | H | -1.83271 | -2.26728 | 0.897762 |
| C | -0.90403 | 0.836433 | -0.27466 | H | -0.21243 | -2.59197 | 1.539545 |
| C | 0.415698 | -2.46812 | -1.15788 | H | -1.99595 | -0.78645 | -1.12605 |
| C | 1.873327 | -2.04526 | -1.31292 | H | 0.129427 | 1.182874 | -0.17217 |
| C | 2.165314 | -0.91415 | -1.98364 | H | -1.4621  | 1.598597 | -0.82799 |
| C | 1.085186 | -0.19431 | -2.62625 | H | 0.324097 | -3.49241 | -0.79562 |
| C | -0.33143 | -0.68186 | -2.42379 | H | 2.654806 | -2.63636 | -0.84557 |
| C | 1.069538 | 0.784953 | -3.55165 | H | 3.184544 | -0.56187 | -2.1018  |
| C | -0.29725 | 0.932598 | -4.05747 | H | 1.902687 | 1.342919 | -3.95479 |
| O | -1.10283 | 0.019029 | -3.40023 | H | -1.33568 | -2.62294 | -2.47655 |
| O | -0.7477  | 1.658885 | -4.91023 | H | 0.2079   | -2.61119 | -3.36811 |
| C | -0.31998 | -2.22211 | -2.49711 |   |          |          |          |

**Allosecurinine, conformer 2b**

|   |          |          |          |   |          |          |          |
|---|----------|----------|----------|---|----------|----------|----------|
| C | -0.80041 | 0.6417   | 1.064752 | H | 0.211179 | 0.581123 | 1.476111 |
| C | -1.54715 | -0.66646 | 1.379765 | H | -1.29104 | 1.480306 | 1.567114 |
| C | -0.8391  | -1.89633 | 0.754863 | H | -1.6345  | -0.80515 | 2.460632 |
| N | -0.08323 | -1.44679 | -0.40443 | H | -2.57083 | -0.59644 | 0.9973   |
| C | -0.77061 | -0.43398 | -1.2005  | H | -1.58738 | -2.66852 | 0.500143 |
| C | -0.72154 | 0.909481 | -0.46324 | H | -0.1454  | -2.34392 | 1.474148 |
| C | 0.582749 | -2.40042 | -1.32175 | H | -1.82978 | -0.70417 | -1.35936 |
| C | 2.03879  | -1.96175 | -1.41972 | H | 0.198618 | 1.45325  | -0.69638 |
| C | 2.347961 | -0.83156 | -2.08368 | H | -1.55665 | 1.536673 | -0.78991 |
| C | 1.286372 | -0.12214 | -2.76635 | H | 0.491519 | -3.42796 | -0.96874 |
| C | -0.13298 | -0.61545 | -2.60233 | H | 2.805813 | -2.54291 | -0.91743 |
| C | 1.293316 | 0.858034 | -3.69021 | H | 3.368037 | -0.47109 | -2.16361 |
| C | -0.06052 | 1.003045 | -4.23194 | H | 2.135069 | 1.420407 | -4.06861 |
| O | -0.88074 | 0.087648 | -3.59715 | H | -1.12826 | -2.5593  | -2.68965 |
| O | -0.48963 | 1.729983 | -5.09497 | H | 0.438051 | -2.53974 | -3.53945 |
| C | -0.11375 | -2.15456 | -2.68142 |   |          |          |          |

**Securinine, conformer 1a**

|   |          |          |          |   |          |          |          |
|---|----------|----------|----------|---|----------|----------|----------|
| C | 0.120888 | -0.09653 | 0.784806 | H | 0.992199 | -0.42855 | 1.354673 |
| N | -0.47098 | -1.32316 | 0.172874 | H | -0.47413 | -2.04387 | -1.82021 |
| C | 0.101999 | -1.35541 | -1.2022  | H | 1.782951 | -2.83491 | -1.35432 |
| C | 1.557849 | -1.7923  | -1.15438 | H | 3.586965 | -1.22077 | -0.8495  |
| C | 2.544281 | -0.9216  | -0.86706 | H | 3.92465  | 1.770411 | -0.47251 |
| C | 2.178389 | 0.451327 | -0.58471 | H | -1.0315  | 0.444912 | -1.74405 |
| C | 0.702347 | 0.731885 | -0.44616 | H | 0.520675 | 0.330076 | -2.59909 |
| C | 2.857775 | 1.601594 | -0.44071 | H | -0.58507 | 0.250488 | 2.775168 |
| C | 1.888516 | 2.692197 | -0.27287 | H | -0.42209 | 1.708871 | 1.821294 |
| O | 0.614697 | 2.150267 | -0.30621 | H | -2.8148  | 1.048644 | 2.332336 |
| O | 2.057512 | 3.879263 | -0.14017 | H | -2.53142 | 1.15425  | 0.600863 |
| C | 0.006013 | 0.117806 | -1.66078 | H | -3.73421 | -0.99148 | 1.190375 |
| C | -0.76518 | 0.673216 | 1.781086 | H | -2.38339 | -1.44338 | 2.227009 |
| C | -2.26577 | 0.591039 | 1.503891 | H | -2.17467 | -2.50968 | -0.01036 |
| C | -2.65501 | -0.87614 | 1.328489 | H | -2.35603 | -0.93768 | -0.78013 |
| C | -1.94548 | -1.44579 | 0.107547 |   |          |          |          |

**Securinine, conformer 1b**

|   |          |          |          |   |          |          |          |
|---|----------|----------|----------|---|----------|----------|----------|
| C | -0.14904 | 0.803552 | 0.880863 | H | 0.581193 | 0.518164 | 1.646887 |
| N | -0.65856 | -0.42906 | 0.204924 | H | -0.87425 | -0.91091 | -1.85088 |
| C | -0.19926 | -0.34789 | -1.20706 | H | 1.334409 | -1.93803 | -1.62428 |
| C | 1.207605 | -0.91863 | -1.27415 | H | 3.277894 | -0.58156 | -0.90009 |
| C | 2.265568 | -0.19292 | -0.8676  | H | 3.907647 | 2.248677 | -0.14968 |
| C | 2.026328 | 1.158697 | -0.41127 | H | -1.1886  | 1.580309 | -1.5346  |
| C | 0.587657 | 1.594419 | -0.25863 | H | 0.334955 | 1.430277 | -2.43928 |
| C | 2.827945 | 2.204322 | -0.14175 | H | -0.8219  | 2.440763 | 2.105982 |
| C | 1.989101 | 3.378692 | 0.117927 | H | -1.91798 | 2.052708 | 0.798011 |
| O | 0.664002 | 2.997603 | 0.00741  | H | -1.49607 | 0.514524 | 3.40119  |
| O | 2.290096 | 4.52026  | 0.368242 | H | -2.96963 | 1.263925 | 2.827719 |
| C | -0.17853 | 1.165465 | -1.51386 | H | -3.56127 | -0.80325 | 1.921338 |
| C | -1.26435 | 1.608364 | 1.555058 | H | -1.98578 | -1.46166 | 2.327475 |
| C | -2.08316 | 0.714239 | 2.499454 | H | -2.32609 | -1.64343 | -0.07149 |
| C | -2.48622 | -0.62653 | 1.828284 | H | -2.70996 | 0.069182 | -0.21458 |
| C | -2.10278 | -0.65942 | 0.349358 |   |          |          |          |

**Securinine, conformer 1c**

|   |          |          |          |   |          |          |          |
|---|----------|----------|----------|---|----------|----------|----------|
| C | -0.0164  | 0.711402 | 0.865621 | H | 0.780991 | 0.416927 | 1.557986 |
| N | -0.52945 | -0.4903  | 0.153055 | H | -0.82863 | -0.89262 | -1.91222 |
| C | -0.14177 | -0.33899 | -1.27296 | H | 1.41398  | -1.87745 | -1.80367 |
| C | 1.276209 | -0.87426 | -1.41301 | H | 3.350271 | -0.50145 | -1.09686 |
| C | 2.331286 | -0.13805 | -1.0157  | H | 3.940233 | 2.321755 | -0.27175 |
| C | 2.078857 | 1.190181 | -0.49986 | H | -1.16005 | 1.586592 | -1.53418 |
| C | 0.635665 | 1.582026 | -0.27639 | H | 0.355369 | 1.479548 | -2.45297 |
| C | 2.863324 | 2.246815 | -0.22258 | H | -1.28519 | 0.824677 | 2.580625 |
| C | 2.005853 | 3.387296 | 0.115356 | H | -0.70032 | 2.380131 | 2.041885 |
| O | 0.686653 | 2.973795 | 0.04395  | H | -3.16929 | 2.016604 | 1.643703 |
| O | 2.286445 | 4.526635 | 0.396759 | H | -2.29656 | 2.443225 | 0.19862  |
| C | -0.14824 | 1.183364 | -1.53136 | H | -3.10155 | 0.527806 | -0.82011 |
| C | -1.10087 | 1.428515 | 1.686045 | H | -3.89649 | 0.04181  | 0.656994 |
| C | -2.42341 | 1.645643 | 0.935711 | H | -1.99525 | -1.19096 | 1.447394 |
| C | -2.92927 | 0.348647 | 0.245537 | H | -2.21285 | -1.65462 | -0.22148 |
| C | -1.93679 | -0.81483 | 0.420843 |   |          |          |          |

**Securinine, conformer 2a**

|   |          |          |          |   |          |          |          |
|---|----------|----------|----------|---|----------|----------|----------|
| C | -1.44582 | -1.37133 | 2.307048 | H | -0.6422  | -1.64189 | 3.003697 |
| C | -1.50429 | -2.4182  | 1.17671  | H | -2.37487 | -1.39912 | 2.884766 |
| C | -0.30423 | -2.31564 | 0.219579 | H | -2.41834 | -2.27038 | 0.591366 |
| N | -0.21307 | -0.93068 | -0.20282 | H | -1.55461 | -3.42498 | 1.604447 |
| C | 0.049961 | -0.00274 | 0.895089 | H | -0.4595  | -2.95115 | -0.6568  |
| C | -1.18272 | 0.060188 | 1.793009 | H | 0.617182 | -2.66299 | 0.721251 |
| C | 0.539311 | -0.46719 | -1.37932 | H | 0.882848 | -0.36709 | 1.523646 |
| C | 2.04955  | -0.61635 | -1.22844 | H | -2.04038 | 0.433387 | 1.224259 |
| C | 2.761275 | 0.237757 | -0.46448 | H | -1.01767 | 0.740375 | 2.633779 |
| C | 2.059382 | 1.322671 | 0.189614 | H | 0.181943 | -0.97664 | -2.27519 |
| C | 0.551066 | 1.275032 | 0.141605 | H | 2.54441  | -1.44259 | -1.72997 |
| C | 0.148912 | 1.027217 | -1.32178 | H | 3.836495 | 0.144977 | -0.35221 |
| C | 2.437315 | 2.446722 | 0.823588 | H | 0.697592 | 1.662304 | -2.01854 |
| C | 1.233375 | 3.213668 | 1.165163 | H | -0.92393 | 1.144398 | -1.47785 |
| O | 0.126331 | 2.506087 | 0.726014 | H | 3.434443 | 2.800784 | 1.042824 |
| O | 1.112236 | 4.28339  | 1.709942 |   |          |          |          |

**Securinine, conformer 2b**

|   |          |          |          |   |          |          |          |
|---|----------|----------|----------|---|----------|----------|----------|
| C | -1.94615 | -1.09117 | 1.479296 | H | -2.42773 | -1.07621 | 2.461279 |
| C | -1.10052 | -2.36854 | 1.331352 | H | -2.75098 | -1.11167 | 0.73909  |
| C | -0.45103 | -2.46656 | -0.07429 | H | -1.71364 | -3.25477 | 1.515425 |
| N | -0.34441 | -1.12016 | -0.61429 | H | -0.3189  | -2.37347 | 2.098374 |
| C | 0.08905  | -0.12394 | 0.366382 | H | -1.077   | -3.05793 | -0.75119 |
| C | -1.09928 | 0.196113 | 1.286008 | H | 0.52297  | -2.97895 | 0.001613 |
| C | 0.295703 | -0.82018 | -1.90227 | H | 0.914192 | -0.50951 | 0.987229 |
| C | 1.789967 | -1.12809 | -1.91458 | H | -1.71742 | 0.98803  | 0.854694 |
| C | 2.669292 | -0.31854 | -1.29045 | H | -0.72801 | 0.567598 | 2.246061 |
| C | 2.164948 | 0.876189 | -0.64694 | H | -0.2184  | -1.34729 | -2.70785 |
| C | 0.665112 | 1.011795 | -0.54022 | H | 2.135293 | -2.02794 | -2.41436 |
| C | 0.073402 | 0.708811 | -1.92726 | H | 3.735146 | -0.52177 | -1.2907  |
| C | 2.737544 | 1.985609 | -0.14656 | H | 0.601391 | 1.225799 | -2.72942 |
| C | 1.676113 | 2.918769 | 0.246555 | H | -0.99183 | 0.937649 | -1.97771 |
| O | 0.454077 | 2.326756 | -0.02343 | H | 3.787264 | 2.226425 | -0.05831 |
| O | 1.739836 | 4.030142 | 0.712464 |   |          |          |          |

**Hemiaminal ether 25, conformer 1**

|   |          |          |          |   |          |          |          |
|---|----------|----------|----------|---|----------|----------|----------|
| C | 1.720871 | -0.97194 | 0.931222 | C | -0.43464 | -1.88511 | 0.742249 |
| C | 0.763134 | 0.106063 | 0.378845 | C | -0.00933 | 2.289163 | 1.685355 |
| C | 1.491461 | 1.132209 | -0.50821 | H | 0.768501 | 1.748252 | -1.05123 |
| C | 2.492372 | 0.501023 | -1.48501 | H | 2.048017 | 1.81953  | 0.135513 |
| C | 3.424254 | -0.45225 | -0.74271 | H | 3.071491 | 1.293781 | -1.96866 |
| N | 2.612477 | -1.49162 | -0.09981 | H | 1.977334 | -0.04769 | -2.27946 |
| H | 3.208752 | -2.19593 | 0.324111 | H | 4.115449 | -0.94001 | -1.43487 |
| H | 2.270485 | -0.61675 | 1.815931 | H | 4.03713  | 0.117925 | -0.02126 |
| O | 0.86463  | -2.02879 | 1.367759 | H | 0.282134 | -1.30186 | -1.21715 |
| C | -0.2253  | -0.83633 | -0.37463 | H | 0.461302 | 0.395744 | 2.529572 |
| C | -0.0158  | 0.757573 | 1.612772 | H | -2.19198 | -0.86355 | -1.3162  |
| C | -1.46674 | 0.182283 | 1.63575  | H | -1.29261 | 0.602947 | -1.61437 |
| C | -1.51302 | -0.14398 | -0.84551 | H | -2.43198 | -1.75474 | 1.648117 |
| C | -2.16393 | 0.481152 | 0.343833 | H | -1.08691 | -1.62471 | 2.790573 |
| C | -1.42818 | -1.34543 | 1.791699 | H | -3.99426 | 1.588354 | -0.11187 |
| O | -2.28502 | 0.802602 | 2.641365 | H | -0.73358 | -2.86657 | 0.371911 |
| C | -3.35475 | 1.430486 | 2.035727 | H | -0.58028 | 2.619016 | 2.55457  |
| C | -3.2558  | 1.213365 | 0.582868 | H | 1.004752 | 2.671884 | 1.806654 |
| O | -4.183   | 2.0225   | 2.683719 | H | -0.44234 | 2.762252 | 0.801305 |

**Hemiaminal ether 25, conformer 2**

|   |          |          |          |   |          |          |          |
|---|----------|----------|----------|---|----------|----------|----------|
| C | 1.644451 | -1.08228 | 0.60694  | C | -0.51938 | -1.96509 | 0.595433 |
| C | 0.642148 | -0.01376 | 0.029244 | C | -0.08888 | 2.340994 | 0.996943 |
| C | 1.379159 | 0.831148 | -1.02068 | H | 0.7193   | 1.58949  | -1.44845 |
| C | 1.995459 | -0.01098 | -2.15646 | H | 2.177857 | 1.383058 | -0.51315 |
| C | 2.571812 | -1.35662 | -1.64421 | H | 2.782339 | 0.57987  | -2.63429 |
| N | 2.800556 | -1.39525 | -0.19643 | H | 1.248642 | -0.20429 | -2.93299 |
| H | 3.571331 | -0.7908  | 0.064379 | H | 1.894214 | -2.17895 | -1.88764 |
| H | 2.022974 | -0.75696 | 1.580914 | H | 3.517302 | -1.58819 | -2.13878 |
| O | 0.861089 | -2.28147 | 0.794378 | H | -0.16783 | -1.4159  | -1.45778 |
| C | -0.49051 | -0.92531 | -0.53972 | H | 0.709902 | 0.70725  | 2.09631  |
| C | 0.046027 | 0.831759 | 1.234265 | H | -2.57793 | -0.9359  | -1.16721 |
| C | -1.31037 | 0.183545 | 1.628229 | H | -1.74198 | 0.549804 | -1.54998 |
| C | -1.838   | -0.22611 | -0.7828  | H | -2.12693 | -1.76146 | 2.085413 |
| C | -2.29094 | 0.36613  | 0.510348 | H | -0.50143 | -1.51442 | 2.725995 |
| C | -1.14799 | -1.32885 | 1.865011 | H | -4.26113 | 1.312471 | 0.429742 |
| O | -1.92245 | 0.828579 | 2.757974 | H | -1.0187  | -2.89713 | 0.328895 |
| C | -3.15475 | 1.327028 | 2.384859 | H | -0.50781 | 2.820182 | 1.884042 |
| C | -3.36389 | 1.023597 | 0.959045 | H | 0.885956 | 2.795128 | 0.814867 |
| O | -3.865   | 1.899501 | 3.17476  | H | -0.73465 | 2.585334 | 0.151095 |

**Hemiaminal ether 25, conformer 3**

|   |          |          |          |   |          |          |          |
|---|----------|----------|----------|---|----------|----------|----------|
| C | 1.450638 | -1.38509 | 0.297464 | C | -2.93417 | 1.740914 | 0.998719 |
| C | 0.696448 | -0.10373 | -0.20146 | O | -3.11519 | 2.593604 | 3.272131 |
| C | 1.538988 | 0.591279 | -1.28232 | C | -0.85429 | -1.77774 | 0.34922  |
| C | 1.896554 | -0.34189 | -2.45904 | C | 0.536882 | 2.319279 | 0.854    |
| C | 2.184588 | -1.78837 | -1.9967  | H | 1.024005 | 1.475732 | -1.66531 |
| N | 2.520622 | -1.77808 | -0.57113 | H | 2.462867 | 0.950676 | -0.82114 |
| H | 2.913968 | -2.66207 | -0.26791 | H | 2.771789 | 0.071167 | -2.96783 |
| H | 1.884236 | -1.2319  | 1.289335 | H | 1.090529 | -0.34901 | -3.1981  |
| O | 0.422859 | -2.41177 | 0.441455 | H | 1.327777 | -2.44204 | -2.21256 |
| C | -0.64083 | -0.71264 | -0.73922 | H | 3.036014 | -2.20212 | -2.54048 |
| C | 0.360519 | 0.808777 | 1.052177 | H | -0.4788  | -1.21448 | -1.69271 |
| C | -1.0811  | 0.445951 | 1.508327 | H | 1.026638 | 0.519652 | 1.870796 |
| C | -1.80534 | 0.281495 | -0.87892 | H | -2.70128 | -0.22641 | -1.25058 |
| C | -2.05499 | 0.891062 | 0.460552 | H | -1.57334 | 1.055772 | -1.61824 |
| C | -1.24554 | -1.0768  | 1.681257 | H | -2.28204 | -1.28945 | 1.954127 |
| O | -1.47645 | 1.152363 | 2.696226 | H | -0.60911 | -1.44237 | 2.490524 |
| C | -2.58919 | 1.921536 | 2.419039 | H | -3.77305 | 2.242469 | 0.536821 |



|   |          |          |          |   |          |          |          |
|---|----------|----------|----------|---|----------|----------|----------|
| H | -1.57538 | -2.54993 | 0.078361 | H | 1.578536 | 2.563778 | 0.642221 |
| H | 0.260995 | 2.84677  | 1.769313 | H | -0.07238 | 2.722606 | 0.042571 |

**Suffruticosine, originally proposed (10)**

|   |          |          |          |   |          |          |          |
|---|----------|----------|----------|---|----------|----------|----------|
| C | 0.508315 | -1.23541 | -0.10853 | O | -4.3007  | 2.849532 | 2.634253 |
| C | -0.30855 | 0.046659 | -0.54025 | C | -1.82687 | -1.64025 | 0.065752 |
| C | 0.467641 | 0.823649 | -1.6184  | C | -0.51263 | 2.458449 | 0.550249 |
| C | 0.794191 | 0.00054  | -2.87789 | H | -0.08995 | 1.714144 | -1.91376 |
| C | 1.057782 | -1.49327 | -2.57061 | H | 1.399423 | 1.18922  | -1.18123 |
| N | 1.323147 | -1.77574 | -1.16928 | H | 1.66701  | 0.446347 | -3.36229 |
| C | 1.555185 | -1.22423 | 1.090037 | H | -0.02475 | 0.074738 | -3.59967 |
| C | 2.674315 | -2.13097 | -0.71297 | H | 0.205758 | -2.09773 | -2.90251 |
| C | 2.387447 | -2.4763  | 0.755427 | H | 1.912531 | -1.85633 | -3.14361 |
| C | 2.534729 | -0.06933 | 1.145934 | H | 3.053582 | -2.97931 | -1.28446 |
| C | 3.627008 | -0.94275 | -0.79613 | H | 3.279212 | -2.55891 | 1.376736 |
| C | 3.510022 | 0.067656 | 0.08514  | H | 1.787067 | -3.38204 | 0.836891 |
| O | 0.947149 | -1.23944 | 2.379629 | H | 4.37835  | -0.91557 | -1.57904 |
| C | 2.439573 | 0.519596 | 2.353492 | H | 4.16603  | 0.931437 | 0.06891  |
| C | 1.463014 | -0.21486 | 3.158049 | H | 3.024337 | 1.338293 | 2.747709 |
| O | 1.103102 | -0.06204 | 4.299291 | H | -1.4126  | -1.18503 | -1.99424 |
| O | -0.52048 | -2.18917 | 0.285013 | H | -0.13355 | 0.648109 | 1.569243 |
| C | -1.6119  | -0.63472 | -1.07654 | H | -3.66495 | -0.24338 | -1.67672 |
| C | -0.72235 | 0.946872 | 0.709527 | H | -2.56232 | 1.042779 | -2.09986 |
| C | -2.1933  | 0.606674 | 1.089045 | H | -3.40586 | -1.13035 | 1.506622 |
| C | -2.79599 | 0.316211 | -1.31485 | H | -1.77894 | -1.21864 | 2.195726 |
| C | -3.10658 | 1.003329 | -0.02773 | H | -4.8116  | 2.371168 | -0.11364 |
| C | -2.35247 | -0.90407 | 1.322815 | H | -2.47502 | -2.47436 | -0.20599 |
| O | -2.65085 | 1.366246 | 2.220196 | H | -0.80352 | 2.962863 | 1.473303 |
| C | -3.73595 | 2.133032 | 1.844655 | H | 0.537263 | 2.693006 | 0.372797 |
| C | -4.00384 | 1.887322 | 0.417357 | H | -1.09673 | 2.893998 | -0.26256 |

**Suffruticosine, structure 26**

|   |          |          |          |   |          |          |          |
|---|----------|----------|----------|---|----------|----------|----------|
| C | 0.508315 | -1.23541 | 0.108528 | C | 2.674315 | -2.13097 | 0.712965 |
| C | -0.30855 | 0.046659 | 0.540247 | C | 2.387447 | -2.4763  | -0.75543 |
| C | 0.467641 | 0.823649 | 1.618404 | C | 2.534729 | -0.06933 | -1.14593 |
| C | 0.794191 | 0.00054  | 2.877889 | C | 3.627008 | -0.94275 | 0.796128 |
| C | 1.057782 | -1.49327 | 2.570605 | C | 3.510022 | 0.067656 | -0.08514 |
| N | 1.323147 | -1.77574 | 1.169282 | O | 0.947149 | -1.23944 | -2.37963 |
| C | 1.555185 | -1.22423 | -1.09004 | C | 2.439573 | 0.519596 | -2.35349 |

|   |          |          |          |   |          |          |          |
|---|----------|----------|----------|---|----------|----------|----------|
| C | 1.463014 | -0.21486 | -3.15805 | H | 0.205758 | -2.09773 | 2.902507 |
| O | 1.103102 | -0.06204 | -4.29929 | H | 1.912531 | -1.85633 | 3.143605 |
| O | -0.52048 | -2.18917 | -0.28501 | H | 3.053582 | -2.97931 | 1.284464 |
| C | -1.6119  | -0.63472 | 1.076537 | H | 3.279212 | -2.55891 | -1.37674 |
| C | -0.72235 | 0.946872 | -0.70953 | H | 1.787067 | -3.38204 | -0.83689 |
| C | -2.1933  | 0.606674 | -1.08905 | H | 4.37835  | -0.91557 | 1.579043 |
| C | -2.79599 | 0.316211 | 1.314848 | H | 4.16603  | 0.931437 | -0.06891 |
| C | -3.10658 | 1.003329 | 0.02773  | H | 3.024337 | 1.338293 | -2.74771 |
| C | -2.35247 | -0.90407 | -1.32282 | H | -1.4126  | -1.18503 | 1.994238 |
| O | -2.65085 | 1.366246 | -2.2202  | H | -0.13355 | 0.648109 | -1.56924 |
| C | -3.73595 | 2.133032 | -1.84466 | H | -3.66495 | -0.24338 | 1.676719 |
| C | -4.00384 | 1.887322 | -0.41736 | H | -2.56232 | 1.042779 | 2.099862 |
| O | -4.3007  | 2.849532 | -2.63425 | H | -3.40586 | -1.13035 | -1.50662 |
| C | -1.82687 | -1.64025 | -0.06575 | H | -1.77894 | -1.21864 | -2.19573 |
| C | -0.51263 | 2.458449 | -0.55025 | H | -4.8116  | 2.371168 | 0.113638 |
| H | -0.08995 | 1.714144 | 1.91376  | H | -2.47502 | -2.47436 | 0.205989 |
| H | 1.399423 | 1.18922  | 1.18123  | H | -0.80352 | 2.962863 | -1.4733  |
| H | 1.66701  | 0.446347 | 3.362289 | H | 0.537263 | 2.693006 | -0.3728  |
| H | -0.02475 | 0.074738 | 3.599671 | H | -1.09673 | 2.893998 | 0.262562 |

### Suffruticosine, structure 27

|   |          |          |          |   |          |          |          |
|---|----------|----------|----------|---|----------|----------|----------|
| C | -3.6747  | 1.761859 | -1.81979 | C | 2.04832  | -0.66729 | 0.546312 |
| C | -2.84571 | 0.767512 | -1.49129 | C | 2.90991  | -1.93699 | 0.355059 |
| C | -1.46448 | 1.305995 | -1.28082 | C | 2.827256 | 0.948733 | 2.028199 |
| O | -1.59312 | 2.719899 | -1.50776 | C | 3.01852  | 1.414772 | 0.65688  |
| C | -2.90025 | 3.013569 | -1.84099 | O | 2.513095 | 0.453046 | -0.20014 |
| O | -3.24533 | 4.143353 | -2.08622 | O | 3.52638  | 2.422878 | 0.228216 |
| C | -2.9447  | -0.69919 | -1.24329 | O | 0.753111 | -1.23851 | -1.38063 |
| C | -1.53779 | -1.22894 | -0.92577 | C | -1.06649 | 0.96832  | 0.190282 |
| C | -0.48663 | -0.87168 | -1.99041 | C | -0.814   | -0.5995  | 0.323244 |
| C | -0.52339 | 0.647731 | -2.29688 | H | -4.735   | 1.730352 | -2.02739 |
| C | -0.07773 | 1.982582 | 0.759385 | H | -3.64008 | -0.90831 | -0.42387 |
| C | -1.34733 | -1.05421 | 1.696446 | H | -3.34976 | -1.2191  | -2.11766 |
| C | -1.46052 | -2.57621 | 1.89118  | H | -1.58946 | -2.31081 | -0.84328 |
| C | -0.4402  | -3.36469 | 1.043286 | H | -0.58366 | -1.46328 | -2.90198 |
| N | 0.70392  | -2.57995 | 0.60372  | H | 0.486068 | 1.053646 | -2.21602 |
| C | 0.630472 | -1.22853 | 0.074224 | H | -0.88745 | 0.848622 | -3.30753 |
| C | 2.027427 | -2.89922 | 1.155075 | H | -0.58132 | 2.944838 | 0.86198  |
| C | 2.087248 | -2.56841 | 2.64198  | H | 0.780914 | 2.140472 | 0.112613 |
| C | 2.142253 | -1.28178 | 3.028592 | H | 0.267658 | 1.689231 | 1.749461 |
| C | 2.264929 | -0.27376 | 1.995755 | H | -2.32675 | -0.60198 | 1.871456 |

|   |          |          |          |   |          |          |          |
|---|----------|----------|----------|---|----------|----------|----------|
| H | -0.68978 | -0.63181 | 2.463505 | H | 2.068805 | -3.37176 | 3.371625 |
| H | -1.32474 | -2.805   | 2.951379 | H | 2.197706 | -0.98917 | 4.071696 |
| H | -2.46853 | -2.91357 | 1.631941 | H | 2.959637 | -2.22189 | -0.69472 |
| H | -0.04798 | -4.20625 | 1.61628  | H | 3.914497 | -1.81336 | 0.759578 |
| H | -0.93941 | -3.81557 | 0.17813  | H | 3.179868 | 1.499011 | 2.888778 |
| H | 2.270752 | -3.94785 | 0.974875 | H | -1.98347 | 1.118137 | 0.768307 |

### Suffruticosine, structure 28

|   |          |          |          |   |          |          |          |
|---|----------|----------|----------|---|----------|----------|----------|
| C | -0.00309 | 1.685599 | -0.72187 | O | 0.541779 | -1.78878 | 2.396064 |
| C | 0.25187  | 0.694142 | 0.53749  | O | -0.90182 | -2.99826 | 3.641465 |
| C | -2.95924 | 3.346623 | -0.16454 | O | -0.2978  | -1.1458  | -0.77044 |
| C | -2.28753 | 2.237676 | 0.157167 | H | 0.466135 | 1.246236 | -1.60314 |
| C | -1.53709 | 1.737416 | -1.03686 | H | -3.61306 | 3.953614 | 0.445843 |
| O | -1.84271 | 2.67939  | -2.07804 | H | -3.10292 | 0.94558  | 1.649393 |
| C | -2.6926  | 3.64851  | -1.58099 | H | -1.77472 | 1.926642 | 2.217888 |
| O | -3.09631 | 4.545213 | -2.27981 | H | -1.06278 | -0.42011 | 1.867338 |
| C | -2.13373 | 1.360919 | 1.352322 | H | -2.21889 | -1.41385 | -0.04923 |
| C | -1.15136 | 0.230822 | 1.004616 | H | -3.17583 | 0.364593 | -1.3736  |
| C | -1.53842 | -0.5884  | -0.26502 | H | -1.73414 | -0.00234 | -2.33186 |
| C | -2.08274 | 0.342196 | -1.35667 | H | 0.029496 | 3.656381 | 0.257341 |
| C | 0.521647 | 3.120128 | -0.55675 | H | 1.591741 | 3.155439 | -0.37092 |
| C | 1.227902 | 1.268328 | 1.566114 | H | 0.339531 | 3.679955 | -1.47493 |
| C | 2.678219 | 1.2938   | 0.993654 | H | 0.923922 | 2.264859 | 1.888609 |
| C | 2.813717 | 0.686219 | -0.42577 | H | 1.193465 | 0.638649 | 2.45765  |
| N | 2.04982  | -0.56204 | -0.71306 | H | 3.351569 | 0.782136 | 1.683332 |
| C | 0.799432 | -0.67844 | 0.035857 | H | 3.051124 | 2.320079 | 0.943118 |
| C | 2.848958 | -1.78958 | -0.42232 | H | 3.864858 | 0.470508 | -0.62174 |
| C | 2.286194 | -2.98833 | -1.16819 | H | 3.882165 | -1.62015 | -0.71972 |
| C | 1.225499 | -3.66012 | -0.69054 | H | 2.768391 | -3.28937 | -2.0922  |
| C | 0.632427 | -3.19609 | 0.546861 | H | 0.822453 | -4.53562 | -1.18815 |
| C | 1.137453 | -1.88052 | 1.101718 | H | 3.140268 | -1.197   | 1.672097 |
| C | 2.661861 | -1.98507 | 1.094663 | H | 3.010708 | -2.95011 | 1.465575 |
| C | -0.21876 | -3.74581 | 1.429284 | H | -0.7413  | -4.68955 | 1.366409 |
| C | -0.28924 | -2.88224 | 2.609794 | H | 2.528467 | 1.429927 | -1.1693  |

### Suffruticosine, structure 29, conformer 1

|   |          |          |          |   |          |          |          |
|---|----------|----------|----------|---|----------|----------|----------|
| C | 0.054725 | 1.68375  | -0.73832 | C | -1.48329 | 1.735073 | -1.01795 |
| C | 0.342006 | 0.658654 | 0.489278 | O | -1.80197 | 2.723241 | -2.01441 |
| C | -2.82033 | 3.36134  | -0.04124 | C | -2.58921 | 3.70729  | -1.45187 |
| C | -2.18942 | 2.211327 | 0.211596 | O | -2.97469 | 4.648061 | -2.10183 |

|   |          |          |          |   |          |          |          |
|---|----------|----------|----------|---|----------|----------|----------|
| C | -2.03204 | 1.290405 | 1.368926 | H | -3.41844 | 3.973518 | 0.618922 |
| C | -1.05024 | 0.180782 | 0.972042 | H | -2.99981 | 0.85848  | 1.647721 |
| C | -1.43904 | -0.6121  | -0.31288 | H | -1.67519 | 1.819007 | 2.258059 |
| C | -2.02221 | 0.342193 | -1.36728 | H | -0.9438  | -0.48583 | 1.818341 |
| C | 0.799598 | 1.536294 | -2.07586 | H | -2.10334 | -1.45467 | -0.11347 |
| C | 1.32226  | 1.282125 | 1.472363 | H | -3.11553 | 0.346588 | -1.34977 |
| C | 2.616573 | 1.595183 | 0.703525 | H | -1.70517 | 0.027438 | -2.36245 |
| C | 3.130892 | 0.4594   | -0.22004 | H | 0.379658 | 2.251127 | -2.78533 |
| N | 2.183266 | -0.63299 | -0.6617  | H | 1.858419 | 1.764712 | -1.98257 |
| C | 0.89795  | -0.71048 | 0.021622 | H | 0.708735 | 0.535546 | -2.49021 |
| C | 2.86454  | -1.94594 | -0.42988 | H | 0.925611 | 2.202967 | 1.910219 |
| C | 2.211414 | -3.08455 | -1.19361 | H | 1.505593 | 0.593401 | 2.30193  |
| C | 1.119575 | -3.70381 | -0.71497 | H | 3.415083 | 1.842036 | 1.407698 |
| C | 0.564251 | -3.22531 | 0.534389 | H | 2.457347 | 2.497796 | 0.110849 |
| C | 1.149733 | -1.94902 | 1.095911 | H | 3.970581 | -0.01857 | 0.287444 |
| C | 2.663323 | -2.14465 | 1.085199 | H | 3.906927 | -1.85819 | -0.73123 |
| C | -0.30565 | -3.73635 | 1.422058 | H | 2.666094 | -3.39879 | -2.12709 |
| C | -0.30734 | -2.88607 | 2.615102 | H | 0.662943 | -4.54603 | -1.22355 |
| O | 0.578428 | -1.83614 | 2.399774 | H | 3.181545 | -1.38552 | 1.67214  |
| O | -0.90756 | -2.98288 | 3.655936 | H | 2.957299 | -3.12903 | 1.452146 |
| O | -0.18732 | -1.14272 | -0.83611 | H | -0.88181 | -4.64819 | 1.356814 |
| H | 0.298922 | 2.67498  | -0.34377 | H | 3.552094 | 0.902091 | -1.12564 |

**Suffruticosine, structure 29, conformer 2**

|   |          |          |          |   |          |          |          |
|---|----------|----------|----------|---|----------|----------|----------|
| C | 0.088154 | 1.663862 | -0.80808 | C | 0.872732 | -0.74486 | 0.005713 |
| C | 0.351324 | 0.649885 | 0.447792 | C | 2.878646 | -1.97261 | -0.34779 |
| C | -2.73788 | 3.431635 | -0.06473 | C | 2.275359 | -3.14351 | -1.10566 |
| C | -2.13953 | 2.263048 | 0.182691 | C | 1.164042 | -3.75377 | -0.6618  |
| C | -1.45564 | 1.765285 | -1.0494  | C | 0.557155 | -3.25028 | 0.552778 |
| O | -1.76037 | 2.759547 | -2.0454  | C | 1.109966 | -1.95715 | 1.111153 |
| C | -2.51087 | 3.76823  | -1.47761 | C | 2.62546  | -2.13459 | 1.160814 |
| O | -2.87445 | 4.71866  | -2.1263  | C | -0.34196 | -3.75234 | 1.416177 |
| C | -2.00646 | 1.336586 | 1.336702 | C | -0.39499 | -2.882   | 2.592543 |
| C | -1.0542  | 0.205986 | 0.932731 | O | 0.491985 | -1.82986 | 2.3918   |
| C | -1.46304 | -0.58729 | -0.3394  | O | -1.0321  | -2.96453 | 3.612372 |
| C | -2.01931 | 0.380163 | -1.39838 | O | -0.22317 | -1.16859 | -0.84284 |
| C | 0.756601 | 1.455581 | -2.19231 | H | 0.39022  | 2.64839  | -0.44186 |
| C | 1.285798 | 1.260059 | 1.490858 | H | -3.31191 | 4.06083  | 0.600805 |
| C | 2.770957 | 1.194276 | 1.03474  | H | -2.98494 | 0.928271 | 1.614062 |
| C | 2.998811 | 0.497984 | -0.32896 | H | -1.63509 | 1.851422 | 2.227871 |
| N | 2.167887 | -0.69992 | -0.66597 | H | -0.95363 | -0.45723 | 1.781682 |

|   |          |          |          |   |          |          |          |
|---|----------|----------|----------|---|----------|----------|----------|
| H | -2.15439 | -1.40651 | -0.13557 | H | 3.183056 | 2.202755 | 0.941623 |
| H | -3.11237 | 0.40383  | -1.38572 | H | 4.042517 | 0.188216 | -0.39499 |
| H | -1.70301 | 0.061187 | -2.39249 | H | 3.929473 | -1.86674 | -0.60994 |
| H | 0.074364 | 1.780152 | -2.97728 | H | 2.773315 | -3.47899 | -2.00923 |
| H | 1.647363 | 2.073865 | -2.29945 | H | 0.732838 | -4.61111 | -1.16736 |
| H | 1.026321 | 0.420646 | -2.38017 | H | 3.118534 | -1.35624 | 1.74114  |
| H | 0.994232 | 2.290356 | 1.707727 | H | 2.912483 | -3.1076  | 1.562665 |
| H | 1.166818 | 0.70655  | 2.425816 | H | -0.90731 | -4.67049 | 1.345419 |
| H | 3.363736 | 0.707046 | 1.811662 | H | 2.863166 | 1.230014 | -1.11814 |

### Suffruticosine, structure 30

|   |          |          |          |   |          |          |          |
|---|----------|----------|----------|---|----------|----------|----------|
| C | 0.067785 | 1.75695  | 0.694129 | C | 2.777175 | -2.47951 | -1.57332 |
| C | 0.228487 | 0.515001 | -0.35763 | C | 1.332894 | -2.49677 | -1.64768 |
| C | -2.50278 | 3.677199 | -0.47107 | C | 0.53715  | -2.28437 | -0.38299 |
| C | -2.05076 | 2.41997  | -0.47799 | C | 1.216792 | -3.08689 | 0.739345 |
| C | -1.45502 | 2.081766 | 0.850023 | C | 0.500566 | -2.92072 | -2.62111 |
| O | -1.65031 | 3.271879 | 1.636349 | C | -0.83073 | -3.10155 | -2.04858 |
| C | -2.25887 | 4.240276 | 0.865095 | O | -0.77122 | -2.74758 | -0.71003 |
| O | -2.51252 | 5.330988 | 1.314974 | O | -1.85856 | -3.50352 | -2.53847 |
| C | -2.01755 | 1.284014 | -1.43581 | O | -0.55164 | -0.92221 | 1.258676 |
| C | -1.20578 | 0.148635 | -0.80082 | H | 0.495605 | 2.620289 | 0.178512 |
| C | -1.71845 | -0.34515 | 0.589809 | H | -2.98401 | 4.235779 | -1.26149 |
| C | -2.19197 | 0.860296 | 1.417941 | H | -3.03512 | 0.944659 | -1.66075 |
| H | 0.609867 | -3.07889 | 1.643699 | H | -1.58147 | 1.576582 | -2.39569 |
| C | 0.678135 | 1.712698 | 2.120649 | H | -1.18041 | -0.66956 | -1.51118 |
| H | 1.430538 | -4.11401 | 0.444955 | H | -2.47932 | -1.1207  | 0.513542 |
| C | 1.252836 | 0.84282  | -1.43889 | H | -3.27348 | 1.001835 | 1.342059 |
| H | 3.840289 | -0.16702 | 0.670333 | H | -1.94815 | 0.702419 | 2.469303 |
| C | 2.696691 | 0.84587  | -0.86716 | H | 1.602198 | 2.288134 | 2.172557 |
| H | 2.761455 | 1.032286 | 1.289414 | H | -0.00447 | 2.18395  | 2.827159 |
| C | 2.834325 | 0.238763 | 0.553982 | H | 0.870488 | 0.702181 | 2.468921 |
| H | 3.076871 | 1.869702 | -0.81441 | H | 1.024992 | 1.805696 | -1.90306 |
| N | 1.891537 | -0.84481 | 0.927083 | H | 1.173531 | 0.099327 | -2.23633 |
| H | 3.350413 | 0.313733 | -1.55968 | H | 3.036432 | -2.41713 | 1.789204 |
| C | 0.575894 | -0.82806 | 0.337831 | H | 4.422058 | -2.48319 | -0.24098 |
| C | 2.471647 | -2.21974 | 0.877209 | H | 3.361275 | -2.62069 | -2.47633 |
| C | 3.345499 | -2.41249 | -0.35599 | H | 0.745164 | -3.19715 | -3.63671 |

**Suffruticosine, structure 31**

|   |          |          |          |   |          |          |          |
|---|----------|----------|----------|---|----------|----------|----------|
| C | 0.015632 | 1.73898  | 0.790632 | C | 0.838341 | -2.86906 | -2.55241 |
| C | 0.197347 | 0.554782 | -0.30793 | C | -0.56429 | -3.02253 | -2.17449 |
| C | -2.60628 | 3.708701 | -0.23957 | O | -0.68616 | -2.67948 | -0.83811 |
| C | -2.09509 | 2.479376 | -0.34887 | O | -1.52092 | -3.39799 | -2.80855 |
| C | -1.51211 | 2.055864 | 0.962398 | O | -0.68508 | -0.9393  | 1.227598 |
| O | -1.73961 | 3.17219  | 1.837423 | H | 0.350253 | 1.363481 | 1.758339 |
| C | -2.39218 | 4.171605 | 1.141756 | H | -3.1166  | 4.30773  | -0.98067 |
| O | -2.69794 | 5.209154 | 1.676078 | H | -3.00407 | 1.109821 | -1.71217 |
| C | -2.00308 | 1.42263  | -1.39554 | H | -1.50829 | 1.796936 | -2.29735 |
| C | -1.22567 | 0.229109 | -0.81569 | H | -1.19534 | -0.55201 | -1.56919 |
| C | -1.8058  | -0.33308 | 0.525932 | H | -2.56765 | -1.09615 | 0.368505 |
| C | -2.28983 | 0.816393 | 1.415755 | H | -3.36429 | 0.994173 | 1.317376 |
| H | 0.37764  | -3.04304 | 1.688634 | H | -2.07818 | 0.579332 | 2.459854 |
| C | 0.760484 | 3.050593 | 0.496445 | H | 0.444479 | 3.511579 | -0.44135 |
| H | 1.361182 | -4.06618 | 0.60782  | H | 1.838836 | 2.923078 | 0.454717 |
| C | 1.308375 | 0.852893 | -1.31489 | H | 0.559871 | 3.764804 | 1.295825 |
| C | 2.70863  | 0.782366 | -0.63236 | H | 1.161035 | 1.823481 | -1.79036 |
| C | 2.675645 | 0.309443 | 0.844245 | H | 1.25399  | 0.117511 | -2.12085 |
| N | 1.734264 | -0.7907  | 1.15122  | H | 3.352746 | 0.118736 | -1.20721 |
| C | 0.497876 | -0.79749 | 0.408492 | H | 3.19447  | 1.760885 | -0.65621 |
| C | 2.321953 | -2.16548 | 1.180559 | H | 3.672092 | -0.02766 | 1.1356   |
| C | 3.354011 | -2.37447 | 0.080752 | H | 2.755858 | -2.36039 | 2.162077 |
| C | 2.953792 | -2.46088 | -1.20018 | H | 4.404734 | -2.44766 | 0.341535 |
| C | 1.532646 | -2.45583 | -1.47231 | H | 3.652679 | -2.61956 | -2.0145  |
| C | 0.570142 | -2.23634 | -0.32871 | H | 1.218302 | -3.15075 | -3.52397 |
| C | 1.098523 | -3.04268 | 0.873306 | H | 2.453649 | 1.151071 | 1.501553 |

**Suffruticosine, structure 32**

|   |          |          |          |   |          |          |          |
|---|----------|----------|----------|---|----------|----------|----------|
| C | 0.730089 | 0.402164 | -1.06741 | C | 3.628866 | 1.922438 | -1.45933 |
| C | -0.81366 | -0.10787 | -0.93468 | O | 1.130469 | 1.432207 | 1.193124 |
| C | -1.68196 | 0.619794 | -1.98581 | C | 3.413941 | 1.290645 | 0.978672 |
| C | -1.23159 | 0.432273 | -3.44467 | C | 2.296643 | 1.228063 | 1.910885 |
| C | 0.310974 | 0.40791  | -3.55468 | O | 2.261613 | 1.064705 | 3.106303 |
| N | 0.959526 | 0.952551 | -2.37874 | O | 1.513607 | -0.78932 | -0.81365 |
| C | 1.401998 | 1.550562 | -0.19422 | C | -0.59455 | -1.63546 | -1.25816 |
| C | 1.380932 | 2.364578 | -2.34001 | C | -1.58849 | -0.09915 | 0.443601 |
| C | 0.961561 | 2.822293 | -0.92203 | C | -1.21155 | -1.40528 | 1.216901 |
| C | 2.934161 | 1.517372 | -0.2569  | C | -1.74672 | -2.5937  | -0.90598 |
| C | 2.895508 | 2.412018 | -2.47193 | C | -2.00616 | -2.49443 | 0.561506 |

|   |          |          |          |   |          |          |          |
|---|----------|----------|----------|---|----------|----------|----------|
| C | 0.277404 | -1.78187 | 1.101436 | H | -0.11375 | 2.988477 | -0.85599 |
| O | -1.65235 | -1.41058 | 2.583571 | H | 3.352222 | 2.79687  | -3.37793 |
| C | -2.58724 | -2.41207 | 2.758389 | H | 4.71312  | 1.897477 | -1.47835 |
| C | -2.79697 | -3.08168 | 1.463381 | H | 4.445656 | 1.242779 | 1.29615  |
| O | -3.09237 | -2.6158  | 3.83496  | H | -0.32957 | -1.77851 | -2.30389 |
| C | 0.655713 | -1.85813 | -0.40552 | H | -2.62082 | -0.26912 | 0.120058 |
| C | -1.69613 | 1.163776 | 1.309779 | H | -1.47976 | -3.61579 | -1.19269 |
| H | -2.71779 | 0.282755 | -1.88929 | H | -2.65174 | -2.35189 | -1.47303 |
| H | -1.70043 | 1.686721 | -1.74492 | H | 0.430562 | -2.74621 | 1.592324 |
| H | -1.64785 | 1.244255 | -4.04734 | H | 0.900985 | -1.05226 | 1.614794 |
| H | -1.64456 | -0.49443 | -3.855   | H | -3.50533 | -3.88782 | 1.334164 |
| H | 0.653256 | 0.978902 | -4.41942 | H | 1.185952 | -2.78268 | -0.63588 |
| H | 0.669046 | -0.61322 | -3.71868 | H | -0.85645 | 1.306794 | 1.977593 |
| H | 0.889191 | 2.938733 | -3.12541 | H | -1.7893  | 2.055977 | 0.685309 |
| H | 1.485343 | 3.7153   | -0.58036 | H | -2.60525 | 1.097858 | 1.910973 |

**Suffruticosine, structure 33**

|   |          |          |          |   |          |          |          |
|---|----------|----------|----------|---|----------|----------|----------|
| C | 0.31486  | 0.29288  | -1.10477 | C | -3.15067 | -3.09823 | 2.037214 |
| C | -1.2187  | -0.20228 | -1.0881  | C | -3.4036  | -3.43276 | 0.62524  |
| C | -2.06678 | 0.729919 | -1.97585 | O | -3.68376 | -3.49877 | 3.043125 |
| C | -1.60115 | 0.798685 | -3.44244 | C | 0.192509 | -2.07135 | -0.91758 |
| C | -0.05922 | 0.742775 | -3.56297 | C | -3.27383 | 0.081627 | 0.561885 |
| N | 0.61011  | 1.031103 | -2.30852 | H | -3.11132 | 0.416014 | -1.95634 |
| C | 0.941092 | 1.2955   | -0.02078 | H | -2.057   | 1.7347   | -1.54452 |
| C | 1.155874 | 2.370535 | -2.03718 | H | -1.9846  | 1.722711 | -3.88385 |
| C | 0.642079 | 2.672112 | -0.61373 | H | -2.04272 | -0.01942 | -4.01986 |
| C | 2.46137  | 1.168383 | 0.065474 | H | 0.263158 | -0.23691 | -3.93079 |
| C | 2.675427 | 2.28223  | -2.03768 | H | 0.299603 | 1.461214 | -4.30148 |
| C | 3.283019 | 1.634708 | -1.02923 | H | 0.797256 | 3.087578 | -2.77511 |
| O | 0.513217 | 1.069685 | 1.318546 | H | 1.18184  | 3.474415 | -0.10929 |
| C | 2.795723 | 0.78326  | 1.309767 | H | -0.4247  | 2.898838 | -0.61386 |
| C | 1.586083 | 0.705773 | 2.120168 | H | 3.23795  | 2.702855 | -2.86499 |
| O | 1.419193 | 0.427423 | 3.281606 | H | 4.359856 | 1.515619 | -0.97552 |
| O | 1.071211 | -0.94266 | -1.00405 | H | 3.783855 | 0.6294   | 1.718971 |
| C | -1.03856 | -1.62874 | -1.71473 | H | -0.76686 | -1.56313 | -2.76572 |
| C | -1.82879 | -0.4005  | 0.368773 | H | -1.22792 | 0.153624 | 1.079137 |
| C | -1.66992 | -1.90022 | 0.751344 | H | -2.03088 | -3.53525 | -2.04499 |
| C | -2.24847 | -2.56918 | -1.57776 | H | -3.11706 | -2.16888 | -2.11128 |
| C | -2.54914 | -2.73281 | -0.12621 | H | -0.16236 | -3.4448  | 0.758533 |
| C | -0.21904 | -2.37419 | 0.546261 | H | 0.453889 | -1.86498 | 1.23774  |
| O | -2.12481 | -2.17574 | 2.087402 | H | -4.16777 | -4.13497 | 0.322585 |

|   |          |          |          |   |          |          |          |
|---|----------|----------|----------|---|----------|----------|----------|
| H | 0.723951 | -2.91297 | -1.3631  | H | -3.35351 | 1.155094 | 0.384352 |
| H | -3.57705 | -0.09518 | 1.595837 | H | -3.99793 | -0.41976 | -0.08369 |



## 14. References

1. G. W. T. M. J. Frisch, H. B. Schlegel, G. E. Scuseria, M. A. Robb, J. R. Cheeseman, G. Scalmani, V. Barone, B. Mennucci, G. A. Petersson, H. Nakatsuji, M. Caricato, X. Li, H. P. Hratchian, A. F. Izmaylov, J. Bloino, G. Zheng, J. L. Sonnenberg, M. Hada, M. Ehara, K. Toyota, R. Fukuda, J. Hasegawa, M. Ishida, T. Nakajima, Y. Honda, O. Kitao, H. Nakai, T. Vreven, J. A. Montgomery, Jr., J. E. Peralta, F. Ogliaro, M. Bearpark, J. J. Heyd, E. Brothers, K. N. Kudin, V. N. Staroverov, T. Keith, R. Kobayashi, J. Normand, K. Raghavachari, A. Rendell, J. C. Burant, S. S. Iyengar, J. Tomasi, M. Cossi, N. Rega, J. M. Millam, M. Klene, J. E. Knox, J. B. Cross, V. Bakken, C. Adamo, J. Jaramillo, R. Gomperts, R. E. Stratmann, O. Yazyev, A. J. Austin, R. Cammi, C. Pomelli, J. W. Ochterski, R. L. Martin, K. Morokuma, V. G. Zakrzewski, G. A. Voth, P. Salvador, J. J. Dannenberg, S. Dapprich, A. D. Daniels, O. Farkas, J. B. Foresman, J. V. Ortiz, J. Cioslowski, and D. J. Fox, Gaussian, Inc., Wallingford CT, Gaussian 09, Revision D.01, 2013.
2. A. D. Becke, Density-functional exchange-energy approximation with correct asymptotic behavior, *Phys. Rev. A*, 1988, **38**, 3098-3100.
3. C. Lee, W. Yang and R. G. Parr, Development of the Colle-Salvetti correlation-energy formula into a functional of the electron density, *Phys. Rev. B*, 1988, **37**, 785-789.
4. M. M. Francl, W. J. Pietro, W. J. Hehre, J. S. Binkley, M. S. Gordon, D. J. DeFrees and J. A. Pople, Self-consistent molecular orbital methods. XXIII. A polarization-type basis set for second-row elements, *J. Chem. Phys.*, 1982, **77**, 3654-3665.
5. R. Krishnan, J. S. Binkley, R. Seeger and J. A. Pople, Self-consistent molecular orbital methods. XX. A basis set for correlated wave functions, *J. Chem. Phys.*, 1980, **72**, 650-654.
6. A. McLean and G. Chandler, Contracted Gaussian basis sets for molecular calculations. I. Second row atoms, Z= 11-18, *J. Chem. Phys.*, 1980, **72**, 5639-5648.
7. V. Barone and M. Cossi, Quantum calculation of molecular energies and energy gradients in solution by a conductor solvent model, *J. Phys. Chem. A*, 1998, **102**, 1995-2001.
8. M. M. Zanardi and A. M. Sarotti, Sensitivity Analysis of DP4+ with the Probability Distribution Terms: Development of a Universal and Customizable Method, *J. Org. Chem.*, 2021, **86**, 8544-8548.
9. A. L. Tenderholt, QMForge 2.4, 2018.
10. W. C. Still, M. Kahn and A. Mitra, Rapid chromatographic technique for preparative separations with moderate resolution, *J. Org. Chem.*, 1978, **43**, 2923-2925.
11. A. B. Pangborn, M. A. Giardello, R. H. Grubbs, R. K. Rosen and F. J. Timmers, Safe and Convenient Procedure for Solvent Purification, *Organometallics*, 1996, **15**, 1518-1520.
12. S. Qin, J.-Y. Liang, Y.-C. Gu and Y.-W. Guo, Suffruticosine, a novel octacyclic alkaloid with an unprecedented skeleton from *Securinega suffruticosa* (Pall.) Rehd, *Tetrahedron Lett.*, 2008, **49**, 7066-7069.
13. Z.-i. Horii, M. Ikeda, Y. Tamura, S. Saito, M. Suzuki and K. Kodera, Optical Rotatory Dispersion and Circular Dichroism of Securinine and Allosecurinine, *Chem. Pharm. Bull.*, 1964, **12**, 1118-1121.
14. J. Masse and N. Langlois, Synthesis of 5-amino and 4-hydroxy-2-phenylsulfonylmethylpiperidines, *Heterocycles*, 2009, **77**, 417-432.

## 15. Copies of NMR spectra of newly synthesized compounds

7.04  
7.03  
7.03  
7.02  
7.02  
7.01  
7.01  
7.00  
7.00  
6.99  
6.98

3.66  
3.66  
3.65  
3.64

2.44  
2.43  
2.43  
2.42  
2.42  
2.41  
2.41  
2.40  
1.86  
1.85  
1.84  
1.84  
1.83  
1.83  
1.82  
1.81  
1.81  
1.74  
1.73  
1.73  
1.72  
1.72  
1.72  
1.50

| Parameter              | Value                                            |
|------------------------|--------------------------------------------------|
| Origin                 | Bruker BioSpin GmbH                              |
| Instrument             | Avance                                           |
| Solvent                | CDCl3                                            |
| Temperature            | 298.0                                            |
| Experiment             | 1D                                               |
| Probe                  | Z151574_0070 (PI HR-BBO500S1-BBF/ H/ D-5.0-Z SP) |
| Number of Scans        | 16                                               |
| Spectrometer Frequency | 500.23                                           |
| Nucleus                | 1H                                               |

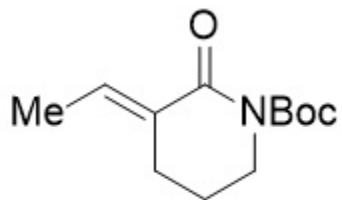

**16**

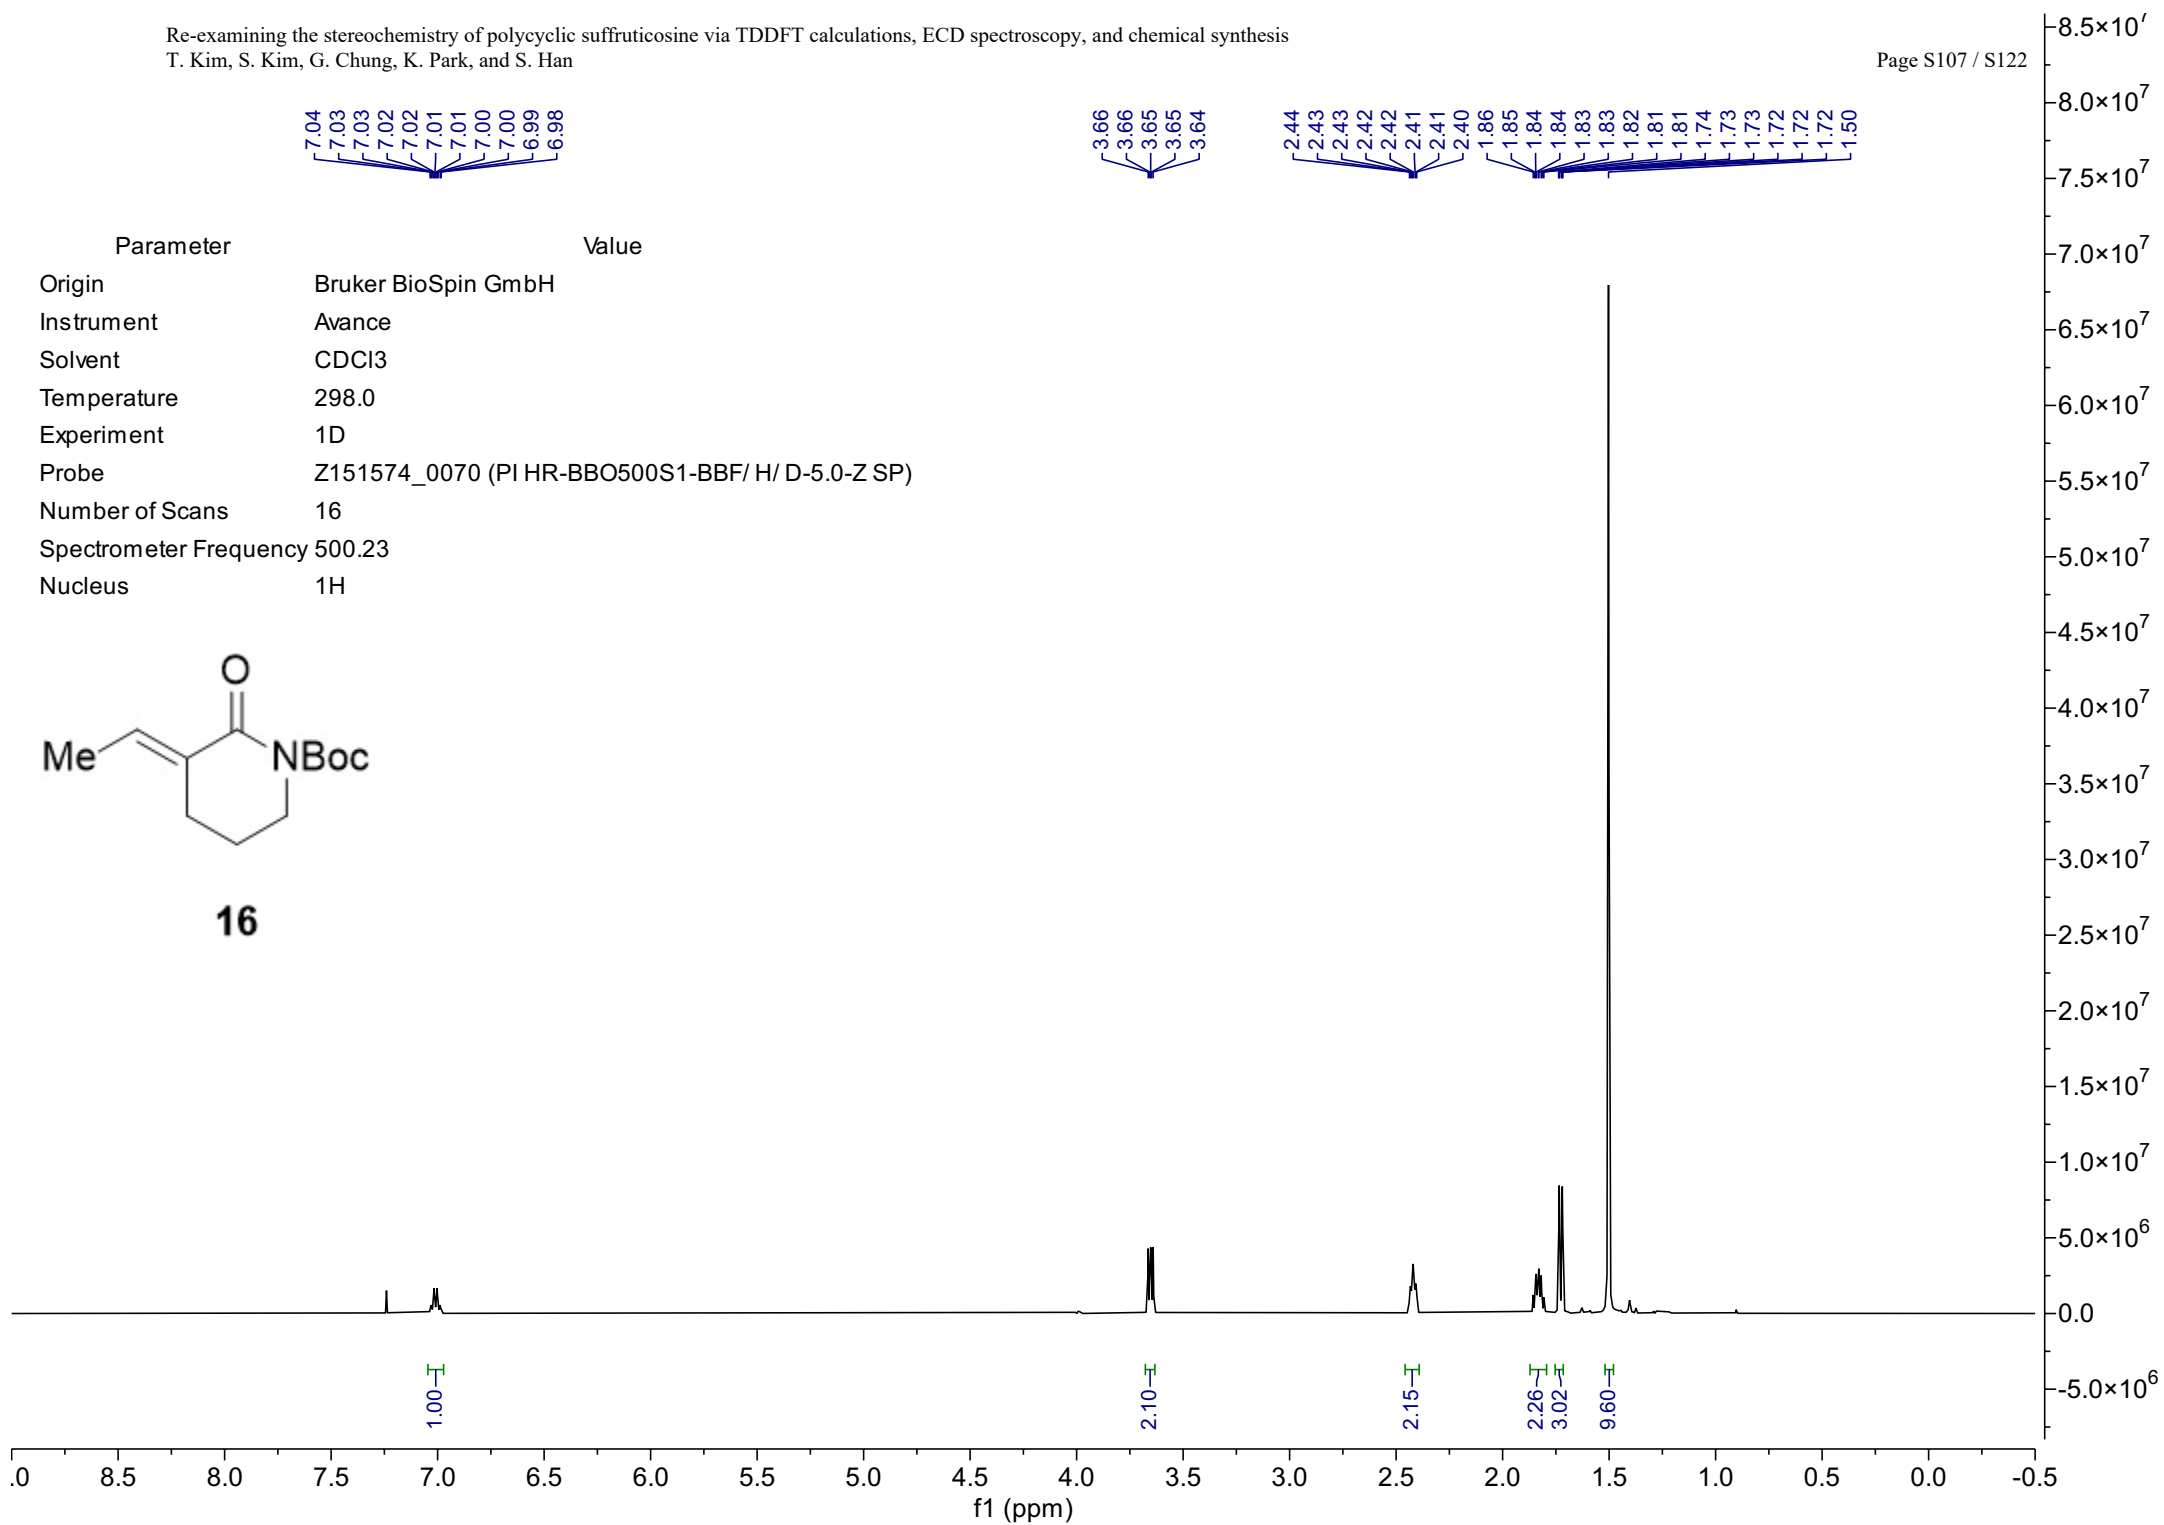

| Parameter              | Value                                            |
|------------------------|--------------------------------------------------|
| Origin                 | Bruker BioSpin GmbH                              |
| Instrument             | Avance                                           |
| Solvent                | CDCl <sub>3</sub>                                |
| Temperature            | 298.1                                            |
| Experiment             | 1D                                               |
| Probe                  | Z151574_0070 (PI HR-BBO500S1-BBF/ H/ D-5.0-Z SP) |
| Number of Scans        | 93                                               |
| Spectrometer Frequency | 125.80                                           |
| Nucleus                | <sup>13</sup> C                                  |

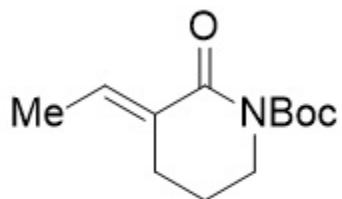

**16**

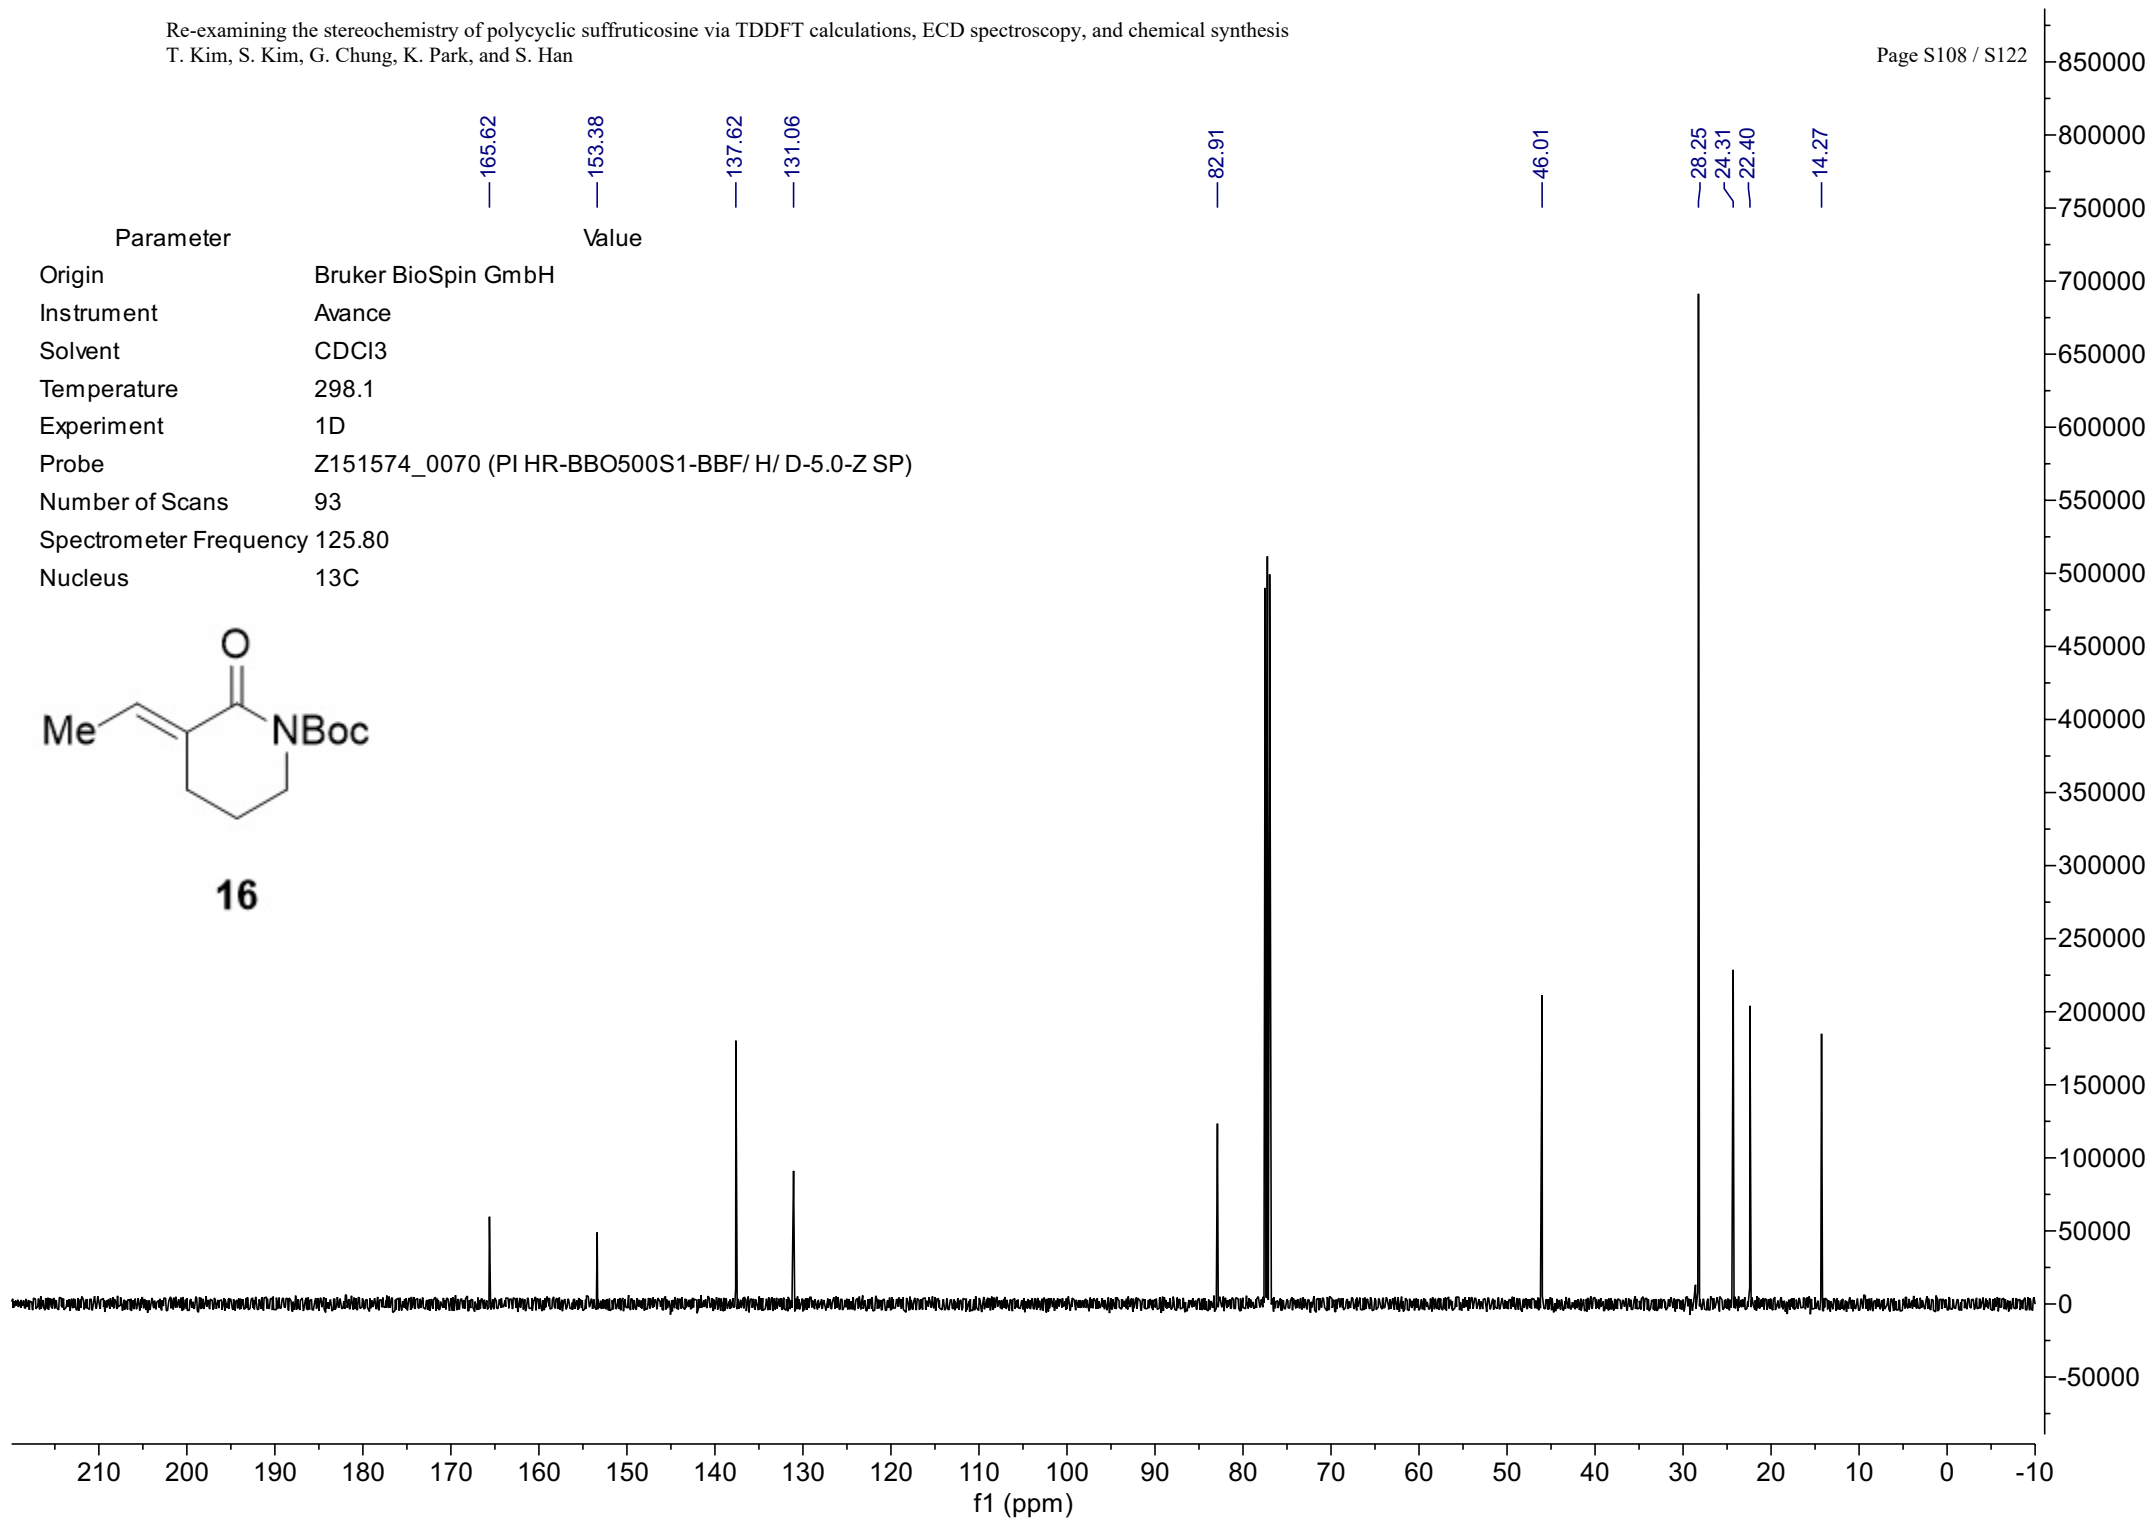

| Parameter              | Value                                            |
|------------------------|--------------------------------------------------|
| Origin                 | Bruker BioSpin GmbH                              |
| Instrument             | Avance                                           |
| Solvent                | CDCl <sub>3</sub>                                |
| Temperature            | 298.0                                            |
| Experiment             | 1D                                               |
| Probe                  | Z151574_0070 (PI HR-BBO500S1-BBF/ H/ D-5.0-Z SP) |
| Number of Scans        | 7                                                |
| Spectrometer Frequency | 500.23                                           |
| Nucleus                | <sup>1</sup> H                                   |

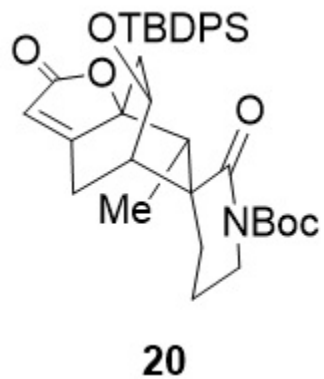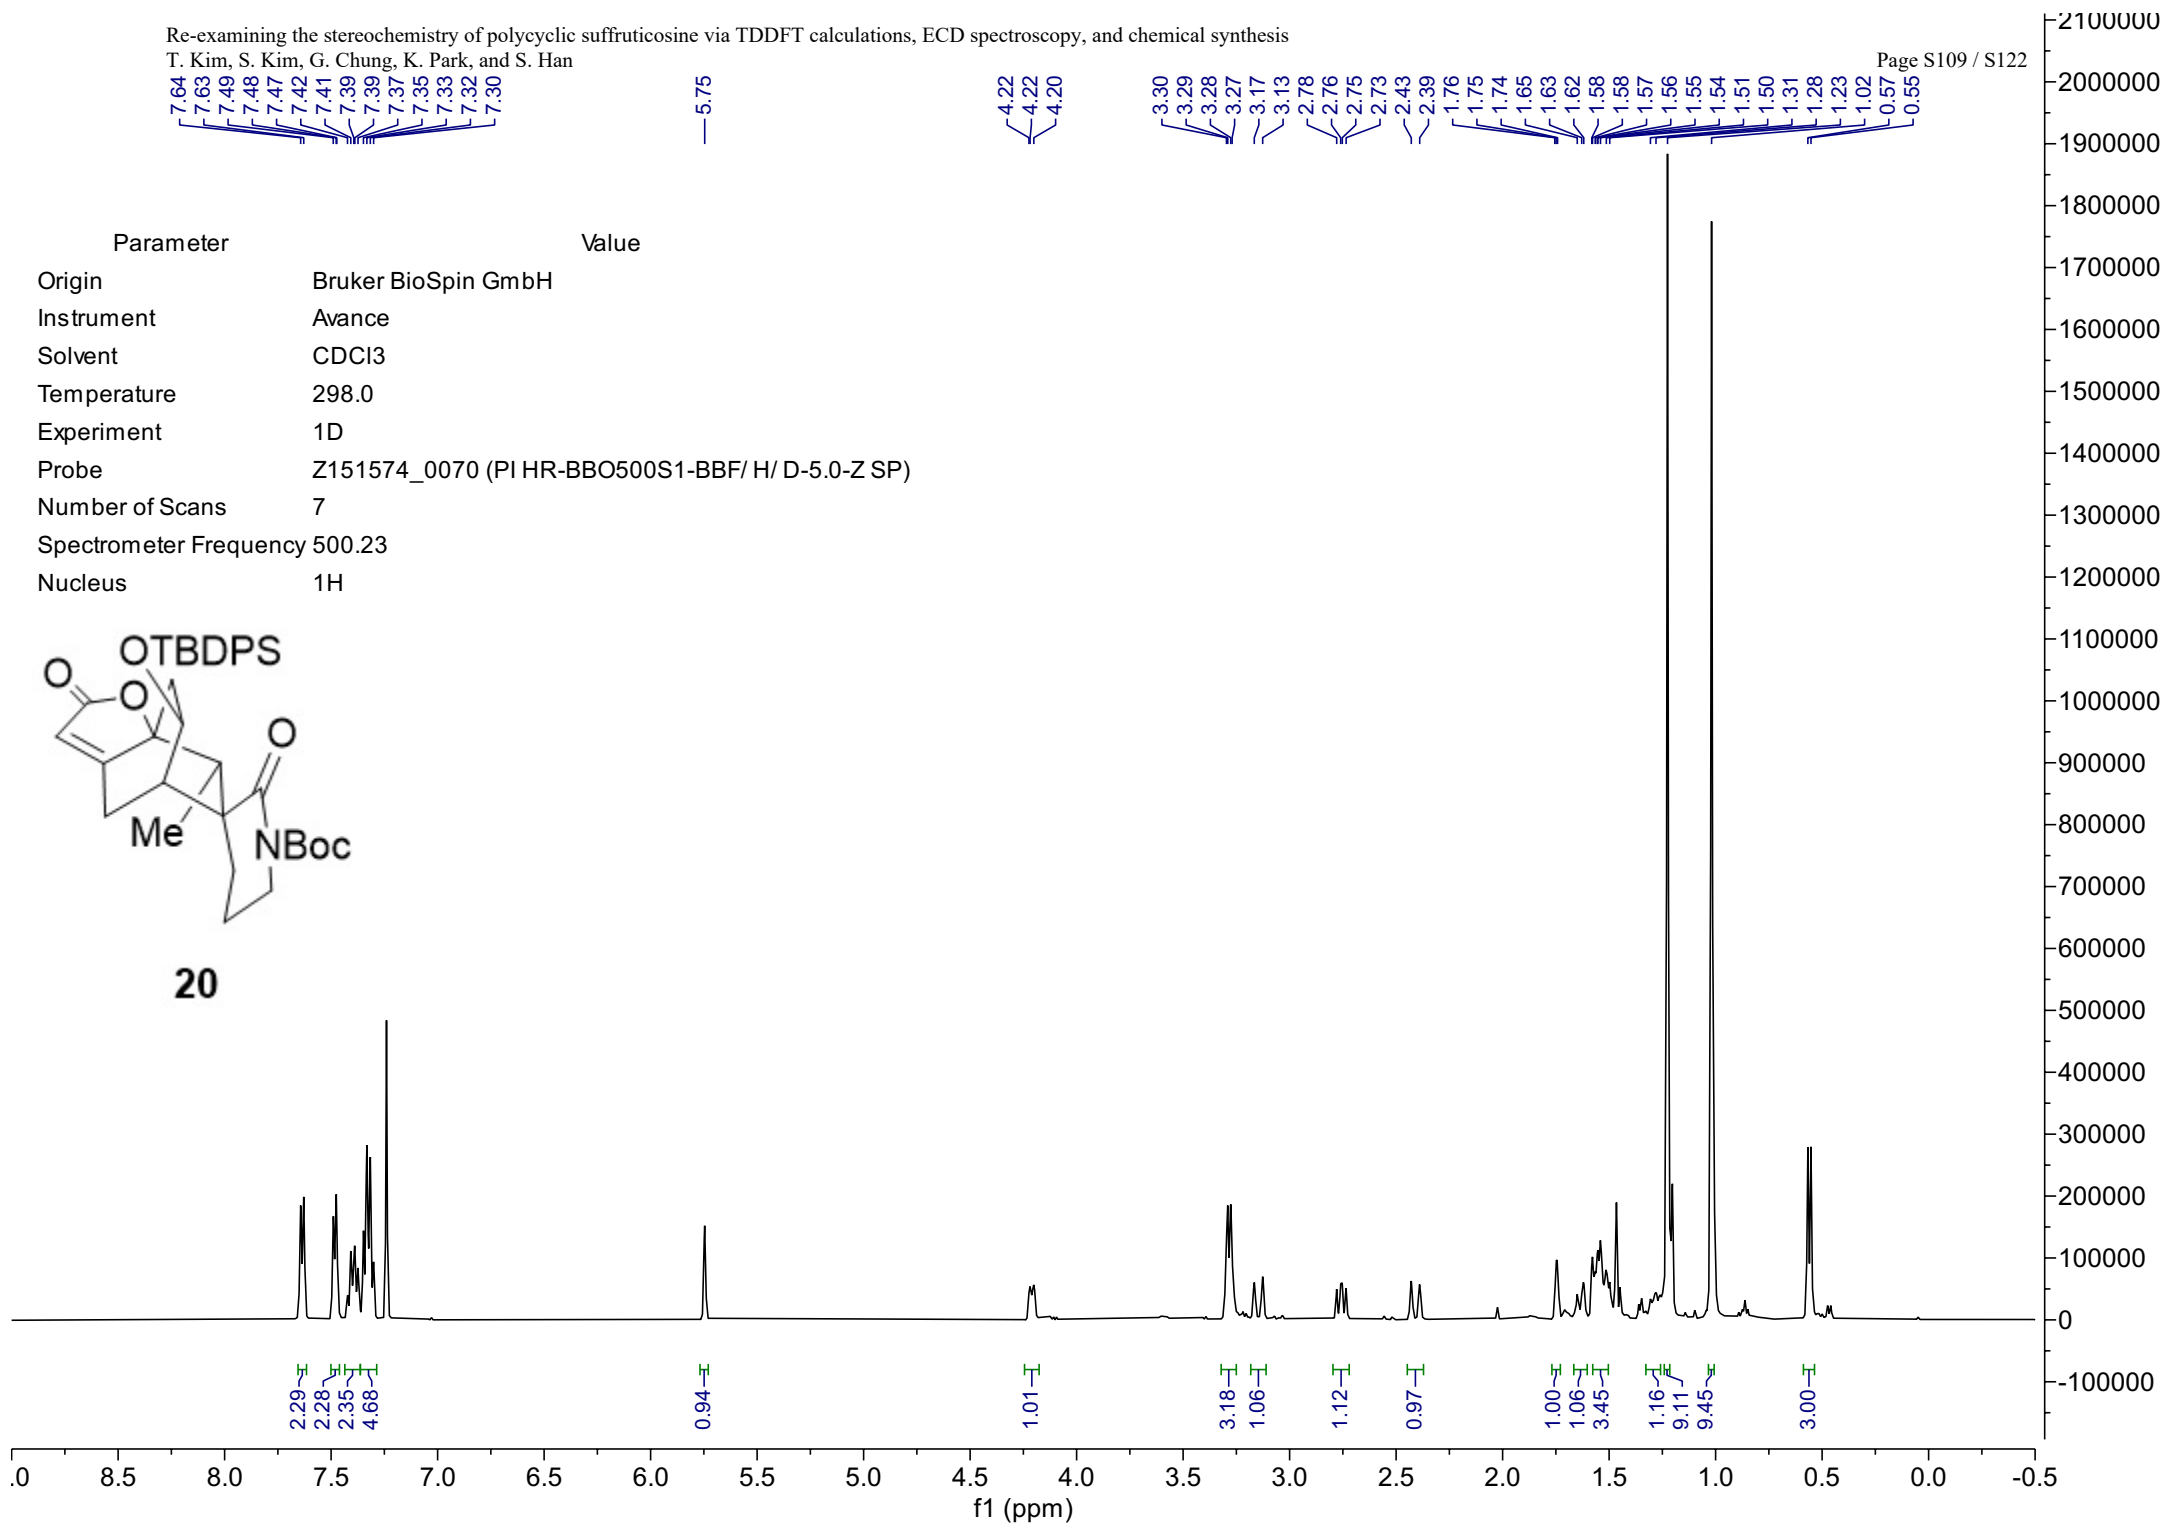

| Parameter              | Value                                            |
|------------------------|--------------------------------------------------|
| Origin                 | Bruker BioSpin GmbH                              |
| Instrument             | Avance                                           |
| Solvent                | CDCl <sub>3</sub>                                |
| Temperature            | 298.0                                            |
| Experiment             | 1D                                               |
| Probe                  | Z151574_0070 (PI HR-BBO500S1-BBF/ H/ D-5.0-Z SP) |
| Number of Scans        | 7000                                             |
| Spectrometer Frequency | 125.80                                           |
| Nucleus                | <sup>13</sup> C                                  |

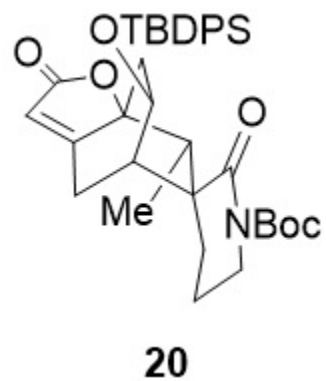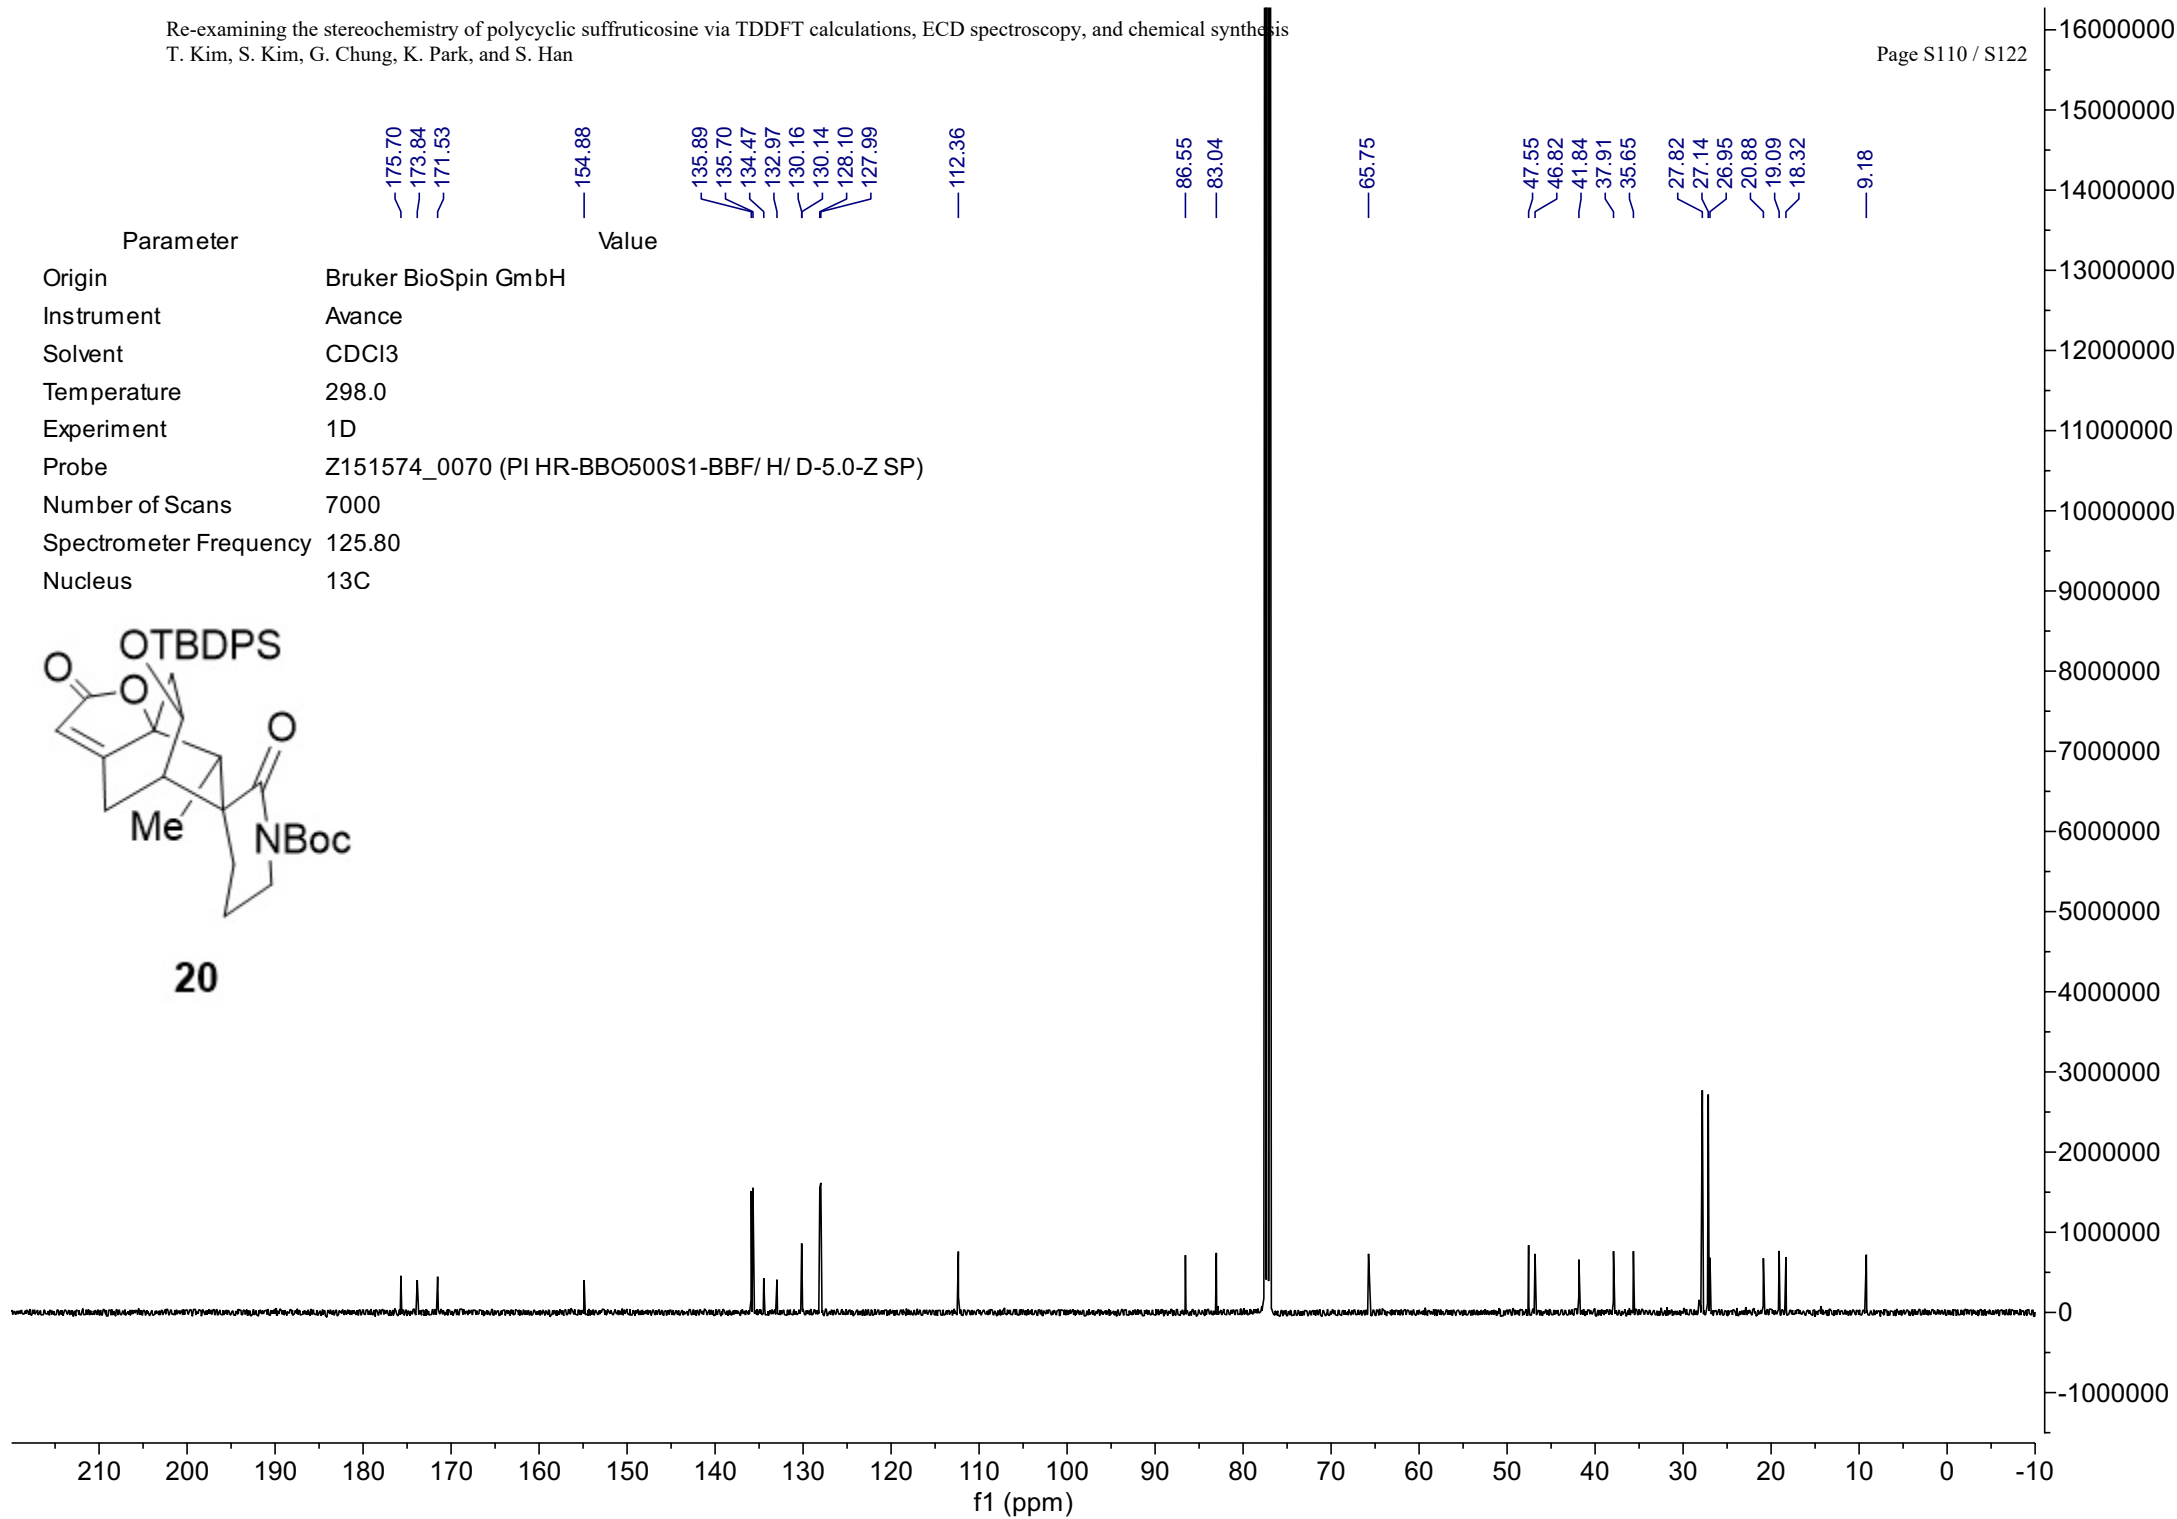

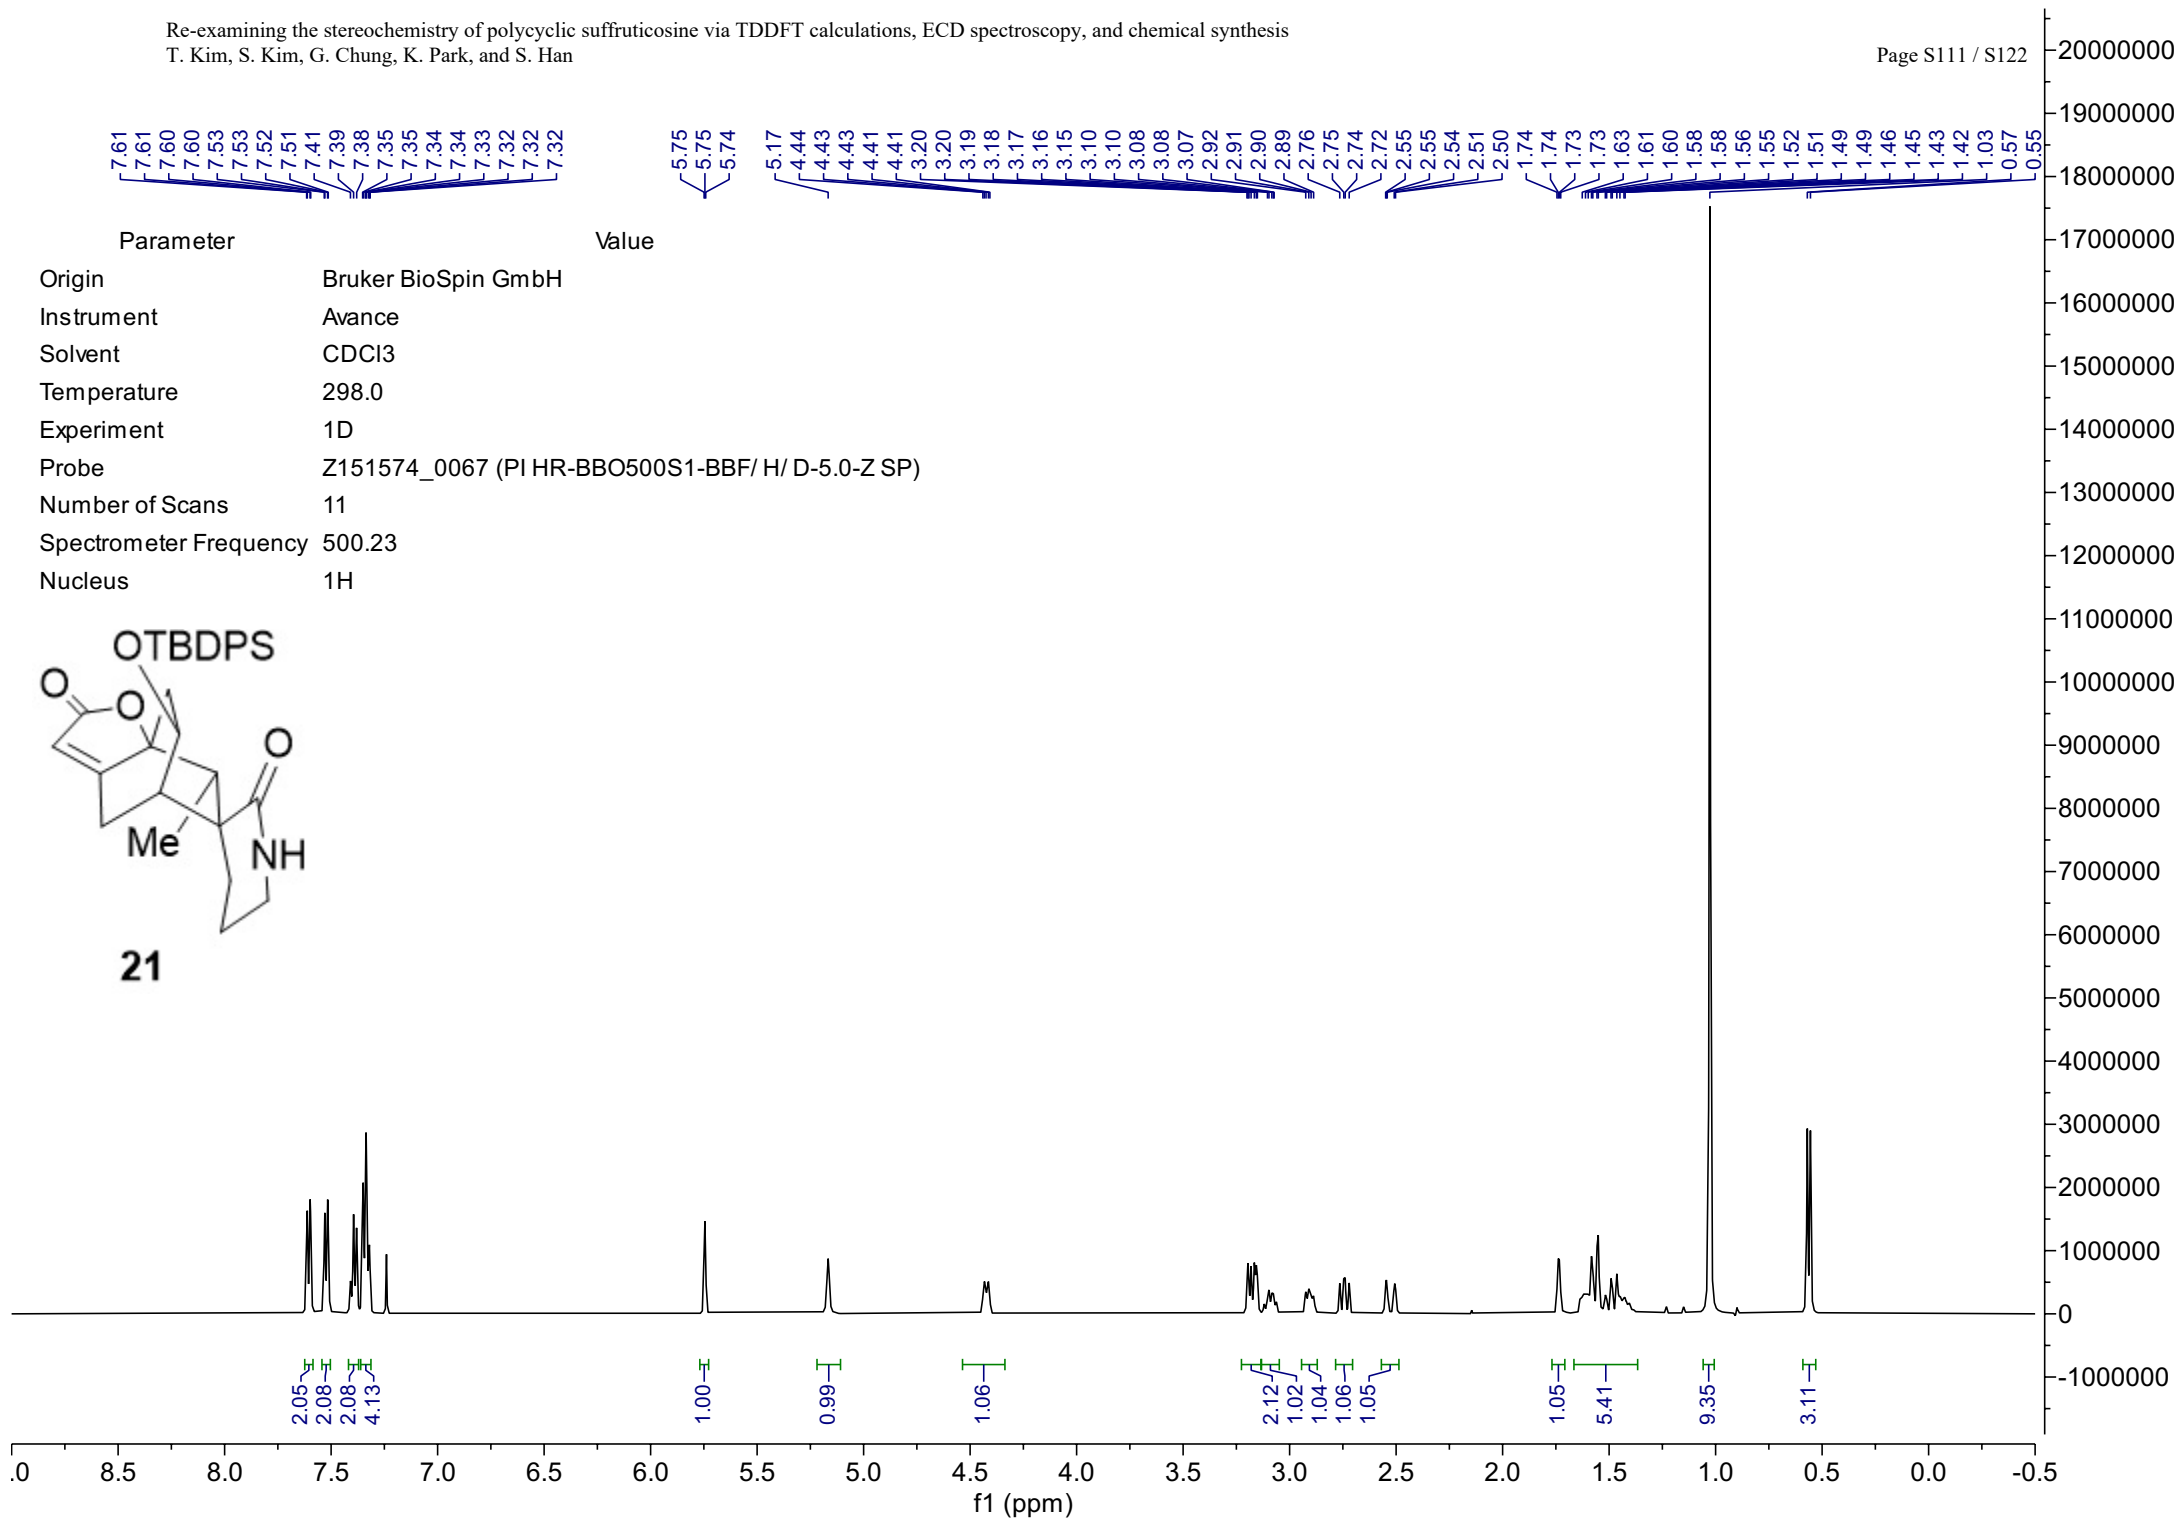

| Parameter              | Value                                            |
|------------------------|--------------------------------------------------|
| Origin                 | Bruker BioSpin GmbH                              |
| Instrument             | Avance                                           |
| Solvent                | CDCl <sub>3</sub>                                |
| Temperature            | 298.0                                            |
| Experiment             | 1D                                               |
| Probe                  | Z151574_0067 (PI HR-BBO500S1-BBF/ H/ D-5.0-Z SP) |
| Number of Scans        | 4352                                             |
| Spectrometer Frequency | 125.80                                           |
| Nucleus                | <sup>13</sup> C                                  |

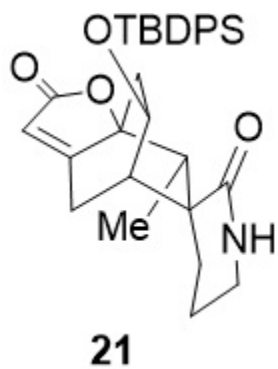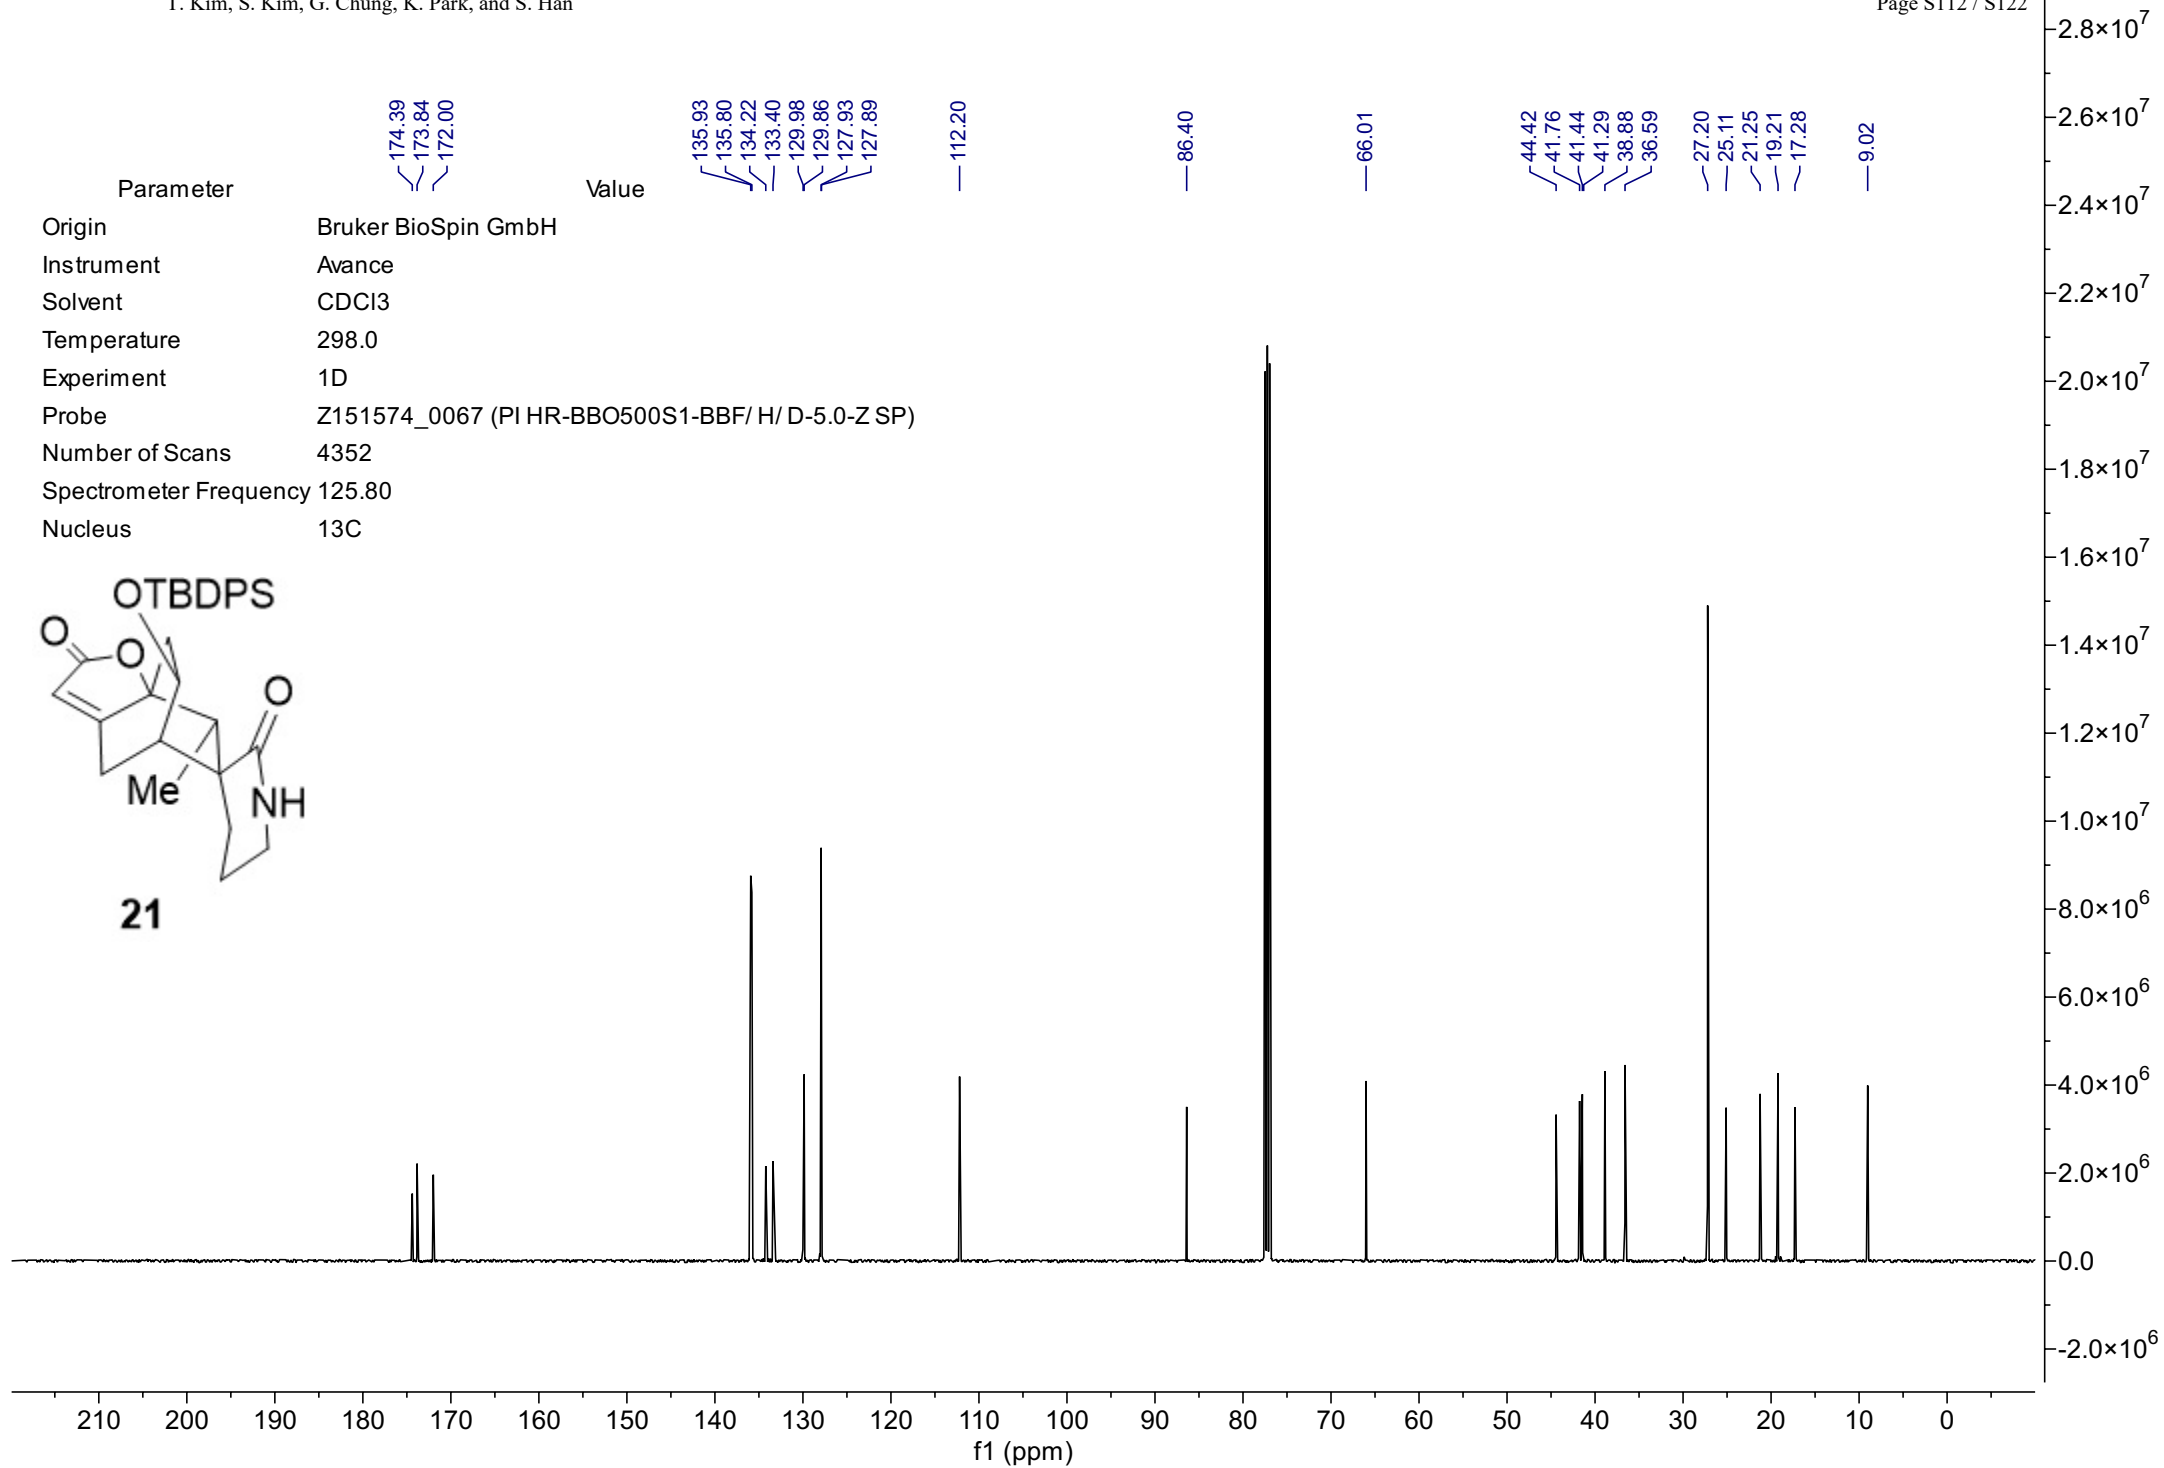



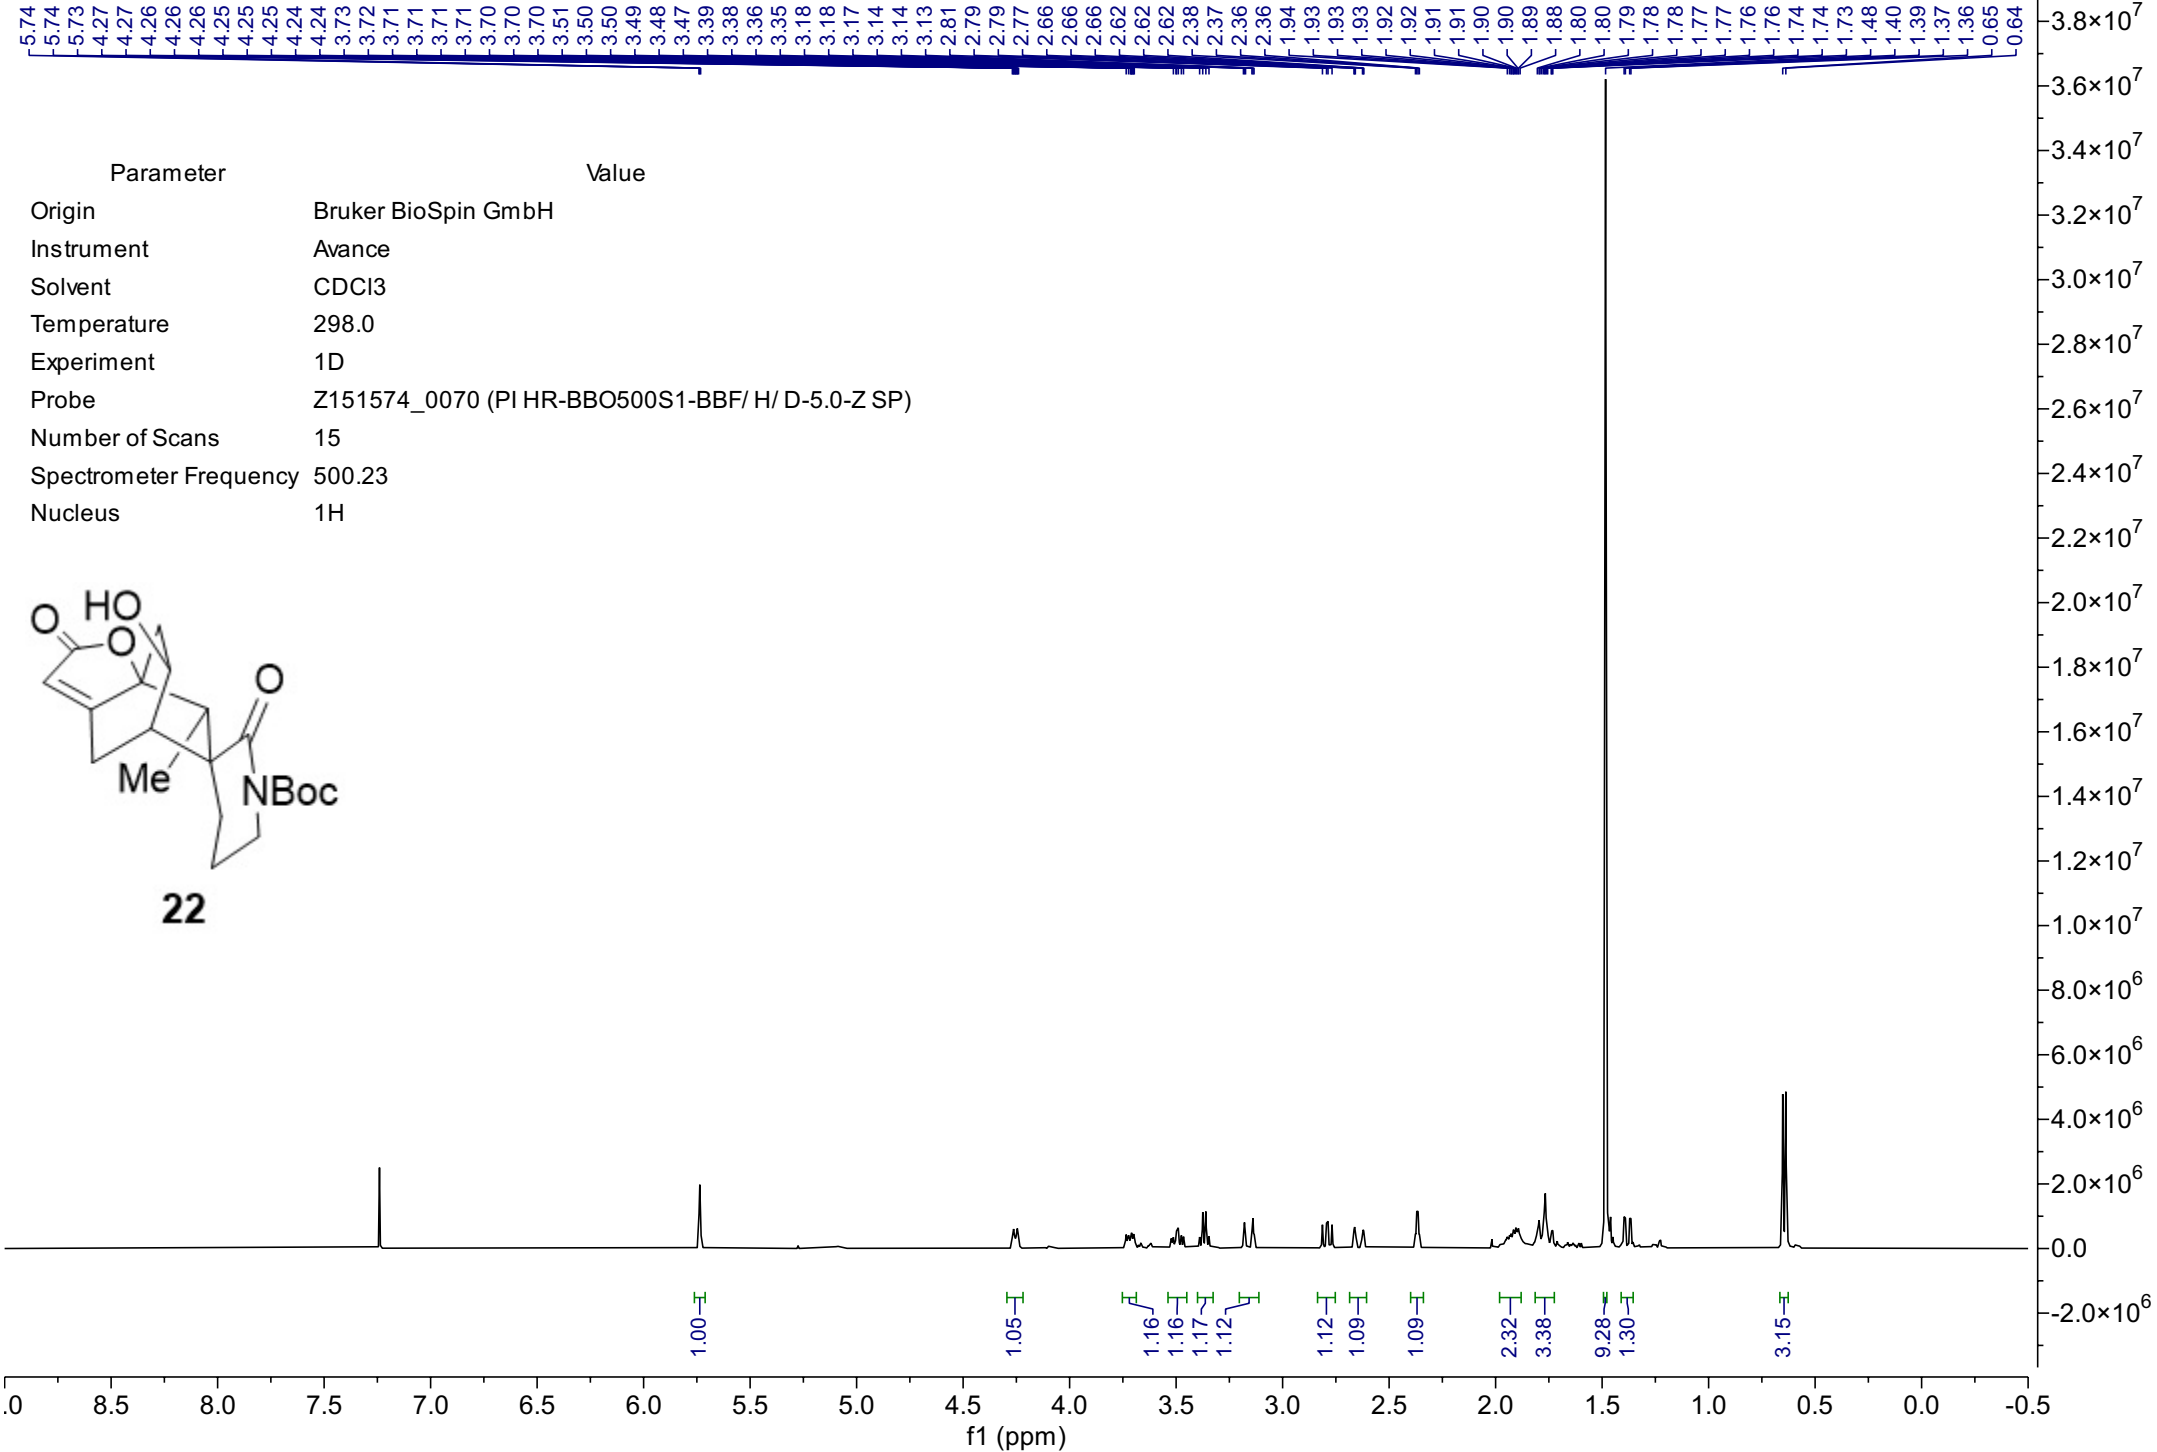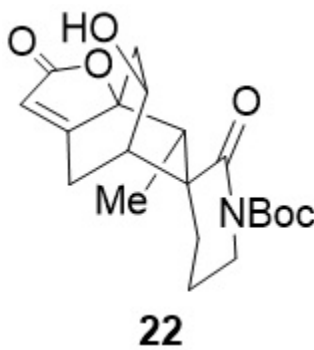

22

176.02  
173.65  
171.27

154.10

112.51

86.17  
83.29

64.30

48.18  
47.31

41.09  
39.37  
36.22

28.16  
26.95

20.93  
18.94

9.20

| Parameter              | Value                                          |
|------------------------|------------------------------------------------|
| Origin                 | Bruker BioSpin GmbH                            |
| Instrument             | Avance                                         |
| Solvent                | CDCl <sub>3</sub>                              |
| Temperature            | 298.1                                          |
| Experiment             | 1D                                             |
| Probe                  | Z151574_0070 (PI HR-BBO500S1-BBF/H/D-5.0-Z SP) |
| Number of Scans        | 436                                            |
| Spectrometer Frequency | 125.80                                         |
| Nucleus                | <sup>13</sup> C                                |

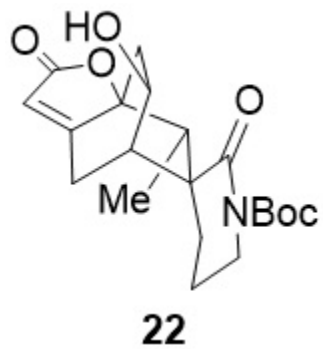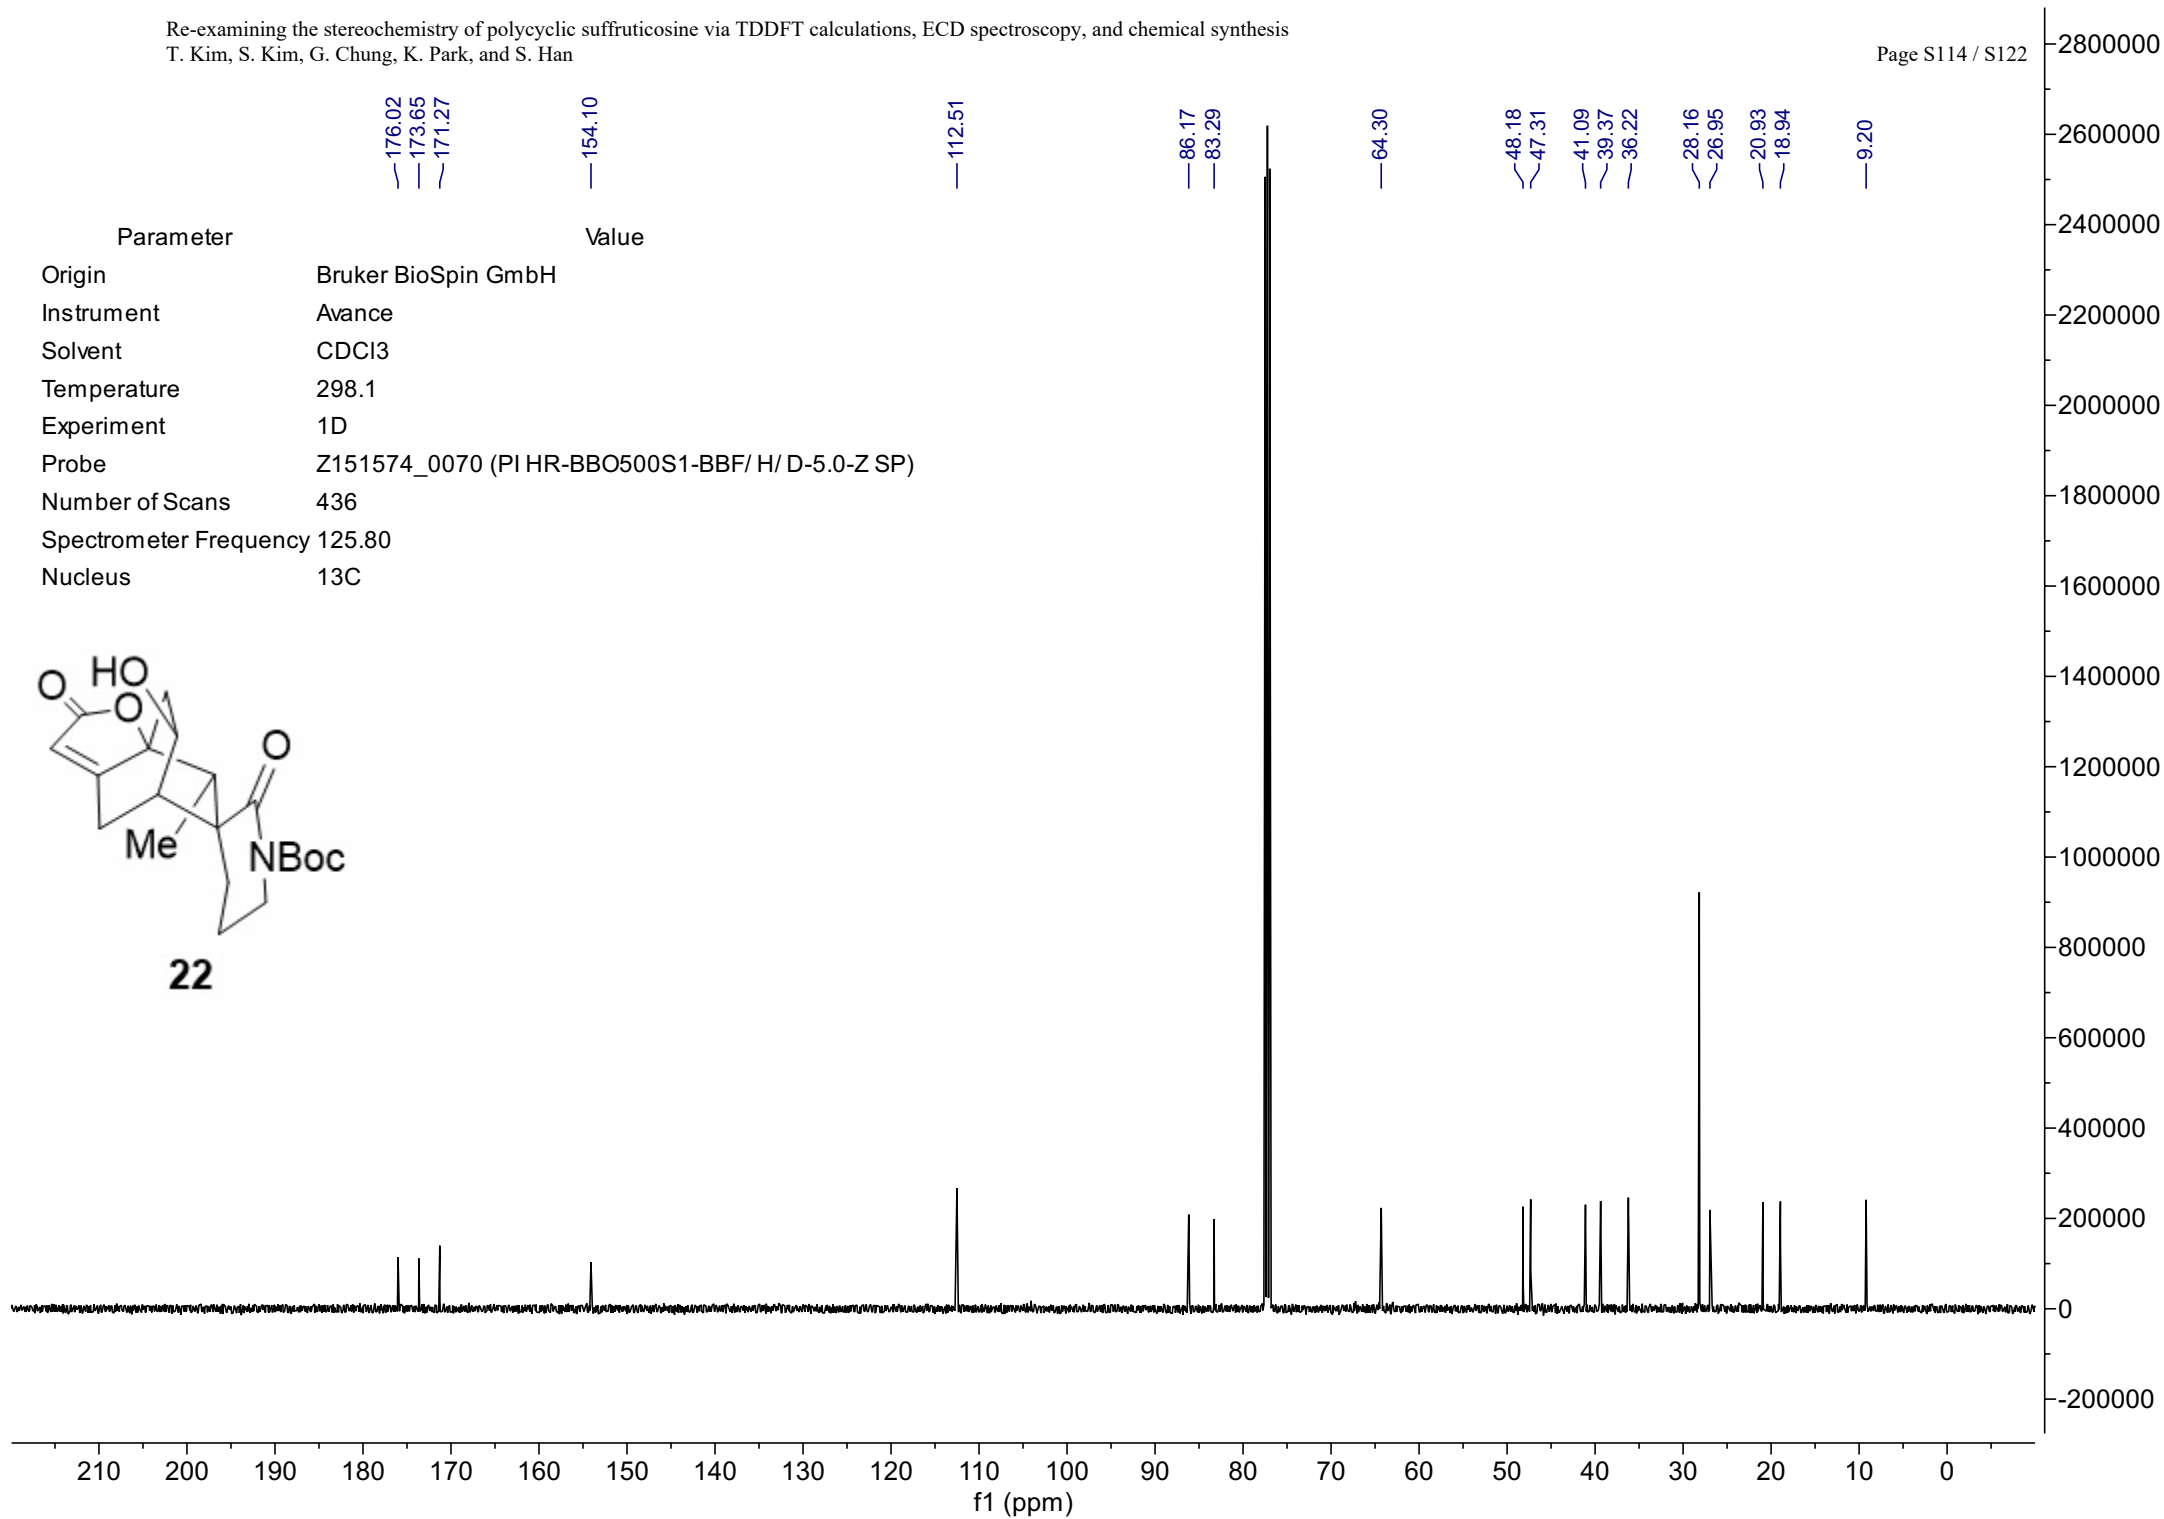

| Parameter              | Value                                            |
|------------------------|--------------------------------------------------|
| Origin                 | Bruker BioSpin GmbH                              |
| Instrument             | Avance                                           |
| Solvent                | CDCl <sub>3</sub>                                |
| Temperature            | 298.0                                            |
| Experiment             | 1D                                               |
| Probe                  | Z151574_0070 (PI HR-BBO500S1-BBF/ H/ D-5.0-Z SP) |
| Number of Scans        | 16                                               |
| Spectrometer Frequency | 500.23                                           |
| Nucleus                | <sup>1</sup> H                                   |

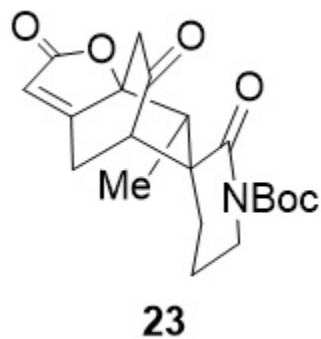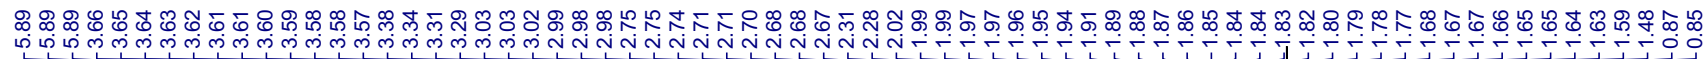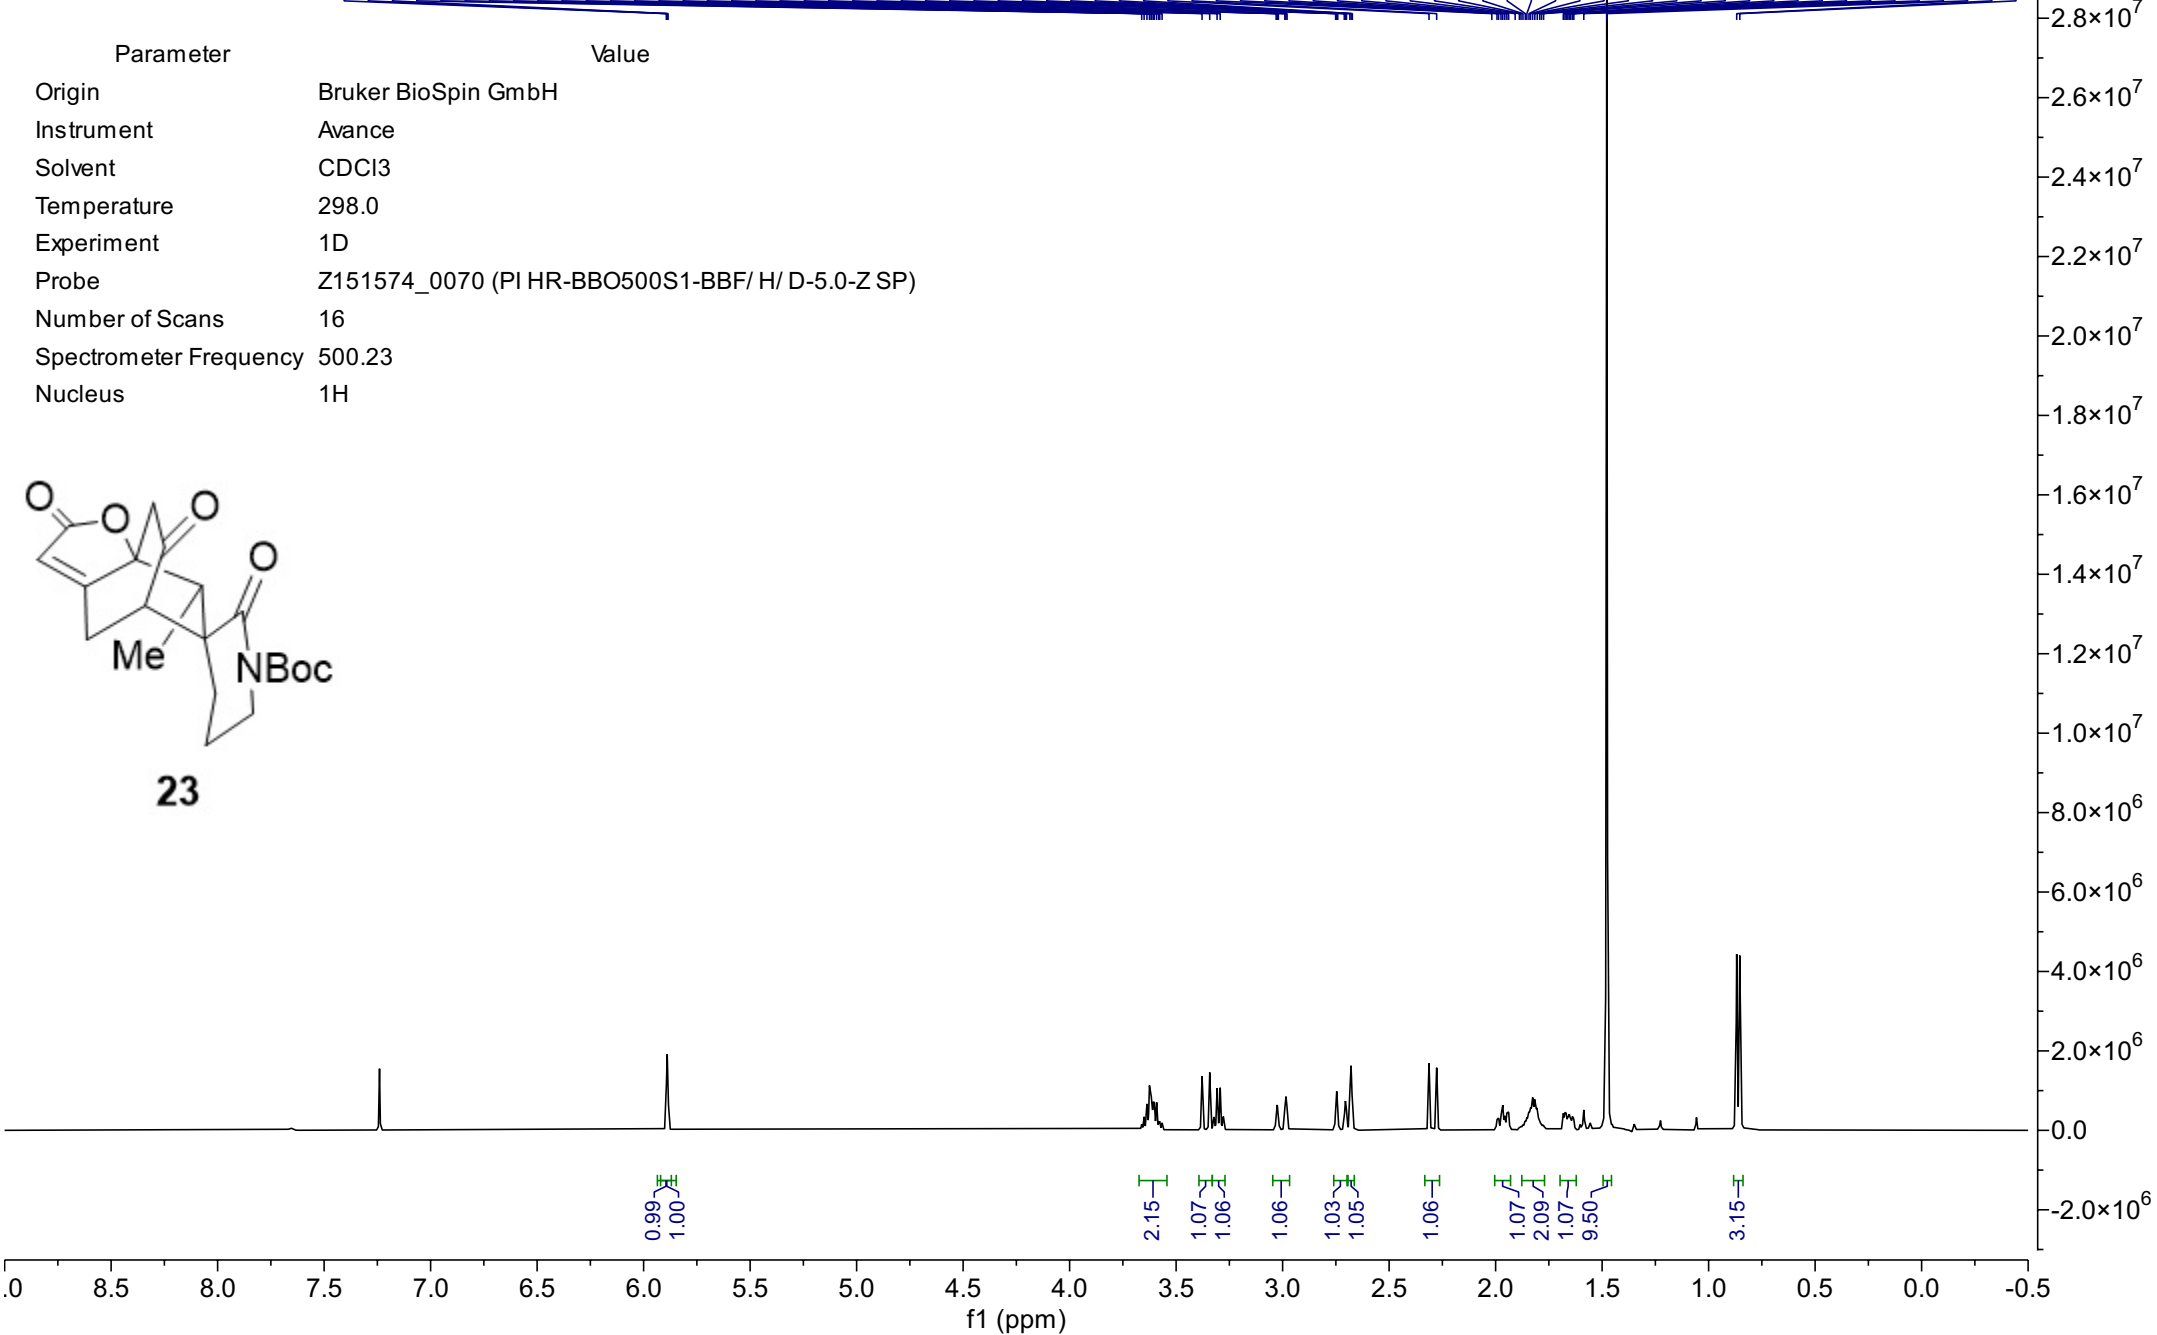

| Parameter              | Value                                            |
|------------------------|--------------------------------------------------|
| Origin                 | Bruker BioSpin GmbH                              |
| Instrument             | Avance                                           |
| Solvent                | CDCl <sub>3</sub>                                |
| Temperature            | 298.2                                            |
| Experiment             | 1D                                               |
| Probe                  | Z151574_0070 (PI HR-BBO500S1-BBF/ H/ D-5.0-Z SP) |
| Number of Scans        | 2505                                             |
| Spectrometer Frequency | 125.80                                           |
| Nucleus                | <sup>13</sup> C                                  |

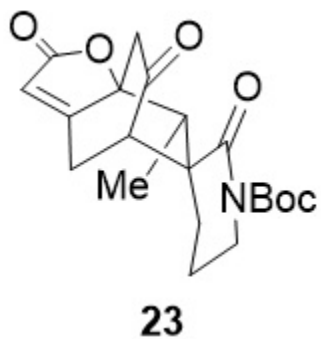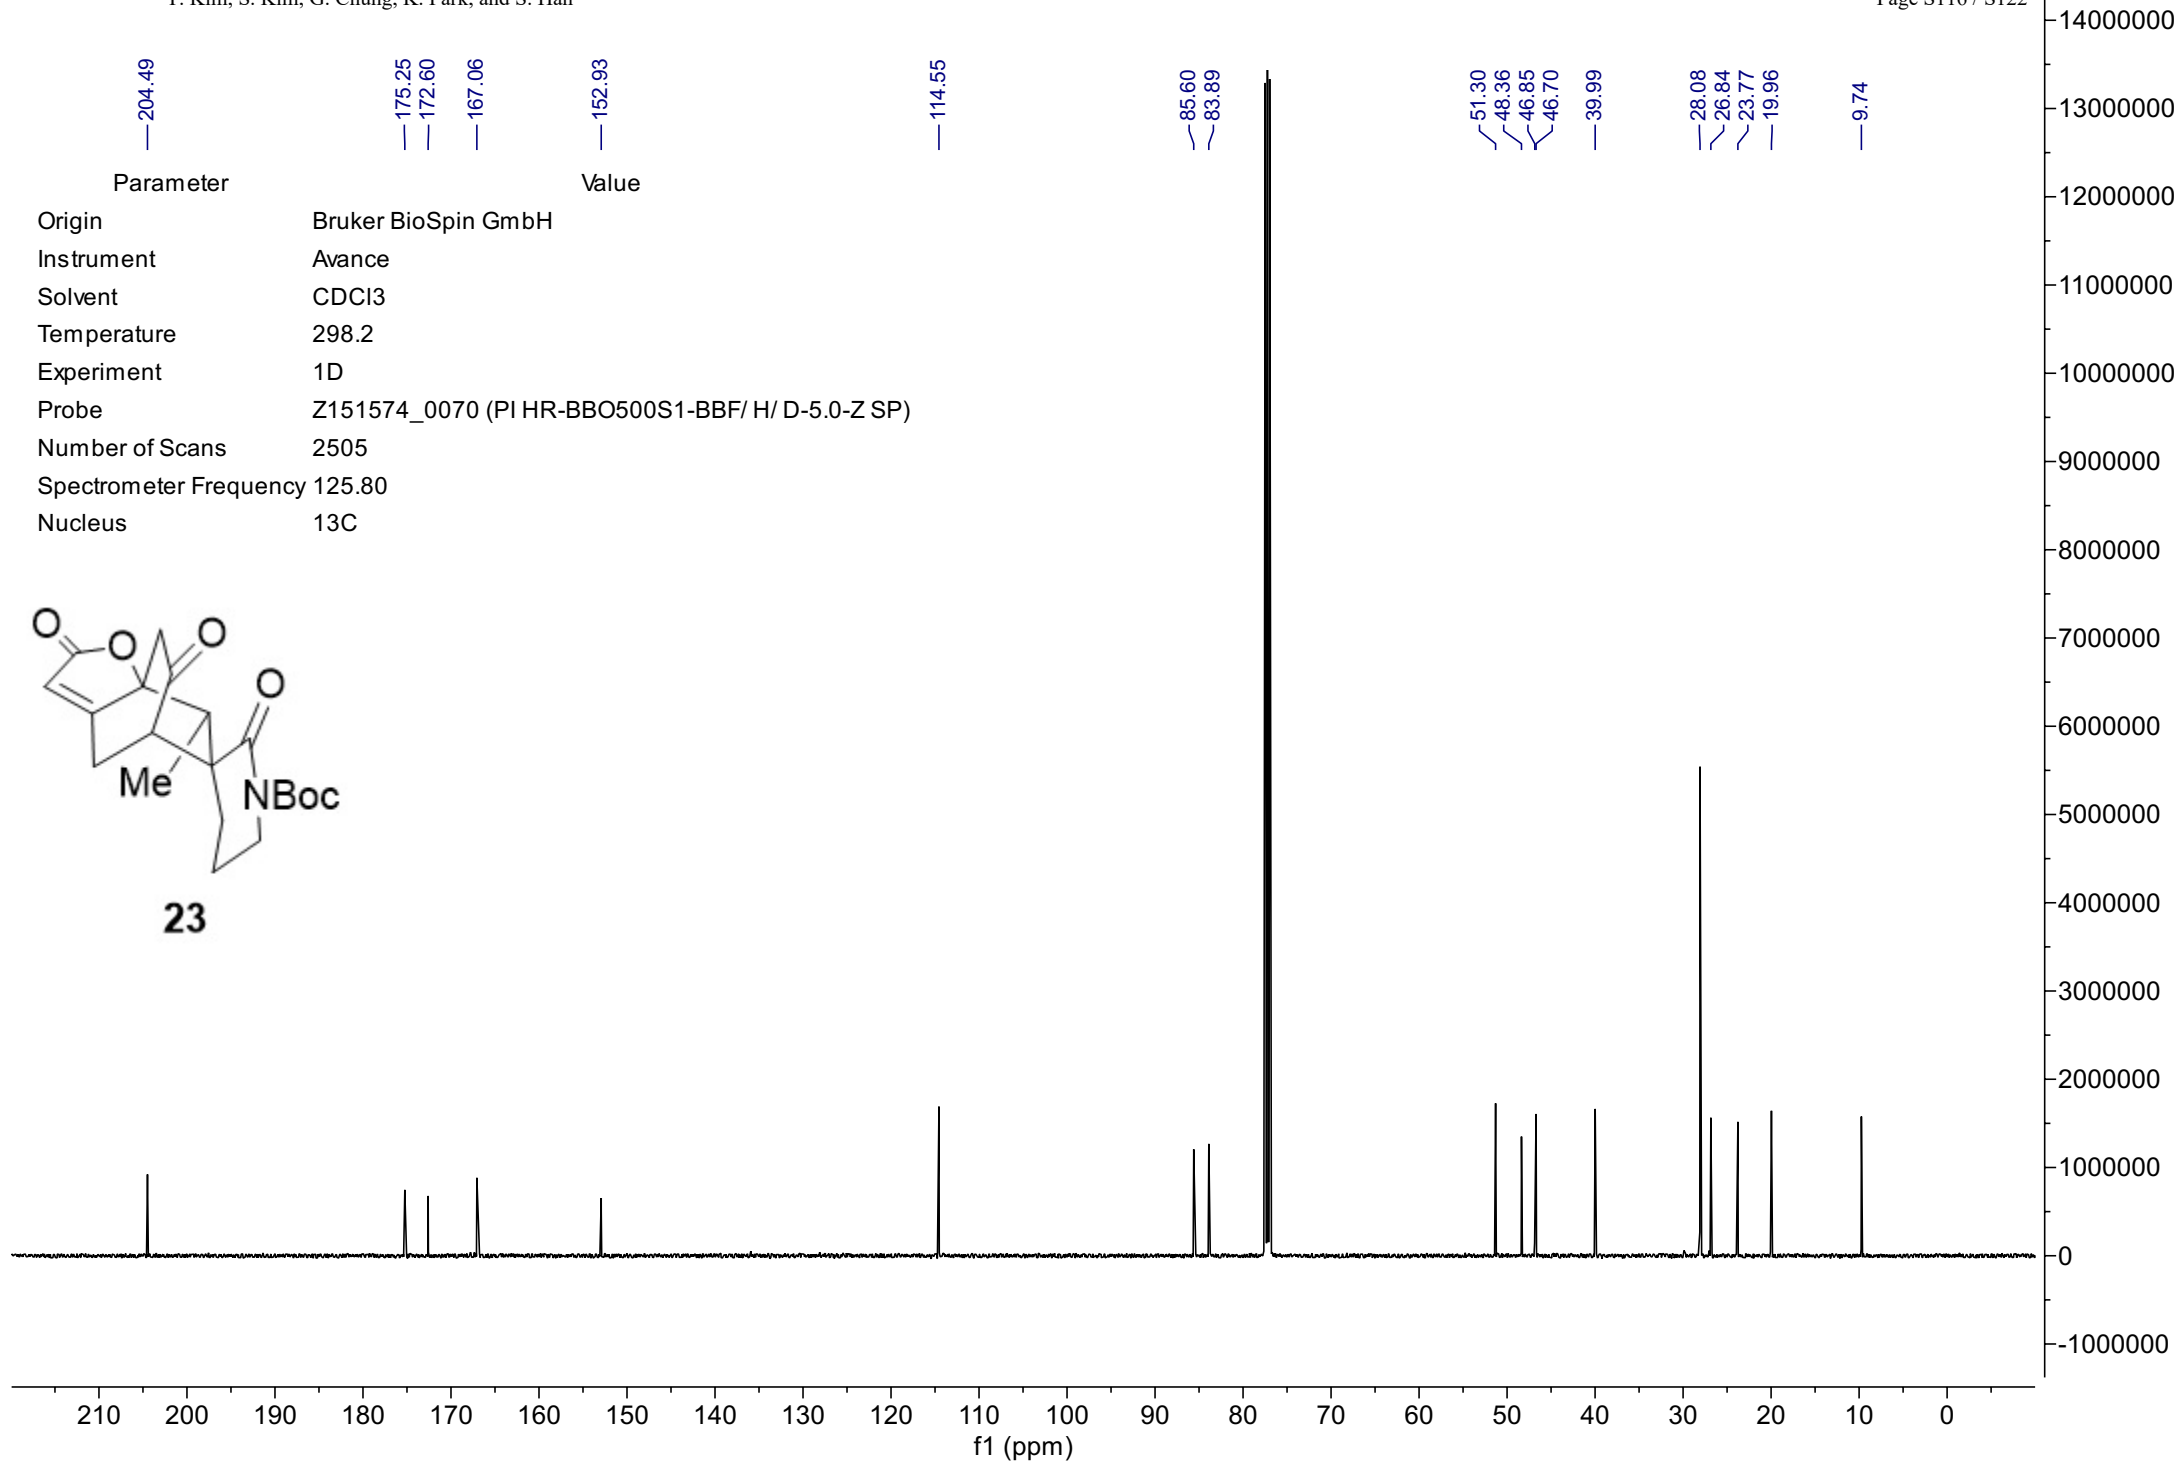

| Parameter              | Value         |
|------------------------|---------------|
| Origin                 | Varian        |
| Instrument             | vnmrs         |
| Solvent                | cdcl3         |
| Temperature            | 25.0          |
| Experiment             | 1D            |
| Probe                  | 5mm_One_probe |
| Number of Scans        | 20            |
| Spectrometer Frequency | 599.78        |
| Nucleus                | 1H            |

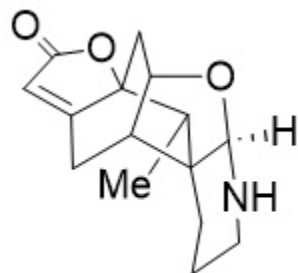

25

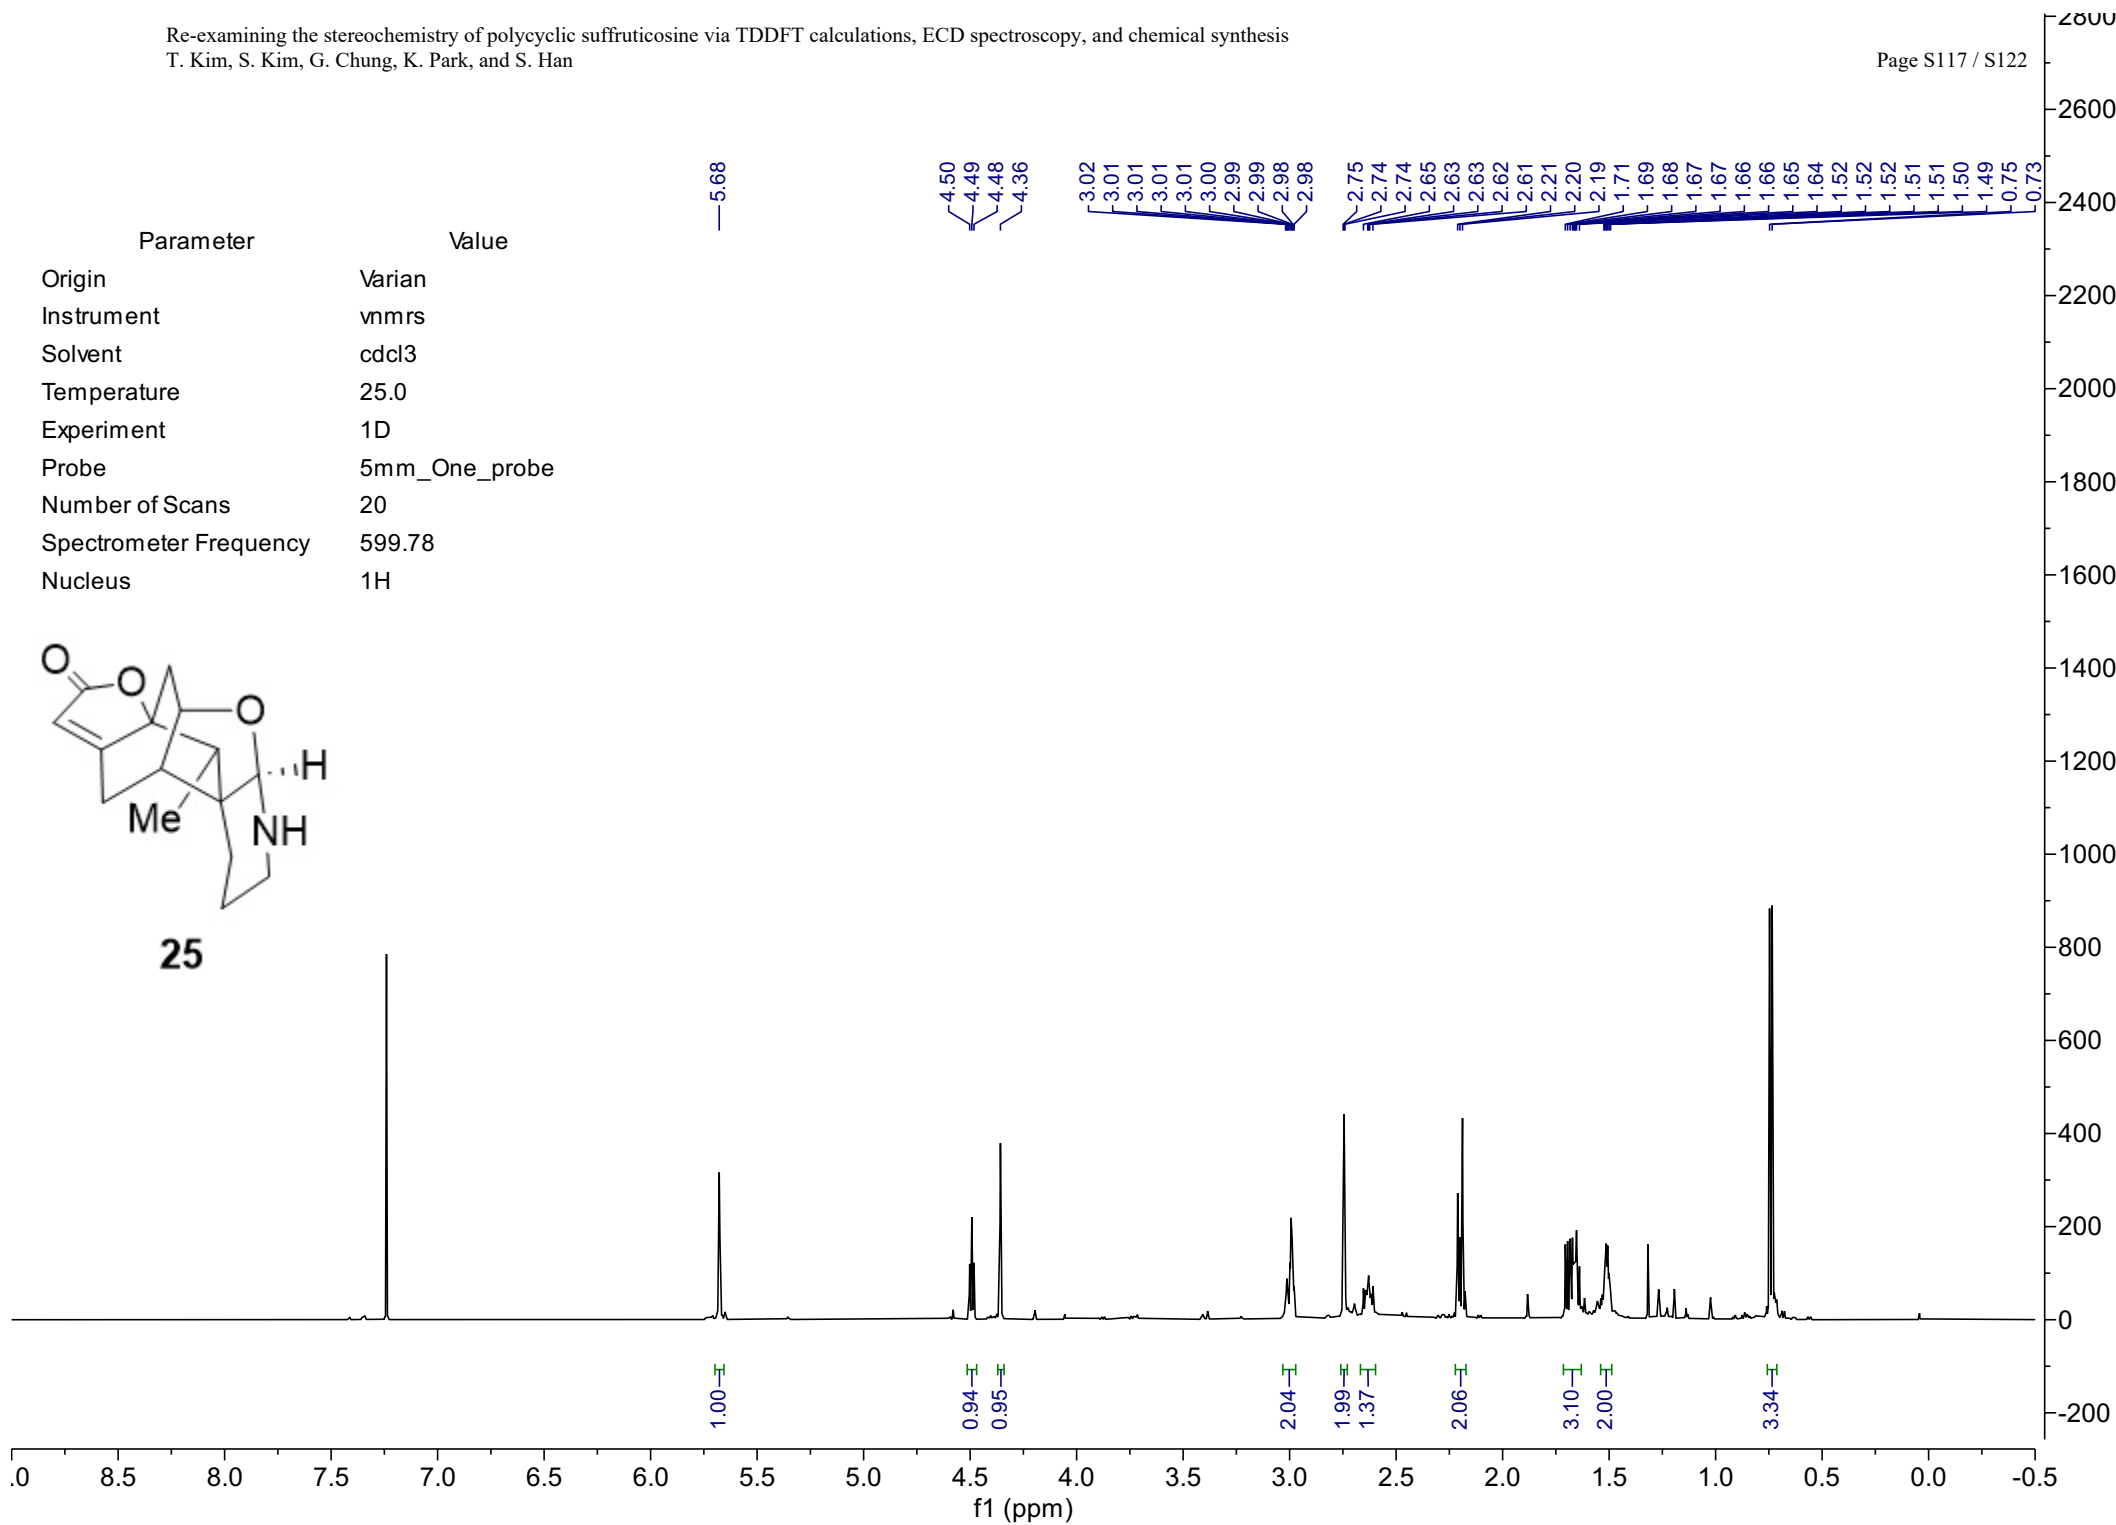

| Parameter              | Value                                            |
|------------------------|--------------------------------------------------|
| Origin                 | Bruker BioSpin GmbH                              |
| Instrument             | Avance                                           |
| Solvent                | CDCl <sub>3</sub>                                |
| Temperature            | 298.0                                            |
| Experiment             | 1D                                               |
| Probe                  | Z151574_0067 (PI HR-BBO500S1-BBF/ H/ D-5.0-Z SP) |
| Number of Scans        | 5600                                             |
| Spectrometer Frequency | 125.80                                           |
| Nucleus                | <sup>13</sup> C                                  |

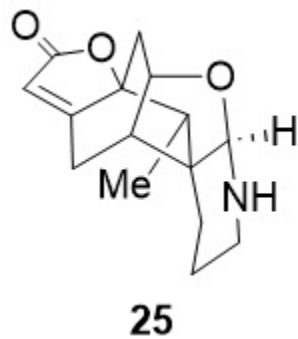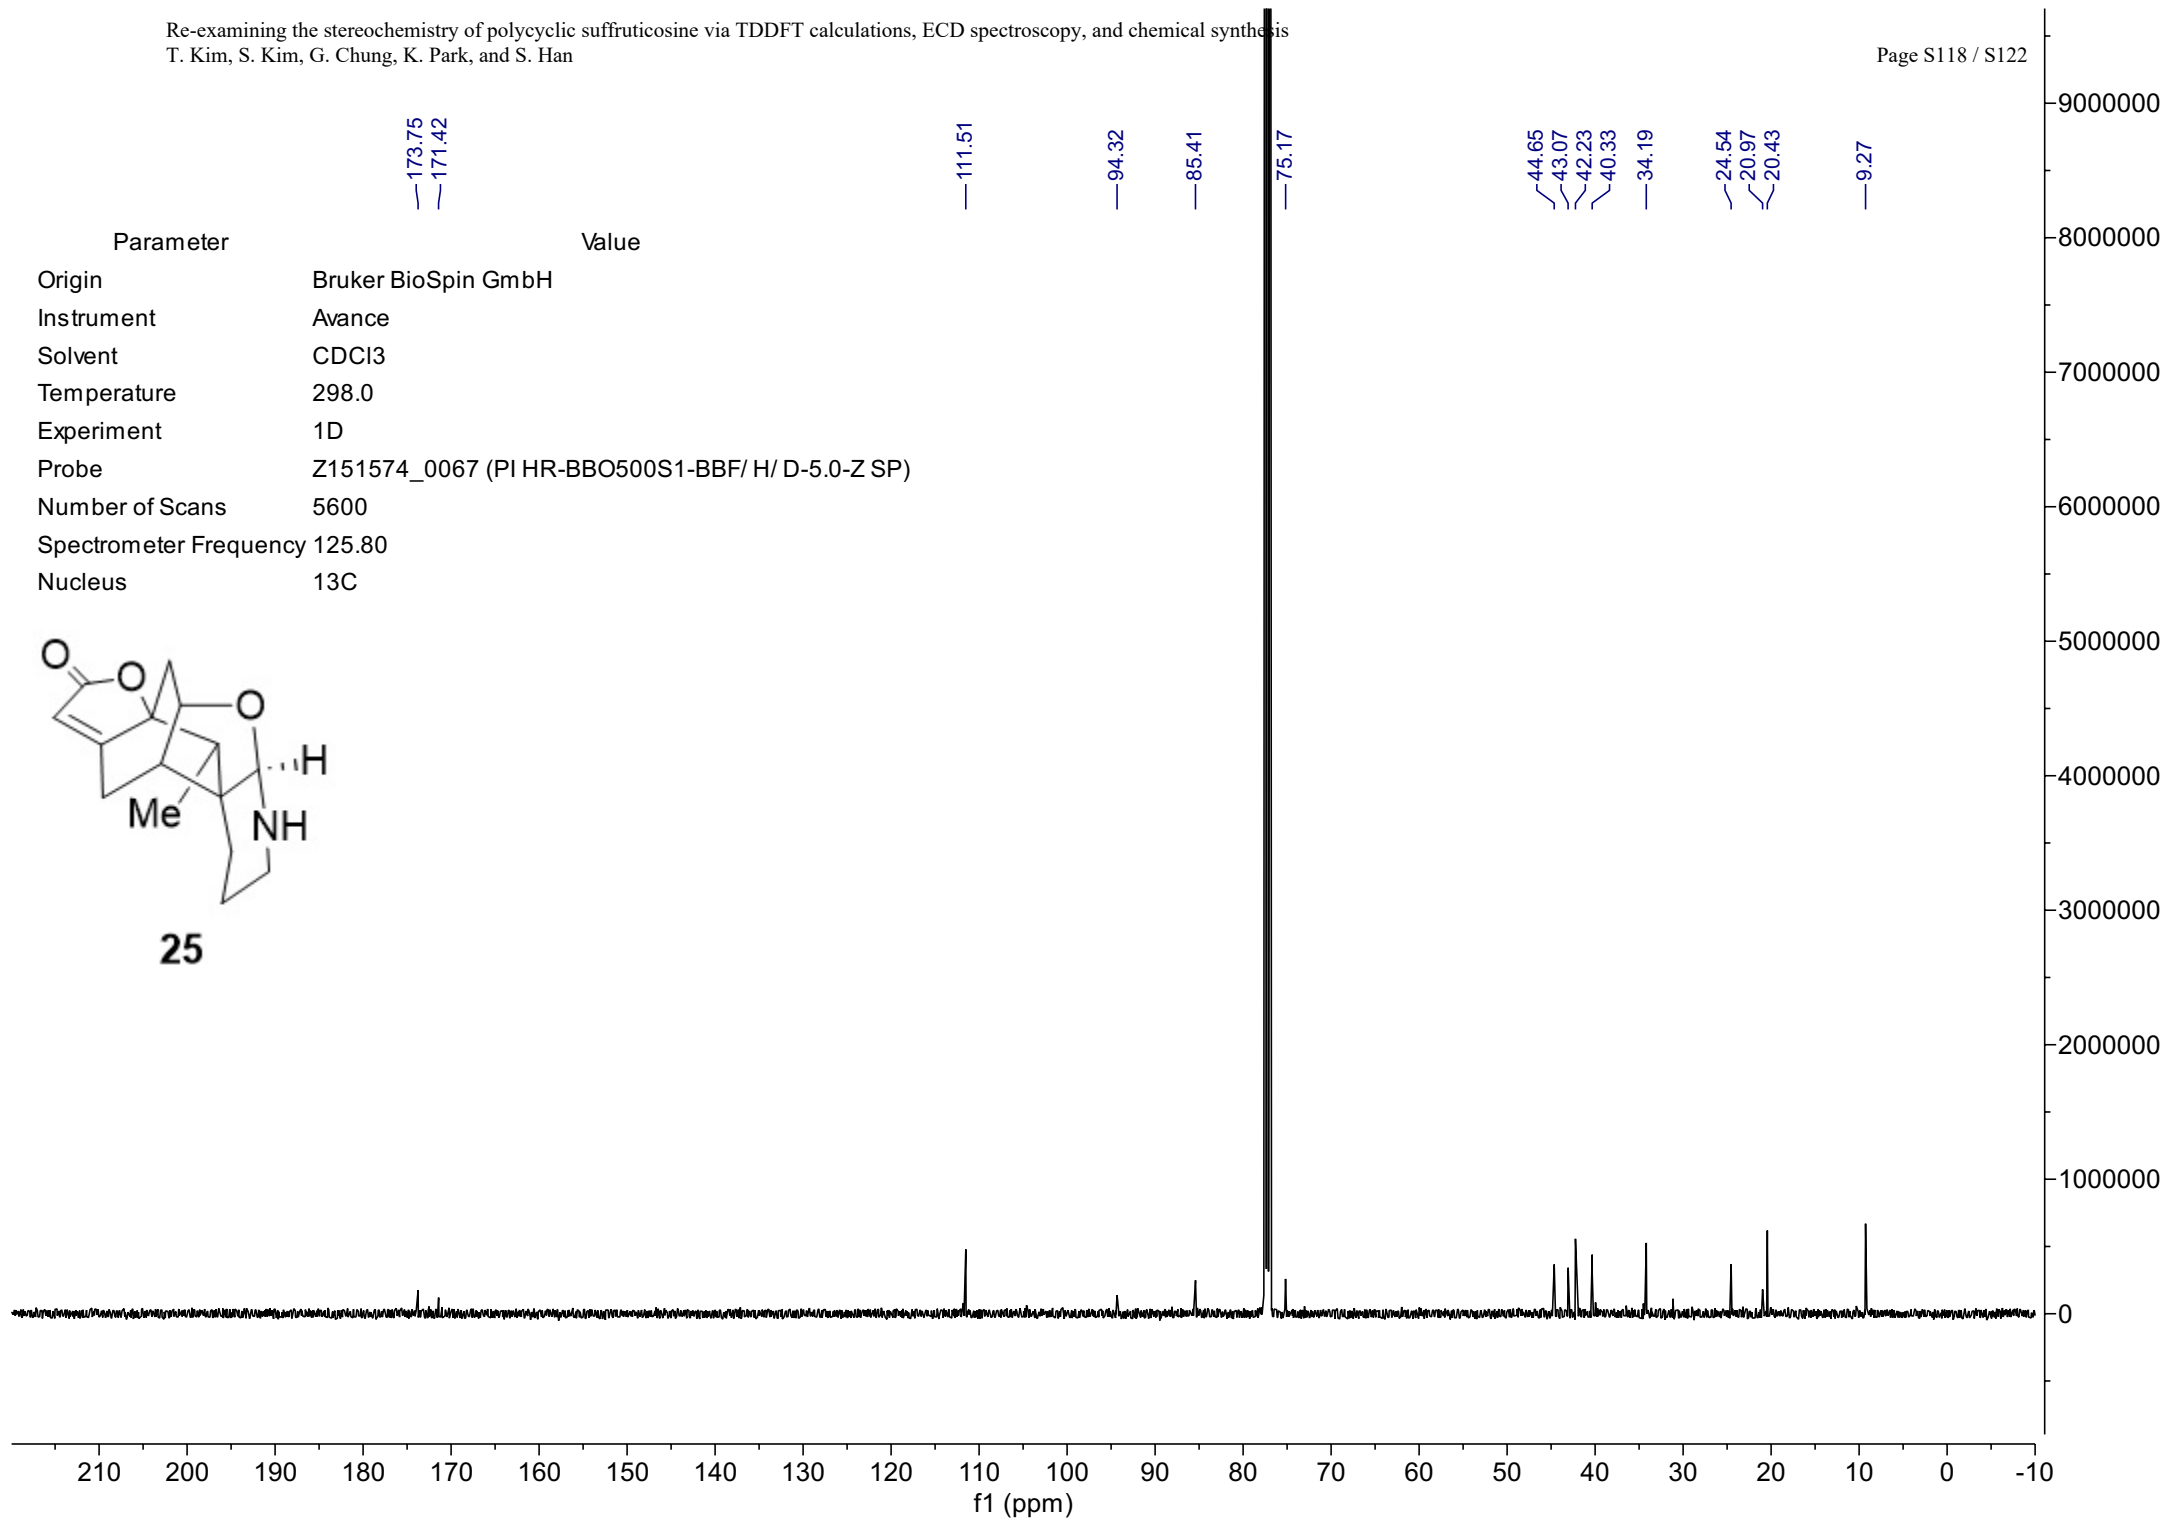

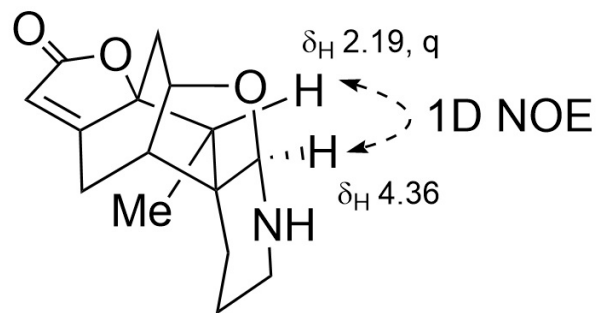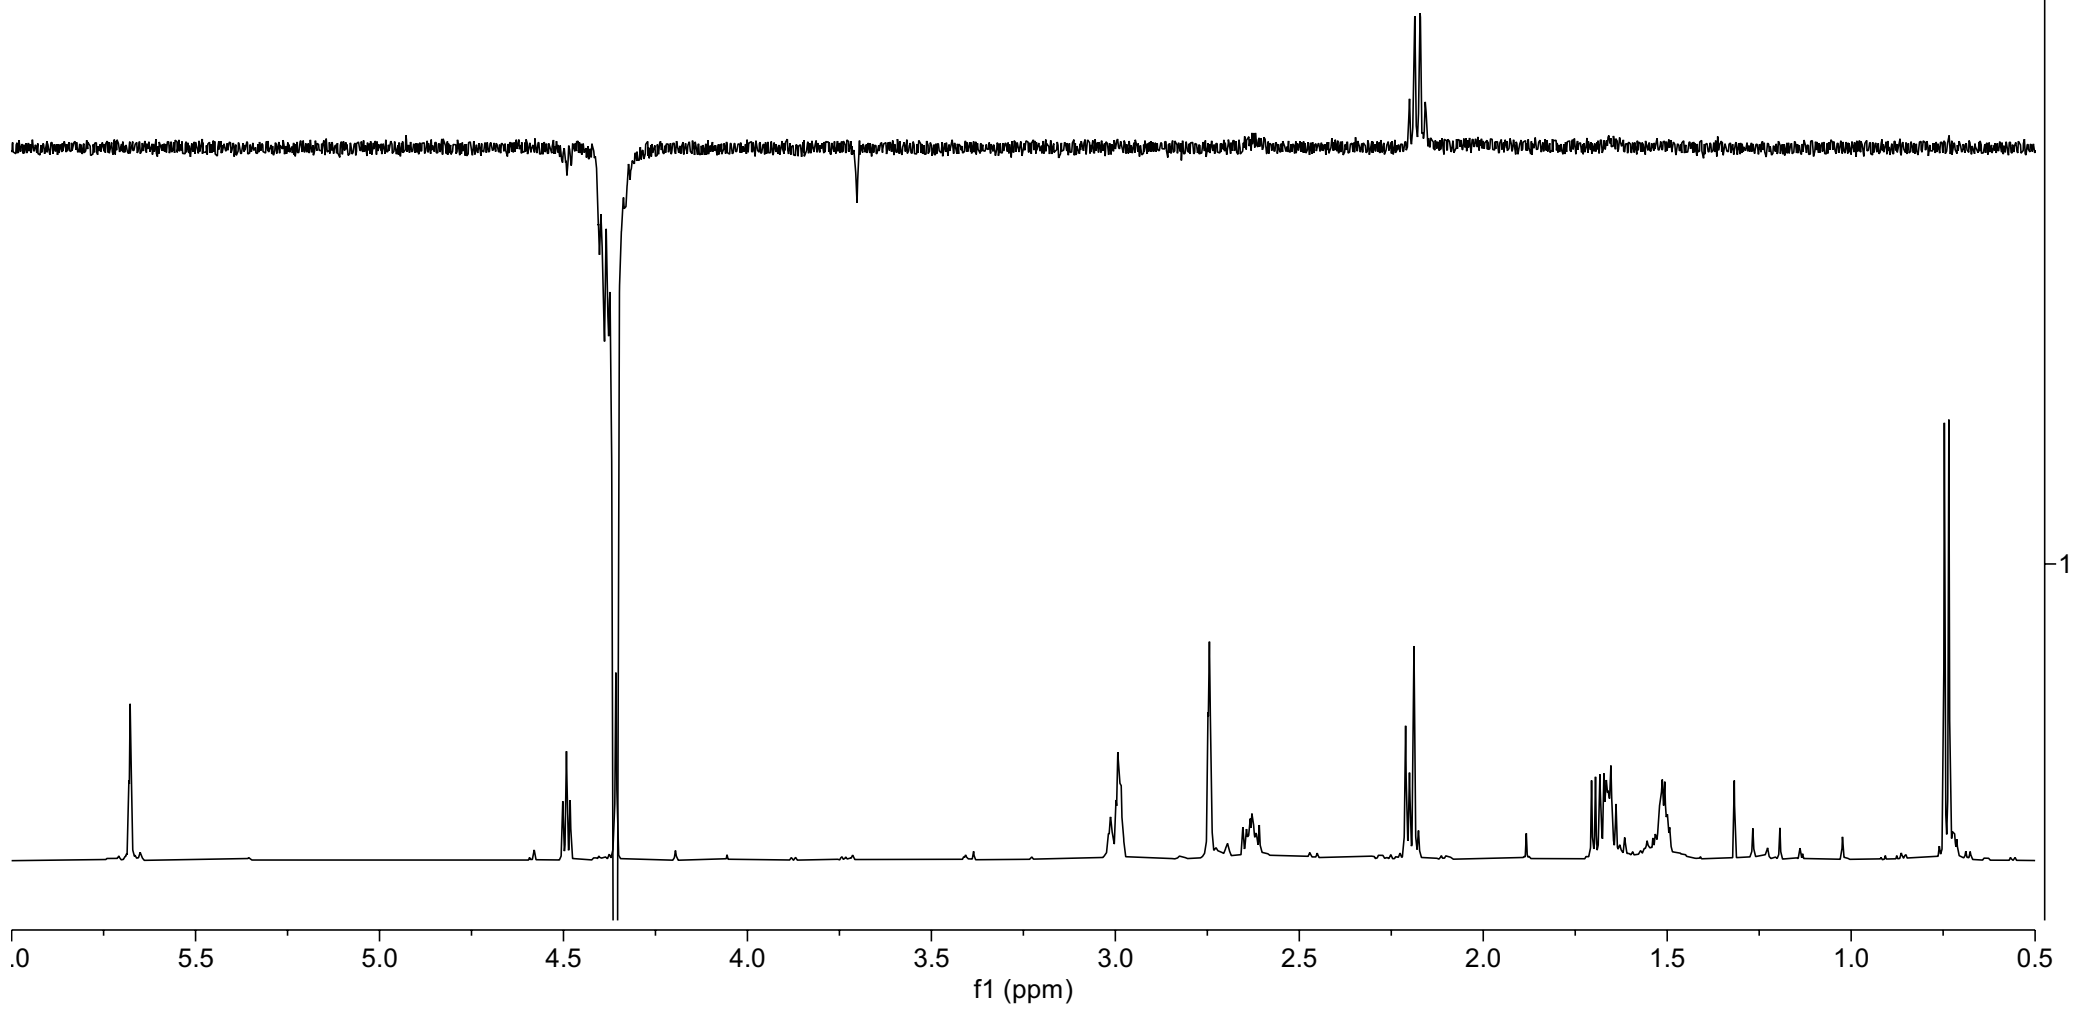

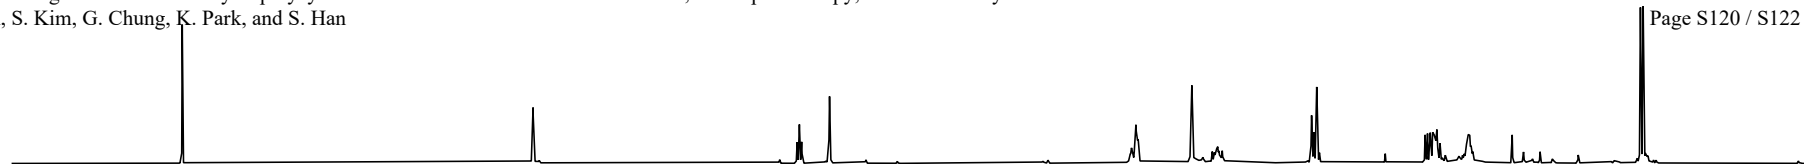

Parameter Value  
Experiment HSQC-EDITED  
Spectrometer Frequency (599.78, 150.83)

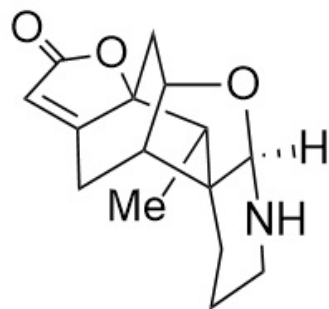

25

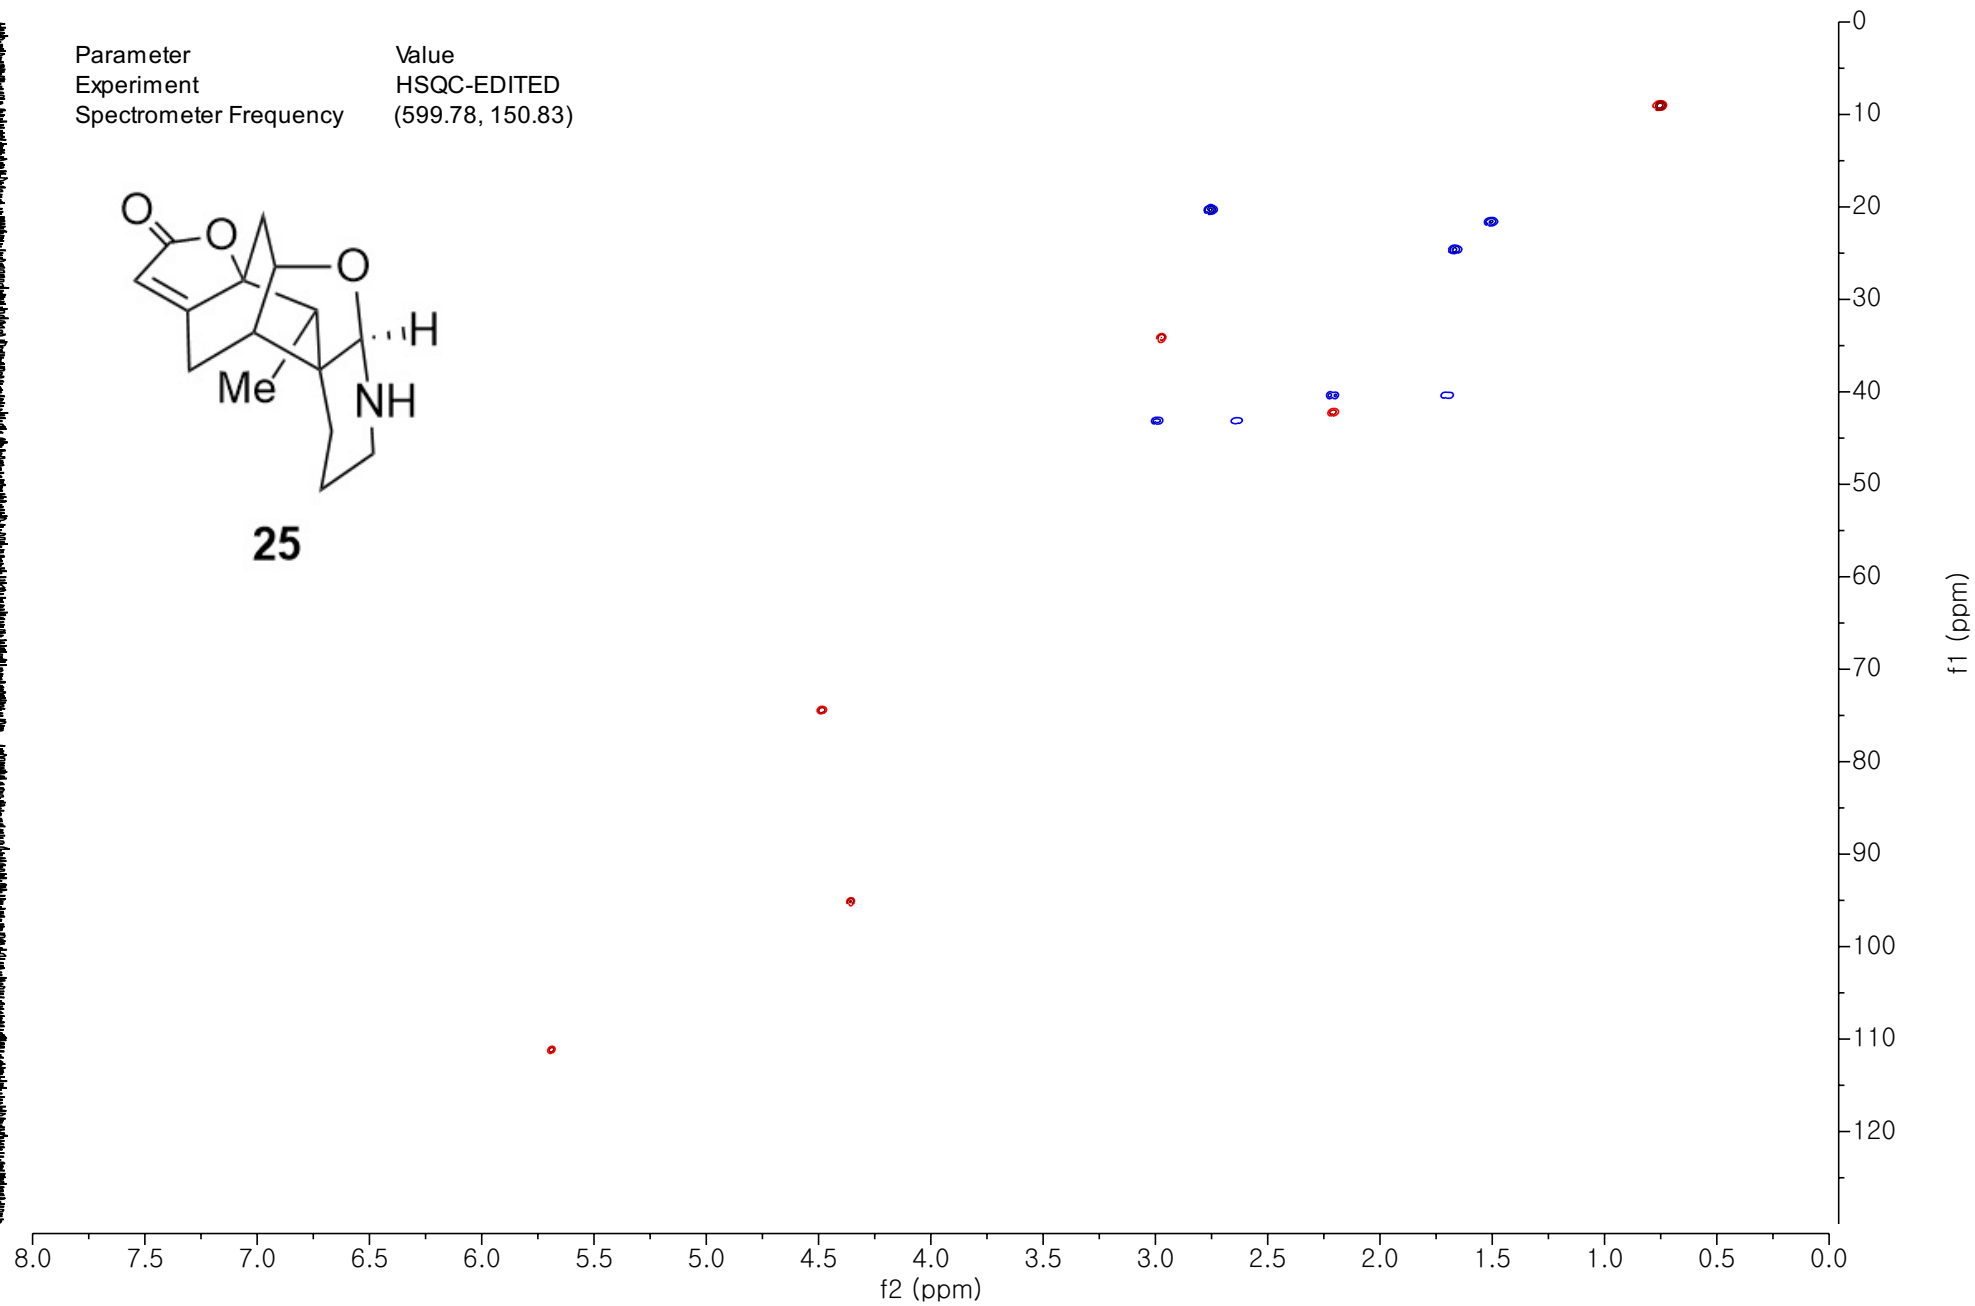



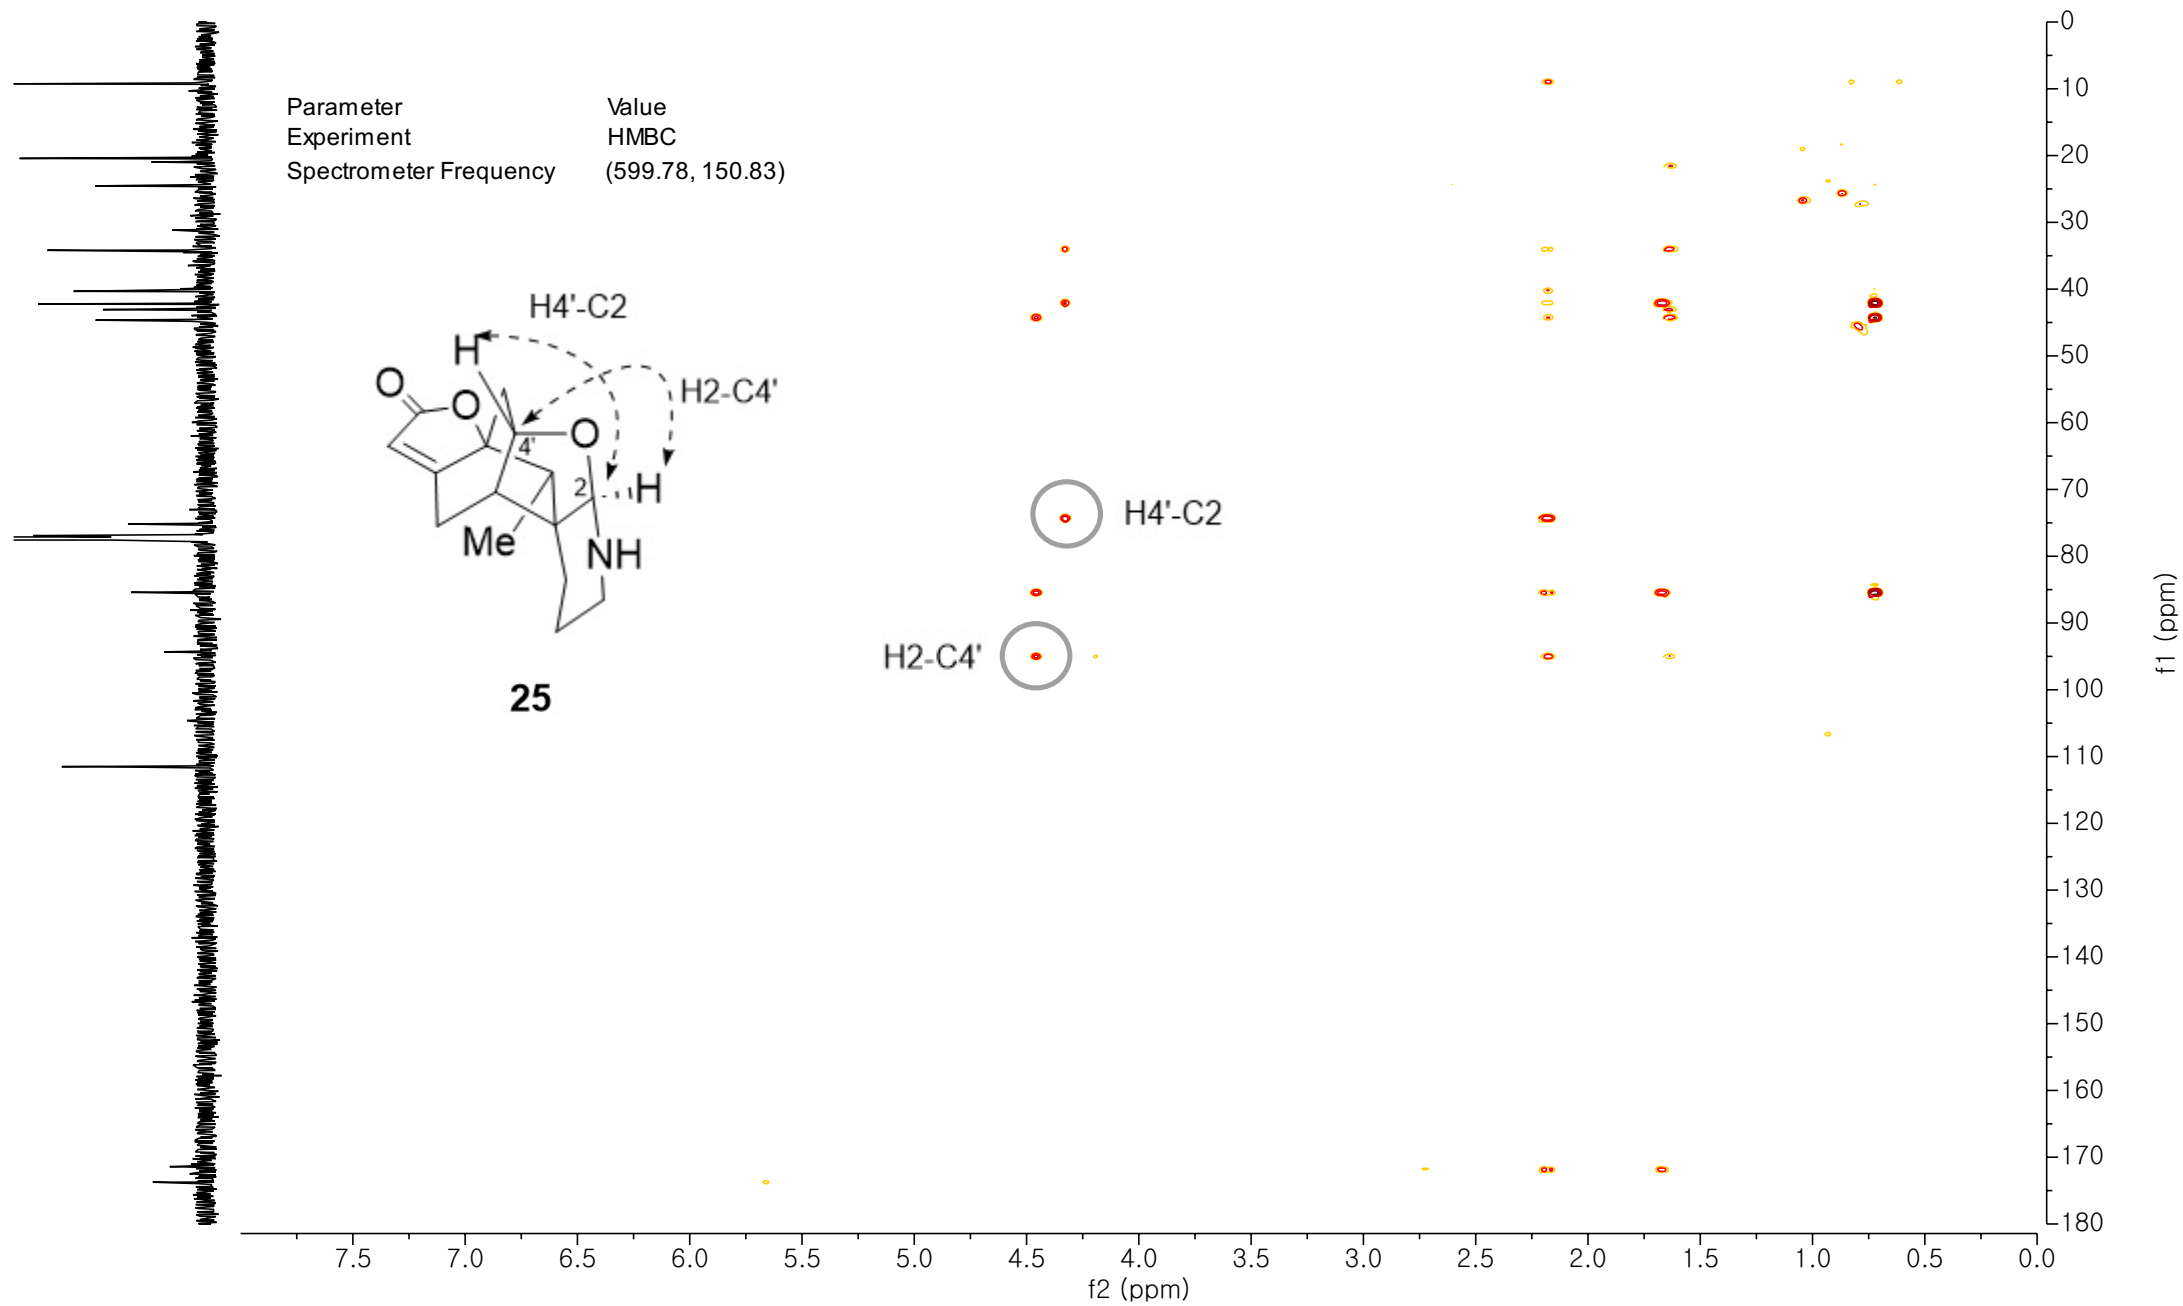

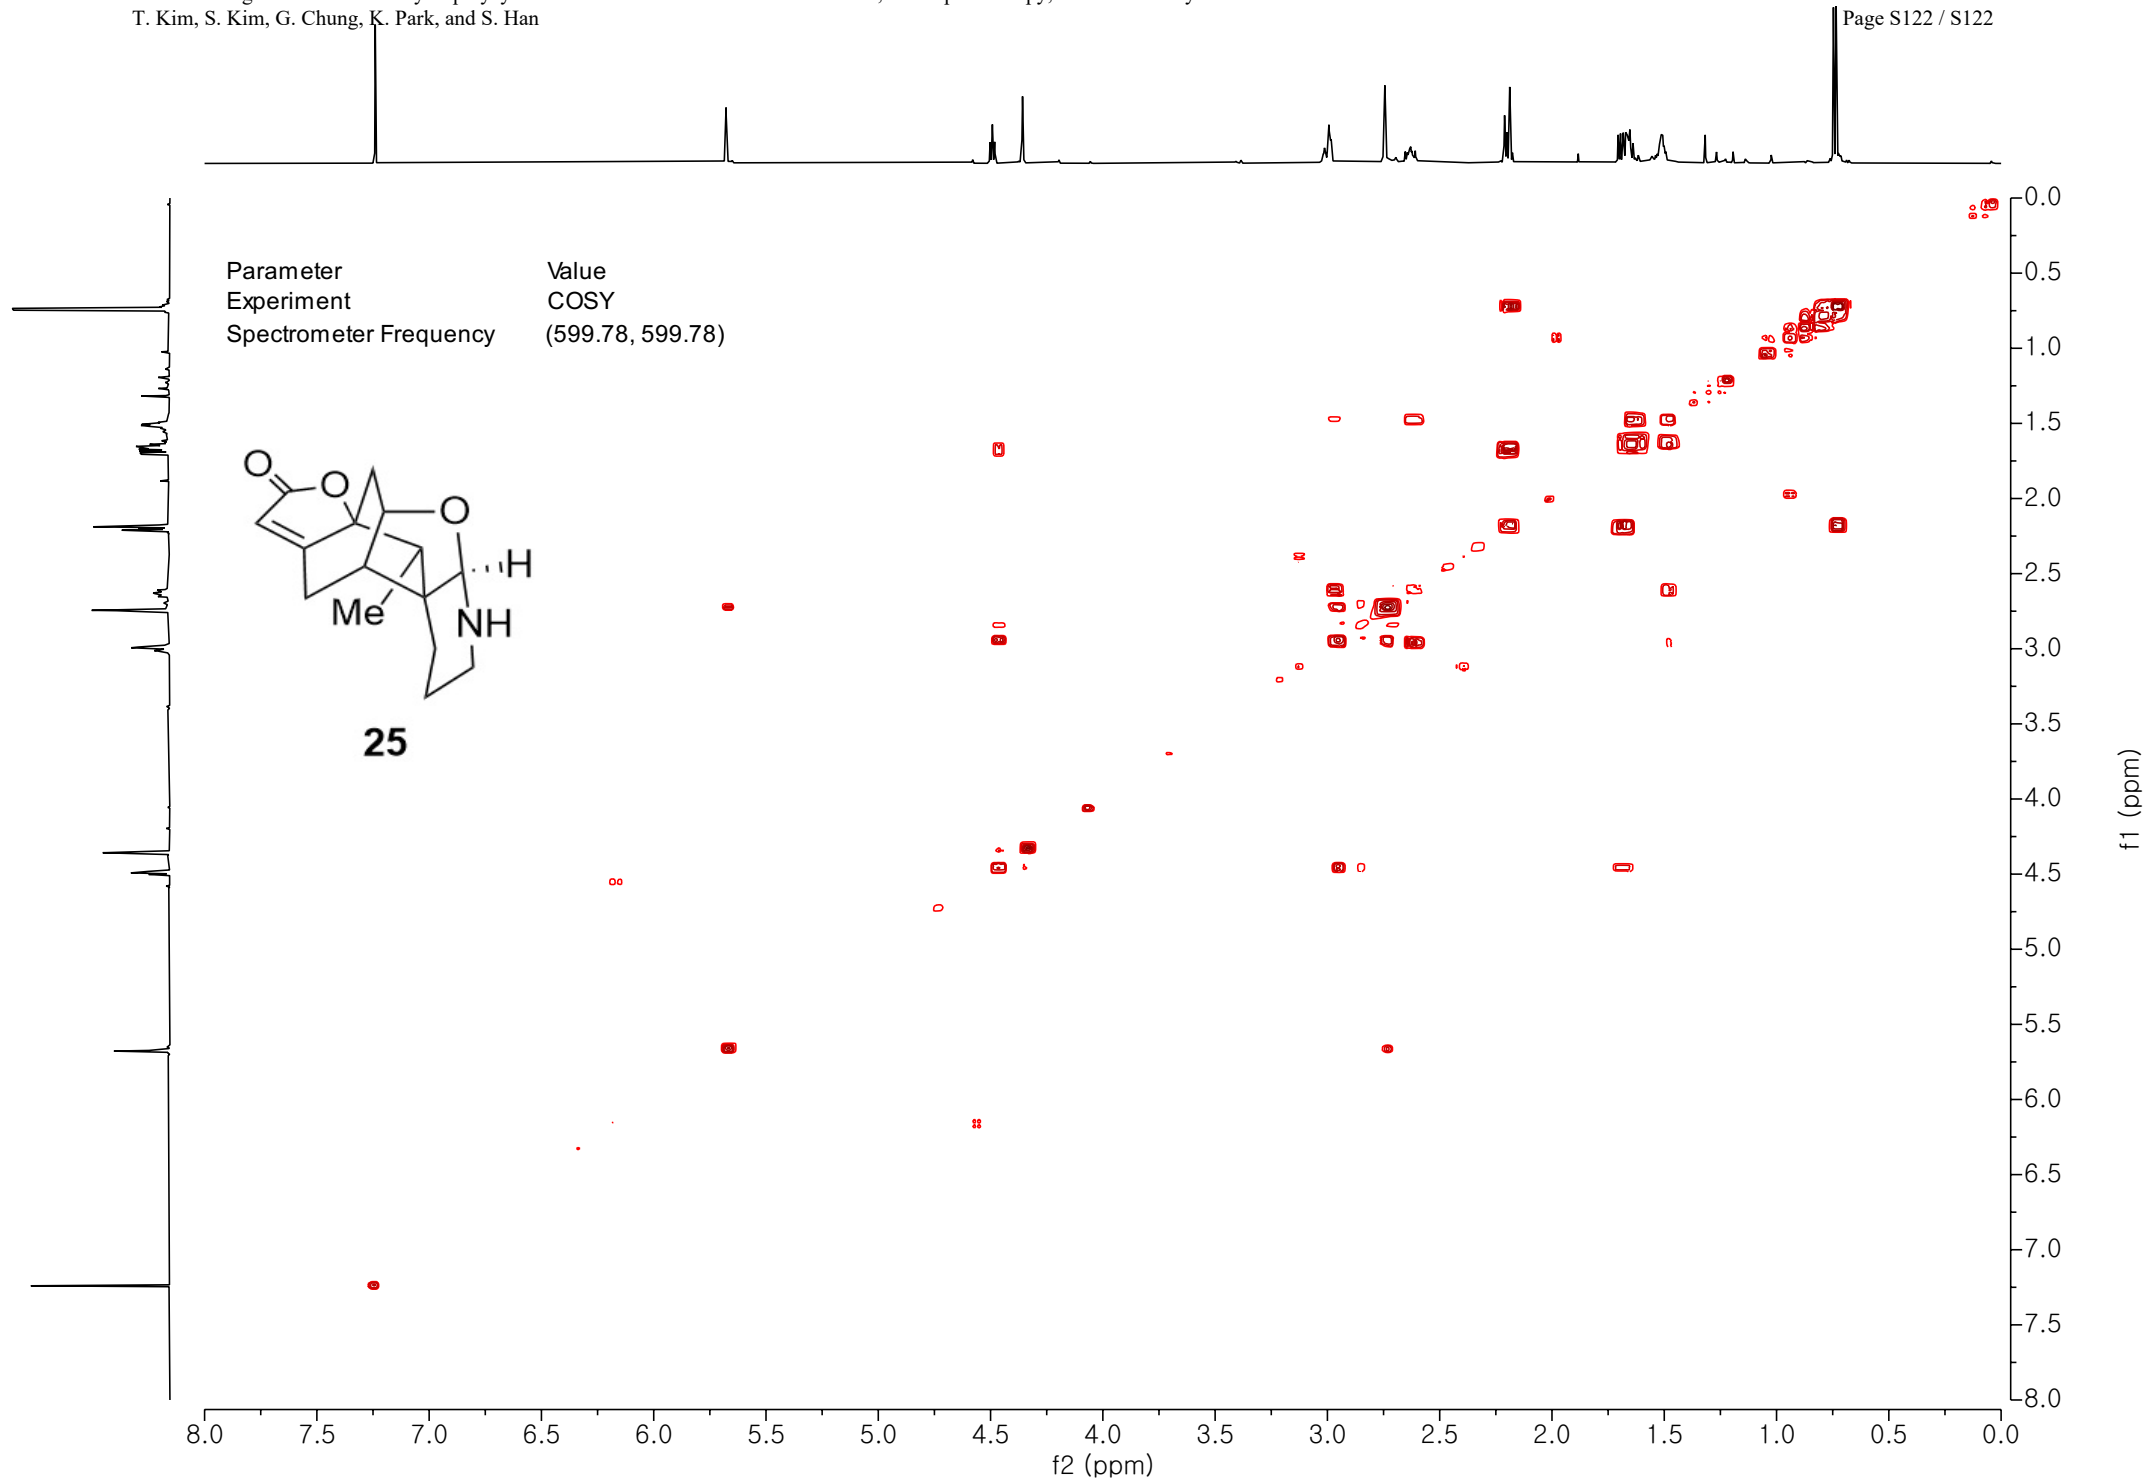

Supplement: d3qo01098h1.pdf [file d3qo01098h1.pdf]
